# Supplementary material for: Weighted Gene Correlation Network Analysis (WGCNA) of Arabidopsis somatic embryogenesis (SE) and identification of key gene modules to uncover SE-associated hub genes
Source: Research Square preprint supplement (doi:10.21203/rs.3.rs-1302556/v1), 2022-01-27
Supplement: Supplementary file 1 [file 9f8d5f7654ff28badfb43cae.xlsx]

## Sheet: Variance filtered genes
	Additional file 1: Table S1. List of variance filtered genes (Variance > 0.25 quantile)
	Gene identifier	Gene symbol	Gene description
1	AT1G01010	NAC DOMAIN CONTAINING PROTEIN 1 (NAC001)	NAC domain containing protein 1
2	AT1G01030	NGATHA3 (NGA3)	AP2/B3-like transcriptional factor family protein
3	AT1G01040	DICER-LIKE 1 (DCL1)	Encodes a Dicer homolog. Dicer is a RNA helicase involved in microRNA processing. Mutations in this locus can result in embryo lethality. Embryo shape at seed maturity is globular-elongate. Other mutants convert the floral meristems to an indeterminate state, others yet show defects in ovule development. mRNA is expressed in all shoot tissues. DCL1 is able to produce miRNAs and siRNAs. The mRNA i…
4	AT1G01050	PYROPHOSPHORYLASE 1 (PPa1)	Encodes a soluble protein with inorganic pyrophosphatase activity that is highly specific for Mg-inorganic pyrophosphate.
5	AT1G01060	LATE ELONGATED HYPOCOTYL (LHY)	LHY encodes a myb-related putative transcription factor involved in circadian rhythm along with another myb transcription factor CCA1
6	AT1G01070	USUALLY MULTIPLE ACIDS MOVE IN AND OUT TRANSPORTERS 28 (UMAMIT28)	Encodes a plasma membrane-localized amino acid transporter likely involved in amino acid export in the developing seed.
7	AT1G01080		RNA-binding (RRM/RBD/RNP motifs) family protein
8	AT1G01090	PYRUVATE DEHYDROGENASE E1 ALPHA (PDH-E1 ALPHA)	pyruvate dehydrogenase E1 alpha subunit
9	AT1G01110	IQ-DOMAIN 18 (IQD18)	Member of IQ67 (CaM binding) domain containing family.
10	AT1G01120	3-KETOACYL-COA SYNTHASE 1 (KCS1)	Encodes a condensing enzyme KCS1 (3-ketoacyl-CoA synthase 1) which is involved in the critical fatty acid elongation process in wax biosynthesis.
11	AT1G01130		CBL-interacting Serine/Threonine-kinase
12	AT1G01140	CBL-INTERACTING PROTEIN KINASE 9 (CIPK9)	Encodes a CBL-interacting protein kinase with similarity to SOS2
13	AT1G01150		Homeodomain-like protein with RING/FYVE/PHD-type zinc finger domain-containing protein
14	AT1G01170		ozone-responsive stress-like protein (DUF1138)
15	AT1G01180		S-adenosyl-L-methionine-dependent methyltransferases superfamily protein
16	AT1G01190	CYTOCHROME P450, FAMILY 78, SUBFAMILY A, POLYPEPTIDE 8 (CYP78A8)	cytochrome P450, family 78, subfamily A, polypeptide 8
17	AT1G01200	RAB GTPASE HOMOLOG A3 (RABA3)	RAB GTPase homolog A3
18	AT1G01225		NC domain-containing protein-like protein
19	AT1G01250		encodes a member of the DREB subfamily A-4 of ERF/AP2 transcription factor family. The protein contains one AP2 domain. There are 17 members in this subfamily including TINY.
20	AT1G01280	CYTOCHROME P450, FAMILY 703, SUBFAMILY A, POLYPEPTIDE 2 (CYP703A2)	member of CYP703A CYP703A2 is expressed specifically in anthers of land plants, catalyzing the in-chain hydroxylation at the C-7 position of medium-chain saturated fatty acids (lauric acid in-chain hydroxylase) which is involved in pollen development (sporopollenin synthesis).
21	AT1G01290	COFACTOR OF NITRATE REDUCTASE AND XANTHINE DEHYDROGENASE 3 (CNX3)	COFACTOR OF NITRATE REDUCTASE AND XANTHINE DEHYDROGENASE 3. Encodes a protein involved in molybdenum cofactor biosynthesis. Homologous to E.coli MoaC. Expression is low in all tissues examined, except in roots. Appears to have targeting signals for chloroplast or mitochondria
22	AT1G01300		Eukaryotic aspartyl protease family protein
23	AT1G01320	REDUCED CHLOROPLAST COVERAGE (REC1)	Encodes REDUCED CHLOROPLAST COVERAGE 1 (REC1) a protein with similarity to the FLOURY locus in maize. Located in the nucleus and cytosol. Contributes to establishing the size of the chloroplast compartment.
24	AT1G01330
25	AT1G01340	CYCLIC NUCLEOTIDE GATED CHANNEL 10 (CNGC10)	member of Cyclic nucleotide gated channel family, regulated by Bacillus amyloliquefaciens under high calcium stress.
26	AT1G01360	REGULATORY COMPONENT OF ABA RECEPTOR 1 (RCAR1)	Encodes RCAR1 (regulatory components of ABA receptor). Interacts with and regulates the type 2C protein phosphatases (PP2Cs) ABI1 and ABI2. Functions as abscisic acid sensor. The mRNA is cell-to-cell mobile.
27	AT1G01380	ENHANCER OF TRY AND CPC 1 (ETC1)	ETC1 is involved in trichome and root hair patterning in Arabidopsis.
28	AT1G01390		Phosphatidylinositol 4-phosphate 5-kinase (PIP5K) enzyme family member.
29	AT1G01410	PUMILIO 22 (PUM22)	Encodes a member of the Arabidopsis Pumilio (APUM) proteins containing PUF domain (eight repeats of approximately 36 amino acids each). PUF proteins regulate both mRNA stability and translation through sequence-specific binding to the 3' UTR of target mRNA transcripts.
30	AT1G01420	UDP-GLUCOSYL TRANSFERASE 72B3 (UGT72B3)	Phosphatidylinositol 4-phosphate 5-kinase (PIP5K) enzyme family member.
31	AT1G01430	TRICHOME BIREFRINGENCE-LIKE 25 (TBL25)	Encodes a member of the TBL (TRICHOME BIREFRINGENCE-LIKE) gene family containing a plant-specific DUF231 (domain of unknown function) domain. TBL gene family has 46 members, two of which (TBR/AT5G06700 and TBL3/AT5G01360) have been shown to be involved in the synthesis and deposition of secondary wall cellulose, presumably by influencing the esterification state of pectic polymers.Functions as a …
32	AT1G01450		Protein kinase superfamily protein
33	AT1G01460	(PIPK11)	Type I phosphatidylinositol-4-phosphate 5-kinase, subfamily A.
34	AT1G01470	LATE EMBRYOGENESIS ABUNDANT 14 (LEA14)	Encodes late-embryogenesis abundant protein whose mRNA levels are induced in response to wounding and light stress. Might be involved in protection against desiccation.
35	AT1G01480	1-AMINO-CYCLOPROPANE-1-CARBOXYLATE SYNTHASE 2 (ACS2)	a member of the 1-aminocyclopropane-1-carboxylate (ACC) synthase (S-adenosyl-L-methionine methylthioadenosine-lyase, EC 4.4.1.14) gene family, isolated from a flower-specific cDNA library.
36	AT1G01490	HEAVY METAL PROTEIN 1 (ATHMP01)	Heavy metal transport/detoxification superfamily protein
37	AT1G01500		Erythronate-4-phosphate dehydrogenase family protein
38	AT1G01520	ALTERED SEED GERMINATION 4 (ASG4)	RVE3 is one of eleven homologous MYB-like transcription factors in Arabidopsis and a member of the RVE8 clade. Plays a minor role in clock regulation.
39	AT1G01530	AGAMOUS-LIKE 28 (AGL28)	AGAMOUS-like 28
40	AT1G01560	MAP KINASE 11 (MPK11)	Member of MAP Kinase family. Flg22-induced activation is blocked by AvrRpt2.
41	AT1G01570		transferring glycosyl group transferase (DUF604)
42	AT1G01600	CYTOCHROME P450, FAMILY 86, SUBFAMILY A, POLYPEPTIDE 4 (CYP86A4)	Encodes a member of the CYP86A subfamily of cytochrome p450 genes. Expressed significantly at highest level in mature stems and flowers.
43	AT1G01610	GLYCEROL-3-PHOSPHATE SN-2-ACYLTRANSFERASE 4 (GPAT4)	bifunctional sn-glycerol-3-phosphate 2-O-acyltransferase/phosphatase. Involved in cutin assembly and is functionally redundant with GPAT8.
44	AT1G01620	PLASMA MEMBRANE INTRINSIC PROTEIN 1C (PIP1C)	a member of the plasma membrane intrinsic protein subfamily PIP1. localizes to the plasma membrane and exhibits water transport activity in Xenopus oocyte. expressed ubiquitously and protein level decreases slightly during leaf development. Involved redundantly with PIP1;1/2/4/5 in hydraulics and carbon fixation, regulates the expression of related genes that affect plant growth and development.
45	AT1G01630		Sec14p-like phosphatidylinositol transfer family protein
46	AT1G01640		Putative role in flower development. Comparison of SALK_011721C to Columbia wild type resulted in a trend toward earlier flowering in the mutant (P=0.1) (Stapleton and Woodruff 2009, personal communication).
47	AT1G01650	SIGNAL PEPTIDE PEPTIDASE-LIKE 4 (SPPL4)	SIGNAL PEPTIDE PEPTIDASE-LIKE 4
48	AT1G01660	(PUB55)	Plant U-box type E3 ubiquitin ligase (PUB).
49	AT1G01670	(PUB56)	Plant U-box type E3 ubiquitin ligase (PUB).
50	AT1G01690	PUTATIVE RECOMBINATION INITIATION DEFECTS 3 (PRD3)	Encodes a novel plant-specific protein that is involved in meiotic double strand break formation.
51	AT1G01700	ROP (RHO OF PLANTS) GUANINE NUCLEOTIDE EXCHANGE FACTOR 2 (ROPGEF2)	Encodes a member of KPP-like gene family, homolog of KPP (kinase partner protein) gene in tomato. Also a member of the RopGEF (guanine nucleotide exchange factor) family, containing the novel PRONE domain (plant-specific Rop nucleotide exchanger), which is exclusively active towards members of the Rop subfamily.
52	AT1G01720	(ATAF1)	Belongs to a large family of putative transcriptional activators with NAC domain. Transcript level increases in response to wounding and abscisic acid. ATAF1 attentuates ABA signaling and sythesis. Mutants are hyposensitive to ABA. The mRNA is cell-to-cell mobile.
53	AT1G01725		adenylosuccinate synthetase
54	AT1G01730		hypothetical protein
55	AT1G01750	ACTIN DEPOLYMERIZING FACTOR 11 (ADF11)	actin depolymerizing factor 11
56	AT1G01760	ORTHOLOG OF YEAST TAD1 (TAD1)	denosine deaminases acting on tRNA
57	AT1G01780	PLIM2B (PLIM2b)	Encodes a member of the Arabidopsis LIM proteins: a family of actin bundlers with distinct expression patterns. WLIM1, WLIM2a, and WLIM2b are widely expressed, whereas PLIM2a, PLIM2b, and PLIM2c are predominantly expressed in pollen. Regulates actin cytoskeleton organization. The mRNA is cell-to-cell mobile.
58	AT1G01790	K+ EFFLUX ANTIPORTER 1 (KEA1)	Encodes a member of the cation/proton antiporters-2 antiporter superfamily, the K efflux antiporter KEA1 that is localized to the chloroplast envelope.
59	AT1G01800		NAD(P)-binding Rossmann-fold superfamily protein
60	AT1G01830		ARM repeat superfamily protein
61	AT1G01840		AP2-like ethylene-responsive transcription factor SNZ
62	AT1G01860	PALEFACE 1 (PFC1)	dimethyladenosine transferase
63	AT1G01900	(SBTI1.1)	Encodes AtSBT1.1, a subtilisin-like serine protease. Cleaves the phytosulfokine AtPSK4, a growth promoting peptide.
64	AT1G01920		SET domain-containing protein
65	AT1G01940		Cyclophilin-like peptidyl-prolyl cis-trans isomerase family protein
66	AT1G01980	(ATBBE1)	Encodes an oligogalacturonide oxidase that inactivates the elicitor-active oligogalacturonides (OGs).
67	AT1G02020		nitroreductase family protein
68	AT1G02050	LESS ADHESIVE POLLEN 6 (LAP6)	Chalcone and stilbene synthase family protein
69	AT1G02060		Tetratricopeptide repeat (TPR)-like superfamily protein
70	AT1G02070		zinc ion-binding protein
71	AT1G02100	SUPPRESSOR OF BRI1 (SBI1)	Leucine carboxyl methyltransferase
72	AT1G02120	VASCULAR ASSOCIATED DEATH1 (VAD1)	Encodes VAD1 (Vascular Associated Death1), a regulator of cell death and defense responses in vascular tissues. VAD1 is a putative membrane associated protein and contains a GRAM domain. vad1 is a lesion mimic mutant that exhibits light conditional appearance of propagative HR (hypersensitive response)-like lesions along the vascular system. The mRNA is cell-to-cell mobile.
73	AT1G02180		ferredoxin-like protein
74	AT1G02190	ECERIFERUM1-LIKE1 (CER1-L1)	Fatty acid hydroxylase superfamily
75	AT1G02200
76	AT1G02205	ECERIFERUM 1 (CER1)	Expression of the CER1 gene associated with production of stem epicuticular wax and pollen fertility. Biochemical studies showed that cer1 mutants are blocked in the conversion of stem wax C30 aldehydes to C29 alkanes, and they also lack the secondary alcohols and ketones. These suggested the CER1 protein is an aldehyde decarbonylase, but the exact molecular function of this protein remains to be…
77	AT1G02220	NAC DOMAIN CONTAINING PROTEIN 3 (NAC003)	NAC domain transcription factor which functions as a negative regulator of the TDIF-PXY module and fine-tunes TDIF signaling in vascular development. Controls the balance of xylem formation and cambial cell divisions.
78	AT1G02230	NAC DOMAIN CONTAINING PROTEIN 4 (NAC004)	NAC domain containing protein 4
79	AT1G02250	NAC DOMAIN CONTAINING PROTEIN 5 (NAC005)	Encodes a member of the NAC family of transcription factors. ANAC005 contains sequences specifying both nuclear and plasma membrane targeting. Overexpression results in increased xylem differentiation suggesting ANAC005 promotes xylem formation.
80	AT1G02260		Divalent ion symporter
81	AT1G02280	TRANSLOCON AT THE OUTER ENVELOPE MEMBRANE OF CHLOROPLASTS 33 (TOC33)	Encodes a GTP-binding GTP-ase. Component of the chloroplast protein import machinery. Required for import of POR B into plastids. Toc33 phosphorylation may not play an important role in vivo.
82	AT1G02300	(ATCATHB1)	Encodes a capase involved in stress induced cell death.
83	AT1G02310	ENDO-BETA-MANNANASE 1 (MAN1)	Glycosyl hydrolase superfamily protein
84	AT1G02320		hypothetical protein
85	AT1G02330	COP1 SUPPRESSOR 2 (CSU2)	Encodes a nuclear coiled-coil domain-containing protein that interacts with and negatively regulates COP1's E3 ubiquitin ligase activity, and represses COP1 mediated HY5 degradation in cell-free extracts.
86	AT1G02340	LONG HYPOCOTYL IN FAR-RED (HFR1)	Encodes a light-inducible, nuclear bHLH protein involved in phytochrome signaling. Mutants exhibit a long-hypocotyl phenotype only under far-red light but not under red light and are defective in other phytochrome A-related responses. Mutants also show blue light response defects. HFR1 interacts with COP1, co-localizes to the nuclear specks and is ubiquinated by COP1.
87	AT1G02360		Chitinase family protein
88	AT1G02370		Tetratricopeptide repeat (TPR)-like superfamily protein
89	AT1G02390	GLYCEROL-3-PHOSPHATE SN-2-ACYLTRANSFERASE 2 (GPAT2)	putative sn-glycerol-3-phosphate 2-O-acyltransferase
90	AT1G02400	GIBBERELLIN 2-OXIDASE 6 (GA2OX6)	Encodes a gibberellin 2-oxidase that acts on C19 gibberellins but not C20 gibberellins.
91	AT1G02420		Pentatricopeptide repeat (PPR) superfamily protein
92	AT1G02430	ADP-RIBOSYLATION FACTOR D1B (ARFD1B)	A member of ARF GTPase family. A thaliana has 21 members of this family, known to be essential for vesicle coating and uncoating and functions in GTP-binding. Gene encoding ADP-ribosylation factor and similar to other ARFs and ARF-like proteins.
93	AT1G02450	NIM1-INTERACTING 1 (NIMIN1)	NIMIN1 modulates PR gene expression according the following model: NPR1 forms a ternary complex with NIMIN1 and TGA factors upon SAR induction that binds to a positive regulatory cis-element of the PR-1 promoter, termed LS7. This leads to PR-1 gene induction. NIMIN1 decreases transcriptional activation, possibly through its EAR motif, which results in fine-tuning of PR-1 gene expression.
94	AT1G02460		Pectin lyase-like superfamily protein
95	AT1G02470		Polyketide cyclase/dehydrase and lipid transport superfamily protein
96	AT1G02490		hypothetical protein
97	AT1G02530	ATP-BINDING CASSETTE B12 (ABCB12)	P-glycoprotein 12
98	AT1G02540		hypothetical protein
99	AT1G02550		Plant invertase/pectin methylesterase inhibitor superfamily protein
100	AT1G02560	NUCLEAR ENCODED CLP PROTEASE 5 (CLPP5)	One of several nuclear-encoded ClpPs (caseinolytic protease). Contains a highly conserved catalytic triad of Ser-type proteases (Ser-His-Asp). The name reflects nomenclature described in Adam et. al (2001). The mRNA is cell-to-cell mobile.
101	AT1G02570		transmembrane protein
102	AT1G02580	MEDEA (MEA)	Encodes the imprinted gene MEA that belongs to Polycomb Repressive Complex 2 (PRC2) and has a SET domain for methyltransferase activity and is involved in the stable transcriptional silencing of target genes. It negatively regulates seed development in the absence of fertilization. Mutations in this locus result in embryo lethality. MEA is imprinted in the endosperm. The maternal allele is expres…
103	AT1G02640	BETA-XYLOSIDASE 2 (BXL2)	encodes a protein similar to a beta-xylosidase located in the extracellular matrix. This is a member of glycosyl hydrolase family 3 and has six other closely related members.
104	AT1G02660	PLASTID LIPASE2 (PLIP2)	PLIP2 is a glycerolipid A1 lipase with substrate preference for monogalactosyldiacylglycerol. Expression is induced by ABA.
105	AT1G02670		P-loop containing nucleoside triphosphate hydrolases superfamily protein
106	AT1G02680	TBP-ASSOCIATED FACTOR 13 (TAF13)	Encodes a TBP-Associated Factor (TAF) that functions together with PRC2 in transcriptional regulation during seed development.
107	AT1G02700		GATA transcription factor-like protein
108	AT1G02710		glycine-rich protein
109	AT1G02720	GALACTURONOSYLTRANSFERASE-LIKE 5 (GATL5)	Encodes a protein with putative galacturonosyltransferase activity.
110	AT1G02730	CELLULOSE SYNTHASE-LIKE D5 (CSLD5)	Encodes a gene similar to cellulose synthase. Knock-out mutant has reduced growth, reduced xylan level and reduced xylan synthase activity in stems.It's expression is cell cycle dependent and it appears to function in cell plate formation.
111	AT1G02740	MORF RELATED GENE 2 (MRG2)	MRG1 and MRG2 proteins act as readers of H3K4me3/H3K36me3 marked chromatin. They interact with each other as well as several other protein classes, to modulate the activity of flowering genes.
112	AT1G02750	(DIL-2)	Drought-responsive family protein
113	AT1G02790	POLYGALACTURONASE 4 (PGA4)	encodes a exopolygalacturonase.
114	AT1G02800	CELLULASE 2 (CEL2)	Encodes a protein with similarity to endo-1,4-b-glucanases and is a member of Glycoside Hydrolase Family 9. CEL2 is induced by nemotodes and is expressed in syncitia induced by Heterodera schachtii.May be involved in the development and function of syncitia.
115	AT1G02810		Plant invertase/pectin methylesterase inhibitor superfamily
116	AT1G02816		pectinesterase (Protein of unknown function, DUF538)
117	AT1G02820	LATE EMBRYOGENESIS ABUNDANT 3 (LEA3)	Late embryogenesis abundant 3 (LEA3) family protein
118	AT1G02830		Ribosomal L22e protein family
119	AT1G02840	SERINE/ARGININE-RICH PROTEIN SPLICING FACTOR 34 (SR34)	SR34/SR1 is a plant homologue of the human general/alternative splicing factor SF2/ASF. Barta et al (2010) have proposed a nomenclature for Serine/Arginine-Rich Protein Splicing Factors (SR proteins): Plant Cell. 2010, 22:2926.
120	AT1G02850	BETA GLUCOSIDASE 11 (BGLU11)	beta glucosidase 11
121	AT1G02860	NITROGEN LIMITATION ADAPTATION (NLA)	Encodes a ubiquitin E3 ligase with RING and SPX domains that is involved in mediating immune responses and mediates degradation of PHT1s at plasma membranes. Targeted by MIR827. Ubiquitinates PHT1;3, PHT1;2, PHT1;1/AtPT1 and PHT1;4/AtPT2.
122	AT1G02870		nucleolar-like protein
123	AT1G02900	RAPID ALKALINIZATION FACTOR 1 (RALF1)	Member of a diversely expressed predicted peptide family showing sequence similarity to tobacco Rapid Alkalinization Factor (RALF), and is believed to play an essential role in the physiology of Arabidopsis. Consists of a single exon and is characterized by a conserved C-terminal motif and N-terminal signal peptide. Mediates Ca2+-dependent signaling. Regulates the splicing of flowering genes and …
124	AT1G02910	LOW PSII ACCUMULATION1 (LPA1)	Mutants defective in this gene were shown to have a reduced PSII content (overall reduction in the levels of several PSII subunits) and a disrupted grana stack structure. The N-terminal half of the protein contains two tetratricopeptide repeat (TPR) motifs that are arranged tandemly, each consisting of a 34-residue degenerate consensus sequence. The N-terminal sequence is rich in positive and hyd…
125	AT1G02930	GLUTATHIONE S-TRANSFERASE 6 (GSTF6)	Encodes glutathione transferase belonging to the phi class of GSTs. Naming convention according to Wagner et al. (2002).
126	AT1G02940	GLUTATHIONE S-TRANSFERASE (CLASS PHI) 5 (GSTF5)	Encodes glutathione transferase belonging to the phi class of GSTs. Naming convention according to Wagner et al. (2002).
127	AT1G02950	GLUTATHIONE S-TRANSFERASE F4 (GSTF4)	Encodes glutathione transferase belonging to the phi class of GSTs. Naming convention according to Wagner et al. (2002).
128	AT1G02960		kinetochore protein
129	AT1G02980	CULLIN 2 (CUL2)	encodes an Arabidopsis cullin
130	AT1G03010		Phototropic-responsive NPH3 family protein
131	AT1G03020	(GRXS1)	Encodes a member of the CC-type glutaredoxin (ROXY) family that has been shown to interact with the transcription factor TGA2.
132	AT1G03030		P-loop containing nucleoside triphosphate hydrolases superfamily protein
133	AT1G03050	PHOSPHATIDYLINOSITOL BINDING CLATHRIN ASSEMBLY PROTEIN 5A (PICALM5A)	Phosphatidylinositol binding clathrin assembly protein 5A/B are recent paralogs with overlapping functions in recycling ANXUR proteins to the pollen tube membrane.
134	AT1G03055	DWARF27 (D27)	Encodes the ortholog of rice D27. It is plastid-localized and is required for the inhibition of secondary bud outgrowth and operates on a nonmobile precursor upstream of MAX1 in the SL biosynthesis pathway.
135	AT1G03060	SPIRRIG (SPI)	Encodes a WD/BEACH domain protein involved in cell morphogenesis and ribonucleoprotein particle formation. It interacts with the P-body core component DCP2, associates to mRNA processing bodies (P-bodies), and regulates their assembly upon salt stress. It accumulates at the root hair apex via post-Golgi compartments and positively regulates tip growth by maintaining tip-focused vesicle secretion …
136	AT1G03070	LIFEGUARD 4 (LFG4)	Bax inhibitor-1 family protein
137	AT1G03080	NETWORKED 1D (NET1D)	kinase interacting (KIP1-like) family protein
138	AT1G03100		Pentatricopeptide repeat (PPR) superfamily protein
139	AT1G03130	PHOTOSYSTEM I SUBUNIT D-2 (PSAD-2)	Encodes a protein predicted by sequence similarity with spinach PsaD to be photosystem I reaction center subunit II (PsaD2)
140	AT1G03140	PRE-MRNA PROCESSING FACTOR 18A (PRP18A)	PRP18a is one of two paralogs (the other being PRP18b) which are highly similar to the step II splicing factors in yeast. Loss of function mutations show defects in alternative splicing, mostly intron retention events.
141	AT1G03170	FANTASTIC FOUR 2 (FAF2)	A member of the FAF family proteins encoded by the FANTASTIC FOUR (FAF) genes: AT4G02810 (FAF1), AT1G03170 (FAF2), AT5G19260 (FAF3) and AT3G06020 (FAF4). FAFs have the potential to regulate shoot meristem size in Arabidopsis thaliana. FAFs can repress WUS, which ultimately leads to an arrest of meristem activity in FAF overexpressing lines.
142	AT1G03180	(COMET)	Functions in chromosome axis remodeling and synapsis along with co factors PCH2 and ASY1.Required for chiasma formation.
143	AT1G03190	ULTRAVIOLET HYPERSENSITIVE 6 (UVH6)	UV damage and heat induce a common stress response in plants that leads to tissue death and reduced chloroplast function. The UVH6 product is suggested to be a negative regulator of this response.
144	AT1G03210		Phenazine biosynthesis PhzC/PhzF protein
145	AT1G03220	SECRETED ASPARTIC PROTEASE 2 (SAP2)	Eukaryotic aspartyl protease family protein
146	AT1G03240		hypothetical protein
147	AT1G03270		CBS domain protein with a domain protein (DUF21)
148	AT1G03290		ELKS/Rab6-interacting/CAST family protein
149	AT1G03300	DOMAIN OF UNKNOWN FUNCTION 724 1 (ATDUF1)	Member of the plant-specific DUF724 protein family. Arabidopsis has 10 DUF724 proteins. Loss of function mutant has a WT phenotype
150	AT1G03320		hypothetical protein
151	AT1G03360	RIBOSOMAL RNA PROCESSING 4 (RRP4)	Encodes a core subunit of the RNA exosome required for the processing of rRNA, several snoRNA and the degradation of aberrant transcripts.
152	AT1G03370		C2 calcium/lipid-binding and GRAM domain containing protein
153	AT1G03390		HXXXD-type acyl-transferase family protein
154	AT1G03400		A single copy gene that encodes a protein with sequence similarity to tomato E8 (ACC oxidase, the last step in ethylene biosynthesis) involved in ethylene synthesis and fruit ripening in tomato. This gene is not induced by ethylene in siliques. The transcript is found in siliques, etiolated seedlings, leaves, stems and flowers.
155	AT1G03410	(2A6)	2-oxoglutarate (2OG) and Fe(II)-dependent oxygenase superfamily protein
156	AT1G03420	SADHU NON-CODING RETROTRANSPOSON 4-2 (Sadhu4-2)	Member of Sadhu non-coding retrotransposon family
157	AT1G03430	HISTIDINE-CONTAINING PHOSPHOTRANSFER FACTOR 5 (AHP5)	Encodes AHP5, one of the six Arabidopsis thaliana histidine phosphotransfer proteins (AHPs). AHPs function as redundant positive regulators of cytokinin signaling. Members of the AHP gene family include: AT3G21510 (AHP1), AT3G29350 (AHP2), AT5G39340 (AHP3), AT3G16360 (AHP4), AT1G03430 (AHP5) and AT1G80100 (AHP6).
158	AT1G03440		Leucine-rich repeat (LRR) family protein
159	AT1G03445	BRI1 SUPPRESSOR 1 (BSU1)	encodes a serine?threonine protein phosphatase with an N-terminal Kelch-repeat domain, which is nuclear localized and expressed preferentially in elongating cells. Genetic evidence suggest that this gene plays a redundant role (along with other members of the same gene family) in modulating growth in response to brassinosteroid.
160	AT1G03457	BRUNO-LIKE 2 (BRN2)	RNA-binding (RRM/RBD/RNP motifs) family protein
161	AT1G03475	LESION INITIATION 2 (LIN2)	Encodes coproporphyrinogen III oxidase, a key enzyme in the biosynthetic pathway of chlorophyll and heme, a tetrapyrrole pathway. Mutants express cytological and molecular markers associated with the defense responses, usually activated by pathogen infection.
162	AT1G03490	NAC DOMAIN CONTAINING PROTEIN 6 (NAC006)	NAC domain containing protein 6
163	AT1G03495		HXXXD-type acyl-transferase family protein
164	AT1G03530	NUCLEAR ASSEMBLY FACTOR 1 (NAF1)	nuclear assembly factor 1
165	AT1G03540		Pentatricopeptide repeat (PPR-like) superfamily protein
166	AT1G03550	SECRETORY CARRIER MEMBRANE PROTEIN 4 (SCAMP4)	Secretory carrier membrane protein (SCAMP) family protein
167	AT1G03560		Pentatricopeptide repeat (PPR-like) superfamily protein
168	AT1G03590		Protein phosphatase 2C family protein
169	AT1G03600	(PSB27)	PSB27 is a chloroplast lumen localized protein that is involved in adaptation to changes in light intensity.
170	AT1G03610		plant/protein (DUF789)
171	AT1G03620	(ELMOD_F)	Member of the ELMOD family.
172	AT1G03630	PROTOCHLOROPHYLLIDE OXIDOREDUCTASE C (POR C)	Encodes for a protein with protochlorophyllide oxidoreductase activity. The enzyme is NADPH- and light-dependent.
173	AT1G03660		Ankyrin-repeat containing protein
174	AT1G03675
175	AT1G03687		DTW domain-containing protein
176	AT1G03700	CASP-LIKE PROTEIN 1C2 (CASPL1C2)	Uncharacterized protein family (UPF0497)
177	AT1G03710		Cystatin/monellin superfamily protein
178	AT1G03720		Cysteine proteinases superfamily protein
179	AT1G03760		Prefoldin chaperone subunit family protein
180	AT1G03770	RING 1B (RING1B)	Encodes a nuclear localized protein with similarity to animal polycomb repressive core complex1 (PRC1) core component RING.Appears to function redundantly with ATRING1a, a close paralog. Both interact physically with CLF and LHP1 and appear to function together to repress class I KNOX gene expression.
181	AT1G03780	TARGETING PROTEIN FOR XKLP2 (TPX2)	Homolog of vertebrate TPX2. Protein has three domains involved in nuclear targeting, one in nuclear export and two in microtubule binding. Involved in mitotic spindle assembly during late prophase and early prometaphase.
182	AT1G03790	SOMNUS (SOM)	Encodes SOMNUS (SOM), a nucleus-localized CCCH-type zinc finger protein. SOM negatively regulates light-dependent seed germination downstream of PIL5 (AT2G20180).
183	AT1G03820		E6-like protein
184	AT1G03840	MAGPIE (MGP)	MGP is a nuclear-localized putative transcription factor with three zinc finger domains. MGP can interact with three proteins implicated in root patterning: SCR, SHR, and JKD in Y2H assays, and these interactions depend on the first zinc finger in MGP. MGP appears to be a direct transcriptional target of SHR and SCR, based on promoter binding assays, though it is not expressed in the QC, based on…
185	AT1G03850	GLUTAREDOXIN 13 (GRXS13)	Encodes glutaredoxin ATGRXS13, required to facilitate Botrytis cinerea infection of Arabidopsis thaliana plants. Sylvain La Camera et al (2011, PMID:21756272) reported a third splice variant in addition to the two annotated in TAIR10. It is a member of the CC-type glutaredoxin (ROXY) family that has been shown to interact with the transcription factor TGA2 and suppress ORA59 promoter activity.
186	AT1G03860	PROHIBITIN 2 (PHB2)	prohibitin 2
187	AT1G03870	FASCICLIN-LIKE ARABINOOGALACTAN 9 (FLA9)	fasciclin-like arabinogalactan-protein 9 (Fla9). Possibly involved in embryogenesis and seed development.
188	AT1G03880	CRUCIFERIN 2 (CRU2)	Protein is tyrosine-phosphorylated and its phosphorylation state is modulated in response to ABA in Arabidopsis thaliana seeds.
189	AT1G03890		RmlC-like cupins superfamily protein
190	AT1G03900	ATP-BINDING CASSETTE I18 (ABCI18)	member of NAP family, an heterogeneous subfamily of the ATP-binding Cassette (ABC) superfamily of membrane transporters. The NAPs proteins are characterized by having only one nucleotide-binding folds (NBFs) domain.
191	AT1G03920	NUCLEAR DBF2-RELATED 2 (NDR2)	Ubiquitously expressed protein kinase.
192	AT1G03930	DUAL SPECIFICITY KINASE 1 (ADK1)	Phosphorylates serine, threonine, and tyrosine
193	AT1G03950	VACUOLAR PROTEIN SORTING-ASSOCIATED PROTEIN 2.3 (VPS2.3)	vacuolar protein sorting-associated protein 2.3
194	AT1G03960		Calcium-binding EF hand family protein
195	AT1G03970	G-BOX BINDING FACTOR 4 (GBF4)	encodes a basic leucine zipper G-box binding factor that can bind to G-box motifs only as heterodimers with GBF2 or GBF3. A single amino acid change can confer G-box binding as homodimers.
196	AT1G03980	PHYTOCHELATIN SYNTHASE 2 (PCS2)	Encodes a protein with phytochelatin synthase activity which binds Cd2+ and Cd-glutathione complexes with high affinity. The protein has been postulated to be involved in Cd2+ tolerance. AtPCS2 expression appears to be less than that of AtPCS1, explaining the inability of endogenous AtPCS2 to substitute for AtPCS1 in the cad1-3 mutant (AtPCS1 null).
197	AT1G03990		Long-chain fatty alcohol dehydrogenase family protein
198	AT1G04000		hypothetical protein
199	AT1G04020	BREAST CANCER ASSOCIATED RING 1 (BARD1)	Encodes a protein containing two tandem BRCA1 C-Terminal (BRCT) domains, which function in phosphorylation-dependent protein-protein interactions. Loss of function mutations cause defects in meristem organization due to failure to repress WUS. BARD1 binds to WUS promoter and over expression of BARD reduces the extent of WUS expression.
200	AT1G04030		eisosome protein
201	AT1G04040		HAD superfamily, subfamily IIIB acid phosphatase
202	AT1G04050	HOMOLOG OF SU(VAR)3-9 1 (SUVR1)	Encodes SUVR1, one of the four closely related Arabidopsis SUVR proteins that belong to the SU(VAR)3-9 subgroup of SET-domain proteins. Proteins containing the evolutionarily conserved SET domain are involved in regulation of eukaryotic gene expression and chromatin structure through their histone lysine methyltransferase (HMTase) activity. SUVR1, SUVR2 and SUVR4 proteins contain a novel domain a…
203	AT1G04060
204	AT1G04090		vacuolar sorting-associated protein (DUF946)
205	AT1G04110	STOMATAL DENSITY AND DISTRIBUTION 1 (SDD1)	Initially identified as a mutation affecting stomatal development and distribution. Encodes a protein similar to serine proteases.
206	AT1G04120	ATP-BINDING CASSETTE C5 (ABCC5)	encodes a high-affinity inositol hexakisphosphate transporter that plays a role in guard cell signaling and phytate storage. It is a member of MRP subfamily / ABC transporter subfamily C.
207	AT1G04130	TETRATRICOPEPTIDE REPEAT 2 (TPR2)	Encodes one of the 36 carboxylate clamp (CC)-tetratricopeptide repeat (TPR) proteins (Prasad 2010, Pubmed ID: 20856808). Interacts with Hsp90/Hsp70 as co-chaperone.
208	AT1G04150	MULTIPLE C2 DOMAIN AND TRANSMEMBRANE REGION PROTEIN 10 (MCTP10)	C2 calcium/lipid-binding plant phosphoribosyltransferase family protein
209	AT1G04160	MYOSIN XI B (XIB)	Encodes a member of the type XI myosin protein family involved in root hair elongation.
210	AT1G04180	YUCCA 9 (YUC9)	YUCCA 9
211	AT1G04200		dyggve-melchior-clausen syndrome protein
212	AT1G04220	3-KETOACYL-COA SYNTHASE 2 (KCS2)	Encodes KCS2, a member of the 3-ketoacyl-CoA synthase family involved in the biosynthesis of VLCFA (very long chain fatty acids).
213	AT1G04240	SHORT HYPOCOTYL 2 (SHY2)	SHY2/IAA3 regulates multiple auxin responses in roots. It is induced rapidly by IAA, and has been shown to be phosphorylated by oat phytochrome A in vitro.
214	AT1G04250	AUXIN RESISTANT 3 (AXR3)	Transcription regulator acting as repressor of auxin-inducible gene expression. Auxin-inducible AUX/IAA gene. Short-lived nuclear protein with four conserved domains. Domain III has homology to beta alpha alpha dimerization and DNA binding domains. Involved in auxin signaling and is a positive modulator of natural leaf senescence. Auxin induces the degradation of the protein in a dosage-dependent…
215	AT1G04310	ETHYLENE RESPONSE SENSOR 2 (ERS2)	encodes an ethylene receptor related to bacterial two-component histidine kinases.
216	AT1G04330	(PH2)	A proline/serine rich protein of unknown function. It interacts with defense related MAP kinase MPK6 and others. May be involved in signaling during defense or stress response.
217	AT1G04350		encodes a protein whose sequence is similar to 2-oxoglutarate-dependent dioxygenase
218	AT1G04360	ARABIDOPSIS TOXICOS EN LEVADURA 1 (ATL1)	RING/U-box superfamily protein
219	AT1G04380		encodes a protein similar to a 2-oxoglutarate-dependent dioxygenase
220	AT1G04390		BTB/POZ domain-containing protein
221	AT1G04420		NAD(P)-linked oxidoreductase superfamily protein
222	AT1G04430		S-adenosyl-L-methionine-dependent methyltransferases superfamily protein
223	AT1G04440	CASEIN KINASE LIKE 13 (CKL13)	Member of CKL gene family (CKL-C group).
224	AT1G04470		hypothetical protein (DUF810)
225	AT1G04490		hypothetical protein (DUF3527)
226	AT1G04500		CCT motif family protein
227	AT1G04510	MOS4-ASSOCIATED COMPLEX 3A (MAC3A)	Encodes MAC3A, a U-box proteins with homology to the yeast and human E3 ubiquitin ligase Prp19. Associated with the MOS4-Associated Complex (MAC). Involved in plant innate immunity. Regulator of flowering time.
228	AT1G04540		Calcium-dependent lipid-binding (CaLB domain) family protein
229	AT1G04550	INDOLE-3-ACETIC ACID INDUCIBLE 12 (IAA12)	IAA12/BDL plays a role in auxin-mediated processes of apical-basal patterning in the embryo. bdl mutants lack a primary root meristem
230	AT1G04560		AWPM-19-like family protein
231	AT1G04580	ALDEHYDE OXIDASE 4 (AO4)	Encodes aldehyde oxidase AAO4 preferentially expressed in developing seeds.
232	AT1G04590		PPR containing-like protein
233	AT1G04600	MYOSIN XI A (XIA)	member of Myosin-like proteins
234	AT1G04610	YUCCA 3 (YUC3)	Encodes a member of the YUC family that is expressed in the root apex and is ethylene inducible in the root.
235	AT1G04620	7-HYDROXYMETHYL CHLOROPHYLL A (HMCHL) REDUCTASE (HCAR)	Encodes a 7-hydroxymethyl chlorophyll a reductase, an enzyme of the chlorophyll cycle that converts 7-hydroxymethyl chlorophyll a to chlorophyll a.
236	AT1G04630	MATERNAL EFFECT EMBRYO ARREST 4 (MEE4)	GRIM-19 protein
237	AT1G04640	LIPOYLTRANSFERASE 2 (LIP2)	Lipoyltransferase, located in mitochondria but not found in chloroplasts
238	AT1G04645		Plant self-incompatibility protein S1 family
239	AT1G04660		glycine-rich protein
240	AT1G04670		hypothetical protein
241	AT1G04680		Pectin lyase-like superfamily protein
242	AT1G04700		PB1 domain-containing protein tyrosine kinase
243	AT1G04710	PEROXISOMAL 3-KETOACYL-COA THIOLASE 4 (PKT4)	EC2.3.1.16 thiolase. Its transcript levels change after inducing MUTE expression in a mute background.
244	AT1G04730	CHROMOSOME TRANSMISSION FIDELITY 18 (CTF18)	Necessary for sister chromatid cohesion. Acts in synergy with ETG1.
245	AT1G04760	VESICLE-ASSOCIATED MEMBRANE PROTEIN 726 (VAMP726)	member of Synaptobrevin -like protein family
246	AT1G04770	SULFUR DEFICIENCY INDUCED 2 (SDI2)	SDI2 is a member of a small family of TPR proteins in Arabidopsis. Like SDI1 it is induced by low sulfer and appears to play a role in negative regulation of glucosinolate biosynthesis.
247	AT1G04790		RING/U-box superfamily protein
248	AT1G04800		glycine-rich protein
249	AT1G04810		26S proteasome regulatory complex, non-ATPase subcomplex, Rpn2/Psmd1 subunit
250	AT1G04840		Tetratricopeptide repeat (TPR)-like superfamily protein
251	AT1G04870	PROTEIN ARGININE METHYLTRANSFERASE 10 (PRMT10)	Encodes a type I protein arginine methyltransferase based on the At1g04870.2 gene model. PRMT10 can catalyze the asymmetric dimethylation of arginine 3 on histone 4 and can also methylate myelin basic protein in vitro. Mutants lacking PRMT10 flower late due to defects in the autonomous pathway and they have elevated levels of FLC transcripts.
252	AT1G04880	ARID-HMG DNA-BINDING PROTEIN 15 (HMGBD15)	Encodes a ARID-HMG DNA-binding protein that functions in pollen tube growth through the regulation of gene expression by interacting with the transcription factors AGL66 and AGL104.
253	AT1G04900		NADH dehydrogenase ubiquinone complex I, assembly factor-like protein (DUF185)
254	AT1G04910		O-fucosyltransferase family protein
255	AT1G04920	SUCROSE PHOSPHATE SYNTHASE 3F (SPS3F)	Encodes a sucrose-phosphate synthase whose activity is stimulated by Glc-6-P and inhibited by Pi.
256	AT1G04930	LIN37 HOMOLOG A (LIN37A)	Member of the DREAM complex, which represses growth in response to DNA damage, LIN37 type.
257	AT1G04940	TRANSLOCON AT THE INNER ENVELOPE MEMBRANE OF CHLOROPLASTS 20-I (Tic20-I)	Tic20 is believed to function as a component of the protein-conducting channel at the inner envelope membrane. Genes AT1G04940 and AT1G04945 were switched for the TAIR7 genome release to give consistency with MIPs annotation. The Arabidopsis genome encodes four Tic20 homologous proteins, AT1G04940(Tic20-I), AT2G47840(Tic20-II), AT4G03320(Tic20-IV) and AT5G55710(Tic20-V).
258	AT1G04980	PDI-LIKE 2-2 (PDIL2-2)	Encodes a protein disulfide isomerase-like (PDIL) protein, a member of a multigene family within the thioredoxin (TRX) superfamily. Transcript levels for this gene are up-regulated in response to three different chemical inducers of ER stress (dithiothreitol, beta-mercaptoethanol, and tunicamycin). AtIRE1-2 does not appear to be required for this response, but the atbzip60 mutant has a diminished…
259	AT1G04990		Zinc finger C-x8-C-x5-C-x3-H type family protein
260	AT1G05000	PLANT AND FUNGI ATYPICAL DUAL-SPECI&#64257;CITY PHOSPHATASE 1 (PFA-DSP1)	Encodes an atypical dual-speci&#64257;city phosphatase.
261	AT1G05010	ETHYLENE-FORMING ENZYME (EFE)	Encodes 1-aminocyclopropane-1-carboxylate oxidase
262	AT1G05020	ANTH PROTEIN 180 (AP180)	ENTH/ANTH/VHS superfamily protein
263	AT1G05040		UBA-like domain protein
264	AT1G05060		coiled-coil protein
265	AT1G05090		dentin sialophosphoprotein-like protein
266	AT1G05100	MITOGEN-ACTIVATED PROTEIN KINASE KINASE KINASE 18 (MAPKKK18)	member of MEKK subfamily. Negatively regulated by RGLG1 and RGLG2; involved in drought stress tolerance.
267	AT1G05120		Helicase protein with RING/U-box domain-containing protein
268	AT1G05130
269	AT1G05140		Peptidase M50 family protein
270	AT1G05150		Calcium-binding tetratricopeptide family protein
271	AT1G05160	CYTOCHROME P450, FAMILY 88, SUBFAMILY A, POLYPEPTIDE 3 (CYP88A3)	Encodes an ent-kaurenoic acid hydroxylase, a member of the CYP88A cytochrome p450 family.
272	AT1G05170		Galactosyltransferase family protein
273	AT1G05180	AUXIN RESISTANT 1 (AXR1)	Encodes a subunit of the RUB1 activating enzyme that regulates the protein degradation activity of Skp1-Cullin-Fbox complexes, primarily, but not exclusively, affecting auxin responses. Acts alongside AS1 to exclude BP expression from leaves. Promotes degradation of the cytokinin response repressor ARR5. Affects expression of key DNA repair and meiotic genes, signifcant role in DNA repair.
274	AT1G05190	EMBRYO DEFECTIVE 2394 (emb2394)	Encodes the plastid 50S ribosomal protein L6.
275	AT1G05200	GLUTAMATE RECEPTOR 3.4 (GLR3.4)	Encodes a putative glutamate receptor GLR3 with dual localization in plastid and plasma membrane.
276	AT1G05210		Transmembrane protein 97, Putative
277	AT1G05230	HOMEODOMAIN GLABROUS 2 (HDG2)	Encodes a homeobox-leucine zipper family protein belonging to the HD-ZIP IV family. Mutants have trichomes that appear glass-like under a dissecting microscope as compared to the wild-type trichomes. The mutations do not affect trichome growth or branch number.
278	AT1G05250	PEROXIDASE 2 (PRX2)	Encodes a cationic cell-wall-bound peroxidase homolog that is involved in the lignification of cell walls. Regulated by COG1, involved in seed longevity.
279	AT1G05260	RARE COLD INDUCIBLE GENE 3 (RCI3)	Encodes a cold-inducible cationic peroxidase that is involved in the stress response. In response to low temperature, RCI3 transcripts accumulate in the aerial part and in roots of etiolated seedlings but only in roots of light-grown seedlings. The mRNA is cell-to-cell mobile.
280	AT1G05270		TraB family protein
281	AT1G05280		ERV-F (C)1 provirus ancestral Env polyprotein, putative (DUF604)
282	AT1G05290	ORBITALLY MANIFESTED GENE 1 (OMG1)	Member of the CONSTANS-Like protein family which is a putative regulator of reactive oxygen species homeostasis.
283	AT1G05300	ZINC TRANSPORTER 5 PRECURSOR (ZIP5)	member of Fe(II) transporter isolog family
284	AT1G05310		Pectin lyase-like superfamily protein
285	AT1G05320	PICC-LIKE (PICL)	myosin heavy chain, embryonic smooth protein
286	AT1G05330		hypothetical protein
287	AT1G05340	CYSTEINE-RICH TRANSMEMBRANE MODULE 1 (ATHCYSTM1)	cysteine-rich TM module stress tolerance protein
288	AT1G05350		NAD(P)-binding Rossmann-fold superfamily protein
289	AT1G05360	KILLING ME SLOWLY 2 (KMS2)	KMS2 encode a endoplasmic reticulum protein involved in the early secretory pathway.
290	AT1G05370		Sec14p-like phosphatidylinositol transfer family protein
291	AT1G05385	LOW PSII ACCUMULATION 19 (LPA19)	Encodes a Psb27 homolog involved in photosystem II biogenesis.
292	AT1G05400		hypothetical protein
293	AT1G05440		C-8 sterol isomerase
294	AT1G05450		Encodes a Protease inhibitor/seed storage/LTP family protein
295	AT1G05460	SILENCING DEFECTIVE (SDE3)	Encodes a protein with similarity to RNA helicases. Mutants are defective in post-transcriptional gene silencing.
296	AT1G05470	COTYLEDON VASCULAR PATTERN 2 (CVP2)	Encodes an inositol polyphosphate 5' phosphatase (5PTase) that is required for the proper recruitment of cells into developing vascular tissue in leaves and cotyledons. It is most similar to Type I 5PTases that are known to cleave a phosphate from IP3 or IP4. cvp2 mutants have elevated levels of IP3 and are hypersensitive to ABA in seed germination assays.
297	AT1G05480
298	AT1G05490	CHROMATIN REMODELING 31 (chr31)	Involved in gene silencing. Locus-specific regulator of 24nt-siRNA expression, works together with CLSY1-4 as the master regulators of essentially all Pol-IV-dependent 24nt-siRNAs.
299	AT1G05510	OIL BODY-ASSOCIATED PROTEIN 1A (OBAP1A)	Protein is tyrosine-phosphorylated and its phosphorylation state is modulated in response to ABA in Arabidopsis thaliana seeds.
300	AT1G05530	UDP-GLUCOSYL TRANSFERASE 75B2 (UGT75B2)	Encodes a protein with glucosyltransferase activity with high sequence homology to UGT1 (AT1G05560). It belongs to an UGT subfamily that binds UDP-glucose but not UDP-glucuronate, UDP-galactose, or UDP-rhamnose as the glycosyl donor. UGT2 was shown to be able to use abscisic acid as glycosylation substrate in the presence of UDP-glucose.
301	AT1G05550	DUF295 ORGANELLAR A 2 (ATDOA2)	DUF295 domain protein of unknown function. Expressed in ovule integuments and nucellus.
302	AT1G05560	UDP-GLUCOSYLTRANSFERASE 75B1 (UGT75B1)	A UDP-glucose transferase localized in the phragmoplast. It has been co-purified with the callose synthase complex and may transfer UDP-glucose from sucrose synthase to the callose synthase and thus help form a substrate channel for the synthesis of callose at the forming cell plate. Induced by salicylic acid. Independent of NPR1 for their induction by salicylic acid. UGT1 encodes a protein with …
303	AT1G05570	CALLOSE SYNTHASE 1 (CALS1)	Encodes a callose synthase 1 catalytic subunit . Member of Glycosyltransferase Family- 48.
304	AT1G05575	HYPOXIA RESPONSE UNKNOWN PROTEIN 17 (HUP17)	transmembrane protein
305	AT1G05580	CATION/H+ EXCHANGER 23 (CHX23)	member of Putative Na+/H+ antiporter family
306	AT1G05610	ADP-GLUCOSE PYROPHOSPHORYLASE SMALL SUBUNIT 2 (APS2)	Encodes the small subunit of ADP-glucose pyrophosphorylase. The small subunit is the catalytic isoform responsible for ADP-glucose pyrophosphorylase activity. The presence of the small subunit is required for large subunit stability. Two isoforms of the small subunit (ApS1 and ApS2) have been described. ApS2 is a minor small subunit isoform present in all plant tissues tested.
307	AT1G05620	URIDINE-RIBOHYDROLASE 2 (URH2)	Encodes a cytosolic inosine nucleoside hydrolase. It forms a heterocomplex with NSH1 with almost two orders of magnitude higher catalytic efficiency for xanthosine hydrolysis than observed for NSH1 alone. Transcript levels for this gene are elevated in older leaves suggesting that it may play a role in purine catabolism during senescence.
308	AT1G05630	INOSITOL-POLYPHOSPHATE 5-PHOSPHATASE 13 (5PTASE13)	Encodes an inositol polyphosphate 5-phosphatase with phosphatase activity toward only Ins(1,4,5)P3. Induced in response to ABA and wounding treatments. Expressed in young seedlings and flowers, while no transcripts were detectable in maturated roots, stems, and rosette leaves Modulates the development of cotyledon veins through its regulation of auxin homeostasis. Involved in blue light light?sti…
309	AT1G05650		Pectin lyase-like superfamily protein
310	AT1G05670		Pentatricopeptide repeat (PPR-like) superfamily protein
311	AT1G05680	URIDINE DIPHOSPHATE GLYCOSYLTRANSFERASE 74E2 (UGT74E2)	Encodes a UDP-glucosyltransferase, UGT74E2, that acts on IBA (indole-3-butyric acid) and affects auxin homeostasis. The transcript and protein levels of this enzyme are strongly induced by H2O2 and may allow integration of ROS (reactive oxygen species) and auxin signaling. This enzyme can also transfer glycosyl groups to several compounds related to the explosive TNT when this synthetic compound …
312	AT1G05690	BTB AND TAZ DOMAIN PROTEIN 3 (bt3)	BTB and TAZ domain protein. Acts redunantly with BT1 and BT2 during female gametophyte development. Acts with BT2 during male gametophyte development.
313	AT1G05700		Leucine-rich repeat transmembrane protein kinase protein
314	AT1G05710		basic helix-loop-helix (bHLH) DNA-binding superfamily protein
315	AT1G05740		FAM136A-like protein (DUF842)
316	AT1G05760	RESTRICTED TEV MOVEMENT 1 (RTM1)	Specifically restrict the long-distance movement of tobacco etch potyvirus (TEV) without involving either hypersensitive cell death or systemic acquired resistance
317	AT1G05770		Mannose-binding lectin superfamily protein
318	AT1G05800	DONGLE (DGL)	Encodes a galactolipase. Located in the chloroplast. Involved in the initial step of jasmonic acid biosynthesis. Expressed in vegetative tissues and is necessary for the biosynthesis of basal-level JAs in vegetative tissues.
319	AT1G05805	ABA-RESPONSIVE KINASE SUBSTRATE 2 (AKS2)	basic helix-loop-helix (bHLH) DNA-binding superfamily protein
320	AT1G05810	RAB GTPASE HOMOLOG A5E (RABA5E)	Rab GTPase-like A5A protein
321	AT1G05840		Eukaryotic aspartyl protease family protein
322	AT1G05850	POM-POM1 (POM1)	Encodes an endo chitinase-like protein AtCTL1. Essential for tolerance to heat, salt and drought stresses. Also involved in root hair development, cell expansion and response to cytokinin. Allelic to erh2. 11 alleles described in Hauser (1995). Mutant is defective in acquired thermotolerance, appears semidwarf throughout its life cycle and has extra lateral branches. There are two EMS alleles. Ex…
323	AT1G05880	ARIADNE 12 (ARI12)	Encodes ARI12 (ARIADNE 12). ARI12 belongs to a family of `RING between RING fingers' (RBR) domain proteins with E3 ligase activity. Expression of ARI12 is induced by UV-B exposure.
324	AT1G05890	ARIADNE 5 (ARI5)	RING/U-box superfamily protein
325	AT1G05920		B3 domain protein (DUF313)
326	AT1G05960	EFR3 OF PLANT 3 (EFOP3)	Part of a nanodomain complex that tethers PI4K&#945;1 to the plasma membrane.
327	AT1G05990	ROOT HAIR SPECIFIC 2 (RHS2)	EF hand calcium-binding protein family
328	AT1G06000	(UGT89C1)	encodes a flavonol-7-O-rhamnosyltransferase involved in the formation of rhamnosylated flavonols
329	AT1G06010		basic leucine zipper/W2 domain protein
330	AT1G06020	FRUCTOKINASE 5 (FRK5)	Encodes a member of the fructokinase gene family. Nomenclature according to Riggs 2017 has been adopted for the family by the community (personal communication, Boernke, Callis, Granot, Boernke, and Smeekens).
331	AT1G06040	SALT TOLERANCE (STO)	Encodes salt tolerance protein (STO) which confers salt tolerance to yeast cells. Fully complements calcineurin deficient yeast but does not encode a phosphoprotein phosphatase. Sequence has similarities to CONSTANS. STO co-localizes with COP1 and plays a role in light signaling.STO transcript levels are regulated by photoperiod and phtyohormones. STO competes with FLC in the regulation of floral…
332	AT1G06080	DELTA 9 DESATURASE 1 (ADS1)	Encodes a protein homologous to delta 9 acyl-lipid desaturases of cyanobacteria and acyl-CoA desaturases of yeast and mammals. expression down-regulated by cold temperature. It is involved in the desaturation of VLCFAs to make monounsaturated VLCFAs.
333	AT1G06110	SKP1/ASK-INTERACTING PROTEIN 16 (SKIP16)	SKP1/ASK-interacting protein 16
334	AT1G06120	ACYL-LIPID DESATURASE1.4 (ADS1.4)	Membrane bound acyl-lipid desaturases which can perform &#916;9 desaturation.
335	AT1G06140	MITOCHONDRIAL EDITING FACTOR 3 (MEF3)	Encodes MEF3 (mitochondrial editing factor 3), a PPR (pentatricopeptide repeat) protein of the E domain subclass. Functions in mitochondrial RNA editing.
336	AT1G06150	EMBRYO DEFECTIVE 1444 (EMB1444)	Encodes a LHW-like protein with 79% amino acid identity to LHW.
337	AT1G06160	OCTADECANOID-RESPONSIVE ARABIDOPSIS AP2/ERF 59 (ORA59)	encodes a member of the ERF (ethylene response factor) subfamily B-3 of ERF/AP2 transcription factor family. The protein contains one AP2 domain. There are 18 members in this subfamily including ATERF-1, ATERF-2, AND ATERF-5.
338	AT1G06170	BASIC HELIX LOOP HELIX PROTEIN 89 (BHLH089)	Encodes a bHLH transcription factor that together with bHLH010 and bHLH091 is important for the normal transcriptome of the developing Arabidopsis anther, possibly by forming a feed-forward loop with DYT1. Recognizes the TCATGTGC box to activate the expression of target genes, including ATA20, EXL4, and MEE48.
339	AT1G06180	MYB DOMAIN PROTEIN 13 (MYB13)	member of MYB3R- and R2R3- type MYB- encoding genes
340	AT1G06200		Peptidase S24/S26A/S26B/S26C family protein
341	AT1G06225	CLAVATA3/ESR-RELATED 3 (CLE3)	Member of a large family of putative ligands homologous to the Clavata3 gene. Consists of a single exon.
342	AT1G06230	GLOBAL TRANSCRIPTION FACTOR GROUP E4 (GTE4)	This gene is predicted to encode a bromodomain-containing protein. Plant lines expressing RNAi constructs targeted against GTE4 show some resistance to agrobacterium-mediated root transformation.
343	AT1G06260		Cysteine peptidase,activity detected in leaf and flower.
344	AT1G06270		Pentatricopeptide repeat (PPR) superfamily protein
345	AT1G06290	ACYL-COA OXIDASE 3 (ACX3)	Encodes an acyl-CoA oxidase with specificity for medium chain fatty acids. The mRNA is cell-to-cell mobile.
346	AT1G06310	ACYL-COA OXIDASE 6 (ACX6)	Encodes a putative acyl-CoA oxidase. However, no transcripts have been detected for this gene and no altered phenotypes have been detected in plants mutant for this gene. This suggests that ACX6 does not significantly contribute to seedling beta-oxidation of fatty acids or indole-3-butyric acid in vivo.
347	AT1G06320		hypothetical protein
348	AT1G06340		Plant Tudor-like protein
349	AT1G06350	DELTA 9 DESATURASE 4 (ADS4)	Fatty acid desaturase family protein
350	AT1G06380		Ribosomal protein L1p/L10e family
351	AT1G06420		DNA ligase-like protein
352	AT1G06430	FTSH PROTEASE 8 (ftsh8)	encodes a FtsH protease that is localized to the chloroplast
353	AT1G06440		Ubiquitin carboxyl-terminal hydrolase family protein
354	AT1G06450	CCR4-ASSOCIATED FACTOR 1G (CAF1G)	Deadenylase.
355	AT1G06460	ALPHA-CRYSTALLIN DOMAIN 32.1 (ACD32.1)	ACD32.1 encodes an alpha-crystallin domain containing protein with homology to small heat shock proteins.
356	AT1G06470		Nucleotide/sugar transporter family protein
357	AT1G06490	CALLOSE SYNTHASE 7 (CalS7)	Encodes Callose Synthase 7 (CalS7), a phloem-specific callose synthase responsible for callose deposition in developing sieve elements during phloem formation and in mature phloem induced by wounding.
358	AT1G06510		forkhead-associated domain protein
359	AT1G06520	GLYCEROL-3-PHOSPHATE SN-2-ACYLTRANSFERASE 1 (GPAT1)	sn-glycerol-3-phosphate 2-O-acyltransferase. Expressed in flower buds and siliques. Homozygous mutant plants are male sterile.
360	AT1G06540		hypothetical protein
361	AT1G06550		ATP-dependent caseinolytic (Clp) protease/crotonase family protein
362	AT1G06560	(NOP2C)	NOL1/NOP2/sun family protein
363	AT1G06580	PENTATRICOPEPTIDE REPEAT 1 (PPR1)	Pentatricopeptide Repeat Protein. During pathogen infection its mRNA is cleaved by MIR400 which down regulates its expression. Mutants are more susceptible to infection ny bacteria.
364	AT1G06620		encodes a protein whose sequence is similar to a 2-oxoglutarate-dependent dioxygenase The mRNA is cell-to-cell mobile.
365	AT1G06640		encodes a protein whose sequence is similar to a 2-oxoglutarate-dependent dioxygenase The mRNA is cell-to-cell mobile.
366	AT1G06650		encodes a protein whose sequence is similar to 2-oxoglutarate-dependent dioxygenase The mRNA is cell-to-cell mobile.
367	AT1G06680	PHOTOSYSTEM II SUBUNIT P-1 (PSBP-1)	Encodes a 23 kD extrinsic protein that is part of photosystem II and participates in the regulation of oxygen evolution. Phosphorylation of this protein is dependent on calcium. In plsp1-1 mutant plastids, the nonmature form of the protein localizes in the stroma. The mRNA is cell-to-cell mobile.
368	AT1G06690		NAD(P)-linked oxidoreductase superfamily protein
369	AT1G06710	MITOCHONDRIAL STABILITY FACTOR 1 (MTSF1)	Pentatricopeptide repeat protein that stabilizes nad4 mRNA in mitochondria.
370	AT1G06720		P-loop containing nucleoside triphosphate hydrolases superfamily protein
371	AT1G06730		pfkB-like carbohydrate kinase family protein
372	AT1G06750		P-loop containing nucleoside triphosphate hydrolases superfamily protein
373	AT1G06780	GALACTURONOSYLTRANSFERASE 6 (GAUT6)	Encodes a protein with putative galacturonosyltransferase activity. Required for synthesis of native homogalacturonan in growing pollen tubes; critical role in pollen tube growh and male fertility.
374	AT1G06800	PHOSPHOLIPASE A I GAMMA 1 (PLA-I{gamma}1)	Encodes a lipase that hydrolyzes phosphatidylcholine, glycolipids as well as triacylglycerols.
375	AT1G06810		endonuclease/glycosyl hydrolase
376	AT1G06830	CEP DOWNSTREAM 1 (CEPD1)	Encodes a member of the CC-type glutaredoxin (ROXY) family that has been shown to interact with the transcription factor TGA2. CEPD1 is a non secreted polypeptide that is highly similar to CEPD2 which is another member of a novel family related to glutaredoxins. It is induced by nitrogen starvation. It acts downstream of the CEP1 peptide in systemic N-demand signalling .The RNA is expressed in th…
377	AT1G06840	HDS-ASSOCIATED RLK1 (HAK1)	Homomultimers interact with cytoplasmic signaling molecule PBL27, resulting in herbivory resistance, in an ethylene-dependent manner.
378	AT1G06850	BASIC LEUCINE-ZIPPER 52 (bZIP52)	bZIP protein involved in heat stress response. Under heat stress localization moves exclusively to nucleus.
379	AT1G06870	PLASTIDIC TYPE I SIGNAL PEPTIDASE 2A (PLSP2A)	Peptidase S24/S26A/S26B/S26C family protein
380	AT1G06890	UDP-XYLOSE TRANSPORTER3 (UXT3)	UXT3 is a member of the NST-KT subfamily of nucleotide/sugar transporters. It is localized to the golgi and functions as a UDP-Xyl transporter.
381	AT1G06900		Insulinase (Peptidase family M16) family protein
382	AT1G06970	CATION/HYDROGEN EXCHANGER 14 (CHX14)	member of Putative Na+/H+ antiporter family
383	AT1G06980		PADRE protein
384	AT1G06990		GDSL-motif esterase/acyltransferase/lipase. Enzyme group with broad substrate specificity that may catalyze acyltransfer or hydrolase reactions with lipid and non-lipid substrates.
385	AT1G07000	EXOCYST SUBUNIT EXO70 FAMILY PROTEIN B2 (EXO70B2)	A member of EXO70 gene family, putative exocyst subunits, conserved in land plants. Arabidopsis thaliana contains 23 putative EXO70 genes, which can be classified into eight clusters on the phylogenetic tree.
386	AT1G07010	SHEWENELLA-LIKE PROTEIN PHOSPHATASE 1 (SLP1)	Calcineurin-like metallo-phosphoesterase superfamily protein
387	AT1G07025		Mitochondrial substrate carrier family protein
388	AT1G07040		plant/protein
389	AT1G07050	FITNESS (FITNESS)	FITNESS encodes a protein with a single CCT domain and belongs to the CCT motif family genes (CMF). FITNESS acts upstream JUB1 thereby controlling H2O2 levels. FITNESS has a role in cellular redox homeostasis controlling H2O2 levels, due to changes in enzymes, metabolites and transcripts related to ROS detoxification.
390	AT1G07060	DSB FORMATION (DFO)	hypothetical protein
391	AT1G07080		Thioredoxin superfamily protein
392	AT1G07090	LIGHT SENSITIVE HYPOCOTYLS 6 (LSH6)	LIGHT-DEPENDENT SHORT HYPOCOTYLS-like protein (DUF640)
393	AT1G07120	IPGA1-LIKE1 (IPGAL1)	CHUP1-like protein
394	AT1G07130	(STN1)	Encodes a protein with similarity to yeast STN1, an OB fold protein involved in protecting yeast telomeres. In Arabidopsis, loss of STN1 function mutations exhibit gross morphological abnormalities and defects in telomere architecture and maintenance. STN1 likely plays a role in telomere end capping.
395	AT1G07135		glycine-rich protein
396	AT1G07140	(SIRANBP)	Encodes a putative Ran-binding protein (siRanBP).
397	AT1G07150	MITOGEN-ACTIVATED PROTEIN KINASE KINASE KINASE 13 (MAPKKK13)	Member of MEKK subfamily. Involved in wound induced signaling where it interacts with At5g40440, and activates At1g59580.
398	AT1G07160		Protein phosphatase 2C family protein
399	AT1G07180	ALTERNATIVE NAD(P)H DEHYDROGENASE 1 (NDA1)	Internal NAD(P)H dehydrogenase in mitochondria. The predicted protein sequence has high homology with other designated NAD(P)H DHs from microorganisms; the capacity for matrix NAD(P)H oxidation via the rotenone-insensitive pathway is significantly reduced in the Atndi1 mutant plant line; the in vitro translation product of AtNDI1 is imported into isolated mitochondria and located on the inside of…
400	AT1G07190		Lon protease
401	AT1G07210		Ribosomal protein S18
402	AT1G07220		O-glucosyltransferase rumi-like protein (DUF821)
403	AT1G07240	UDP-GLUCOSYL TRANSFERASE 71C5 (UGT71C5)	Encodes a UDP-glucosyltransferase that plays a role in abscisic acid (ABA) glucosylation from ABA to ABA-glucose ester and regulates ABA homeostasis, thereby influencing the ABA signal network.
404	AT1G07250	UDP-GLUCOSYL TRANSFERASE 71C4 (UGT71C4)	UDP-glucosyl transferase 71C4
405	AT1G07260	UDP-GLUCOSYL TRANSFERASE 71C3 (UGT71C3)	Encodes a uridine diphosphate-glycosyltransferase that acts on methyl salicylate (MeSA) to form MeSA glucosides in vitro and in vivo and facilitates negative regulation of the SAR response by modulating homeostasis of MeSA and SA.
406	AT1G07280		Tetratricopeptide repeat (TPR)-like superfamily protein
407	AT1G07290	GOLGI NUCLEOTIDE SUGAR TRANSPORTER 2 (GONST2)	Encodes a GDP-mannose transporter.
408	AT1G07300		josephin protein-like protein
409	AT1G07320	RIBOSOMAL PROTEIN L4 (RPL4)	encodes a plastid ribosomal protein L4
410	AT1G07330		dentin sialophosphoprotein
411	AT1G07340	SUGAR TRANSPORTER 2 (STP2)	sugar transporter 2
412	AT1G07360	MOS4-ASSOCIATED COMPLEX SUBUNIT 5A (MAC5A)	Encodes MAC5A, a component of the MOS4-associated complex (MAC) that contributes to snc1- mediated autoimmunity. MAC is a highly conserved nuclear protein complex associated with the spliceosome. Homologues include AT1G07360 (MAC5A), AT2G29580 (MAC5B) and AT5G07060 (MAC5C).
413	AT1G07380	NEUTRAL CERAMIDASE 1 (ATNCER1)	Encodes a neutral ceramidase that is involved in sphingolipid homeostasis and responses to oxidative stress.
414	AT1G07390	RECEPTOR LIKE PROTEIN 1 (RLP1)	receptor like protein 1
415	AT1G07430	HIGHLY ABA-INDUCED PP2C GENE 2 (HAI2)	Encodes a member of the group A protein phosphatase 2C (PP2C) family that is responsible for negatively regulating seed dormancy.
416	AT1G07440		NAD(P)-binding Rossmann-fold superfamily protein
417	AT1G07450		NAD(P)-binding Rossmann-fold superfamily protein
418	AT1G07460		Concanavalin A-like lectin family protein
419	AT1G07490	ROTUNDIFOLIA LIKE 3 (RTFL3)	ROTUNDIFOLIA like 3
420	AT1G07500	SIAMESE-RELATED 5 (SMR5)	SMR5 is a member of the SIAMESE-RELATED Cyclin-Dependent Kinase Inhibitor family. It is induced by ROS/oxidative stress.
421	AT1G07520		GRAS family transcription factor
422	AT1G07540	TRF-LIKE 2 (TRFL2)	Arabidopsis thaliana telomere-binding protein, putative (At1g07540)
423	AT1G07550		Leucine-rich repeat protein kinase family protein
424	AT1G07560		Leucine-rich repeat protein kinase family protein
425	AT1G07570	(APK1A)	Protein kinase capable of phosphorylating tyrosine, serine, and threonine residues
426	AT1G07590		Tetratricopeptide repeat (TPR)-like superfamily protein
427	AT1G07600	METALLOTHIONEIN 1A (MT1A)	metallothionein, binds to and detoxifies excess copper and other metals, limiting oxidative damage.
428	AT1G07610	METALLOTHIONEIN 1C (MT1C)	one of the five metallothioneins (MTs) genes identified in Arabidopsis. MTs are cysteine-rich proteins required for heavy metal tolerance. The mRNA is cell-to-cell mobile.
429	AT1G07620	(ATOBGM)	GTP-binding protein Obg/CgtA
430	AT1G07630	POL-LIKE 5 (PLL5)	Encodes a protein phosphatase 2C like gene, similar to POL. Involved in leaf development. Knockout mutants have abnormally shaped leaves.
431	AT1G07640	(OBP2)	A member of the DOF transcription factors. Prominently expressed in the phloem of leaves and other organs. Expression is induced by wounding, MeJA and insect feeding. Upregulates glucosinolate biosynthesis. PEAR protein involved in the formation of a short-range concentration gradient that peaks at protophloem sieve elements, and activates gene expression that promotes radial growth. Locally prom…
432	AT1G07680		transmembrane protein
433	AT1G07690		transmembrane protein
434	AT1G07700		Thioredoxin superfamily protein
435	AT1G07720	3-KETOACYL-COA SYNTHASE 3 (KCS3)	Encodes KCS3, a member of the 3-ketoacyl-CoA synthase family involved in the biosynthesis of VLCFA (very long chain fatty acids).
436	AT1G07730		Disease resistance-responsive (dirigent-like protein) family protein
437	AT1G07740		Tetratricopeptide repeat (TPR)-like superfamily protein
438	AT1G07745	HOMOLOG OF RAD51 D (RAD51D)	Is a suppressor of SNI1. Encodes a member of the RecA/RAD51 family of DNA recombination and repair proteins. Both RAD51 and SNI1 have a dual role in pathogen-related gene transcription and somatic homologous recombination.
439	AT1G07750		RmlC-like cupins superfamily protein
440	AT1G07795		forkhead box protein G1
441	AT1G07830		ribosomal protein L29 family protein
442	AT1G07840		Sas10/Utp3/C1D family
443	AT1G07850		transferring glycosyl group transferase (DUF604)
444	AT1G07860		Serine/Threonine-kinase RLCKVII protein
445	AT1G07870		Protein kinase superfamily protein
446	AT1G07880	(ATMPK13)	member of MAP Kinase
447	AT1G07890	ASCORBATE PEROXIDASE 1 (APX1)	Encodes a cytosolic ascorbate peroxidase APX1. Ascorbate peroxidases are enzymes that scavenge hydrogen peroxide in plant cells. Eight types of APX have been described for Arabidopsis: three cytosolic (APX1, APX2, APX6), two chloroplastic types (stromal sAPX, thylakoid tAPX), and three microsomal (APX3, APX4, APX5) isoforms. At least part of the induction of heat shock proteins during light stres…
448	AT1G07910	RNALIGASE (RNL)	Encodes a tRNA ligase that resembles the yeast Trl1 RNA ligase in structure and function but very different in sequence. Like Trl1, AtRNL consists of two domains, an N-terminal ligase component and a C-terminal 5'-kinase/2',3'-cyclic phosphodiesterase (CPD) component that can function in tRNA splicing in vivo when expressed as separate polypeptides. Requires a 2'-PO4 end for tRNA splicing in vivo.
449	AT1G07990		SIT4 phosphatase-associated family protein
450	AT1G08000	GATA TRANSCRIPTION FACTOR 10 (GATA10)	Encodes a member of the GATA factor family of zinc finger transcription factors.
451	AT1G08020
452	AT1G08030	TYROSYLPROTEIN SULFOTRANSFERASE (TPST)	Encodes a tyrosylprotein sulfotransferase (TPST). This protein is a 500-aa type I transmembrane protein that shows no sequence similarity to animal TPSTs. Activity confirmed by protein expression in yeast. TPST is expressed throughout the plant body, and the highest levels of expression are in the root apical meristem. TPST acts in the auxin pathway to maintain postembryonic root stem cell niche …
453	AT1G08050		Zinc finger (C3HC4-type RING finger) family protein
454	AT1G08065	ALPHA CARBONIC ANHYDRASE 5 (ACA5)	Mediates stimulation of ATP synthesis by bicarbonate in isolated thylakoids.
455	AT1G08080	ALPHA CARBONIC ANHYDRASE 7 (ACA7)	alpha carbonic anhydrase 7
456	AT1G08090	NITRATE TRANSPORTER 2:1 (NRT2:1)	High-affinity nitrate transporter. Up-regulated by nitrate. Functions as a repressor of lateral root initiation independently of nitrate uptake.
457	AT1G08100	NITRATE TRANSPORTER 2.2 (NRT2.2)	Encodes a high-affinity nitrate transporter.
458	AT1G08150	(ATCHX5)	member of Putative Na+/H+ antiporter family
459	AT1G08170	(HTB8)	Histone superfamily protein
460	AT1G08180	SIAMESE-RELATED 2 (SMR2)	cyclin-dependent kinase inhibitor
461	AT1G08210		Eukaryotic aspartyl protease family protein
462	AT1G08220		ATPase complex subunit
463	AT1G08230		Codes for a H+-driven, high affinity gamma-aminobutyric acid (GABA) transporter. Localized at the plasma membrane. In planta, AtGAT1 expression was highest in flowers and under conditions of elevated GABA concentrations such as wounding or senescence.
464	AT1G08250	AROGENATE DEHYDRATASE 6 (ADT6)	Encodes a plastid-localized arogenate dehydratase involved in phenylalanine biosynthesis. Although this enzyme has sequence similarity to prephenate dehydratases, it is 98 times more active with arogenate than prephenate in enzymatic assays.
465	AT1G08260	TILTED 1 (TIL1)	Similar to POL2A, DNA polymerase epsilon catalytic subunit. Essential for Arabidopsis growth. Null homozygotes are embryo lethal, partial loss of function alleles show embryo patterning defects such as root pole displacement. Delayed progression through cell cycle results in embryos with smaller numbers of larger cells.
466	AT1G08280	GLYCOSYLTRANSFERASE 29A (GALT29A)	Encodes a glycosyltransferase (GT) GALT29A, which belongs to the Carbohydrate Active Enzyme family GT29. GALT29A co-expresses with other arabinogalactan GTs, GALT31A and GLCAT14A. The recombinant GALT29A expressed in Nicotiana benthamiana demonstrated a galactosyltransferase activity, transferring galactose from UDP-galactose to a mixture of various oligosaccharides derived from arabinogalactan p…
467	AT1G08310		alpha/beta-Hydrolases superfamily protein
468	AT1G08320	TGACG (TGA) MOTIF-BINDING PROTEIN 9 (TGA9)	bZIP transcription factor family protein
469	AT1G08325
470	AT1G08340		Rho GTPase activating protein with PAK-box/P21-Rho-binding domain-containing protein
471	AT1G08380	PHOTOSYSTEM I SUBUNIT O (PSAO)	Encodes subunit O of photosystem I.
472	AT1G08420	BRI1 SUPPRESSOR 1 (BSU1)-LIKE 2 (BSL2)	Protein phosphatase which promotes stomatal ACD by establishing kinase-based signalling asymmetry in the two daughter cells.
473	AT1G08430	ALUMINUM-ACTIVATED MALATE TRANSPORTER 1 (ALMT1)	Encodes a Al-activated malate efflux transporter. It is essential for aluminum tolerance but does not represent the major Al tolerance QTL. Staurosporine and calyculin A both block all changes in AtALMT1 gene expression (as a result malate release is totally inhibited). AtALMT1 transcription was clearly induced by indole-3-acetic acid, abscisic acid, low pH, hydrogen peroxide and flg22. STOP1 and…
474	AT1G08500	EARLY NODULIN-LIKE PROTEIN 18 (ENODL18)	early nodulin-like protein 18
475	AT1G08520	ALBINA 1 (ALB1)	Encodes the CHLD subunit of the Mg-chelatase enzyme involved in chlorophyll biosynthesis. Lines carrying recessive mutations of this locus are white and seedling lethal.
476	AT1G08540	RNAPOLYMERASE SIGMA SUBUNIT 2 (SIG2)	Enodes a subunit of chloroplast RNA polymerase, confers the ability to recognize promoter sequences on the core enzyme. SIG1 is induced by red and blue light.
477	AT1G08550	NON-PHOTOCHEMICAL QUENCHING 1 (NPQ1)	Violaxanthin deepoxidase involved in xanthophyll cycle.Two major consequences of the npq1 mutation are the absence of zeaxanthin formation in strong light and the partial inhibition of the quenching of singlet excited chlorophylls in the photosystem II light-harvesting complex
478	AT1G08560	SYNTAXIN OF PLANTS 111 (SYP111)	member of SYP11 syntaxin Gene Family
479	AT1G08580		hypothetical protein
480	AT1G08590	PXY-LIKE1 (PXL1)	Encodes one of the two putative eLRR kinase closely related to PXY (At1g08590/PXL1 and At4g28650/PXL2). Insertion mutants in either pxl1 or pxl2 do not exhibit an obvious phenotype in the stem; double-mutant combinations of a Col allele, of pxy (pxy-3) with pxl1 and pxl2, generate a more severe vascular phenotype than pxy-3 alone, suggesting that these genes act synergistically with PXY in regula…
481	AT1G08600	(ATRX)	The Arabidopsis ATRX harbours a N-terminal ADD domain and a C-terminal helicase domain and is devoid of the large central region involved in DAXX interaction in mammals. Arabidopsis ATRX mutant alleles are viable, but with reduced fertility. Their combination with mutants for the H3.3 chaperone HIRA impairs plant survival. ATRX loss affects cellular histone H3.3 pools and modulates the H3.1/H3.3 …
482	AT1G08610		Pentatricopeptide repeat (PPR) superfamily protein
483	AT1G08630	THREONINE ALDOLASE 1 (THA1)	Encodes a threonine aldolase, involved in threonine degradation to glycine. Primarily expressed in seeds and seedlings.
484	AT1G08650	PHOSPHOENOLPYRUVATE CARBOXYLASE KINASE 1 (PPCK1)	Encodes a phosphoenolpyruvate carboxylase kinase that is expressed at highest levels in leaves. Expression is induced by light. The mRNA is cell-to-cell mobile.
485	AT1G08660	MALE GAMETOPHYTE DEFECTIVE 2 (MGP2)	Encodes a sialyltransferase-like protein that is localized to the Golgi apparatus and is involved in pollen tube growth and pollen germination.
486	AT1G08670		ENTH/VHS family protein
487	AT1G08680	ARF GAP-LIKE ZINC FINGER-CONTAINING PROTEIN ZIGA4 (ZIGA4)	A member of ARF GAP domain (AGD), A thaliana has 15 members, grouped into four classes. AGD14 belongs to the class 4, together with AGD15.
488	AT1G08700	PRESENILIN-1 (PS1)	Encodes a protein similar to animal presenilin whose expression is increased in response to potassium (K+) deprivation. Located in intracellular membrane compartments.
489	AT1G08710		F-box protein that is induced in roots by drought stress.
490	AT1G08720	ENHANCED DISEASE RESISTANCE 1 (EDR1)	enhanced disease resistance 1 (EDR1) confers resistance to powdery mildew disease caused by the fungus Erysiphe cichoracearum The mRNA is cell-to-cell mobile.
491	AT1G08800	MYOSIN BINDING PROTEIN 1 (MYOB1)	myosin-binding protein (Protein of unknown function, DUF593)
492	AT1G08810	MYB DOMAIN PROTEIN 60 (MYB60)	putative transcription factor of the R2R3-MYB gene family. Transcript increases under conditions that promote stomatal opening (white and blue light, abi1-1 mutation) and decreases under conditions that trigger stomatal closure (ABA, desiccation, darkness), with the exception of elevated CO2. Expressed exclusively in guard cells of all tissues. It is required for light-induced opening of stomata.…
493	AT1G08830	COPPER/ZINC SUPEROXIDE DISMUTASE 1 (CSD1)	Encodes a cytosolic copper/zinc superoxide dismutase CSD1 that can detoxify superoxide radicals. Its expression is affected by miR398-directed mRNA cleavage. Regulated by biotic and abiotic stress. Activation of CSD1 in the cytoplasm involves both a CCS-dependent and -independent pathway.
494	AT1G08860	BONZAI 3 (BON3)	Encodes a copine-like protein, which is a member of a newly identified class of calcium-dependent, phospholipid binding proteins that are present in a wide range of organisms. Overexpression of this gene suppresses bon1-1 phenotypes. Double mutant analyses with bon1-1 suggest that BON1 and BON3 have overlapping functions in maintaining cellular homeostasis and inhibiting cell death.
495	AT1G08900		Major facilitator superfamily protein
496	AT1G08920	ERD (EARLY RESPONSE TO DEHYDRATION) SIX-LIKE 1 (ESL1)	Encodes ESL1, a transporter for monosaccharides.
497	AT1G08930	EARLY RESPONSE TO DEHYDRATION 6 (ERD6)	encodes a putative sucrose transporter whose gene expression is induced by dehydration and cold. The mRNA is cell-to-cell mobile.
498	AT1G08940		Phosphoglycerate mutase family protein
499	AT1G08970	NUCLEAR FACTOR Y, SUBUNIT C9 (NF-YC9)	Encodes a NUCLEAR FACTOR-Y C (NF-YC) homologue NF-YC9. NF-YC3., NF-YC4 and NF-YC9 redundantly modulate GA- and ABA-mediated seed germination.
500	AT1G08980	AMIDASE 1 (AMI1)	Encodes an enzyme with similarity to bacterial acylamidohydrolases and exhibits indole-3-acetamide amidohydrolase activity in vitro. This enzyme may be involved in the in vivo biosynthesis of indole-acetic acid from indole-3-acetamide, a native metabolite of A. thaliana. It appears to exist as a monomer.
501	AT1G08990	PLANT GLYCOGENIN-LIKE STARCH INITIATION PROTEIN 5 (PGSIP5)	plant glycogenin-like starch initiation protein 5
502	AT1G09000	NPK1-RELATED PROTEIN KINASE 1 (NP1)	NPK1-related protein kinase 1S
503	AT1G09020	HOMOLOG OF YEAST SUCROSE NONFERMENTING 4 (SNF4)	Component of the regulatory subunit of SNF1-related protein kinase. As part of the regulatory complex it binds maltose which promotes kinase activity.
504	AT1G09030	NUCLEAR FACTOR Y, SUBUNIT B4 (NF-YB4)	nuclear factor Y, subunit B4
505	AT1G09080	BINDING PROTEIN 3 (BIP3)	Heat shock protein 70 (Hsp 70) family protein
506	AT1G09090	RESPIRATORY BURST OXIDASE HOMOLOG B (RBOHB)	NADPH-oxidase AtrbohB plays a role in seed after-ripening. Major producer of superoxide in germinating seeds. AtrbohB pre-mRNA is alternatively spliced in seeds in a hormonally and developmentally regulated manner. ABA caused accumulation of AtrbohB-? mRNA and prevented prevented AtrbohB-a mRNA expression in fresh seeds.
507	AT1G09100	26S PROTEASOME AAA-ATPASE SUBUNIT RPT5B (RPT5B)	Encodes RPT5b (Regulatory Particle 5b), one of the six AAA-ATPases of the proteasome regulatory particle. Essential for gametophyte development. In Arabidopsis, the RPT5 subunit is encoded by two highly homologous genes, RPT5a and RPT5b. RPT5a and RPT5b show accession-dependent functional redundancy. In Wassilewskija (Ws) accession: mutant alleles of RPT5a displayed 50% pollen lethality, indicati…
508	AT1G09130		ATP-dependent caseinolytic (Clp) protease/crotonase family protein
509	AT1G09155	PHLOEM PROTEIN 2-B15 (PP2-B15)	phloem protein 2-B15
510	AT1G09160		Protein phosphatase 2C family protein
511	AT1G09170		P-loop nucleoside triphosphate hydrolases superfamily protein with CH (Calponin Homology) domain-containing protein
512	AT1G09180	SECRETION-ASSOCIATED RAS SUPER FAMILY 1 (SARA1A)	A member of ARF-like GTPase family. A thaliana has 21 members, in two subfamilies, ARF and ARF-like (ARL) GTPases.
513	AT1G09190		Tetratricopeptide repeat (TPR)-like superfamily protein
514	AT1G09200	HISTONE 3.1 (H3.1)	Histone superfamily protein
515	AT1G09220		Pentatricopeptide repeat (PPR) superfamily protein
516	AT1G09250	ATBS1 INTERACTING FACTOR 4 (AIF4)	basic helix-loop-helix (bHLH) DNA-binding superfamily protein
517	AT1G09280		rhodanese-like domain protein
518	AT1G09290		hypothetical protein
519	AT1G09300	(ATICP55)	Encodes a mitochondrial protease ICP55. Alters the stability of proteins by removal of a single amino acid from their sequence.
520	AT1G09310	(SVB2)	ABA responsive trichome formation regulator.
521	AT1G09320	AGENET DOMAIN (AGD)-CONTAINING P1 (AGDP1)	Heterochromatin-binding protein which can bind to three H3K9me2 tails. Preferentially binds to long TEs. Required for transcriptional silencing, non-CG DNA methylation, and H3K9 dimethylation at some loci.
522	AT1G09340	CHLOROPLAST RNA BINDING (CRB)	Encodes CHLOROPLAST RNA BINDING (CRB), a putative RNA-binding protein. CRB is important for the proper functioning of the chloroplast. Mutations in CRB also affects the circadian system, altering the expression of both oscillator and output genes. The mRNA is cell-to-cell mobile.
523	AT1G09350	GALACTINOL SYNTHASE 3 (GolS3)	Predicted to encode a galactinol synthase
524	AT1G09360		Plant invertase/pectin methylesterase inhibitor superfamily protein
525	AT1G09370		Plant invertase/pectin methylesterase inhibitor superfamily protein
526	AT1G09380	USUALLY MULTIPLE ACIDS MOVE IN AND OUT TRANSPORTERS 25 (UMAMIT25)	nodulin MtN21-like transporter family protein
527	AT1G09390		GDSL-motif esterase/acyltransferase/lipase. Enzyme group with broad substrate specificity that may catalyze acyltransfer or hydrolase reactions with lipid and non-lipid substrates.
528	AT1G09400		FMN-linked oxidoreductases superfamily protein
529	AT1G09410		pentatricopeptide (PPR) repeat-containing protein
530	AT1G09415	NIM1-INTERACTING 3 (NIMIN-3)	encodes a kinase that physically interacts with NPR1/NIM1
531	AT1G09420	GLUCOSE-6-PHOSPHATE DEHYDROGENASE 4 (G6PD4)	Encodes a protein similar to glucose-6-phosphate dehydrogenase but, based on amino acid differences in the active site and lack of activity, does not encode a functional G6PDH. The amino acid sequence for the consensus sequence of the G6PDH active site (DHYLGKE) differs in three places in this protein. gc exon splice site at 20574 is based on protein alignment, and is not confirmed experimentally.
532	AT1G09430	ATP-CITRATE LYASE A-3 (ACLA-3)	Encodes subunit A of the heteromeric enzyme ATP citrate lyase (ACL). In animals, ACL is encoded by a single gene; ACL in Arabidopsis is composed of two polypeptides, ACLA (encoded by 3 genes) and ACLB (encoded by 2 genes). The holoenzyme has an A(4)B(4)stoichiometry. Expression of both ACLA and ACLB but not of either of the subunits alone results in ACL activity.
533	AT1G09440		Protein kinase superfamily protein
534	AT1G09450	HASPIN-RELATED GENE (Haspin)	Encodes a protein kinase that phosphorylates histone H3 at Thr3 and Thr11 and plays a role in mitotic cell division.
535	AT1G09460		Carbohydrate-binding X8 domain superfamily protein
536	AT1G09470	(ATNEAP3)	NEAP3 is a member of a small family containing coiled-coil domains, a nuclear localization signal and a C-terminal predicted transmembrane domain. It localizes to the nuclear periphery. Mutants have altered nuclear morphology and chromatin structure.
537	AT1G09480		similar to Eucalyptus gunnii alcohol dehydrogenase of unknown physiological function (GI:1143445), Vigna unguiculata (gi:1854445), NOT a cinnamyl-alcohol dehydrogenase The mRNA is cell-to-cell mobile.
538	AT1G09500		similar to Eucalyptus gunnii alcohol dehydrogenase of unknown physiological function (GI:1143445), Vigna unguiculata (gi:1854445), NOT a cinnamyl-alcohol dehydrogenase
539	AT1G09510		similar to Eucalyptus gunnii alcohol dehydrogenase of unknown physiological function (GI:1143445), Vigna unguiculata (gi:1854445), NOT a cinnamyl-alcohol dehydrogenase
540	AT1G09530	PHYTOCHROME INTERACTING FACTOR 3 (PIF3)	Transcription factor interacting with photoreceptors phyA and phyB. Forms a ternary complex in vitro with G-box element of the promoters of LHY, CCA1. Acts as a negative regulator of phyB signalling. It degrades rapidly after irradiation of dark grown seedlings in a process controlled by phytochromes. Does not play a significant role in controlling light input and function of the circadian clockw…
541	AT1G09540	MYB DOMAIN PROTEIN 61 (MYB61)	Encodes putative transcription factor. Mutants lack of mucilage extrusion from the seeds during imbibition. Reduced quantities of mucilage are deposited during the development of the seed coat epidermis in myb61 mutants. Expressed in guard cells,loss of function mutations show an increase in stomatal pore opening suggesting a role in ABA independent regulation of stomatal pore size.
542	AT1G09550	PECTIN ACETYLESTERASE 1 (ATPAE1)	Pectinacetylesterase family protein
543	AT1G09560	GERMIN-LIKE PROTEIN 5 (GLP5)	Encodes a plasodesmata-located protein involved in regulating primary root growth by controlling phloem-mediated allocation of resources between the primary and lateral root meristems. The mRNA is cell-to-cell mobile.
544	AT1G09570	PHYTOCHROME A (PHYA)	Light-labile cytoplasmic red/far-red light photoreceptor involved in the regulation of photomorphogenesis. It exists in two inter-convertible forms: Pr and Pfr (active) and functions as a dimer.The N terminus carries a single tetrapyrrole chromophore, and the C terminus is involved in dimerization. It is the sole photoreceptor mediating the FR high irradiance response (HIR). Major regulator in re…
545	AT1G09600		Protein kinase superfamily protein
546	AT1G09610	GLUCURONOXYLAN METHYLTRANSFERASE1 (GXM1)	glucuronoxylan 4-O-methyltransferase-like protein (DUF579)
547	AT1G09630	RAB GTPASE 11C (RAB11c)	Encodes a putative GTP-binding protein. Associates with organelles on a pathway from the Golgi to the plasma membrane in interphase. In dividing cells acts at the cell plate.
548	AT1G09660		RNA-binding KH domain-containing protein
549	AT1G09670
550	AT1G09700	HYPONASTIC LEAVES 1 (HYL1)	Encodes a nuclear dsRNA binding protein. Involved in mRNA cleavage. The mutant is characterized by shorter stature, delayed flowering, leaf hyponasty, reduced fertility, decreased rate of root growth, and an altered root gravitropic response. It also exhibits less sensitivity to auxin and cytokinin.
551	AT1G09720	NETWORKED 2B (NET2B)	Member of NET domain family of actin binding proteins. Paralog of At3g22790 (NET2A).
552	AT1G09740		Adenine nucleotide alpha hydrolases-like superfamily protein
553	AT1G09750		Eukaryotic aspartyl protease family protein
554	AT1G09780	2,3-BIPHOSPHOGLYCERATE-INDEPENDENT PHOSPHOGLYCERATE MUTASE 1 (iPGAM1)	Encodes a 2,3-biphosphoglycerate-independent phosphoglycerate mutase that is involved in pollen development and stomatal movement.
555	AT1G09790	COBRA-LIKE PROTEIN 6 PRECURSOR (COBL6)	COBRA-like protein 6 precursor
556	AT1G09800		Pseudouridine synthase family protein
557	AT1G09810	EVOLUTIONARILY CONSERVED C-TERMINAL REGION 11 (ECT11)	evolutionarily conserved C-terminal region 11
558	AT1G09830	PURINE BIOSYNTHESIS 2 (PUR2)	glycinamide ribonucleotide synthetase (GAR synthetase) that catalyzes the conversion of phosphoribosyl amine to phosphoribosyl glycineamide
559	AT1G09840	SHAGGY-LIKE PROTEIN KINASE 41 (SK41)	GSK3-like kinase, sub-group IV.
560	AT1G09850	XYLEM BARK CYSTEINE PEPTIDASE 3 (XBCP3)	Arabidopsis thaliana papain-like cysteine peptidase
561	AT1G09890		Rhamnogalacturonate lyase family protein
562	AT1G09930	OLIGOPEPTIDE TRANSPORTER 2 (OPT2)	oligopeptide transporter
563	AT1G09940	(HEMA2)	Encodes glutamyl-tRNA reductase. Involved in heme biosynthesis in non-photosynthetic tissues and induced by oxidative stress in photosynthetic tissues to supply heme for defensive hemoproteins
564	AT1G09950	RESPONSE TO ABA AND SALT 1 (RAS1)	RESPONSE TO ABA AND SALT 1
565	AT1G09960	SUCROSE TRANSPORTER 4 (SUT4)	low affinity (10mM) sucrose transporter in sieve elements (phloem)
566	AT1G09970	(LRR XI-23)	RLK7 belongs to a leucine-rich repeat class of receptor-likekinase (LRR-RLKs). It is involved in the control of germination speed and the tolerance to oxidant stress. The mRNA is cell-to-cell mobile.
567	AT1G09990
568	AT1G10000		Ribonuclease H-like superfamily protein
569	AT1G10010	AMINO ACID PERMEASE 8 (AAP8)	Encodes a high affinity amino acid transporter that is probably responsible for import of organic nitrogen into developing seeds. One of eight gene family members that encode amino acid permeases. Most closely related to AAP1 (75%) identity.
570	AT1G10020		formin-like protein (DUF1005)
571	AT1G10050		Encodes a putative glycosyl hydrolase family 10 protein (xylanase).
572	AT1G10060	BRANCHED-CHAIN AMINO ACID TRANSAMINASE 1 (BCAT-1)	encodes a mitochondrial branched-chain amino acid aminotransferase. Complements the yeast leu/iso-leu/val auxotrophy mutant.
573	AT1G10070	BRANCHED-CHAIN AMINO ACID TRANSAMINASE 2 (BCAT-2)	Encodes a chloroplast branched-chain amino acid aminotransferase. Complements the yeast leu/iso-leu/val auxotrophy mutant. Involved in cell wall development.
574	AT1G10090		Early-responsive to dehydration stress protein (ERD4)
575	AT1G10110	F-BOX/DUF295 BRASSICEAE-SPECIFIC 1 (ATFDB1)	F-box family protein
576	AT1G10120	CRY2-INTERACTING BHLH 4 (CIB4)	basic helix-loop-helix (bHLH) DNA-binding superfamily protein
577	AT1G10140		Uncharacterized conserved protein UCP031279
578	AT1G10150		Carbohydrate-binding protein
579	AT1G10170	NF-X-LIKE 1 (NFXL1)	Encodes AtNFXL1, a homologue of the putative human transcription repressor NF-X1. Functions as a negative regulator of the trichothecene phytotoxin-induced defense response.
580	AT1G10200	WLIM1 (WLIM1)	Encodes a member of the Arabidopsis LIM proteins: a family of actin bundlers with distinct expression patterns. WLIM1, WLIM2a, and WLIM2b are widely expressed, whereas PLIM2a, PLIM2b, and PLIM2c are predominantly expressed in pollen. Regulates actin cytoskeleton organization.
581	AT1G10210	MITOGEN-ACTIVATED PROTEIN KINASE 1 (MPK1)	Encodes ATMPK1. Kinase is activated by wounding.
582	AT1G10230	SKP1-LIKE 18 (SK18)	Involved in protein degradation. One target is PHR1.
583	AT1G10250		paired amphipathic helix Sin3-like protein
584	AT1G10260		transposable_element_gene;copia-like retrotransposon family, has a 3.6e-19 P-value blast match to gb|AAG52949.1| gag/pol polyprotein (Endovir1-1) (Arabidopsis thaliana) (Ty1_Copia-family);(source:TAIR10)
585	AT1G10270	GLUTAMINE-RICH PROTEIN 23 (GRP23)	glutamine-rich protein 23
586	AT1G10300	(NOG1-2)	GTPase involved in HA - and ABA-mediated signaling pathways, particularly during defense respnses to pathogens. A truncated version of NOG1-2 has been detected in Col-0, Ler-0, Rsch-4 ecotypes. Functions similarly to the paralogous gene NOG1-1.
587	AT1G10320		Zinc finger C-x8-C-x5-C-x3-H type family protein
588	AT1G10330		Tetratricopeptide repeat (TPR)-like superfamily protein
589	AT1G10340		Ankyrin repeat family protein
590	AT1G10360	GLUTATHIONE S-TRANSFERASE TAU 18 (GSTU18)	Encodes glutathione transferase belonging to the tau class of GSTs. Naming convention according to Wagner et al. (2002).
591	AT1G10370	EARLY-RESPONSIVE TO DEHYDRATION 9 (ERD9)	Encodes GSTU17 (Glutathione S-Transferase U17). Functions as a negative component of stress-mediated signal transduction pathways in drought and salt stress responses.
592	AT1G10380		Putative membrane lipoprotein
593	AT1G10390	DRACULA2 (DRA2)	DRA2 is a homolog of mammalian nucleoporin 98 and a likely component of the nuclear pore complex in Arabidopsis. It positively participates in the control of the hypocotyl elongation response to plant proximity and control of shade induced gene expression. Nucleoportin which redundantly inhibits flowering together with Nup98b through multiple pathways including clock, photoperiod, and age pathway…
594	AT1G10400		UDP-Glycosyltransferase superfamily protein
595	AT1G10420
596	AT1G10460	GERMIN-LIKE PROTEIN 7 (GLP7)	germin-like protein (GLP7)
597	AT1G10470	RESPONSE REGULATOR 4 (ARR4)	Encodes a two-component response regulator. Acts redundantly with ARR3 in the control of circadian period in a cytokinin-independent manner.
598	AT1G10480	ZINC FINGER PROTEIN 5 (ZFP5)	Encodes a zinc finger protein containing only a single zinc finger that acts downstream of ZFP6 in regulating trichome development by integrating GA and cytokinin signaling.
599	AT1G10490		GNAT acetyltransferase (DUF699)
600	AT1G10522	PLASTID REDOX INSENSITIVE 2 (PRIN2)	Encodes PRIN2 (plastid redox insensitive 2). PRIN2 mutants are impaired in PEP (plastid-encoded RNA polymerase) activity and high light-dependent plastid redox signalling to the nucleus.
601	AT1G10530		PADRE protein
602	AT1G10540	NUCLEOBASE-ASCORBATE TRANSPORTER 8 (NAT8)	nucleobase-ascorbate transporter 8
603	AT1G10550	XYLOGLUCAN:XYLOGLUCOSYL TRANSFERASE 33 (XTH33)	Encodes a membrane-localized protein that is predicted to function during cell wall modification.Overexpression of XTH33 results in abnormal cell morphology. It's expression is under epigenetic control by ATX1.
604	AT1G10560	PLANT U-BOX 18 (PUB18)	Encodes a protein containing a UND, a U-box, and an ARM domain. This protein has E3 ubiquitin ligase activity based on in vitro assays.
605	AT1G10585		basic helix-loop-helix (bHLH) DNA-binding superfamily protein
606	AT1G10610		basic helix-loop-helix (bHLH) DNA-binding superfamily protein
607	AT1G10640		Pectin lyase-like superfamily protein
608	AT1G10650		SBP (S-ribonuclease binding protein) family protein
609	AT1G10660		transmembrane protein
610	AT1G10670	ATP-CITRATE LYASE A-1 (ACLA-1)	One of the three genes encoding subunit A of the trimeric protein ATP Citrate Lyase. Antisense ACLA-1 plants cause a reduction in cytosolic acetyl-CoA metabolism and have upregulation of stress-related genes and down-regulation of primary metabolism and growth genes, suggesting the mutation restricts normal growth and developmental processes and puts the plant into a state of stress.
611	AT1G10690	(SMR8)	cyclin-dependent kinase inhibitor
612	AT1G10710	POOR HOMOLOGOUS SYNAPSIS 1 (PHS1)	Computational predictions suggested the presence of a small cysteine-rich protein beginning in intron 9 (Silverstein 2007), but subsequent analysis revealed that this region contains a tenth exon for the At1g10710 gene. PHS1 regulates recombination and pairing of homologous chromosomes during meiotic prophase by controlling transport of RAD50 from cytoplasm to the nucleus.
613	AT1G10720		BSD domain-containing protein
614	AT1G10750		carboxyl-terminal peptidase, putative (DUF239)
615	AT1G10760	STARCH EXCESS 1 (SEX1)	Encodes an &#945;-glucan, water dikinase required for starch degradation. Involved in cold-induced freezing tolerance. Mutations that eliminate the GWD protein or affect the dikinase domain of the enzyme dramatically reduce both the amount of phosphate in the amylopectin and the rate of starch degradation. Mature leaves of these mutants accumulate amounts of starch up to seven times greater than …
616	AT1G10770		Encodes a putative pectin methylesterase/invertase inhibitor. Anti-sense reduction of this gene's transcript results in pollen tube growth retardation and then partial male sterility and reduced seed set.
617	AT1G10780		F-box/RNI-like superfamily protein
618	AT1G10800		voltage-gated hydrogen channel-like protein
619	AT1G10810		NAD(P)-linked oxidoreductase superfamily protein
620	AT1G10830	15-CIS-ZETA-CAROTENE ISOMERASE (Z-ISO)	Encodes a functional 15-cis-zeta-carotene isomerase (Z-ISO).
621	AT1G10850		Leucine-rich repeat protein kinase family protein
622	AT1G10880		Putative role in response to salt stress. Mutants grow larger than the wild type under salt stress condition (Ann Stapleton and Ashley Green, 2009, personal communication).
623	AT1G10890		arginine/glutamate-rich 1 protein
624	AT1G10900	(PIP5K7)	Phosphatidylinositol-4-phosphate 5-kinase family protein
625	AT1G10920	LOCUS ORCHESTRATING VICTORIN EFFECTS1 (LOV1)	Encodes LOV1, a disease susceptibility gene that, paradoxically, is a member of the NBS-LRR resistance gene family. Conditions susceptibility to the fungus Cochliobolus victoriae and victorin-dependent induction of defense-associated proteins. Saturation mutagenesis identified 59 lov mutations that all display reduced susceptibility to vitorin. Mutations in known defense response pathways do not …
626	AT1G10940	SNF1-RELATED PROTEIN KINASE 2.4 (SNRK2.4)	Encodes a plant protein kinase similar to the calcium/calmodulin-dependent protein kinase subfamily and the SNF1 kinase subfamily (SnRK2) whose activity is activated by ionic (salt) and non-ionic (mannitol) osmotic stress. Kinase activity of its homolog in tobacco is induced by hyperosmotic condition within 1 minute. Phosphatidylinositol 4-phosphate 5-kinase (PIP5K) enzyme family member.
627	AT1G10960	FERREDOXIN 1 (FD1)	Phosphatidylinositol 4-phosphate 5-kinase (PIP5K) enzyme family member.
628	AT1G10970	ZINC TRANSPORTER 4 PRECURSOR (ZIP4)	A member of Zrt- and Irt-related protein (ZIP) family. transcript is induced in response to zinc deficiency in the root and shoot. Expression is regulated by copper, but response to copper deficiency is detected only after three weeks of deficiency. Phosphatidylinositol 4-phosphate 5-kinase (PIP5K) enzyme family member.
629	AT1G10980		Lung seven transmembrane receptor family protein
630	AT1G10990		transmembrane protein
631	AT1G11000	MILDEW RESISTANCE LOCUS O 4 (MLO4)	A member of a large family of seven-transmembrane domain proteins specific to plants, homologs of the barley mildew resistance locus o (MLO) protein. The Arabidopsis genome contains 15 genes encoding MLO proteins, with localization in plasma membrane. Phylogenetic analysis revealed four clades of closely-related AtMLO genes. ATMLO4 belongs to the clade I, with AtMLO11 and AtMLO14. The gene is exp…
632	AT1G11040		HSP40/DnaJ peptide-binding protein
633	AT1G11070		hydroxyproline-rich glycoprotein family protein
634	AT1G11080	SERINE CARBOXYPEPTIDASE-LIKE 31 (scpl31)	serine carboxypeptidase-like 31
635	AT1G11120	(DEG23)	CTTNBP 2 amino-terminal-like protein
636	AT1G11130	STRUBBELIG (SUB)	Encodes an atypical receptor-like kinase protein with a predicted extracellular domain of six leucine-rich repeats and an intracellular serine-threonine kinase domain expressed throughout the developing root but whose kinase activity is not essential for its function in vivo. Regulates expression of GLABRA2, CAPRICE, WEREWOLF, and ENHANCER OF GLABRA3. Required for floral organ shape, the developm…
637	AT1G11140
638	AT1G11170		lysine ketoglutarate reductase trans-splicing-like protein (DUF707)
639	AT1G11190	BIFUNCTIONAL NUCLEASE I (BFN1)	Encodes a bifunctional nuclease that acts on both RNA and DNA involved in nucleic acid degradation to facilitate nucleotide and phosphate recovery during senescence. It has mismatch-specific endonuclease activity with wide recognition of single base mismatches as well as the ability to cleave indel types of mismatches (heteroduplexes with loops).
640	AT1G11210		cotton fiber protein, putative (DUF761)
641	AT1G11220		cotton fiber, putative (DUF761)
642	AT1G11250	SYNTAXIN OF PLANTS 125 (SYP125)	member of SYP12 Gene Family
643	AT1G11260	SUGAR TRANSPORTER 1 (STP1)	Encodes a H+/hexose cotransporter. The mRNA is cell-to-cell mobile.
644	AT1G11280		S-locus lectin protein kinase family protein
645	AT1G11290	CHLORORESPIRATORY REDUCTION22 (CRR22)	Pentatricopeptide Repeat Protein containing the DYW motif. Required for editing of multiple plastid transcripts. Endonuclease activity.
646	AT1G11300	ENHANCED SHOOT GROWTH UNDER MANNITOL STRESS 1 (EGM1)	The annotation for At1g11300 in TAIR10 is incorrect. This locus has been split into two At1g11300 (symbol: EGM1) and At1g11305 (symbol: EGM2) (Olivier Loudet, personal communication, 2013-04-03). See Comment field for revised annotation.
647	AT1G11330	RESISTANT TO DFPM INHIBITION OF ABA SIGNALING 2 (RDA2)	S-locus lectin protein kinase family protein
648	AT1G11340		G-type lectin S-receptor-like Serine/Threonine-kinase
649	AT1G11350	S-DOMAIN-1 13 (SD1-13)	S-domain-1 13
650	AT1G11360		Adenine nucleotide alpha hydrolases-like superfamily protein
651	AT1G11370		Pectin lyase-like superfamily protein
652	AT1G11380		PLAC8 family protein
653	AT1G11390	ACTIVITY OF BC1 COMPLEX KINASE 10A (ABC1K10A)	Atypical kinase which functions in plant salt stress tolerance by regulating reactive oxygen species (ROS).
654	AT1G11410		S-locus lectin protein kinase family protein
655	AT1G11420	DOMAIN OF UNKNOWN FUNCTION 724 2 (DUF2)	Member of the plant-specific DUF724 protein family. Arabidopsis has 10 DUF724 proteins.
656	AT1G11430	MULTIPLE ORGANELLAR RNA EDITING FACTOR 9 (MORF9)	Encodes a protein involved in RNA editing in chloroplasts. The mRNA is cell-to-cell mobile.
657	AT1G11440		hypothetical protein
658	AT1G11460	USUALLY MULTIPLE ACIDS MOVE IN AND OUT TRANSPORTERS 26 (UMAMIT26)	nodulin MtN21-like transporter family protein
659	AT1G11470		Pentatricopeptide repeat (PPR) superfamily protein
660	AT1G11480		eukaryotic translation initiation factor-like protein
661	AT1G11530	C-TERMINAL CYSTEINE RESIDUE IS CHANGED TO A SERINE 1 (CXXS1)	Encodes a monocysteinic thioredoxin, thioredoxin in which the second cysteine of the redox site is replaced by a serine, with low disulfide reductase but efficient disulfide isomerase activity. The mRNA is cell-to-cell mobile.
662	AT1G11540		Sulfite exporter TauE/SafE family protein
663	AT1G11545	XYLOGLUCAN ENDOTRANSGLUCOSYLASE/HYDROLASE 8 (XTH8)	xyloglucan endotransglucosylase/hydrolase 8
664	AT1G11560		Oligosaccharyltransferase complex/magnesium transporter family protein
665	AT1G11570	NTF2-LIKE (NTL)	NTF2-like protein
666	AT1G11580	METHYLESTERASE PCR A (PMEPCRA)	methylesterase PCR A
667	AT1G11590	(PME19)	Plant invertase/pectin methylesterase inhibitor superfamily
668	AT1G11600	CYTOCHROME P450, FAMILY 77, SUBFAMILY B, POLYPEPTIDE 1 (CYP77B1)	Plant specific fatty acid epoxygenase.
669	AT1G11610	CYTOCHROME P450, FAMILY 71, SUBFAMILY A, POLYPEPTIDE 18 (CYP71A18)	putative cytochrome P450
670	AT1G11630	PENTATRICOPEPTIDE REPEAT 336 (PPR336L)	Ribosomal pentatricopeptide repeat protein
671	AT1G11670		MATE efflux family protein
672	AT1G11680	CYTOCHROME P450 51G1 (CYP51G1)	putative obtusifoliol 14-alpha demethylase involved in sterol biosynthesis. The mRNA is cell-to-cell mobile.
673	AT1G11690		BRANCHLESS TRICHOME-like protein
674	AT1G11700		senescence regulator (Protein of unknown function, DUF584)
675	AT1G11710		Pentatricopeptide repeat (PPR) superfamily protein
676	AT1G11720	STARCH SYNTHASE 3 (SS3)	Encodes a starch synthase that in addition to its role in starch biosynthesis also has a negative regulatory function in the biosynthesis of transient starch. The protein apparently contains a starch-binding domain (SBD).
677	AT1G11730		Galactosyltransferase family protein
678	AT1G11740		ankyrin repeat family protein
679	AT1G11760	MEDIATOR 32 (MED32)	Required for expression of CBF-controlled cold-responsive genes. Required for recruitment of the Mediator complex and RNA polymerase II to CBF-controlled cold-responsive genes. MED32 has now been annotated as the MED2 subunit of the Mediator complex. Mediator tail subunit, involved in transcriptional regulation. Mediator Complex Subunit, interacts with MED23, MED5, MED16, and MED23 the Regulation…
680	AT1G11770	(ATBBE2)	Encodes an oligogalacturonide oxidase that inactivates the elicitor-active oligogalacturonides (OGs).
681	AT1G11780		oxidoreductase, 2OG-Fe(II) oxygenase family protein
682	AT1G11790	AROGENATE DEHYDRATASE 1 (ADT1)	Encodes a plastid-localized arogenate dehydratase involved in phenylalanine biosynthesis. Not less than six genes encoding ADT were identi&#64257;ed in the Arabidopsis genome: ADT1 [At1g11790]; ADT2 [At3g07630]; ADT3 [At2g27820]; ADT4 [At3g44720]; ADT5 [At5g22630]; and ADT6 [At1g08250].
683	AT1G11820		O-Glycosyl hydrolases family 17 protein
684	AT1G11850		transmembrane protein
685	AT1G11860	(GLDT)	T-protein is the aminomethyltransferase of the glycine cleavage multienzyme system GCS.
686	AT1G11915		wall-associated receptor kinase galacturonan-binding protein
687	AT1G11920		Pectin lyase-like superfamily protein
688	AT1G11950	(JMJ26)	Transcription factor jumonji (jmjC) domain-containing protein
689	AT1G11960	(OSCA1.3)	Calcium channel that is phosphorylated by BIK1 in the presence of PAMPS and required for stomatal immunity.
690	AT1G11970		Ubiquitin-like superfamily protein
691	AT1G11990		O-fucosyltransferase family protein
692	AT1G12000		Phosphofructokinase family protein
693	AT1G12010	1-AMINO-CYCLOPROPANE-1-CARBOXYLIC ACID OXIDASE 3 (ACO3)	Encodes a protein that appears to have 1-amino-cyclopropane-1-carboxylic acid oxidase activity based on mutant analyses. The mRNA is cell-to-cell mobile.
694	AT1G12020		hypothetical protein
695	AT1G12030		phosphoenolpyruvate carboxylase, putative (DUF506)
696	AT1G12040	LEUCINE-RICH REPEAT/EXTENSIN 1 (LRX1)	encodes a a chimeric leucine-rich repeat/extensin protein that regulates root hair morphogenesis and elongation. Null mutants develop root hairs that frequently abort, swell, or branch. Gene is expressed in root hair cells and protein is specifically localized in the wall of the hair proper. The mRNA is cell-to-cell mobile.
697	AT1G12070		Immunoglobulin E-set superfamily protein
698	AT1G12080		Vacuolar calcium-binding protein-like protein
699	AT1G12090	EXTENSIN-LIKE PROTEIN (ELP)	extensin-like protein (ELP)
700	AT1G12100		Bifunctional inhibitor/lipid-transfer protein/seed storage 2S albumin superfamily protein
701	AT1G12110	NRT1/ PTR FAMILY 6.3 (NPF6.3)	Encodes NRT1.1 (CHL1), a dual-affinity nitrate transporter. The protein is expressed in guard cells and function in stomatal opening. Mutants have less transpiration and are more tolerant to drought. Expressed in lateral roots. Involved in nitrate signaling which enables the plant root system to detect and exploit nitrate-rich soil patches. Comparing to the wild type, the mutant displays a strong…
702	AT1G12130	(FMOGS-OX6)	Encodes a flavin-containing monooxygenases involved in biosynthesis of aliphatic glucosinolates.
703	AT1G12150		weak chloroplast movement under blue light protein (DUF827)
704	AT1G12160	(FMOGS-OX7)	Encodes a flavin-containing monooxygenases involved in biosynthesis of aliphatic glucosinolates.
705	AT1G12180		14.7 kDa heat shock-like protein
706	AT1G12190		F-box and associated interaction domains-containing protein
707	AT1G12200	FLAVIN MONOOXYGENASE (FMO)	Putative flavin monooxygenase.
708	AT1G12210	RPS5-LIKE 1 (RFL1)	RFL1 has high sequence similarity to the adjacent disease resistance (R) gene RPS5.
709	AT1G12220	RESISTANT TO P. SYRINGAE 5 (RPS5)	Resistance gene, mediates resistance against the bacterial pathogen Pseudomonas syringae. Contains a putative nucleotide binding site composed of kinase-1a (or P-loop), kinase-2a, and putative kinase-3a domains, 13 imperfect leucine-rich repeats, a potential leucine zipper, and two uncharacterized motifs that are well conserved in products of previously isolated R genes. Confers resistance to Pse…
710	AT1G12230	(GSM2-LIKE)	Aldolase superfamily protein
711	AT1G12240	(ATBETAFRUCT4)	Encodes a vacuolar invertase betaFruct4. betaFruct4 is transported from the endoplasmic reticulum through the intermediate compartments as a membrane protein. The N-terminal cytoplasmic domain contains multiple sequence motifs that are involved at various stages in the trafficking of betaFruct4 from the ER to the central vacuole. The mRNA is cell-to-cell mobile.
712	AT1G12250	(TL20.3)	Pentapeptide repeat-containing protein
713	AT1G12260	NAC 007 (NAC007)	Encodes a NAC-domain transcription factor that is expressed in developing xylem. Over expression of this protein causes ectopic secondary cell wall growth. Complements some of the cell wall defects seen in SND1/NST1 double mutants.
714	AT1G12270	HOP1 (Hop1)	Encodes one of the 36 carboxylate clamp (CC)-tetratricopeptide repeat (TPR) proteins (Prasad 2010, Pubmed ID: 20856808) with potential to interact with Hsp90/Hsp70 as co-chaperones.
715	AT1G12280	SUPPRESSOR OF MKK1 MKK2 2 (SUMM2)	Encodes a NB-LRR protein SUMM2 involved in defense response to bacterium.
716	AT1G12290	(L5)	NLR protein localized to plasma membrane. Overexpression triggers cell death. Has myristolation site at Gly2 which is required for membrane localization.
717	AT1G12320		ankyrin repeat/KH domain protein (DUF1442)
718	AT1G12330		cyclin-dependent kinase-like protein
719	AT1G12370	PHOTOLYASE 1 (PHR1)	encodes an amino acid sequence with significant homology to the recently characterized type II photolyases. The uvr2-1 mutant is unable to remove CPDs in vivo, and plant extracts lack detectable photolyase activity , is sensitive to UV-B and is an allele
720	AT1G12430	ARMADILLO REPEAT KINESIN 3 (ARK3)	Encodes the kinesin-like protein PAK has an Armadillo motif tail and is involved in guard cell development in Arabidopsis (from Genbank record AF159052).However, no defect in stomatal complexes has been observed in loss of function mutations. It accumulates at the preprophase band (PPB) in a cell-cycle and microtubule-dependent manner and is most highly expressed in cells where the placement of t…
721	AT1G12450		SNARE associated Golgi protein family
722	AT1G12480	OZONE-SENSITIVE 1 (OZS1)	Encodes a membrane protein with 10 predicted transmembrane helices. SLAC1 is a multispanning membrane protein expressed predominantly in guard cells that plays a role in regulating cellular ion homeostasis and S-type anion currents. SLAC1 is important for normal stomatal closure in response to a variety of signals including elevated CO2, ozone, ABA, darkness, and humidity. SLAC1:GFP localizes to …
723	AT1G12490	ABA-RESPONSIVE FBA DOMAIN-CONTAINING PROTEIN 1 (AFBA1)	F-box associated ubiquitination effector family protein. Expressed in guard cells and induced by ABA. Mutants are insensitive to ABA and osmotic stressors.
724	AT1G12500		Nucleotide-sugar transporter family protein
725	AT1G12520	COPPER CHAPERONE FOR SOD1 (CCS)	Copper-zinc superoxide dismutase copper chaperone (delivers copper to the Cu-Zn superoxide dismutase). Localized to the chloroplast. Expressed in roots and shoots. Up-regulated in response to copper and senescence. The AtACC activates all three CuZnSOD activities located in three different subcellular compartments. Contains three domains, central, ATX-1 like and C-terminal. ATX-1 like domain esse…
726	AT1G12530	MODIFIER OF SNC1 9 (MOS9)	Identified in a screen for suppressors of snc1. Regulator of SNC1 and RPP4 mediated immunity. Interacts with methyltransferase ATXR7.
727	AT1G12550	HYDROXYPYRUVATE REDUCTASE 3 (HPR3)	Encodes a hydroxypyruvate reductase that reduces HP to glycerate and shows even more activity with glyoxylate, a more upstream intermediate of the photorespiratory cycle. It is likely targeted to the chloroplast where it could provide a compensatory bypass for the reduction of HP and glyoxylate within this compartment. Together with HPPR2 and TAT1 involved in the biosynthesis of pHPL from tyrosin…
728	AT1G12560	EXPANSIN A7 (EXPA7)	Member of Alpha-Expansin Gene Family. Naming convention from the Expansin Working Group (Kende et al, 2004. Plant Mol Bio). Containing a conserved root hair-specific cis-element RHE. Expressed specifically in root hair cell and involved in root hair elongation.
729	AT1G12570		Ortholog of maize IPE1 gene which is involved in pollen exine development.
730	AT1G12600		UDP-N-acetylglucosamine (UAA) transporter family
731	AT1G12610	DWARF AND DELAYED FLOWERING 1 (DDF1)	Encodes a member of the DREB subfamily A-1 of ERF/AP2 transcription factor family (DDF1). The protein contains one AP2 domain. There are six members in this subfamily, including CBF1, CBF2, and CBF3. Overexpression of this gene results in delayed flowering and dwarfism, reduction of gibberellic acid biosynthesis, and increased tolerance to high levels of salt. This gene is expressed in all tissue…
732	AT1G12630		encodes a member of the DREB subfamily A-4 of ERF/AP2 transcription factor family. The protein contains one AP2 domain. There are 17 members in this subfamily including TINY.
733	AT1G12650		rRNA biogenesis RRP36-like protein
734	AT1G12660		Predicted to encode a PR (pathogenesis-related) protein. Belongs to the plant thionin (PR-13) family with the following members: At1g66100, At5g36910, At1g72260, At2g15010, At1g12663, At1g12660.
735	AT1G12700	RNA PROCESSING FACTOR 1 (RPF1)	Encodes RNA PROCESSING FACTOR 1 (RPF1), a pentatricopeptide repeat (PPR) protein of the P-class containing canonical PPR-repeats. RPF1 is required for the 5?-end processing of the nad4 mRNA in mitochondria. Ler and other accessions impaired in processing of the nad4 mRNA 5&#8242;-end, contain a single nucleotide polymorphism (SNP) 807 nucleotides downstream of the predicted translation start codo…
736	AT1G12720		transposable_element_gene;Mutator-like transposase family, has a 1.2e-40 P-value blast match to GB:AAA21566 mudrA of transposon=MuDR (MuDr-element) (Zea mays);(source:TAIR10)
737	AT1G12740	CYTOCHROME P450, FAMILY 87, SUBFAMILY A, POLYPEPTIDE 2 (CYP87A2)	encodes a protein with cytochrome P450 domain
738	AT1G12770	EMBRYO DEFECTIVE 1586 (EMB1586)	Encodes a DEAD-box RNA helicase that localizes to mitochondria and is essential for regulating cell-to-cell transport via plasmodesmata. The mRNA is cell-to-cell mobile.
739	AT1G12790		DNA ligase-like protein
740	AT1G12800	S1 DOMAIN-CONTAINING RBP (SDP)	SDP is a chloroplast localized RNA binding protein that is required for plastid rRNA processing. Plants harboring a mutation in SDP have numerous defects including reduced chlorophyll content, poor growth, yellow leaves and abnormal chloroplasts.
741	AT1G12810		proline-rich family protein
742	AT1G12820	AUXIN SIGNALING F-BOX 3 (AFB3)	Auxin receptor involved in primary and lateral root growth inhibition in response to nitrate. Target of miR393. Induced by nitrate in primary roots.
743	AT1G12845		transmembrane protein
744	AT1G12860	SCREAM 2 (SCRM2)	Encodes ICE2 (Inducer of CBF Expression 2), a transcription factor of the bHLH family that participates in the response to deep freezing through the cold acclimation-dependent pathway. Overexpression of ICE2 results in increased tolerance to deep freezing stress after cold acclimation.
745	AT1G12880	NUDIX HYDROLASE HOMOLOG 12 (NUDT12)	nudix hydrolase homolog 12
746	AT1G12900	GLYCERALDEHYDE 3-PHOSPHATE DEHYDROGENASE A SUBUNIT 2 (GAPA-2)	glyceraldehyde 3-phosphate dehydrogenase A subunit 2
747	AT1G12940	NITRATE TRANSPORTER2.5 (NRT2.5)	member of High affinity nitrate transporter family
748	AT1G12950	ROOT HAIR SPECIFIC 2 (RHS2)	root hair specific 2
749	AT1G12960		Ribosomal protein L18e/L15 superfamily protein
750	AT1G12990		beta-1,4-N-acetylglucosaminyltransferase family protein
751	AT1G13000		transmembrane protein, putative (DUF707)
752	AT1G13030	COILIN (COILIN)	Encodes a plant coilin, a protein that in other organisms is a major structural scaffolding protein necessary for Cajal body formation, composition and activity. It has been shown to bind both U1 and U1 snRNAs in vitro.
753	AT1G13040		Pentatricopeptide repeat (PPR-like) superfamily protein
754	AT1G13050		proline-rich receptor-like kinase
755	AT1G13080	CYTOCHROME P450, FAMILY 71, SUBFAMILY B, POLYPEPTIDE 2 (CYP71B2)	cytochrome P450 monooxygenase
756	AT1G13090	CYTOCHROME P450, FAMILY 71, SUBFAMILY B, POLYPEPTIDE 28 (CYP71B28)	putative cytochrome P450
757	AT1G13100	CYTOCHROME P450, FAMILY 71, SUBFAMILY B, POLYPEPTIDE 29 (CYP71B29)	putative cytochrome P450
758	AT1G13110	CYTOCHROME P450, FAMILY 71 SUBFAMILY B, POLYPEPTIDE 7 (CYP71B7)	member of CYP71B The mRNA is cell-to-cell mobile.
759	AT1G13130		Cellulase (glycosyl hydrolase family 5) protein
760	AT1G13140	CYTOCHROME P450, FAMILY 86, SUBFAMILY C, POLYPEPTIDE 3 (CYP86C3)	member of CYP86C
761	AT1G13150	CYTOCHROME P450, FAMILY 86, SUBFAMILY C, POLYPEPTIDE 4 (CYP86C4)	member of CYP86C
762	AT1G13160		ARM repeat superfamily protein
763	AT1G13170	OSBP(OXYSTEROL BINDING PROTEIN)-RELATED PROTEIN 1D (ORP1D)	OSBP(oxysterol binding protein)-related protein 1D
764	AT1G13190		RNA-binding (RRM/RBD/RNP motifs) family protein
765	AT1G13200		F-box and associated interaction domains-containing protein
766	AT1G13210	AUTOINHIBITED CA2+/ATPASE II (ACA.l)	Autoinhibited Ca2+/ATPase II. ALA11 acts redundantly with ALA3, ALA4, ALA5, ALA9, ALA10 in root and shoot development as well as PIN trafficking and polarity .
767	AT1G13220	LITTLE NUCLEI2 (LINC2)	Encodes a nuclear coiled-coil protein related to the carrot peripheral nuclear protein NMCP1 that is involved in the determination of plant nuclear structure. Member of a small gene family in Arabidopsis containing 4 proteins (LNC1-4 or CRWN 1-4) with redundant functions in protection from oxidative damage, control of nuclear morphology and degradation of ABI5.
768	AT1G13230		Encodes a leucine-rich repeat protein pii-2. Located in the endoplasmic reticulum/plasma membrane continuum in Arabidopsis roots. Required for growth promotion and enhanced seed production mediated by the endophytic fungus Piriformospora indica in Arabidopsis.
769	AT1G13250	GALACTURONOSYLTRANSFERASE-LIKE 3 (GATL3)	Encodes a protein with putative galacturonosyltransferase activity.
770	AT1G13260	RELATED TO ABI3/VP1 1 (RAV1)	Encodes an AP2/B3 domain transcription factor which is upregulated in response to low temperature. It contains a B3 DNA binding domain. It has circadian regulation and may function as a negative growth regulator. The mRNA is cell-to-cell mobile.
771	AT1G13280	ALLENE OXIDE CYCLASE 4 (AOC4)	Encodes allene oxide cyclase. One of four genes in Arabidopsis that encode this enzyme, which catalyzes an essential step in jasmonic acid biosynthesis. Gene expression is reduced during senescence, a process that involves jasmonic acid signalling pathway.
772	AT1G13290	DEFECTIVELY ORGANIZED TRIBUTARIES 5 (DOT5)	Encodes a putative zinc finger protein (C2H2 family, type IIIA, subclass A1d) that has a WIP domain. Seedlings with mutations in DOT5 have a misaligned venation defect in their leaves and cotyledons. Additional developmental abnormalities, such as elongated petioles and aberrant phyllotaxy suggest that DOT5 is required for normal shoot and root development.
773	AT1G13300	HYPERSENSITIVITY TO LOW PI-ELICITED PRIMARY ROOT SHORTENING 1 (HRS1)	Encodes a nuclear localized member of the GARP family of transcription factors. Involved in nitrate/phosphate signaling in roots. It is transcriptionally regulated by nitrate and post transcriptionally by phosphate and functions to integrate these two nutrient signaling pathways in the root. HRS1 and HHO2 are involved in Ni cross regulation of Pi signaling. They function as transcriptional repres…
774	AT1G13310		Endosomal targeting BRO1-like domain-containing protein
775	AT1G13330	ARABIDOPSIS HOP2 HOMOLOG (AHP2)	Encodes the Arabidopsis Hop2 homologue. In other species, Hop2 is proposed to be involved in inter-homolog bias in double strand break repair.
776	AT1G13340	IST1-LIKE 6 (ISTL6)	Regulator of Vps4 activity in the MVB pathway protein
777	AT1G13350	PRP4 KINASE B (PRP4KB)	Paralog of PRP4KA.
778	AT1G13370	(HTR6)	Histone superfamily protein
779	AT1G13400	NUBBIN (NUB)	Along with JAG, it is involved in stamen and carpel development. Expression is limited to the adaxial side of lateral organs. Activated by AGAMOUS in a cal-1, ap1-1 background.
780	AT1G13410		Tetratricopeptide repeat (TPR)-like superfamily protein
781	AT1G13420	SULFOTRANSFERASE 4B (ST4B)	Encodes a sulfotransferase. Unlike the related ST4A protein (At2g14920), in vitro experiments show that this enzyme does not act brassinosteroids. ST4B is expressed in the roots and transcript levels rise in response to cytokinin treatment.
782	AT1G13470		hypothetical protein (DUF1262)
783	AT1G13540		hypothetical protein (DUF1262)
784	AT1G13570		F-box/RNI-like superfamily protein
785	AT1G13580	LAG1 LONGEVITY ASSURANCE HOMOLOG 3 (LAG13)	Encodes a ceramide synthase that together with LOH1 is essential for production of ceramides containing Very Long Chain Fatty acid VLCFA-Ceramides(mainly C 22 to 26).
786	AT1G13590	PHYTOSULFOKINE 1 PRECURSOR (PSK1)	Encodes a phytosulfokine-alpha (PSK) precursor, a unique plant peptide growth factor first described in Asparagus.
787	AT1G13600	BASIC LEUCINE-ZIPPER 58 (bZIP58)	basic leucine-zipper 58
788	AT1G13610		alpha/beta-Hydrolases superfamily protein
789	AT1G13630		Tetratricopeptide repeat (TPR)-like superfamily protein
790	AT1G13640		Phosphatidylinositol 3- and 4-kinase family protein
791	AT1G13650		hypothetical protein
792	AT1G13670	BIG GRAIN LIKE 2 (BGL2)	hypothetical protein
793	AT1G13680	PHOSPHOLIPASE C-LIKE 1 (PLCL1)	Encodes a phospholipase C-like protein that serves as a convergence point for fumonisin B1 and extracellular ATP signalling, and functions in Arabidopsis stress response to fumonisin B1.
794	AT1G13700	6-PHOSPHOGLUCONOLACTONASE 1 (PGL1)	Encodes a cytosolic 6-phosphogluconolactonase (PGL) thought to be involved in the oxidative pentose-phosphate pathway (OPPP).
795	AT1G13710	CYTOCHROME P450, FAMILY 78, SUBFAMILY A, POLYPEPTIDE 5 (CYP78A5)	Encodes the cytochrome P450 CYP78A5 monooxygenase. Contributes to the generation of a growth-stimulating signal distinct from the classical phytohormones that prevents proliferation arrest, promoting organ growth. In ovules it is required for megagametogenesis, maternal control of seed size and restricting megaspore mother cell fate to a single cell.
796	AT1G13740	ABI FIVE BINDING PROTEIN 2 (AFP2)	Encodes a member of a small plant-specific gene family whose members interact with ABI5 and appear to be involved in mediating stress responses. AFP2 mutants affect a number of ABA mediated processes such as germination and response to osmotic and sugar stress. AFP2 nuclear localization is stress dependent.
797	AT1G13750	PURPLE ACID PHOSPHATASE 1 (PAP1)	Encodes a purple acid phosphatase whose expression is responsive to both phosphate (Pi) and phosphite (Phi) in roots.
798	AT1G13760		hypothetical protein
799	AT1G13790	FACTOR OF DNA METHYLATION 4 (FDM4)	Belongs to a subgroup of SGS3-like proteins that act redundantly in RNA-directed DNA methylation: AT1G15910 (FDM1), AT4G00380 (FDM2), AT3G12550 (FDM3), AT1G13790 (FDM4), AT1G80790 (FDM5).
800	AT1G13800	EMBRYONIC FACTOR 19 (FAC19)	Encodes a PPR (pentatricopeptide repeat motif) protein that is essential for the initiation of zygotic embryogenesis.
801	AT1G13810		Restriction endonuclease, type II-like superfamily protein
802	AT1G13830		Carbohydrate-binding X8 domain superfamily protein
803	AT1G13870	DEFORMED ROOTS AND LEAVES 1 (DRL1)	Encodes a homolog of the yeast TOT4/KTI12 protein. Yeast TOT4/KTI12 associates with Elongator, a multisubunit complex that binds the RNA polymerase II transcription elongation complex. Ds insertion mutant has enlarged shoot apical region, 4 to 6 long slender leaves followed by spike-like structures, short roots. Mutants also have no ncm5U (5-carbamoylmethyluridine).
804	AT1G13890	SOLUBLE N-ETHYLMALEIMIDE-SENSITIVE FACTOR ADAPTOR PROTEIN 30 (SNAP30)	Encodes a member of a gene family homologous to mammalian SNAP25, a type of SNARE proteins with two chains. There are three members in Arabidopsis: SNAP30, SNAP29, and SNAP33.
805	AT1G13910		Leucine-rich repeat (LRR) family protein
806	AT1G13920		Remorin family protein
807	AT1G13930		Involved in response to salt stress. Knockout mutants are hypersensitive to salt stress. The mRNA is cell-to-cell mobile.
808	AT1G13950	EUKARYOTIC ELONGATION FACTOR 5A-1 (ELF5A-1)	Encodes eukaryotic translation initiation factor 5A (EIF-5A).In mammalian cells it functions as a shuttle protein that translocates mRNA from the nucleus to cytoplasmic ribosomes. Overexpression results in an increase in both primary and secondary xylem formation. In RNAi suppressed lines, xylem formation is reduced.
809	AT1G13960	WRKY DNA-BINDING PROTEIN 4 (WRKY4)	Encodes WRKY DNA-binding protein 4 (WRKY4).
810	AT1G13980	GNOM (GN)	Encodes a GDP/GTP exchange factor for small G-proteins of the ADP ribosylation factor (RAF) class, and as regulator of intracellular trafficking. Homologous to Sec7p and YEC2 from yeast. Involved in the specification of apical-basal pattern formation. Essential for cell division, expansion and adhesion. It appears that heteotypic binding between the DCB and C-terminal domains of two GNOM proteins…
811	AT1G13990		plant/protein
812	AT1G14000	VH1-INTERACTING KINASE (VIK)	Encodes a protein with similarity to members of the C1 subgroup of MAP kinase kinase kinases. Interacts physically with the receptor kinase BRL2/VH1 and appears to be involved in auxin and brassinosteriod signaling. The mRNA is cell-to-cell mobile.
813	AT1G14030	LYSINE METHYLTRANSFERASE (LSMT)-LIKE (LSMT-L)	Encodes a lysine methyltransferase whose main soluble physiological substrates are chloroplastic fructose 1,6-bisphosphate aldolases, FBA1, FBA2, and FBA3. Lysines near the C-terminal end of the target proteins are trimethylated.
814	AT1G14040	PHO1 HOMOLOG 3 (PHO1;H3)	Encodes a PHO1 homologue that is upregulated in response to Zn deficiency and is involved in Pi homeostasis in response to Zn deficiency. The mRNA is cell-to-cell mobile.
815	AT1G14050
816	AT1G14070	FUCOSYLTRANSFERASE 7 (FUT7)	member of Xyloglucan fucosyltransferase family
817	AT1G14080	FUCOSYLTRANSFERASE 6 (FUT6)	Encodes an alpha-(1,2)-fucosyltransferase.
818	AT1G14090		pseudogene of Pentatricopeptide repeat (PPR) superfamily protein
819	AT1G14100	FUCOSYLTRANSFERASE 8 (FUT8)	member of Glycosyltransferase Family- 37. FUT8 was previously associated to AT1G14110
820	AT1G14110	FUCOSYLTRANSFERASE 9 (FUT9)	member of xyloglucan fucosyltransferase family
821	AT1G14120	AUXIN OXIDASE (ATDAO2)	DAO2 is an IAA oxidase expressed in root caps. it is a member of a family of dioxygenase and 2OG Fe(II) oxygenase domain and DAO domain containing proteins. It is expressed specifically in root cap cells and does not appear to be the major IAA oxidase in planta.
822	AT1G14150	PHOTOSYNTHETIC NDH SUBCOMPLEX L 2 (PnsL2)	Encodes a subunit of the NAD(P)H dehydrogenase complex located in the chloroplast thylakoid lumen.
823	AT1G14190		Glucose-methanol-choline (GMC) oxidoreductase family protein
824	AT1G14200	(SNIPER1)	E3 ligase involved in the regulation of the homeostasis of sensor NLR immune receptors.
825	AT1G14210		Ribonuclease T2 family protein
826	AT1G14220		Ribonuclease T2 family protein
827	AT1G14240	APYRASE3 (APY3)	GDA1/CD39 nucleoside phosphatase family protein
828	AT1G14250		GDA1/CD39 nucleoside phosphatase family protein
829	AT1G14260		RING/FYVE/PHD zinc finger superfamily protein
830	AT1G14270		CAAX amino terminal protease family protein
831	AT1G14280	PHYTOCHROME KINASE SUBSTRATE 2 (PKS2)	Encodes phytochrome kinase substrate 2. PKS proteins are critical for hypocotyl phototropism. Forms a complex with Phot1, Phot2 and NPH3.
832	AT1G14290	SPHINGOID BASE HYDROXYLASE 2 (SBH2)	Encodes one of the two redundant sphingoid base hydroxylases (SBH). Involved in sphingolipid trihydroxy long-chain base (4-hydroxysphinganine) biosynthesis. Double mutants of SBHs were dwarfed and not able to progress from vegetative to reproductive growth.
833	AT1G14300		ARM repeat superfamily protein
834	AT1G14330		Galactose oxidase/kelch repeat superfamily protein
835	AT1G14340	BPA1-LIKE 3 (BPL3)	ACD11 binding partner, negatively regulates ROS-mediated defense response.
836	AT1G14345		NAD(P)-linked oxidoreductase superfamily protein
837	AT1G14350	FOUR LIPS (FLP)	Encodes a putative MYB transcription factor involved in stomata development, loss of FLP activity results in a failure of guard mother cells (GMCs) to adopt the guard cell fate, thus they continue to divide resulting in abnormal stomata consisting of clusters of numerous guard cell-like cells. This phenotype is enhanced in double mutants with MYB88. Its transcript levels change after inducing MUT…
838	AT1G14370	PROTEIN KINASE 2A (APK2A)	Encodes protein kinase APK2a. Protein is N-myristoylated.
839	AT1G14390		Leucine-rich repeat protein kinase family protein
840	AT1G14410	WHIRLY 1 (WHY1)	Encodes a homolog of the potato p24 protein. Binds single strand telomeric repeats. Negatively regulates telomerase activity and telomere length.
841	AT1G14420	(AT59)	Pectate lyase family protein
842	AT1G14430	GALACTOSE OXIDASE-LIKE 5 (GOXL5)	Galactose oxydase; may function in tissues that require mechanical reinforcements in the absence of lignification.
843	AT1G14440	HOMEOBOX PROTEIN 31 (HB31)	homeobox protein 31
844	AT1G14450		NADH dehydrogenase (ubiquinone)s
845	AT1G14460		AAA-type ATPase family protein
846	AT1G14470		Pentatricopeptide repeat (PPR) superfamily protein
847	AT1G14480		Ankyrin repeat family protein
848	AT1G14490	AT-HOOK MOTIF NUCLEAR LOCALIZED PROTEIN 28 (AHL28)	Putative AT-hook DNA-binding family protein
849	AT1G14520	MYO-INOSITOL OXYGENASE 1 (MIOX1)	Encodes MIOX1. Belongs to myo-inositol oxygenase gene family.
850	AT1G14530	TOM THREE HOMOLOG 1 (THH1)	tobamovirus multiplication-like protein (DUF1084)
851	AT1G14540	PEROXIDASE 4 (PER4)	Class III peroxidase cell wall-targeted protein localized to the micropylar endosperm facing the radicle. Involved in seed germination.
852	AT1G14550		Peroxidase superfamily protein
853	AT1G14580	BLUEJAY (BLJ)	C2H2-like zinc finger protein
854	AT1G14620	DECOY (DECOY)	decoy
855	AT1G14660	NA+/H+ EXCHANGER 8 (NHX8)	member of putative Na+/H+ antiporter (AtNHX) family. Functions as a plasma membrane Li+/H+ antiporter. Involved in Li+ efflux and detoxification.
856	AT1G14670		Endomembrane protein 70 protein family
857	AT1G14680		early endosome antigen
858	AT1G14685	BASIC PENTACYSTEINE 2 (BPC2)	Encodes a member of the BASIC PENTACYSTEINE (BPC) proteins. BPC proteins are plant-specific transcription factors present throughout land plants. BPC transcription factor family is integral for a wide range of processes that support normal growth and development.Along with BPC1, BPC2 binds to the promoter of and represses GALS1 thereby reducing beta 1,4- galactan accumulation.
859	AT1G14687	HOMEOBOX PROTEIN 32 (HB32)	homeobox protein 32
860	AT1G14690	MICROTUBULE-ASSOCIATED PROTEIN 65-7 (MAP65-7)	microtubule-associated protein 65-7
861	AT1G14700	PURPLE ACID PHOSPHATASE 3 (PAP3)	purple acid phosphatase 3
862	AT1G14710		hydroxyproline-rich glycoprotein family protein
863	AT1G14720	XYLOGLUCAN ENDOTRANSGLUCOSYLASE/HYDROLASE 28 (XTH28)	member of Glycoside Hydrolase Family 16
864	AT1G14730		Cytochrome b561/ferric reductase transmembrane protein family
865	AT1G14740	TITANIA 1 (TTA1)	Encodes a PHD-finger protein that, with TTA1, is redundantly required for MP-dependent embryonic root meristem initiation.
866	AT1G14760	KNOX ARABIDOPSIS THALIANA MEINOX (KNATM)	Encodes a novel Arabidopsis KNOX gene that encodes a MEINOX domain but lacks the homeodomain and interacts with TALE-class homeodomain proteins to modulate their activities
867	AT1G14770		RING/FYVE/PHD zinc finger superfamily protein
868	AT1G14780		MAC/Perforin domain-containing protein
869	AT1G14790	RNA-DEPENDENT RNA POLYMERASE 1 (RDR1)	Encodes RNA-dependent RNA polymerase. While not required for virus-induced post-transcriptional gene silencing (PTGS), it can promote turnover of viral RNAs in infected plants. Nomenclature according to Xie, et al. (2004). Involved in the production of Cucumber Mosaic Virus siRNAs.
870	AT1G14800		Nucleic acid-binding, OB-fold-like protein
871	AT1G14810		encodes an aspartate semialdehyde dehydrogenase, which produces the branch point intermediate for lysine and threonine/methionine biosynthesis
872	AT1G14820		Sec14p-like phosphatidylinositol transfer family protein
873	AT1G14830	DYNAMIN-LIKE 1C (DL1C)	Encodes a dynamin-like protein that is involved in mitochondrial morphogenesis and pollen development. Protein is localized as speckles in the cytoplasm, partially co-localizes with mitochondrial markers, cell plate of dividing cells, and the tip of root hairs, root cap cells, and expanding part of trichoblasts.
874	AT1G14840	MICROTUBULE-ASSOCIATED PROTEINS 70-4 (MAP70-4)	Encodes a microtubule associated protein (MAP70-4). Expressed in all tissues.
875	AT1G14850	NUCLEOPORIN 155 (NUP155)	Encodes a protein similar to nucleoporin, a a major component of the nuclear pore complex (NPC) involved in cellular nucleo-cytoplasmic transport
876	AT1G14870	PLANT CADMIUM RESISTANCE 2 (PCR2)	PCR2 encodes a membrane protein involved in zinc transport and detoxification.
877	AT1G14890		Plant invertase/pectin methylesterase inhibitor superfamily protein
878	AT1G14910	(PICALM1B)	ANTH domain-containing protein which functions as adaptor protein for clathrin-mediated endocytosis (CME) of the secretory vesicle-associated longintype R-SNARE VAMP72 group. Interacts with the SNARE domain of VAMP72 and clathrin at the plasma membrane. Required for recycling of R-SNARE proteins.
879	AT1G14930		Polyketide cyclase/dehydrase and lipid transport superfamily protein
880	AT1G14940		Polyketide cyclase/dehydrase and lipid transport superfamily protein
881	AT1G14950		Polyketide cyclase/dehydrase and lipid transport superfamily protein
882	AT1G14960		Polyketide cyclase/dehydrase and lipid transport superfamily protein
883	AT1G14980	CHAPERONIN 10 (CPN10)	Encodes mitochondrial-localized chaperonin 10 that complements the E.coli groES mutant. Its mRNA is upregulated in response to heat shock treatment and is expressed uniformly in various organs.
884	AT1G14990		transmembrane protein
885	AT1G15000	SERINE CARBOXYPEPTIDASE-LIKE 50 (scpl50)	serine carboxypeptidase-like 50
886	AT1G15010		mediator of RNA polymerase II transcription subunit
887	AT1G15020	QUIESCIN-SULFHYDRYL OXIDASE 1 (QSOX1)	Encodes a protein disulfide isomerase-like (PDIL) protein, a member of a multigene family within the thioredoxin (TRX) superfamily. This protein also belongs to the quiescin-sulfhydryl oxidase (QSOX) family, which possess an Erv1-like domain at the COOH terminus in addition to a TRX domain.
888	AT1G15040	GLUTAMINE AMIDOTRANSFERASE 1_2.1 (GAT1_2.1)	Encodes a nitrogen regulated putative glutamine amidotransferase that represses shoot branching.
889	AT1G15045
890	AT1G15050	INDOLE-3-ACETIC ACID INDUCIBLE 34 (IAA34)	Belongs to auxin inducible gene family.
891	AT1G15080	LIPID PHOSPHATE PHOSPHATASE 2 (LPP2)	Encodes phosphatidic acid phosphatase. Involved in ABA signaling. Functions as a negative regulator upstream of ABI4. Expressed during germination and seed development. Expressed overall in young seedlings, in roots, hypocotyls, and vascular cells of cotyledons and leaves of 10 day-old seedlings, in flower filaments and stem elongation zones. Not expressed in anthers, pollen nor petals.
892	AT1G15100	RING-H2 FINGER A2A (RHA2A)	Encodes a putative RING-H2 finger protein RHA2a.
893	AT1G15140	FERREDOXIN-NADP(+) OXIDOREDUCTASE -LIKE (FNRL)	FAD/NAD(P)-binding oxidoreductase
894	AT1G15150		MATE efflux family protein
895	AT1G15170		MATE efflux family protein
896	AT1G15180		MATE efflux family protein
897	AT1G15190	FASCICLIN-LIKE ARABINOGALACTAN PROTEIN 19 (FLA19)	Fasciclin-like arabinogalactan protein. Possibly involved in embryogenesis and seed development.
898	AT1G15210	ATP-BINDING CASSETTE G35 (ABCG35)	pleiotropic drug resistance 7
899	AT1G15220	(CCMH)	Encodes a protein with oxidoreductase activity present in the inner membrane of mitochondria. CCMH is postulated to play a central role in mitochondrial cytochrome c maturation, probably as part of a heme lyase complex that also holds activity of reducing apocytochrome c. CCMH interacts with apocytochrome AtCYTc-a and is shown to be present in a 500 kDa-complex along with CcmFN2.
900	AT1G15230		hypothetical protein
901	AT1G15250	(RPL37A)	cytosolic ribosomal protein gene, part of eL20 family
902	AT1G15260		LOW protein: ATP-dependent RNA helicase-like protein
903	AT1G15290	REDUCED CHLOROPLAST COVERAGE 3 (REC3)	Encodes REDUCED CHLOROPLAST COVERAGE 3 (REC3). Contributes to establishing the size of the chloroplast compartment.
904	AT1G15300	CYTOSLEEPER (CYTOSLEEPER)	transposable_element_gene;hAT-like transposase family (hobo/Ac/Tam3), has a 5.1e-59 P-value blast match to GB:CAA29005 ORFa of Maize Ac (hAT-element) (Zea mays);(source:TAIR10)
905	AT1G15310	SIGNAL RECOGNITION PARTICLE 54 KDA SUBUNIT (ATHSRP54A)	54 kDa protein subunit of SRP that interacts with the signal peptide of secreted proteins
906	AT1G15320	(INP2)	seed dormancy control protein
907	AT1G15330		Cystathionine beta-synthase (CBS) protein
908	AT1G15340	METHYL-CPG-BINDING DOMAIN 10 (MBD10)	Protein containing methyl-CpG-binding domain.Has sequence similarity to human MBD proteins.
909	AT1G15350		DUF4050 family protein
910	AT1G15360	SHINE 1 (SHN1)	Encodes a member of the ERF (ethylene response factor) subfamily B-6 of ERF/AP2 transcription factor family. The protein contains one AP2 domain. There are 12 members in this subfamily including RAP2.11. This gene is involved in wax biosynthesis. Over-expression of the gene results in glossy leaf phenotype and increased drought tolerance. Two closely related genes, AT5G25390 and AT5G11190 have si…
911	AT1G15380	GLYOXYLASE I 4 (GLYI4)	Glyoxalase which affects ABA?JA crosstalk. Member of the GLYI family. glyI4 mutant plants show a general stress phenotype characterized by compromised MG scavenging, accumulation of reactive oxygen species (ROS), stomatal closure, andreduced fitness was observed.
912	AT1G15390	PEPTIDE DEFORMYLASE 1A (PDF1A)	encodes a peptide deformylase-like protein. Removes N-formyl groups, a prerequisite for the action of methionine aminopeptidase during protein synthesis. Targeted to mitochondria. Requires Zn for catalysis.
913	AT1G15400	MAPK SUBSTRATES IN THE STOMATAL LINEAGE 2 (MASS2)	Tightly connected with MAPK signaling to fine-tune stomatal production and patterning.
914	AT1G15410		aspartate-glutamate racemase family
915	AT1G15425
916	AT1G15430		hypothetical protein (DUF1644)
917	AT1G15440	PERIODIC TRYPTOPHAN PROTEIN 2 (PWP2)	Encodes a nucleolar protein that is a ribosome biogenesis co-factor. Mutants display aberrant RNA processing and female gametophyte development.
918	AT1G15460	REQUIRES HIGH BORON 4 (BOR4)	Encodes a efflux-type boron transporter. Over-expression improved plant growth under B toxic conditions.
919	AT1G15480	PRECOCIOUS1 (POCO1)	PPR motif containing protein. Found in mitochondria. Mutants flower early and have reduced levels of the ABI5, a regulator of FLC expression.
920	AT1G15510	EARLY CHLOROPLAST BIOGENESIS2 (ECB2)	Encodes a pentatricopeptide repeat protein required for chloroplast transcript accD RNA editing and early chloroplast biogenesis.
921	AT1G15520	ATP-BINDING CASSETTE G40 (ABCG40)	ABC transporter family involved in ABA transport and resistance to lead. Localizes to plasma membrane. Upregulated by lead. Expressed in leaves, flowers, stomata and roots.
922	AT1G15530	L-TYPE LECTIN RECEPTOR KINASE S.1 (LECRK-S.1)	Concanavalin A-like lectin protein kinase family protein
923	AT1G15550	GIBBERELLIN 3-OXIDASE 1 (GA3OX1)	Involved in later steps of the gibberellic acid biosynthetic pathway. Activated by AGAMOUS in a cal-1, ap1-1 background. Deletion of 208 bp from -1016 to -809 (&#916;-808) resulted in loss of GA-negative feedback (this sequence, which contains a 43-bp sequence GNFEI, was shown to be sufficient for GA-negative feedback).
924	AT1G15580	INDOLE-3-ACETIC ACID INDUCIBLE 5 (IAA5)	auxin induced protein
925	AT1G15590		E3 ubiquitin-protein ligase
926	AT1G15600		transmembrane protein
927	AT1G15640		transmembrane protein
928	AT1G15670	KISS ME DEADLY 2 (KMD2)	Encodes a member of a family of F-box proteins, called the KISS ME DEADLY (KMD) family, that targets type-B ARR proteins for degradation and is involved in the negative regulation of the cytokinin response. Also named as KFB1, a member of a group of Kelch repeat F-box proteins that negatively regulate phenylpropanoid biosynthesis by targeting the phenypropanoid biosynthesis enzyme phenylalanine a…
929	AT1G15700	(ATPC2)	One of two genes that encode the gamma subunit of Arabidopsis chloroplast ATP synthase. It is thought to be involved in the regulation of the ATP synthase activity.
930	AT1G15710	TYRA AROGENATE DEHYDROGENASE 2 (TYRA2)	prephenate dehydrogenase family protein
931	AT1G15730		Cobalamin biosynthesis CobW-like protein
932	AT1G15780	NON-RECOGNITION-OF-BTH 4 (NRB4)	mediator of RNA polymerase II transcription subunit 15a-like protein
933	AT1G15790		mediator of RNA polymerase II transcription subunit 15a-like protein
934	AT1G15800		hypothetical protein
935	AT1G15810		S15/NS1, RNA-binding protein
936	AT1G15820	LIGHT HARVESTING COMPLEX PHOTOSYSTEM II SUBUNIT 6 (LHCB6)	Lhcb6 protein (Lhcb6), light harvesting complex of photosystem II.
937	AT1G15830		hypothetical protein
938	AT1G15840		hypothetical protein
939	AT1G15850		Transducin/WD40 repeat-like superfamily protein
940	AT1G15870		Mitochondrial glycoprotein family protein
941	AT1G15880	GOLGI SNARE 11 (GOS11)	Golgi SNARE 11 protein (GOS11)
942	AT1G15890		Disease resistance protein (CC-NBS-LRR class) family
943	AT1G15900		transmembrane protein
944	AT1G15910	FACTOR OF DNA METHYLATION 1 (FDM1)	Belongs to a subgroup of SGS3-like proteins that act redundantly in RNA-directed DNA methylation: AT1G15910 (FDM1), AT4G00380 (FDM2), AT3G12550 (FDM3), AT1G13790 (FDM4), AT1G80790 (FDM5).
945	AT1G15940	(PDS5E)	One of 5 PO76/PDS5 cohesion cofactor orthologs of Arabidopsis.
946	AT1G15960	NRAMP METAL ION TRANSPORTER 6 (NRAMP6)	member of Nramp2 family
947	AT1G15980	PHOTOSYNTHETIC NDH SUBCOMPLEX B 1 (PnsB1)	encodes a novel subunit of the chloroplast NAD(P)H dehydrogenase complex, involved in cyclic electron flow around photosystem I to produce ATP.
948	AT1G15990	CYCLIC NUCLEOTIDE GATED CHANNEL 7 (CNGC7)	Encodes a plasma membrane localized member of the cyclic nucleotide gated channel (CNGC) family that is essential for male reproductive fertility.
949	AT1G16000	OUTER ENVELOPE PROTEIN 9.1 (OEP9.1)	Member of the Arabidopsis 7-kDa OEP family. Tail-anchored (TA) membrane protein which possesses a single C-terminal transmembrane domain targeting post-translationally to plastids.
950	AT1G16030	HEAT SHOCK PROTEIN 70B (Hsp70b)	heat shock protein 70B
951	AT1G16040		phosphatidylinositol-glycan biosynthesis class F-like protein
952	AT1G16060	ARIA-INTERACTING DOUBLE AP2 DOMAIN PROTEIN (ADAP)	Encodes ADAP, an AP2-domain protein that interacts with ARIA. ADAP is a positive regulator of the ABA response and is also involved in regulating seedling growth.
953	AT1G16130	WALL ASSOCIATED KINASE-LIKE 2 (WAKL2)	Encodes a WAK-like receptor-like kinase with a cytoplasmic Ser/Thr protein kinase domain and an extracellular domain with EGF-like repeats.
954	AT1G16150	WALL ASSOCIATED KINASE-LIKE 4 (WAKL4)	Encodes a WAK-like receptor-like kinase with a cytoplasmic Ser/Thr protein kinase domain and an extracellular domain with EGF-like repeats. Likely involved in Arabidopsis root mineral responses to Zn2+, Cu2+, K+, Na+ and Ni+. The mRNA is cell-to-cell mobile.
955	AT1G16160	WALL ASSOCIATED KINASE-LIKE 5 (WAKL5)	WAK-like kinase The mRNA is cell-to-cell mobile.
956	AT1G16190	RADIATION SENSITIVE23A (RAD23A)	Encodes a member of the RADIATION SENSITIVE23 (RAD23) family: AT1G16190(RAD23A), AT1G79650(RAD23B), AT3G02540(RAD23C), AT5G38470(RAD23D). RAD23 proteins play an essential role in the cell cycle, morphology, and fertility of plants through their delivery of UPS (ubiquitin/26S proteasome system) substrates to the 26S proteasome.
957	AT1G16260	WALL ASSOCIATED KINASE LIKE 8 (WAKL8)	Wall-associated kinase family protein
958	AT1G16310	METAL-TOLERANCE PROTEIN 10 (MTP10)	Cation efflux family protein which affects ABA-JA crosstalk and susceptibility to Mamestra brassicae herbivory.
959	AT1G16330	CYCLIN B3;1 (CYCB3;1)	core cell cycle genes
960	AT1G16350		Aldolase-type TIM barrel family protein
961	AT1G16360		LEM3 (ligand-effect modulator 3) family protein / CDC50 family protein
962	AT1G16370	ORGANIC CATION/CARNITINE TRANSPORTER 6 (OCT6)	organic cation/carnitine transporter 6
963	AT1G16380	(ATCHX1)	member of Putative Na+/H+ antiporter family
964	AT1G16390	ORGANIC CATION/CARNITINE TRANSPORTER 3 (OCT3)	organic cation/carnitine transporter 3
965	AT1G16410	CYTOCHROME P450 79F1 (CYP79F1)	member of CYP79F The mRNA is cell-to-cell mobile.
966	AT1G16420	METACASPASE 8 (MC8)	Encodes a metacaspase (cysteine-type endopeptidase) that is involved in promoting programmed cell death in response to hydrogen peroxide (H2O2), UV light, and methyl viologen (MV). Transcript levels rise in response to UV-C, H2O2, and MV. In vitro assays demonstrate that this enzyme has a preference for cleaving after an arginine residue, and it has a pH optimum of 8.0.
967	AT1G16440	ROOT HAIR SPECIFIC 3 (RSH3)	Member of AGC VIIIa Kinase gene family. Invovled in the maintenance of (p)ppGpp level to accustom plastidial gene expression to darkness.
968	AT1G16460	RHODANESE HOMOLOGUE 2 (RDH2)	encodes a cytoplasmic thiosulfate:cyanide sulfurtransferase, activity of which increased the rhodanese activity of transgenic yeast. Can also act as a mercaptopyruvate sulfurtransferase.
969	AT1G16490	MYB DOMAIN PROTEIN 58 (MYB58)	Member of the R2R3 factor gene family.
970	AT1G16500		filamentous hemagglutinin transporter
971	AT1G16510	SMALL AUXIN UPREGULATED 41 (SAUR41)	Encodes a clade III SAUR gene with a distinctive expression pattern in root meristems. It is normally expressed in the quiescent center and cortex/endodermis initials and upon auxin stimulation, the expression is found in the endodermal layer. Overexpression studies suggest roles in cell expansion and auxin transport.
972	AT1G16530	ASYMMETRIC LEAVES 2-LIKE 9 (ASL9)	ASYMMETRIC LEAVES 2-like 9
973	AT1G16540	ABA DEFICIENT 3 (ABA3)	Encodes molybdenum cofactor sulfurase. Involved in Moco biosynthesis. Involved in the conversion of ABA-aldehyde to ABA, the last step of abscisic acid (ABA) biosynthesis. <i>sir</i> loss-of-function mutants are resistant to sirtinol, a modulator of auxin signaling.N terminal domain is similar to bacterial NifS suggesting a common mechanism for sulphur mobilization and transfer. Also involved in …
974	AT1G16590	(REV7)	putative translesion synthesis polymerase zeta subunit, homologous to Y-family DNA polymerases, contains BRCT domain. Mutants are sensitive to UV-B radiation. Gene is involved in damage-tolerance mechanisms through translesion synthesis(TLS).
975	AT1G16610	ARGININE/SERINE-RICH 45 (SR45)	Encodes SR45, a member of the highly conserved family of serine/arginine-rich (SR) proteins, which play key roles in pre-mRNA splicing and other aspects of RNA metabolism. SR45 is a spliceosome protein, interacts with SR33 and the U1-70K protein of the U1 snRNP. Also involved in plant sugar response. sr45-1 mutation confers hypersensitivity to glucose during early seedling growth.
976	AT1G16640		AP2/B3-like transcriptional factor family protein
977	AT1G16670	COLD-RESPONSIVE PROTEIN KINASE 1 (CRPK1)	Encodes a cold-activated plasma membrane protein cold-responsive protein kinase that phosphorylates 14-3-3 proteins. The phosphorylated 14-3-3 proteins shuttle from the cytosol to the nucleus, where they interact with and destabilize the key cold-responsive C-repeat-binding factor (CBF) proteins, modulate CBF stability and the response to cold stress.
978	AT1G16705		p300/CBP acetyltransferase-related protein-like protein
979	AT1G16710	HISTONE ACETYLTRANSFERASE OF THE CBP FAMILY 12 (HAC12)	Encodes an enzyme with histone acetyltransferase activity that can use both H3 and H4 histones as substrates. No single prior lysine acetylation is sufficient to block HAC12 acetylation of the H3 or H4 peptides, suggesting that HAC12 can acetylate any of several lysines present in the peptides.
980	AT1G16720	HIGH CHLOROPHYLL FLUORESCENCE PHENOTYPE 173 (HCF173)	Encodes HCF173, a protein with weak similarities to the superfamily of the short-chain dehydrogenases/reductases. HCF173 is involved in the initiation of translation of the psbA mRNA and binds a specific site in the 5' UTR of psbA mRNA. Mutants shows a high chlorophyll fluorescence phenotype (hcf) and are severely affected in the accumulation of PSII subunits. The protein HCF173 is localized in t…
981	AT1G16730	UNKNOWN PROTEIN 6 (UP6)	hypothetical protein
982	AT1G16740		Ribosomal protein L20
983	AT1G16750		GPI-anchored adhesin-like protein, putative (Protein of unknown function, DUF547)
984	AT1G16760		kinase with adenine nucleotide alpha hydrolases-like domain-containing protein
985	AT1G16770		hypothetical protein
986	AT1G16820		vacuolar ATP synthase catalytic subunit-related / V-ATPase-related / vacuolar proton pump-like protein
987	AT1G16830		Pentatricopeptide repeat (PPR) superfamily protein
988	AT1G16840		hypothetical protein
989	AT1G16850		transmembrane protein
990	AT1G16860	(SHOU4L)	Plasma membrane-localized proteins that negatively regulate cellulose synthesis by inhibiting the exocytosis of CESAs.
991	AT1G16870		mitochondrial 28S ribosomal protein S29-like protein
992	AT1G16880	ACT DOMAIN REPEATS 11 (ACR11)	Encodes a ACT domain-containing protein. The ACT domain, named after bacterial aspartate kinase, chorismate mutase and TyrA (prephenate dehydrogenase), is a regulatory domain that serves as an amino acid-binding site in feedback-regulated amino acid metabolic enzymes. The mRNA is cell-to-cell mobile.
993	AT1G16940		F-box/RNI-like/FBD-like domains-containing protein
994	AT1G16950		transmembrane protein
995	AT1G16980	TREHALOSE-PHOSPHATASE/SYNTHASE 2 (TPS2)	Encodes an enzyme putatively involved in trehalose biosynthesis. The protein has a trehalose synthase (TPS)-like domain that may or may not be active but no trehalose phosphatase (TPP)-like domain.
996	AT1G17000	TREHALOSE-PHOSPHATASE/SYNTHASE 3 (TPS3)	Encodes an enzyme putatively involved in trehalose biosynthesis. The protein has a trehalose synthase (TPS)-like domain that may or may not be active but no trehalose phosphatase (TPP)-like domain.
997	AT1G17010		2-oxoglutarate (2OG) and Fe(II)-dependent oxygenase superfamily protein
998	AT1G17020	SENESCENCE-RELATED GENE 1 (SRG1)	Encodes a novel member of the Fe(II)/ascorbate oxidase gene family; senescence-related gene.
999	AT1G17040	SH2 DOMAIN PROTEIN A (SHA)	Encodes a protein that contains an SH2 domain. It can pull down a 120-kD tyrosine-phosphorylated protein in vitro. It is predicted to act as a transcription factor.
1000	AT1G17060	CYTOCHROME P450 72C1 (CYP72C1)	Encodes a protein with similarity to other cytochrome P450's and is a homolog of BAS1. Over expression causes a dwarf phenotype resembling brassinolide resistant mutants. Double mutant analysis of sob7/bas1 loss of function mutants suggests these genes have redundant functions in light responsiveness. SOB7 may function in metabolizing brassinolides. Expressed in leaf, root, stem and silique but e…
1001	AT1G17090		transmembrane protein
1002	AT1G17100	HAEM-BINDING PROTEIN 1 (HBP1)	Encodes a cytosolic heme binding protein(cHBP)that can reversibly bind tetrapyrroles including heme, protoporphyrin IX and Mg-protoporphyrin IX dimethyl ester with distinct binding af&#64257;nities.
1003	AT1G17130	(CWC16B)	DUF572 domain protein involved in alternative splicing.
1004	AT1G17140	INTERACTOR OF CONSTITUTIVELY ACTIVE ROP 1 (ICR1)	Encodes a ROP/RAC effector, designated interactor of constitutive active ROPs 1 (ICR1), that interacts with GTP-bound ROPs. ICR1 is a scaffold mediating formation of protein complexes that are required for cell polarity. ICR1 is comprised of coiled-coil domains and forms complexes with itself and the exocyst vesicle-tethering complex subunit SEC3.
1005	AT1G17150		Pectin lyase-like superfamily protein
1006	AT1G17170	GLUTATHIONE S-TRANSFERASE TAU 24 (GSTU24)	Encodes glutathione transferase belonging to the tau class of GSTs. Naming convention according to Wagner et al. (2002). It is involved in the detoxification of the environmental pollutant 2,4,6-trinitrotoluene. Arabidopsis plants over-expressing At1g17170 were more resistant to TNT, removed more TNT from sterile and soil-based media, and had reduced levels of glutathione when grown in the presen…
1007	AT1G17180	GLUTATHIONE S-TRANSFERASE TAU 25 (GSTU25)	Encodes glutathione transferase belonging to the tau class of GSTs. Naming convention according to Wagner et al. (2002). Detoxification of the environmental pollutant 2,4,6-trinitrotoluene. Arabidopsis plant over-expressing At1g17180 were more resistant to TNT, removed more TNT from sterile and soil-based media, and had reduced levels of glutathione when grown in the presence of TNT.
1008	AT1G17190	GLUTATHIONE S-TRANSFERASE TAU 26 (GSTU26)	Encodes glutathione transferase belonging to the tau class of GSTs. Naming convention according to Wagner et al. (2002).
1009	AT1G17200	CASP-LIKE PROTEIN 2A1 (CASPL2A1)	Uncharacterized protein family (UPF0497)
1010	AT1G17220	FU-GAERI1 (FUG1)	Encodes a chloroplast localized protein with similarity to translation initiation factor 2. Can complement loss of INFB in E.coli suggesting FUG1 does function as a translation initiation factor in vivo. Identified as a suppressor of the leaf variegation mutant var2-6. Suppression is only seen in hypomorphs as complete loss of function alleles are embryo lethal. The mRNA is cell-to-cell mobile.
1011	AT1G17230		Leucine-rich receptor-like protein kinase family protein
1012	AT1G17240	RECEPTOR LIKE PROTEIN 2 (RLP2)	Encodes a CLAVATA2 (CLV2)-related gene. Complements the clv2 mutant when expressed under the control of the CLV2 promoter.
1013	AT1G17290	ALANINE AMINOTRANSFERASE (AlaAT1)	Encodes for alanine aminotransferase (ALAAT1), involved in alanine catabolism during plants recovery from hypoxia The mRNA is cell-to-cell mobile.
1014	AT1G17300		hypothetical protein
1015	AT1G17310	AGAMOUS-LIKE 100 (AGL100)	MADS-box transcription factor family protein
1016	AT1G17330	CYCLIC NUCLEOTIDEDEPENDENT PHOSPHODIESTERASE 1 (CN-PDE1)	cGMP-activated phosphodiesterase responsible for UVA induced decrease in cGMP.
1017	AT1G17360		LOW protein: protein phosphatase 1 regulatory subunit-like protein
1018	AT1G17380	JASMONATE-ZIM-DOMAIN PROTEIN 5 (JAZ5)	jasmonate-zim-domain protein 5
1019	AT1G17390		transposable_element_gene;similar to RNase H domain-containing protein [Arabidopsis thaliana] (TAIR:AT5G36905.1);(source:TAIR10)
1020	AT1G17420	LIPOXYGENASE 3 (LOX3)	LOX3 encode a Lipoxygenase. Lipoxygenases (LOXs) catalyze the oxygenation of fatty acids (FAs).
1021	AT1G17430		alpha/beta-Hydrolases superfamily protein
1022	AT1G17460	TRF-LIKE 3 (TRFL3)	Arabidopsis thaliana myb family transcription factor (At1g17460)
1023	AT1G17480	IQ-DOMAIN 7 (IQD7)	Transient expression of Pro35S:GFP-IQD7 in leaves of N. benthamiana alters microtubule organization, in patterns similar to Pro35S:GFP-IQD8 and Pro35S:GFP-IQD6.Member of IQ67 (CaM binding) domain containing family.
1024	AT1G17500	AMINOPHOSPHOLIPID ATPASE 4 (ALA4)	ATPase E1-E2 type family protein / haloacid dehalogenase-like hydrolase family protein. ALA4 acts redundantly with ALA3, ALA5, ALA9, ALA10 and ALA11 in root and shoot development
1025	AT1G17510		hypothetical protein
1026	AT1G17530	TRANSLOCASE OF INNER MITOCHONDRIAL MEMBRANE 23 (TIM23-1)	Encodes a translocase of inner mitochondrial membrane.
1027	AT1G17540		kinase with adenine nucleotide alpha hydrolases-like domain-containing protein
1028	AT1G17545		Protein phosphatase 2C family protein
1029	AT1G17560	HUELLENLOS (HLL)	Encodes HUELLENLOS (HLL), a mitochondrial ribosome protein, similar to L14 ribosomal protein of eubacteria. HLL is essential for normal ovule development.
1030	AT1G17590	NUCLEAR FACTOR Y, SUBUNIT A8 (NF-YA8)	Binds directly to CCAAT cis-elements in the promoters of multiple MIR156 genes and inhibits the juvenile-to adult transition by activating transcription of these MIR156s.
1031	AT1G17600	(SOC3)	SOC3 is a TIR-NB-leucine-rich repeat (TNL) protein.Mutants suppress loss of chs2 phenotype of auto-activation of immunity. When the TIR domain of SOC3 interacts with CHS2 the binding results in temperature activation of cell death, the suppressors inhibit this interaction.
1032	AT1G17610	CHILLING SENSITIVE 1 (CHS1)	TN-type protein that controls temperature-dependent growth and defense responses .Mutant accumulates steryl-esters at low temperatures and shows temperature dependent activation of defense responses..
1033	AT1G17615	TIR-NBS2 (TN2)	TN2 is an atypical TIR-NBS protein that lacks the LRR domain common in typical NLR receptors. It interacts with EXO70B1, a subunit of the exocyst complex. Loss of function mutants in TN2 can suppress EXO70B1 mutants suggesting that EXO70B1 acts through TN2.
1034	AT1G17620		Late embryogenesis abundant (LEA) hydroxyproline-rich glycoprotein family
1035	AT1G17630	CELL WALL MAINTAINER 1 (CWM1)	Encodes a PPR protein involved in mitochondrial functioning. Mutants suppress cell wall defects caused by C17 chemical inhibitor. Mutants are defective in cytochrome c maturation and activation of mitochondrial retrograde signalling.
1036	AT1G17640	RNA-BINDING GLYCINE-RICH PROTEIN D1 (RBGD1)	Belongs to a member of the RNA-binding glycine-rich (RBG) gene superfamily.
1037	AT1G17650	GLYOXYLATE REDUCTASE 2 (GLYR2)	Glyoxylate reductase located in chloroplasts.
1038	AT1G17665		CA-responsive protein
1039	AT1G17710	PHOSPHOETHANOLAMINE/PHOSPHOCHOLINE PHOSPHATASE 1 (PEPC1)	Encodes a phosphoethanolamine/phosphocholine phosphatase. It is likely to be involved in the liberation of inorganic phosphate from intracellular sources. Expression is upregulated in the shoot of cax1/cax3 mutant.
1040	AT1G17730	VACUOLAR PROTEIN SORTING 46.1 (VPS46.1)	Encodes an ESCRT-related protein: CHMP1A/AT1G73030; CHMP1B/AT1G17730. CHMP1A and B mediate multivesicular body sorting of auxin carriers and are required for plant development. ESCRT: Endosomal Sorting Complexes Required For Transport machinery; CHMP: Charged Multivesicular Body Protein/Chromatin Modifying Protein.
1041	AT1G17740
1042	AT1G17745	3-PHOSPHOGLYCERATE DEHYDROGENASE (PGDH)	encodes a 3-Phosphoglycerate dehydrogenase The mRNA is cell-to-cell mobile.
1043	AT1G17750	PEP1 RECEPTOR 2 (PEPR2)	Encodes PEPR2, a plasma membrane leucine-rich repeat receptor kinase functioning as a receptor for the Pep1 and Pep2 peptides. Pep1 and Pep2 are amino acids that induce the transcription of defense-related genes.
1044	AT1G17810	BETA-TONOPLAST INTRINSIC PROTEIN (BETA-TIP)	beta-tonoplast intrinsic protein (beta-TIP) mRNA, complete
1045	AT1G17830		hypothetical protein (DUF789)
1046	AT1G17840	ATP-BINDING CASSETTE G11 (ABCG11)	Encodes a plasma membrane-localized ATP-binding cassette transporter, that is required for cutin transport to the extracellular matrix. The mRNA is cell-to-cell mobile.
1047	AT1G17860	ARABIDOPSIS THALIANA KUNITZ TRYPSIN INHIBITOR 5 (ATKTI5)	Member of Kunitz trypsin inhibitor (KTI) family involved in plant defense response against spider mites.
1048	AT1G17870	ETHYLENE-DEPENDENT GRAVITROPISM-DEFICIENT AND YELLOW-GREEN-LIKE 3 (EGY3)	S2P-like putative metalloprotease, also contain transmembrane helices near their C-termini and many of them, five of seven, contain a conserved zinc-binding motif HEXXH. Homolog of EGY1. Each of the EGY1 and EGY-like proteins share two additional highly conserved motifs, the previously reported NPDG motif (aa 442?454 in EGY1, Rudner et al., 1999) and a newly defined GNLR motif (aa 171?179 in EGY1…
1049	AT1G17890	(GER2)	NAD(P)-binding Rossmann-fold superfamily protein
1050	AT1G17900		transposable_element_gene;similar to unknown protein [Arabidopsis thaliana] (TAIR:AT5G27590.1);(source:TAIR10)
1051	AT1G17910		Wall-associated kinase family protein
1052	AT1G17920	HOMEODOMAIN GLABROUS 12 (HDG12)	Encodes a homeobox-leucine zipper family protein belonging to the HD-ZIP IV family. Together with HDG11, it is involved in trichome branching.
1053	AT1G17950	MYB DOMAIN PROTEIN 52 (MYB52)	R2R3-MYB transcription family. Absence of the MYB52 transcription factor is correlated with an increase in PME activity and a decrease in the degree of pectin methylesterification. Transcriptionally activates PECTIN METHYLESTERASE INHIBITOR6 (PMEI6), PMEI14, and SUBTILISIN-LIKE SER PROTEASE1.7 (SBT1.7) by binding to their promoters.
1054	AT1G17960		Threonyl-tRNA synthetase
1055	AT1G17970	(CTL15)	RING/U-box superfamily protein
1056	AT1G17990		FMN-linked oxidoreductases superfamily protein
1057	AT1G18010		Major facilitator superfamily protein
1058	AT1G18030		Protein phosphatase 2C family protein
1059	AT1G18060	(FBN-LIKE)	localized to chloroplasts
1060	AT1G18090		5-3 exonuclease family protein
1061	AT1G18100	(E12A11)	Encodes a member of the FT and TFL1 family of phosphatidylethanolamine-binding proteins. It is expressed in seeds and up-regulated in response to ABA. Loss of function mutants show decreased rate of germination in the presence of ABA. ABA dependent regulation is mediated by both ABI3 and ABI5. ABI5 promotes MFT expression, primarily in the radicle-hypocotyl transition zone and ABI3 suppresses it …
1062	AT1G18130		Class II aaRS and biotin synthetases superfamily protein
1063	AT1G18140	LACCASE 1 (LAC1)	putative laccase, a member of laccase family of genes (with 17 members in Arabidopsis).
1064	AT1G18150	(ATMPK8)	Encodes mitogen-activated protein kinase 8 (MPK8). MPK8 connects protein phosphorylation, Ca2+, and ROS in the wound-signaling pathway.
1065	AT1G18170		FKBP-like peptidyl-prolyl cis-trans isomerase family protein
1066	AT1G18180		3-oxo-5-alpha-steroid 4-dehydrogenase (DUF1295)
1067	AT1G18200	RAB GTPASE HOMOLOG A6B (RABA6b)	Rab GTPase-like A1I protein
1068	AT1G18220	PURINE PERMEASE 9 (PUP9)	Member of a family of proteins related to PUP1, a purine transporter. May be involved in the transport of purine and purine derivatives such as cytokinins, across the plasma membrane.
1069	AT1G18280	GLYCOSYLPHOSPHATIDYLINOSITOL-ANCHORED LIPID PROTEIN TRANSFER 3 (LTPG3)	Bifunctional inhibitor/lipid-transfer protein/seed storage 2S albumin superfamily protein
1070	AT1G18290		PADRE protein up-regulated after infection by S. sclerotiorum.
1071	AT1G18310		glycosyl hydrolase family 81 protein
1072	AT1G18320	(ATTIM22)	Mitochondrial import inner membrane translocase subunit Tim17/Tim22/Tim23 family protein
1073	AT1G18330	EARLY-PHYTOCHROME-RESPONSIVE1 (EPR1)	EARLY-PHYTOCHROME-RESPONSIVE1
1074	AT1G18350	MAP KINASE KINASE 7 (MKK7)	MAP kinase kinase7. Member of plant mitogen-activated protein kinase kinase group D. Negative regulator of polar auxin transport. Overexpression leads to activation of basal and systemic acquired resistance.
1075	AT1G18360	(MAGL2)	alpha/beta-Hydrolases superfamily protein
1076	AT1G18370	HINKEL (HIK)	Encodes a kinesin HINKEL. Required for cytokinesis in pollen. Mutant has cytokinesis defects; seedling lethal.
1077	AT1G18380
1078	AT1G18390	LEAF RUST 10 DISEASE-RESISTANCE LOCUS RECEPTOR- LIKE PROTEIN KINASE-LIKE 1.2 (LRK10L1.2)	Serine/Threonine kinase family catalytic domain protein
1079	AT1G18400	BR ENHANCED EXPRESSION 1 (BEE1)	Encodes the brassinosteroid signaling component BEE1 (BR-ENHANCED EXPRESSION 1). Positively modulates the shade avoidance syndrome in Arabidopsis seedlings.
1080	AT1G18410		P-loop containing nucleoside triphosphate hydrolases superfamily protein
1081	AT1G18460	ALPHA/BETA-HYDROLASE (alpha/beta-HYD)	Alpha/beta hydrolase
1082	AT1G18480	SHEWENELLA-LIKE PROTEIN PHOSPHATASE 2 (SLP2)	Calcineurin-like metallo-phosphoesterase superfamily protein
1083	AT1G18485		Pentatricopeptide repeat (PPR) superfamily protein
1084	AT1G18500	METHYLTHIOALKYLMALATE SYNTHASE-LIKE 4 (MAML-4)	Encodes an active Arabidopsis isopropylmalate synthase IPMS1. Involved in leucine biosynthesis. Do not participate in the chain elongation of glucosinolates. Expressed constitutively throughout the plant. Loss of IPMS1 can be compensated by a second isopropylmalate synthase gene IPMS2 (At1g74040). The mRNA is cell-to-cell mobile.
1085	AT1G18510	TETRASPANIN 16 (TET16)	Member of TETRASPANIN family
1086	AT1G18520	TETRASPANIN11 (TET11)	Member of TETRASPANIN family
1087	AT1G18530	CALMODULIN LIKE 15 (CML15)	Calmodulin like protein. Paralog of CML16. Expression in flowers is restricted to anthers and mature pollen.
1088	AT1G18550		ATP binding microtubule motor family protein
1089	AT1G18570	MYB DOMAIN PROTEIN 51 (MYB51)	Encodes a member of the R2R3-MYB transcription family. Involved in indole glucosinolate biosynthesis. The mRNA is cell-to-cell mobile.
1090	AT1G18580	GALACTURONOSYLTRANSFERASE 11 (GAUT11)	Encodes a protein with putative galacturonosyltransferase activity.GAUT11 is required for pectin synthesis in seed coat epidermal cells and normal mucilage release.
1091	AT1G18590	SULFOTRANSFERASE 17 (SOT17)	encodes a desulfoglucosinolate sulfotransferase, involved in the final step of glucosinolate core structure biosynthesis. Has a broad-substrate specificity with preference with methionine-derived desulfoglucosinolates.
1092	AT1G18620	TON1 RECRUITING MOTIF 3 (TRM3)	Member of a small gene family in Arabidopsis. Quadruple mutants in this family display defects in cell elongation.
1093	AT1G18630	RNA-BINDING GLYCINE-RICH PROTEIN A1 (RBGA1)	encodes a glycine-rich RNA binding protein.
1094	AT1G18640	3-PHOSPHOSERINE PHOSPHATASE (PSP)	Encodes a 3-phosphoserine phosphatase acting in the last step of serine biosynthesis within the chloroplast. Essential for embryo, pollen and root development.
1095	AT1G18650	PLASMODESMATA CALLOSE-BINDING PROTEIN 3 (PDCB3)	Encodes a member of the X8-GPI family of proteins. It localizes to the plasmodesmata and is predicted to bind callose.
1096	AT1G18660	IAN9-ASSOCIATED PROTEIN1 (IAP1)	Membrane localized protein of unknown function. Involved in negative regulation of immune response. Mutants have increased resistance to pathogens.
1097	AT1G18670	IMPAIRED IN BABA-INDUCED STERILITY 1 (IBS1)	Encodes a cyclin-dependent kinase-like protein with a ser/thr protein kinase domain and an N-terminal myristoylation sequence. Mutants in this gene are unable to express female sterility in response to beta-aminobutyric acid, as wild type plants do.
1098	AT1G18690	XYLOGLUCAN XYLOSYLTRANSFERASE 4 (XXT4)	Galactosyl transferase GMA12/MNN10 family protein
1099	AT1G18710	MYB DOMAIN PROTEIN 47 (MYB47)	Member of the R2R3 factor gene family. Promotes seed longevity (viability of seed over time.) Expressed in the chalazal seed coat. Overexpresion enhances resistance of seed to deterioration (PMID:32519347).
1100	AT1G18730	PHOTOSYNTHETIC NDH SUBCOMPLEX B 4 (PnsB4)	likely a subunit of the chloroplast NAD(P)H dehydrogenase complex, involved in PSI cyclic electron transport. Located on the thylakoid membrane. Mutant has impaired NAD(P)H dehydrogenase activity. The mRNA is cell-to-cell mobile.
1101	AT1G18740	BYPASS1-LIKE (B1L)	DUF793 domain containing protein. Expression is induced by cold. Loss of function mutations are more sensitive to freezing and have reduced levels of CBFs. May act by preventing degradation of CBFs.
1102	AT1G18800	NAP1-RELATED PROTEIN 2 (NRP2)	Double nrp1-1 nrp2-1 mutants show arrest of cell cycle progression at G2/M and disordered cellular organization occurred in root tips. Localize in the nucleus and can form homomeric and heteromeric protein complexes with NRP1. Bind histones Histone2A and Histone2B and associate with chromatin in vivo. Plant mutated in both NRP1 and NRP2 genes show hypersensitivity to genotoxic stresses including …
1103	AT1G18810		phytochrome kinase substrate-like protein
1104	AT1G18830	(SEC31A)	Together with SEC31B a component of the coat protein complex II (COPII) which promotes the formation of transport vesicles from the endoplasmic reticulum (ER).
1105	AT1G18840	IQ-DOMAIN 30 (IQD30)	Member of IQ67 (CaM binding) domain containing family.
1106	AT1G18850	LANT-SPECIFIC COMPONENT OF THE PRE- RRNA PROCESSING COMPLEX2 (PCP2)	PCP2 encodes a novel plant specific protein that is co-expressed with components of pre-rRNA processing complex. Co-localizes with NuGWD1 and SWA1.
1107	AT1G18860	WRKY DNA-BINDING PROTEIN 61 (WRKY61)	member of WRKY Transcription Factor; Group II-b
1108	AT1G18870	ISOCHORISMATE SYNTHASE 2 (ICS2)	Encodes a protein with isochorismate synthase activity involved in phylloquinone biosynthesis. Mutant studies of this gene's function suggest that its function is redundant with that of ICS1 (AT1G7410).
1109	AT1G18880	NRT1/ PTR FAMILY 2.9 (NPF2.9)	Encodes a low-af&#64257;nity plasma membrane nitrate transporter expressed in the companion cells of root phloem.
1110	AT1G18890	CALCIUM-DEPENDENT PROTEIN KINASE 1 (CDPK1)	encodes a calcium-dependent protein kinase whose gene expression is induced by dehydration and high salt. Kinase activity could not be detected in vitro.
1111	AT1G18900		Pentatricopeptide repeat (PPR) superfamily protein
1112	AT1G18910	BRUTUS LIKE 2 (BTSL2)	E3 ubiquitin ligase that functions redundantly in the root with BTSL1 to negatively regulate iron uptake.
1113	AT1G18940		Nodulin-like / Major Facilitator Superfamily protein
1114	AT1G18950	DDT-RELATED PROTEIN4 (DDR4)	DDT domain superfamily
1115	AT1G18970	GERMIN-LIKE PROTEIN 4 (GLP4)	Encodes a germin-like protein with possible oxalate oxidase activity (based on GenBank record).
1116	AT1G18980		RmlC-like cupins superfamily protein
1117	AT1G18990		myosin-binding protein, putative (Protein of unknown function, DUF593)
1118	AT1G19010		hypothetical protein
1119	AT1G19020	SMALL DEFENSE-ASSOCIATED PROTEIN 1 (SDA1)	Modulates defense against bacterial pathogens and tolerance to oxidative stress.
1120	AT1G19030		transposable_element_gene;similar to unknown protein [Arabidopsis thaliana] (TAIR:AT5G13655.1);(source:TAIR10)
1121	AT1G19040		NAC (No Apical Meristem) domain transcriptional regulator superfamily protein
1122	AT1G19060		hypothetical protein (DUF626)
1123	AT1G19090	RECEPTOR-LIKE SERINE/THREONINE KINASE 2 (RKF2)	receptor-like serine/threonine kinase (RKF2)
1124	AT1G19100	DEFECTIVE IN MERISTEM SILENCING 11 (DMS11)	Encodes a member of the conserved Microrchidia (MORC) adenosine triphosphatase (ATPase) family, predicted to catalyze alterations in chromosome superstructure. Required for heterochromatin condensation and gene silencing.
1125	AT1G19130		RmlC-like jelly roll fold protein
1126	AT1G19150	PHOTOSYSTEM I LIGHT HARVESTING COMPLEX GENE 6 (LHCA6)	PSI type II chlorophyll a/b-binding protein (Lhca2*1) mRNA, The mRNA is cell-to-cell mobile.
1127	AT1G19160		F-box family protein
1128	AT1G19180	JASMONATE-ZIM-DOMAIN PROTEIN 1 (JAZ1)	JAZ1 is a nuclear-localized protein involved in jasmonate signaling. JAZ1 transcript levels rise in response to a jasmonate stimulus. JAZ1 can interact with the COI1 F-box subunit of an SCF E3 ubiquitin ligase in a yeast-two-hybrid assay only in the presence of jasmonate-isoleucine (JA-ILE) or coronatine. Application of jasmonate methyl ester to Arabidopsis roots reduces the levels of a JAZ1:GUS …
1129	AT1G19190	(NPF5.1)	Controls leaf stomatal aperture by regulating abscisic acid transport.
1130	AT1G19200		cyclin-dependent kinase, putative (DUF581)
1131	AT1G19210	(ERF017)	encodes a member of the DREB subfamily A-5 of ERF/AP2 transcription factor family. The protein contains one AP2 domain. There are 15 members in this subfamily including RAP2.1, RAP2.9 and RAP2.10.
1132	AT1G19220	AUXIN RESPONSE FACTOR 19 (ARF19)	Encodes an auxin response factor that contains the conserved VP1-B3 DNA-binding domain at its N-terminus and the Aux/IAA-like domains III and IV present in most ARFs at its C-terminus. The protein interacts with IAA1 (yeast two hybrid) and other auxin response elements such as ER7 and ER9 (yeast one hybrid). ARF19 protein can complement many aspects of the arf7 mutant phenotype and , together wit…
1133	AT1G19230	(ATRBOHE)	Riboflavin synthase-like superfamily protein
1134	AT1G19250	FLAVIN-DEPENDENT MONOOXYGENASE 1 (FMO1)	FMO1 is required for full expression of TIR-NB-LRR conditioned resistance to avirulent pathogens and for basal resistance to invasive virulent pathogens. Functions in an EDS1-regulated but SA-independent mechanism that promotes resistance and cell death at pathogen infection sites. FMO1 functions as a pipecolate N-hydroxylase and catalyzes the biochemical conversion of pipecolic acid to N-hydroxy…
1135	AT1G19290	TANG 2 (TANG2)	Pentatricopeptide repeat protein involved in mitochondrial RNA processing.
1136	AT1G19300	PARVUS (PARVUS)	The PARVUS/GLZ1 gene encodes a putative family 8 glycosyl transferase that contributes to xylan biosynthesis. Its gene expression shows good co-variance with the IRX3 gene involved in secondary cell wall synthesis. PARVUS/GLZ1 is predicted to have galacturonosyltransferase activity and may be involved in the formation of the complex oligosaccharide sequence present at the reducing end of xylan. P…
1137	AT1G19320		Pathogenesis-related thaumatin superfamily protein
1138	AT1G19330	SAP30 FUNCTION-RELATED 2 (AFR2)	Evening-expressed key component of Sin3-HDAC complex, which bind directly to the CIRCADIAN CLOCK ASSOCIATED 1 (CCA1) and PSEUDO-RESPONSE REGULATOR 9 (PRR9) promoters and catalyze histone 3 (H3) deacetylation at the cognate regions to repress expression, allowing the declining phase of their expression at dusk.
1139	AT1G19340		Methyltransferase MT-A70 family protein
1140	AT1G19370		membrane protein
1141	AT1G19380		sugar, putative (DUF1195)
1142	AT1G19390		Wall-associated kinase family protein
1143	AT1G19410		FBD / Leucine Rich Repeat domains containing protein
1144	AT1G19430		S-adenosyl-L-methionine-dependent methyltransferases superfamily protein
1145	AT1G19450		Major facilitator superfamily protein
1146	AT1G19470		Galactose oxidase/kelch repeat superfamily protein
1147	AT1G19500		hypothetical protein
1148	AT1G19510	RAD-LIKE 5 (RL5)	RAD-like 5
1149	AT1G19520	NUCLEAR FUSION DEFECTIVE 5 (NFD5)	Ribosomal pentatricopeptide repeat protein
1150	AT1G19530	RGA TARGET 1 (RGAT1)	Direct target of RGA, plays an essential role in GA-mediated tapetum and pollen development.
1151	AT1G19540		NmrA-like negative transcriptional regulator family protein
1152	AT1G19570	(PMID:28381499).	Encodes a member of the dehydroascorbate reductase gene family. Critical for a mutualistic symbiosis between the host Arabidopsis and the root colonizing fungus Piriformospora indica.Encodes about 50-60% of extractable leaf GSH-dependent DHAR activity, but single knockout mutants show unaltered ascorbate and glutathione status in optimal and oxidative stress conditions (PMID:28381499). Acts redun…
1153	AT1G19600		pfkB-like carbohydrate kinase family protein
1154	AT1G19610	(PDF1.4)	Predicted to encode a PR (pathogenesis-related) protein. Belongs to the plant defensin (PDF) family with the following members: At1g75830/PDF1.1, At5g44420/PDF1.2a, At2g26020/PDF1.2b, At5g44430/PDF1.2c, At2g26010/PDF1.3, At1g19610/PDF1.4, At1g55010/PDF1.5, At2g02120/PDF2.1, At2g02100/PDF2.2, At2g02130/PDF2.3, At1g61070/PDF2.4, At5g63660/PDF2.5, At2g02140/PDF2.6, At5g38330/PDF3.1 and At4g30070/PDF…
1155	AT1G19620		transmembrane protein
1156	AT1G19630	CYTOCHROME P450, FAMILY 722, SUBFAMILY A, POLYPEPTIDE 1 (CYP722A1)	cytochrome P450, family 722, subfamily A, polypeptide 1
1157	AT1G19640	JASMONIC ACID CARBOXYL METHYLTRANSFERASE (JMT)	Encodes a S-adenosyl-L-methionine:jasmonic acid carboxyl methyltransferase that catalyzes the formation of methyljasmonate from jasmonic acid. Its expression is induced in response to wounding or methyljasmonate treatment.
1158	AT1G19660	BIFUNCTIONAL NUCLEASE IN BASAL DEFENSE RESPONSE 2 (BBD2)	Wound-responsive family protein
1159	AT1G19670	CHLOROPHYLLASE 1 (CLH1)	Chlorophyllase is the first enzyme involved in chlorophyll degradation. It catalyzes the hydrolysis of the ester bond to yield chlorophyllide and phytol. AtCLH1 lacks a typical signal sequence for the chloroplast. Its expression is induced rapidly by methyljasmonate, a known promoter of senescence and chlorophyll degradation.
1160	AT1G19680		RING/U-box superfamily protein
1161	AT1G19700	BEL1-LIKE HOMEODOMAIN 10 (BEL10)	Encodes a member of the BEL family of homeodomain proteins. Its interaction with PLP (PAS/LOV PROTEIN) is diminished by blue light.
1162	AT1G19710		UDP-Glycosyltransferase superfamily protein
1163	AT1G19720		Pentatricopeptide repeat (PPR-like) superfamily protein
1164	AT1G19730	(ATTRX4)	encodes a cytosolic thioredoxin that reduces disulfide bridges of target proteins by the reversible formation of a disulfide bridge between two neighboring Cys residues present in the active site. Thioredoxins have been found to regulate a variety of biological reactions in prokaryotic and eukaryotic cells.
1165	AT1G19740	LON DOMAIN-CONTAINING PROTEIN 1 (LCP1)	Chloroplast localized ATP-dependent protease La (LON) domain protein. Mutants are defective in anther dehiscence due to defects in lignification that may result from mis regulation of ROS scavenging enzymes.
1166	AT1G19780	CYCLIC NUCLEOTIDE GATED CHANNEL 8 (CNGC8)	Encodes a member of the cyclic nucleotide gated channel (CNGC) family that is essential for male reproductive fertility.
1167	AT1G19830	SMALL AUXIN UPREGULATED RNA 54 (SAUR54)	SAUR-like auxin-responsive protein family
1168	AT1G19835	TRICHOME CELL SHAPE 1 (TCS1)	TCS1 encodes a coiled-coil domain protein that binds to microtubules and co-localizes with the cortical microtubules. Mutants have defects in trichome branching and hypocotyl elongation. TCS1 interacts with ZWI and appears to be involved in microtubule assembly.
1169	AT1G19850	MONOPTEROS (MP)	Encodes a transcription factor (IAA24) mediating embryo axis formation and vascular development. Similar to AUXIN RESPONSIVE FACTOR 1 (ARF1) shown to bind to auxin responsive elements (AREs), and to the maize transcriptional activator VIVIPAROUS 1( VP1). In situ hybridization shows expression in provascular tissue of embryos, the emerging shoot primordia, then is restricted to provascular tissue,…
1170	AT1G19880	PLASTICITY OF ROSETTE TO NITROGEN 1 (PROTON1)	Encodes a regulator of chromatin condensation 1 (RCC1) family protein; confers plasticity of rosette diameter in response to changes in N availability.
1171	AT1G19890	MALE-GAMETE-SPECIFIC HISTONE H3 (MGH3)	histone 3.3, male-gamete-specific expression. Direct target promoter of the male germline-specific transcription factor DUO1.
1172	AT1G19900	RUBY PARTICLES IN MUCILAGE (RUBY)	RUBY encodes a secreted galactose oxidase involved in cell wall modification.
1173	AT1G19920	(APS2)	encodes a chloroplast form of ATP sulfurylase.
1174	AT1G19930		Galactose oxidase/kelch repeat superfamily protein
1175	AT1G19940	GLYCOSYL HYDROLASE 9B5 (GH9B5)	glycosyl hydrolase 9B5
1176	AT1G19950	HVA22-LIKE PROTEIN H (ATHVA22H) (HVA22H)	HVA22-like protein H (ATHVA22H)
1177	AT1G19960		Unknown gene, expression decreased in response to Mn and increased by cytokinin.
1178	AT1G19970		ER lumen protein retaining receptor family protein
1179	AT1G20010	TUBULIN BETA-5 CHAIN (TUB5)	beta tubulin
1180	AT1G20020	FERREDOXIN-NADP(+)-OXIDOREDUCTASE 2 (FNR2)	Encodes a leaf-type ferredoxin:NADP(H) oxidoreductase. It is present in both chloroplast stroma and thylakoid membranes but is more abundant in the stroma The mRNA is cell-to-cell mobile.
1181	AT1G20030		Pathogenesis-related thaumatin superfamily protein
1182	AT1G20070		hypothetical protein
1183	AT1G20080	(SYTB)	Encodes a synaptotagmin localized on the Golgi apparatus and that regulates protein secretion via the unconventional protein transport from the cytosol to the extracellular matrix in plant cells.
1184	AT1G20090	RHO-RELATED PROTEIN FROM PLANTS 2 (ROP2)	Member of the Rho GTPase family. Functions to organize the microtubular cytoskeleton in combination with RIC1 and RIC4. These interactions affect pavement cell morphogenesis and pollen tube growth. ROP2 expression is stimulated by brassinosteroid treatment. Inhibit light-induced stomatal opening. The mRNA is cell-to-cell mobile.
1185	AT1G20100		DNA ligase-like protein
1186	AT1G20120		GDSL-motif esterase/acyltransferase/lipase. Enzyme group with broad substrate specificity that may catalyze acyltransfer or hydrolase reactions with lipid and non-lipid substrates.
1187	AT1G20130		GDSL-motif esterase/acyltransferase/lipase. Enzyme group with broad substrate specificity that may catalyze acyltransfer or hydrolase reactions with lipid and non-lipid substrates.
1188	AT1G20150		Subtilisin-like serine endopeptidase family protein
1189	AT1G20160	(ATSBT5.2)	Encodes two isoforms. One (SBT5.2(a) ) is a secreted, cell wall localized subtilisin-like serine protease that is involved in regulation of stomatal development. The second isoform (SBT5.2(b) is localized to endosomes.
1190	AT1G20180		transmembrane protein (DUF677)
1191	AT1G20190	EXPANSIN 11 (EXPA11)	member of Alpha-Expansin Gene Family. Naming convention from the Expansin Working Group (Kende et al, 2004. Plant Mol Bio)
1192	AT1G20280		homeobox-leucine zipper protein-like protein
1193	AT1G20290		SWI-SNF-related chromatin binding protein
1194	AT1G20300		Pentatricopeptide repeat (PPR) superfamily protein
1195	AT1G20310		syringolide-induced protein
1196	AT1G20330	STEROL METHYLTRANSFERASE 2 (SMT2)	Encodes a sterol-C24-methyltransferases involved in sterol biosynthesis. Mutants display altered sterol composition, serrated petals and sepals and altered cotyledon vascular patterning as well as ectopic endoreduplication. This suggests that suppression of endoreduplication is important for petal morphogenesis and that normal sterol composition is required for this suppression.
1197	AT1G20340	DNA-DAMAGE-REPAIR/TOLERATION PROTEIN 112 (DRT112)	recombination and DNA-damage resistance protein (DRT112) One of two Arabidopsis plastocyanin genes. Predominant form, expressed 10x higher than PETE1. PETE2 is thought to be post-transcriptionally regulated via copper accumulation and is involved in copper homeostasis. Mutation of this gene does not have obvious effect on photosynthesis. In plsp1-1 mutant plastids, the nonmature form of the prote…
1198	AT1G20350	TRANSLOCASE INNER MEMBRANE SUBUNIT 17-1 (TIM17-1)	mitochondrial inner membrane translocase
1199	AT1G20370		Pseudouridine synthase family protein
1200	AT1G20390		transposable_element_gene;gypsy-like retrotransposon family, has a 1.5e-251 P-value blast match to GB:AAD19359 polyprotein (gypsy_Ty3-element) (Sorghum bicolor);(source:TAIR10)
1201	AT1G20400		hypothetical protein (DUF1204)
1202	AT1G20410		Pseudouridine synthase family protein
1203	AT1G20440	COLD-REGULATED 47 (COR47)	Belongs to the dehydrin protein family, which contains highly conserved stretches of 7-17 residues that are repetitively scattered in their sequences, the K-, S-, Y- and lysine rich segments. Cold regulated gene, amino acid sequence homology with Group II LEA (late embryogenesis abundant) proteins. Also responds to osmotic stress, ABA, dehydration and inhibits e.coli growth while overexpressed. C…
1204	AT1G20450	EARLY RESPONSIVE TO DEHYDRATION 10 (ERD10)	Encodes a gene induced by low temperature and dehydration. Inhibits e.coli growth while overexpressed. Belongs to the dehydrin protein family, which contains highly conserved stretches of 7-17 residues that are repetitively scattered in their sequences, the K-, S-, Y- and lysine rich segments. LTI29 and LTI30 double overexpressors confer cold tolerance. Localized to membranes and cytoplasm.
1205	AT1G20480		AMP-dependent synthetase and ligase family protein
1206	AT1G20490		AMP-dependent synthetase and ligase family protein
1207	AT1G20500		AMP-dependent synthetase and ligase family protein
1208	AT1G20510	OPC-8:0 COA LIGASE1 (OPCL1)	OPC-8:0 CoA ligase1
1209	AT1G20520		DUF241 domain protein, putative (DUF241)
1210	AT1G20530		girdin (DUF630 and DUF632)
1211	AT1G20580	(SMD3B)	Core component of spliceosomal snRNP.
1212	AT1G20590		cyclin
1213	AT1G20620	CATALASE 3 (CAT3)	Catalase, catalyzes the breakdown of hydrogen peroxide (H2O2) into water and oxygen. The mRNA is cell-to-cell mobile.
1214	AT1G20630	CATALASE 1 (CAT1)	Catalyzes the reduction of hydrogen peroxide using heme group as cofactor. Protects cells from toxicity by H2O2.
1215	AT1G20650	ALTERED SEED GERMINATION 5 (ASG5)	Protein kinase superfamily protein
1216	AT1G20680		transport/golgi organization-like protein (DUF833)
1217	AT1G20690		SWI-SNF-related chromatin binding protein
1218	AT1G20693	HIGH MOBILITY GROUP B2 (HMGB2)	Encodes a protein belonging to the subgroup of HMGB (high mobility group B) proteins that have a distinctive DNA-binding motif, the HMG-box domain. The motif confers non-sequence specific interaction with linear DNA and structure-specific binding to distorted DNA sites. The HMGB proteins are involved in the assembly of nucleoprotein complexes. Can be phosphorylated by CK2alpha. The mRNA is cell-t…
1219	AT1G20700	WUSCHEL RELATED HOMEOBOX 14 (WOX14)	Encodes WOX14, a WUSCHEL-related homeobox gene family member with 65 amino acids in its homeodomain. Proteins in this family contain a sequence of eight residues (TLPLFPMH) downstream of the homeodomain called the WUS box. Functions in the shoot meristem organizing center to maintain the stem cells in an undifferentiated state. WOX4 and WOX14 act downstream of the PXY receptor kinase to regulate …
1220	AT1G20720		RAD3-like DNA-binding helicase protein
1221	AT1G20750		RAD3-like DNA-binding helicase protein
1222	AT1G20770		coiled-coil protein
1223	AT1G20780	SENESCENCE-ASSOCIATED E3 UBIQUITIN LIGASE 1 (SAUL1)	Encodes a protein containing a U-box and an ARM domain. Homozygous mutant seedlings have a seedling lethal phenotype with widespread cell death lesions throughout the cotyledons and roots.
1224	AT1G20800		F-box family protein
1225	AT1G20810		FKBP-like peptidyl-prolyl cis-trans isomerase family protein
1226	AT1G20823	(ATATL80)	Encodes a RING E3 ubiquitin ligase ATL80. Involved in phosphate mobilization and cold stress response in sufficient phosphate growth conditions. The mRNA is cell-to-cell mobile.
1227	AT1G20830	MULTIPLE CHLOROPLAST DIVISION SITE 1 (MCD1)	Encodes MCD1 (MULTIPLE CHLOROPLAST DIVISION SITE 1). Determines the site of chloroplast division in concert with MinD (AT5G24020).
1228	AT1G20840	TONOPLAST MONOSACCHARIDE TRANSPORTER1 (TMT1)	The protein encoded by this gene is found in the tonoplast (vacuole membrane) of Arabidopsis cells. The gene is expressed at highest levels in juvenile (sink) and adult (source) leaves, followed by flower tissues.
1229	AT1G20850	XYLEM CYSTEINE PEPTIDASE 2 (XCP2)	Cysteine peptidase. Enzyme activity detected in leaf.
1230	AT1G20860	PHOSPHATE TRANSPORTER 1;8 (PHT1;8)	Encodes Pht1;8, a member of the Pht1 family of phosphate transporters which include: Pht1;1/At5g43350, Pht1;2/At5g43370, Pht1;3/At5g43360, Pht1;4/At2g38940, Pht1;5/At2g32830, Pht1;6/At5g43340, Pht1;7/At3g54700, Pht1;8/At1g20860, Pht1;9/At1g76430 (Plant Journal 2002, 31:341).
1231	AT1G20870	INCREASED DNA METHYLATION 3 (IDM3)	Encodes an anti-silencing factor that prevents gene repression and DNA hypermethylation.
1232	AT1G20900	AT-HOOK MOTIF NUCLEAR-LOCALIZED PROTEIN 27 (AHL27)	Encodes an AT hook domain containing protein that acts redundantly with SOB3 to modulate hypocotyl growth inhibition in response to light.
1233	AT1G20920	REGULATOR OF CBF GENE EXPRESSION 1 (RCF1)	P-loop containing nucleoside triphosphate hydrolases superfamily protein
1234	AT1G20940		F-box family protein
1235	AT1G20970		calponin-like domain protein
1236	AT1G21000	(PLATZ1)	PLATZ transcription factor family protein
1237	AT1G21010		PADRE proteinup-regulated after infection by S. sclerotiorun.
1238	AT1G21020		transposable_element_gene;similar to Ulp1 protease family protein [Arabidopsis thaliana] (TAIR:AT1G08740.1);(source:TAIR10)
1239	AT1G21050		MIZU-KUSSEI-like protein (Protein of unknown function, DUF617)
1240	AT1G21060		Serine/Threonine-kinase, putative (Protein of unknown function, DUF547)
1241	AT1G21070	UDP-RHA/UDP-GAL TRANSPORTER 2 (URGT2)	Nucleotide-sugar transporter family protein
1242	AT1G21090		Cupredoxin superfamily protein
1243	AT1G21100	INDOLE GLUCOSINOLATE O-METHYLTRANSFERASE 1 (IGMT1)	O-methyltransferase family protein
1244	AT1G21110	INDOLE GLUCOSINOLATE O-METHYLTRANSFERASE 3 (IGMT3)	O-methyltransferase family protein
1245	AT1G21120	INDOLE GLUCOSINOLATE O-METHYLTRANSFERASE 2 (IGMT2)	O-methyltransferase family protein
1246	AT1G21130	INDOLE GLUCOSINOLATE O-METHYLTRANSFERASE 4 (IGMT4)	O-methyltransferase family protein
1247	AT1G21140	VACUOLAR IRON TRANSPORTER-LIKE 1 (VTL1)	The gene encodes nodulin-like1 whose transcript abundance was repressed under conditions of Fe-deficient growth.
1248	AT1G21160		eukaryotic translation initiation factor 2 (eIF-2) family protein
1249	AT1G21200		sequence-specific DNA binding transcription factor
1250	AT1G21210	WALL ASSOCIATED KINASE 4 (WAK4)	cell wall-associated ser/thr kinase involved in cell elongation and lateral root development
1251	AT1G21220		transposable_element_gene;copia-like retrotransposon family, has a 3.9e-26 P-value blast match to GB:CAA72989 open reading frame 1 (Ty1_Copia-element) (Brassica oleracea);(source:TAIR10)
1252	AT1G21230	WALL ASSOCIATED KINASE 5 (WAK5)	encodes a wall-associated kinase The mRNA is cell-to-cell mobile.
1253	AT1G21240	WALL ASSOCIATED KINASE 3 (WAK3)	encodes a wall-associated kinase The mRNA is cell-to-cell mobile.
1254	AT1G21250	CELL WALL-ASSOCIATED KINASE 1 (WAK1)	Encodes a cell wall-associated kinase that interacts with AtGRP3 and may function as a signaling receptor of extracellular matrix component such as oligogalacturonides. The mRNA is cell-to-cell mobile.
1255	AT1G21290		transposable_element_gene;copia-like retrotransposon family, has a 3.7e-25 P-value blast match to GB:CAA72989 open reading frame 1 (Ty1_Copia-element) (Brassica oleracea);(source:TAIR10)
1256	AT1G21300		transposable_element_gene;copia-like retrotransposon family, has a 3.9e-15 P-value blast match to GB:CAA72989 open reading frame 1 (Ty1_Copia-element) (Brassica oleracea);(source:TAIR10)
1257	AT1G21310	EXTENSIN 3 (EXT3)	Encodes extensin 3.
1258	AT1G21320	(NSRB)	nucleic acid/nucleotide binding protein
1259	AT1G21340		Dof-type zinc finger DNA-binding family protein
1260	AT1G21360	GLYCOLIPID TRANSFER PROTEIN 2 (GLTP2)	glycolipid transfer protein 2
1261	AT1G21390	EMBRYO DEFECTIVE 2170 (emb2170)	embryo defective 2170
1262	AT1G21400	(E1A1)	Branched chain alpha-keto acid dehydrogenase E1 alpha.
1263	AT1G21430	(YUC11)	Flavin-binding monooxygenase family protein
1264	AT1G21440		Phosphoenolpyruvate carboxylase family protein
1265	AT1G21460	(SWEET1)	Nodulin MtN3 family protein
1266	AT1G21500		hypothetical protein
1267	AT1G21510		TPRXL
1268	AT1G21520		hypothetical protein
1269	AT1G21530		AMP-dependent synthetase and ligase family protein
1270	AT1G21540	(AAE9)	Isobutyl-CoA synthetase involved in iso-branched wax biosynthesis.
1271	AT1G21550		Calcium-binding EF-hand family protein
1272	AT1G21560		hypothetical protein
1273	AT1G21590		kinase with adenine nucleotide alpha hydrolases-like domain-containing protein
1274	AT1G21600	PLASTID TRANSCRIPTIONALLY ACTIVE 6 (PTAC6)	Present in transcriptionally active plastid chromosomes. Involved in plastid gene expression. essential subunit of the plastid-encoded RNA polymerase (PEP). Mediates phytochrome signaling.
1275	AT1G21640	NAD KINASE 2 (NADK2)	Encodes a protein with NAD kinase activity. The protein was also shown to bind calmodulin.
1276	AT1G21650	(SECA2)	Encodes a component of the thylakoid-localized Sec system involved in the translocation of cytoplasmic proteins into plastid. Loss-of-function mutations result in arrest at the globular stage and embryo lethality.
1277	AT1G21670		DPP6 amino-terminal domain protein
1278	AT1G21680		DPP6 N-terminal domain-like protein
1279	AT1G21710	8-OXOGUANINE-DNA GLYCOSYLASE 1 (OGG1)	Encodes 8-oxoguanine-DNA glycosylase. DNA repair enzyme.
1280	AT1G21740		DUF630 family protein, putative (DUF630 and DUF632)
1281	AT1G21750	PDI-LIKE 1-1 (PDIL1-1)	Encodes a protein disulfide isomerase-like (PDIL) protein, a member of a multigene family within the thioredoxin (TRX) superfamily; isoform contains non-consensus GA donor splice site at intron 9. Transcript levels for this gene are up-regulated in response to three different chemical inducers of ER stress (dithiothreitol, beta-mercaptoethanol, and tunicamycin). Neither AtIRE1-2 nor AtbZIP60 appe…
1282	AT1G21760	F-BOX PROTEIN 7 (FBP7)	This gene is predicted to encode an F-box protein that is evolutionarily conserved between Arabidopsis and other eukaryotes including S.cerevisiae and humans. It may play a role in regulating translation under conditions of temperature stress. FBP7 transcript levels are increased at high and low temperatures. The mRNA is cell-to-cell mobile.
1283	AT1G21790		TRAM, LAG1 and CLN8 (TLC) lipid-sensing domain containing protein
1284	AT1G21810	VESICLE TETHERING 2 (VETH2)	Encodes a protein that localizes at motile vesicle-like small compartments in differentiating xylem cells that is associated with microtubule plus-ends. VETH-positive compartments are unlikely to be elements in conventional endomembrane trafficking pathways. It can associate with COG2, and together these two proteins co-localize with the EXO70A1 exocyst subunit, tethering EXO70A1 to compartments …
1285	AT1G21820
1286	AT1G21830		hypothetical protein
1287	AT1G21850	SKU5 SIMILAR 8 (sks8)	SKU5 similar 8
1288	AT1G21860	SKU5 SIMILAR 7 (sks7)	SKU5 similar 7
1289	AT1G21870	GOLGI NUCLEOTIDE SUGAR TRANSPORTER 5 (GONST5)	Encodes a Golgi-localized nucleotide-sugar transporter.
1290	AT1G21890	USUALLY MULTIPLE ACIDS MOVE IN AND OUT TRANSPORTERS 19 (UMAMIT19)	nodulin MtN21-like transporter family protein
1291	AT1G21910	DEHYDRATION RESPONSE ELEMENT-BINDING PROTEIN 26 (DREB26)	encodes a member of the DREB subfamily A-5 of ERF/AP2 transcription factor family. The protein contains one AP2 domain. There are 15 members in this subfamily including RAP2.1, RAP2.9 and RAP2.10.
1292	AT1G21920	MORN-MOTIF REPEAT PROTEIN REGULATING FLOWERING 1 ( (MRF1)	MRF1 is related to SET7/9 proteins but contains an atypical SET domain. It is expressed in phloem and mutants have a weak late flowering phenotype. Phosphatidylinositol 4-phosphate 5-kinase (PIP5K) enzyme family member.
1293	AT1G21950		transmembrane protein
1294	AT1G21970	LEAFY COTYLEDON 1 (LEC1)	Transcriptional activator of genes required for both embryo maturation and cellular differentiation. Sequence is similar to HAP3 subunit of the CCAAT-box binding factor. HAP3 subunit is divided into three domains: an amino-terminal A domain, a central B domain, and a carboxyl-terminal C domain. LEC1 shared high similarity with other HAP3 homologs only in central, B domain. LEC1 is required for th…
1295	AT1G21980	PHOSPHATIDYLINOSITOL-4-PHOSPHATE 5-KINASE 1 (PIP5K1)	Type I phosphatidylinositol-4-phosphate 5-kinase. Preferentially phosphorylates PtdIns4P. Induced by water stress and abscisic acid in Arabidopsis thaliana. Expressed in procambial cells of leaves, flowers and roots. A N-terminal Membrane Occupation and Recognition Nexus (MORN)affects enzyme activity and distribution.
1296	AT1G22010		hypothetical protein
1297	AT1G22015	(DD46)	Glycosyltransferase-31 (GT31) family member; &#946;-(1,3)-galactosyltransferase (GalT) that catalyzes the synthesis of a &#946;-(1,3)-galactan. GT31 &#946;-(1,3)-GalTs play a role in elaborating type II AGs that decorate AGPs and pectins, thereby imparting functional consequences on plant growth and development.
1298	AT1G22030		Phosphatidylinositol 4-phosphate 5-kinase (PIP5K) enzyme family member.
1299	AT1G22040		Galactose oxidase/kelch repeat superfamily protein
1300	AT1G22060		sporulation-specific protein
1301	AT1G22070	TGA1A-RELATED GENE 3 (TGA3)	Encodes a transcription factor. Like other TGAla-related factors, TGA3 has a highly conserved bZIP region and exhibits similar DNA-binding properties.
1302	AT1G22080		Cysteine proteinases superfamily protein
1303	AT1G22090	EMBRYO DEFECTIVE 2204 (emb2204)	hypothetical protein
1304	AT1G22110		structural constituent of ribosome
1305	AT1G22130	AGAMOUS-LIKE 104 (AGL104)	Encodes a member of the MIKC (MADS box, Keratin binding domain, and C terminal domain containing )family of transcriptional regulators. AGL104 is expressed in pollen.It forms heterodimers with other MICK family members (AGL65 and AGL30). Involved in late stages of pollen development and pollen tube growth.
1306	AT1G22140		zinc finger CCCH domain protein
1307	AT1G22150	SULFATE TRANSPORTER 1;3 (SULTR1;3)	sulfate transporter Sultr1;3
1308	AT1G22160		senescence-associated family protein (DUF581)
1309	AT1G22170		Phosphoglycerate mutase family protein
1310	AT1G22180		Sec14p-like phosphatidylinositol transfer family protein
1311	AT1G22210	TREHALOSE-6-PHOSPHATE PHOSPHATASE C (TPPC)	Haloacid dehalogenase-like hydrolase (HAD) superfamily protein
1312	AT1G22240	PUMILIO 8 (PUM8)	Encodes a member of the Arabidopsis Pumilio (APUM) proteins containing PUF domain (eight repeats of approximately 36 amino acids each). PUF proteins regulate both mRNA stability and translation through sequence-specific binding to the 3' UTR of target mRNA transcripts.
1313	AT1G22275	(ZYP1b)	One of two nearly identical proteins (ZYP1a) identified by similarity to transverse filament (TF) proteins. These proteins are involved in chromosome synapsis during meiosis I and localize to the synaptonemal complex (SC). Single mutants have reduced fertility and double mutants (induced by RNAi) have severely reduced fertility.
1314	AT1G22280	PHYTOCHROME-ASSOCIATED PROTEIN PHOSPHATASE TYPE 2C (PAPP2C)	Encodes a phytochrome-associated protein, PAPP2C (phytochrome-associated protein phosphatase type 2C). PAPP2C interacts in the nucleus with phyA (phytochrome A) and phyB. Functions as a regulator of phytochrome-interacting factor PIF3 by dephosphorylating phytochromes in the nucleus.
1315	AT1G22290		14-3-3 family protein
1316	AT1G22330		RNA-binding (RRM/RBD/RNP motifs) family protein
1317	AT1G22335
1318	AT1G22340	UDP-GLUCOSYL TRANSFERASE 85A7 (UGT85A7)	UDP-glucosyl transferase 85A7
1319	AT1G22360	UDP-GLUCOSYL TRANSFERASE 85A2 (UGT85A2)	UDP-glucosyl transferase 85A2
1320	AT1G22370	UDP-GLUCOSYL TRANSFERASE 85A5 (UGT85A5)	UDP-glucosyl transferase 85A5
1321	AT1G22380	UDP-GLUCOSYL TRANSFERASE 85A3 (UGT85A3)	Encodes a putative UDP-glucosyl transferase. At1g22380 was initially identified as encoding the protein AAF87154, which has been classified as a bHLH protein (AtbHLH152). Subsequently it has been found that the AAF87154 protein appears to be encoded by the AT1G23970 genomic locus.
1322	AT1G22400	(UGT85A1)	UDP-Glycosyltransferase superfamily protein
1323	AT1G22420		hydroxyproline-rich glycoprotein family protein
1324	AT1G22430		GroES-like zinc-binding dehydrogenase family protein
1325	AT1G22440		Zinc-binding alcohol dehydrogenase family protein
1326	AT1G22460		O-fucosyltransferase family protein
1327	AT1G22480		Cupredoxin superfamily protein
1328	AT1G22490	(BHLH094)	basic helix-loop-helix (bHLH) DNA-binding superfamily protein
1329	AT1G22500	ARABIDOPSIS TOXICOS EN LEVADURA 15 (ATL15)	Gene encodes a putative C3HC4-type RING zinc finger factor. it is induced in response to light and ascorbate stimulus.
1330	AT1G22530	PATELLIN 2 (PATL2)	PATLs belong to a family of proteins having a Golgi dynamics (GOLD) domain in tandem with the Sec14p-like domain. PATLs are auxin regulated. Quadruple mutants (patl2456) show altered PIN1 lateralization in root endodermis cells.
1331	AT1G22550	(NPF5.16)	Tonoplast localized pH dependent, low affinity nitrogen transporter.In shoots, expressed in leaf veins and mesophyll. In roots, GUS activity was detected in root vascular stele. More highly expressed in roots.
1332	AT1G22570		Major facilitator superfamily protein
1333	AT1G22590	AGAMOUS-LIKE 87 (AGL87)	AGAMOUS-like 87
1334	AT1G22600		Late embryogenesis abundant protein (LEA) family protein
1335	AT1G22630		SSUH2-like protein
1336	AT1G22640	MYB DOMAIN PROTEIN 3 (MYB3)	MYB-type transcription factor (MYB3) that represses phenylpropanoid biosynthesis gene expression
1337	AT1G22650	ALKALINE/NEUTRAL INVERTASE D (A/N-InvD)	Plant neutral invertase family protein
1338	AT1G22690	(GASA9)	Gibberellin-regulated family protein
1339	AT1G22700	(PYG7)	Encodes a TPR protein with homology to Ycf37 from Synechocystis that is localized to the thylakoid membrane and is involved in photosystem I biogenesis.
1340	AT1G22710	SUCROSE-PROTON SYMPORTER 2 (SUC2)	Encodes for a high-affinity transporter essential for phloem loading and long-distance transport. A major sucrose transporter, AtSUC2 can also transport a wide range of physiological and synthetic glucose conjugates with both &#945;- or &#946;-linkage.
1341	AT1G22720		Protein kinase superfamily protein
1342	AT1G22740	RAB GTPASE HOMOLOG G3B (RABG3B)	GTP-binding protein Rab7
1343	AT1G22760	POLY(A) BINDING PROTEIN 3 (PAB3)	Putative poly(A) binding protein May there fore function in posttranscriptional regulation, including mRNA turnover and translational initiation. Expression detected only in floral organs.
1344	AT1G22770	GIGANTEA (GI)	Together with CONSTANTS (CO) and FLOWERING LOCUS T (FT), GIGANTEA promotes flowering under long days in a circadian clock-controlled flowering pathway. GI acts earlier than CO and FT in the pathway by increasing CO and FT mRNA abundance. Located in the nucleus. Regulates several developmental processes, including photoperiod-mediated flowering, phytochrome B signaling, circadian clock, carbohydra…
1345	AT1G22810	(ATERF019)	encodes a member of the DREB subfamily A-5 of ERF/AP2 transcription factor family. The protein contains one AP2 domain. There are 16 members in this subfamily including RAP2.1, RAP2.9 and RAP2.10. Overexpression leands to delayed senescence and delayed flowering. Negatively regulates plant resistance to P. parasitica by suppressing PAMP-triggered immunity.
1346	AT1G22830		Tetratricopeptide repeat (TPR)-like superfamily protein
1347	AT1G22840	CYTOCHROME C-1 (CYTC-1)	Encodes cytochrome c. Contains two site II (TGGGCC/T) elements, which interact with a TCP-domain transcription factor, and a downstream internal telomeric repeat, and are required for expression of the Cytc-1 gene. Promoter directs preferential expression in root and shoot meristems and in anthers. Double mutants with CYTC-2 accumulate starch during the day, have delayed growth and development an…
1348	AT1G22850		SNARE associated Golgi protein family
1349	AT1G22870	(SCYL2A)	One of two paralogs in Arabidopsis.Loss of both SCYL2B and SCYL2A results in severe growth defects.
1350	AT1G22880	CELLULASE 5 (CEL5)	cellulase 5
1351	AT1G22885	(PROSCOOP13)	transmembrane protein
1352	AT1G22890	(STMP2)	Secreted peptide which functions in plant growth and pathogen defense.
1353	AT1G22900		Disease resistance-responsive (dirigent-like protein) family protein
1354	AT1G22910		RNA-binding (RRM/RBD/RNP motifs) family protein
1355	AT1G22930		T-complex protein 11
1356	AT1G22960		Pentatricopeptide repeat (PPR) superfamily protein
1357	AT1G22980		Grap2/cyclin-D-interacting protein
1358	AT1G22985	CYTOKININ RESPONSE FACTOR 7 (CRF7)	encodes a member of the ERF (ethylene response factor) subfamily B-5 of ERF/AP2 transcription factor family. The protein contains one AP2 domain. There are 7 members in this subfamily.
1359	AT1G22990	HEAVY METAL ASSOCIATED ISOPRENYLATED PLANT PROTEIN 22 (HIPP22)	Heavy metal transport/detoxification superfamily protein
1360	AT1G23000	HEAVY METAL ASSOCIATED PROTEIN 5 (ATHMP05)	Heavy metal transport/detoxification superfamily protein
1361	AT1G23010	LOW PHOSPHATE ROOT1 (LPR1)	Encodes a protein with multicopper oxidase activity. Located in ER. Function together with LPR2 (AT1G71040) and a P5-type ATPase (At5g23630/PDR2) in a common pathway that adjusts root meristem activity to Pi (inorganic phosphate) availability.
1362	AT1G23020	FERRIC REDUCTION OXIDASE 3 (FRO3)	Encodes a ferric chelate reductase whose transcription is regulated by FIT1. Expressed in the root, shoot, flower and cotyledon.
1363	AT1G23030	PLANT U-BOX PROTEIN 11 (PUB11)	Encodes a plant U-Box protein that is capable of binding and ubiquitinating a variety of targets including MYC2,LRR1,KIN and acting as an E3 ligase. Regulates a number of physiological hormonal and environment al responses via selective degradation of targets.Unlike PUB10, its closest homolog in Arabidopsis, it does not appear to play a major role in the MeJA-mediated response.
1364	AT1G23040		hydroxyproline-rich glycoprotein family protein
1365	AT1G23050		hydroxyproline-rich glycoprotein family protein
1366	AT1G23060	MICROTUBULE DESTABILIZING PROTEIN 40 (MDP40)	hypothetical protein
1367	AT1G23070		organic solute transporter ostalpha protein (DUF300)
1368	AT1G23080	PIN-FORMED 7 (PIN7)	Encodes a novel component of auxin efflux that is located apically in the basal cell and is involved during embryogenesis in setting up the apical-basal axis in the embryo. It is also involved in pattern specification during root development. In roots, it is expressed at lateral and basal membranes of provascular cells in the meristem and elongation zone, whereas in the columella cells it coincid…
1369	AT1G23090	(SULTR3;3)	Encodes AST91 mRNA for sulfate transporter.
1370	AT1G23100		GroES-like family protein
1371	AT1G23120		Polyketide cyclase/dehydrase and lipid transport superfamily protein
1372	AT1G23130		Polyketide cyclase/dehydrase and lipid transport superfamily protein
1373	AT1G23140	C2-DOMAIN ABA-RELATED8 (CAR8)	Expression is upregulated in the shoot of cax1/cax3 mutant.
1374	AT1G23160	GRETCHEN HAGEN 3.7 (GH3.7)	Acyl acid amido synthetase involved in conjugation of an amino acid to a plant hormone, a reaction that regulates free hormone concentration and downstream responses. Can also conjugate chorismate, a precursor of aromatic amino acids and salicylic acid, to cysteine and glutamate, respectively.
1375	AT1G23180		ARM repeat superfamily protein
1376	AT1G23190	PHOSPHOGLUCOMUTASE 3 (PGM3)	Encodes a cytosolic phosphoglucomutase (PGM). Two Arabidopsis PGM proteins (AT1G70730/PGM2 and AT1G23190/PGM3) have high sequence similarities and redundant functions. Mature plants possessing a single cPGM allele had a major reduction in cPGM activity. Whereas pgm2 and pgm3 single mutants are undistinguishable from the wild type, loss of both PGM2 and PGM3 severely impairs male and female gameto…
1377	AT1G23200	HIGHLY METHYL ESTERIFIED SEEDS (HMS)	ProPME pectin methyl esterase involved in embryo development.
1378	AT1G23205		Plant invertase/pectin methylesterase inhibitor superfamily protein
1379	AT1G23210	GLYCOSYL HYDROLASE 9B6 (GH9B6)	glycosyl hydrolase 9B6
1380	AT1G23240		Caleosin-related family protein
1381	AT1G23250		Caleosin-related family protein
1382	AT1G23270		hypothetical protein
1383	AT1G23280		MAK16 protein-like protein
1384	AT1G23300		MATE efflux family protein
1385	AT1G23310	GLUTAMATE:GLYOXYLATE AMINOTRANSFERASE (GGT1)	Identified by cloning the gene that corresponded to a purified protein having glyoxylate aminotransferase activity. Localized to the peroxisome and thought to be involved in photorespiration/ metabolic salvage pathway.
1386	AT1G23320	TRYPTOPHAN AMINOTRANSFERASE RELATED 1 (TAR1)	Encodes a protein with similarity to the TAA1 trytophan aminotransferase involved in IAA biosynthesis. This gene appears to be expressed at a very low level during seedling development. Triple mutant analyses implicate this gene in embryonic development.
1387	AT1G23330		alpha/beta-Hydrolases superfamily protein
1388	AT1G23340		carboxyl-terminal proteinase, putative (DUF239)
1389	AT1G23350		Plant invertase/pectin methylesterase inhibitor superfamily protein
1390	AT1G23370
1391	AT1G23390	KELCH DOMAIN-CONTAINING F-BOX PROTEIN (KFB)	A kelch domain-containing F-box protein. Its N terminus contains a typical F-box motif but its C-terminal domain only consists of one predicted kelch motif. Predicted to be stu Interacts with chalcone synthase CHS to mediate CHS ubiquitination and degradation.
1392	AT1G23400	CHLOROPLAST RNA SPLICING2-ASSOCIATED FACTOR 2 (CAF2)	Promotes the splicing of chloroplast group II introns.
1393	AT1G23410	(RPS27AA)	cytosolic ribosomal protein gene, part of eS31 family
1394	AT1G23420	INNER NO OUTER (INO)	Essential for formation and asymmetric growth of the ovule outer integument. Member of the YABBY protein family of putative transcription factors that contain apparent Cys(2)-Cys(2) zinc-finger domains and regions of similarity to the high mobility group (HMG) transcription factors. INO may be required for polarity determination in the central part of the ovule.
1395	AT1G23430
1396	AT1G23440		Peptidase C15, pyroglutamyl peptidase I-like protein
1397	AT1G23450		pentatricopeptide (PPR) repeat-containing protein
1398	AT1G23460		Pectin lyase-like superfamily protein
1399	AT1G23480	CELLULOSE SYNTHASE-LIKE A3 (CSLA03)	encodes a gene similar to cellulose synthase
1400	AT1G23510		OBP32pep protein
1401	AT1G23520		hypothetical protein (DUF220)
1402	AT1G23530		transmembrane protein
1403	AT1G23540	PROLINE-RICH EXTENSIN-LIKE RECEPTOR KINASE 12 (PERK12)	Encodes a member of the PERK family of putative receptor kinases. Overexpression leads to morphological defects and reduced fertility and increased expression of MAX genes.
1404	AT1G23550	SIMILAR TO RCD ONE 2 (SRO2)	Encodes a protein with similarity to RCD1 but without the WWE domain. The protein does have a PARP signature upstream of the C-terminal protein interaction domain. The PARP signature may bind NAD+ and attach the ADP-ribose-moiety from NAD+ to the target molecule. Its presence suggests a role for the protein in ADP ribosylation. Its transcript level is up-regulated by tunicamycin (N-linked glycosy…
1405	AT1G23560		OBP32pep, putative (DUF220)
1406	AT1G23570		hypothetical protein (DUF220)
1407	AT1G23580		transmembrane protein, putative (Domain of unknown function DUF220)
1408	AT1G23590		OBP32pep protein, putative (Domain of unknown function DUF220)
1409	AT1G23600		OBP32pep protein, putative (Domain of unknown function DUF220)
1410	AT1G23610		hypothetical protein
1411	AT1G23630
1412	AT1G23640		OBP32pep protein
1413	AT1G23650		hypothetical protein
1414	AT1G23670		OBP32pep protein, putative (DUF220)
1415	AT1G23680		hypothetical protein (DUF220)
1416	AT1G23690		hypothetical protein (Domain of unknown function DUF220)
1417	AT1G23700		Protein kinase superfamily protein
1418	AT1G23710		hypothetical protein (DUF1645)
1419	AT1G23720	EXTENSIN 15 (EXT15)	Proline-rich extensin-like family protein
1420	AT1G23730	BETA CARBONIC ANHYDRASE 3 (BCA3)	beta carbonic anhydrase 3
1421	AT1G23740	ALKENAL/ONE OXIDOREDUCTASE (AOR)	AOR is an alkenal/one oxidoreductase that acts on compounds with unsaturated alpha,beta-carbonyls. The activity of this enzyme with a number of substrates, including acrolein and 3-buten-2-one, was demonstrated in vitro using a truncated form of the protein that lacked approximately 80 of the first amino acids. This protein appears to localize to the chloroplast where it likely helps to maintain …
1422	AT1G23750		Nucleic acid-binding, OB-fold-like protein
1423	AT1G23760	(JP630)	Encodes aromatic rich glycoprotein JP630.
1424	AT1G23780		F-box family protein
1425	AT1G23790	CORTICAL MICROTUBULE DISORDERING4 (CORD4)	dicer-like protein (DUF936)
1426	AT1G23800	ALDEHYDE DEHYDROGENASE 2B7 (ALDH2B7)	Encodes a mitochondrial aldehyde dehydrogenase; nuclear gene for mitochondrial product.
1427	AT1G23810		Paired amphipathic helix (PAH2) superfamily protein
1428	AT1G23820	SPERMIDINE SYNTHASE 1 (SPDS1)	Spermidine synthase.
1429	AT1G23830		transmembrane protein
1430	AT1G23850		transmembrane protein
1431	AT1G23870	TREHALOSE-PHOSPHATASE/SYNTHASE 9 (TPS9)	Encodes an enzyme putatively involved in trehalose biosynthesis. The protein has a trehalose synthase (TPS)-like domain that may or may not be active as well as a trehalose phosphatase (TPP)-like domain. The mRNA is cell-to-cell mobile.
1432	AT1G23910		Polyketide cyclase/dehydrase and lipid transport superfamily protein
1433	AT1G23940
1434	AT1G23950		hypothetical protein (DUF626)
1435	AT1G23960		hypothetical protein (DUF626)
1436	AT1G23990		transposable_element_gene;non-LTR retrotransposon family (LINE), has a 2.0e-30 P-value blast match to GB:NP_038603 L1 repeat, Tf subfamily, member 23 (LINE-element) (Mus musculus);(source:TAIR10)
1437	AT1G24000		Polyketide cyclase/dehydrase and lipid transport superfamily protein
1438	AT1G24010		Polyketide cyclase/dehydrase and lipid transport superfamily protein
1439	AT1G24020	MLP-LIKE PROTEIN 423 (MLP423)	MLP-like protein 423
1440	AT1G24030	PBS1-LIKE 28 (PBL28)	Protein kinase superfamily protein
1441	AT1G24060		hypothetical protein
1442	AT1G24090	(RNH1C)	RNase H family protein
1443	AT1G24100	UDP-GLUCOSYL TRANSFERASE 74B1 (UGT74B1)	Encodes a UDP-glucose:thiohydroximate S-glucosyltransferase, involved in glucosinolate biosynthesis
1444	AT1G24110		Peroxidase superfamily protein
1445	AT1G24140	(AT3-MMP)	Expression induced by fungal and bacterial pathogens.
1446	AT1G24180	IAA-CONJUGATE-RESISTANT 4 (IAR4)	Arabidopsis thaliana pyruvate dehydrogenase E1a-like subunit. 81% identical to a previously characterized Arabidopsis mitochondrial PDH E1a-subunit, At1g59900. Serine 296 phosphorylation of IAR4 has critical function in root hair formation and root development. Changing Ser296 in IAR4 to Ala resulted in a phenotype intermediate between mutant and wild-type, while substitution to Asp was either le…
1447	AT1G24210		Paired amphipathic helix (PAH2) superfamily protein
1448	AT1G24260	SEPALLATA3 (SEP3)	Member of the MADs box transcription factor family. SEP3 is redundant with SEP1 and 2. Flowers of SEP1/2/3 triple mutants show a conversion of petals and stamens to sepals.SEP3 forms heterotetrameric complexes with other MADS box family members and binds to the CArG box motif.
1449	AT1G24320		Six-hairpin glycosidases superfamily protein
1450	AT1G24330	(PUB6)	Plant U-box type E3 ubiquitin ligase (PUB).
1451	AT1G24340	EMBRYO DEFECTIVE 2421 (emb2421)	A locus involved in embryogenesis. Mutations in this locus result in embryo lethality. The mRNA is cell-to-cell mobile.
1452	AT1G24360	(KR)	Dual mitochondrial and plastid localized b-ketoacyl- ACP reductase, a component of the fatty acid synthase complex.
1453	AT1G24390		hypothetical protein
1454	AT1G24400	LYSINE HISTIDINE TRANSPORTER 2 (LHT2)	High-affinity transporter for neutral and acidic amino acids, expressed in tapetum tissue of anthers. Transport of 1-Aminocyclopropane-1-carboxylic acid (ACC).
1455	AT1G24420		HXXXD-type acyl-transferase family protein
1456	AT1G24430		HXXXD-type acyl-transferase family protein
1457	AT1G24440		RING/U-box superfamily protein
1458	AT1G24460	TGN-LOCALIZED SYP41 INTERACTING PROTEIN (TNO1)	Encodes a novel protein that co-immunoprecipitates with SYP41. It is involved in vacuolar trafficking and salt tolerance, potentially via a role in vesicle fusion and in maintaining TGN structure or identity. Mutants display delayed formation of the Brefeldin A (BFA) compartment in cotyledons upon application of BFA.
1459	AT1G24470	BETA-KETOACYL REDUCTASE 2 (KCR2)	Encodes one of the two Arabidopsis homologues to YBR159w encoding a S. cerevisiae beta-ketoacyl reductase (KCR), which catalyzes the first reduction during VLCFA (very long chain fatty acids, >18 carbon) elongation: KCR1 (At1g67730), KCR2 (At1g24470). Complementation of the yeast ybr159Delta mutant demonstrated that the two KCR proteins are divergent and that only AtKCR1 can restore heterologous …
1460	AT1G24490	ALBINA 4 (ALB4)	Homologue of the Alb3/Oxa1/YidC family. ALB4 is almost identical to the Alb3/Oxa1/YidC domain of the previously described 110 kDa inner envelope protein ARTEMIS. However, ALB4 is expressed as a separate 55 kDa protein and is located in the thylakoid membrane of chloroplasts. Analysis of a T-DNA insertion line with a reduced level of Alb4 revealed chloroplasts with an altered ultrastructure. Mutan…
1461	AT1G24520	HOMOLOG OF BRASSICA CAMPESTRIS POLLEN PROTEIN 1 (BCP1)	Male fertility gene acting on tapetum and microspore
1462	AT1G24530		Transducin/WD40 repeat-like superfamily protein
1463	AT1G24540	CYTOCHROME P450, FAMILY 86, SUBFAMILY C, POLYPEPTIDE 1 (CYP86C1)	member of CYP86C
1464	AT1G24560	PLANT-UNIQUE RAB5 EFFECTOR 2 (PUF2)	Effector molecule of the plant-unique RAB5, ARA6. Acts in the vacuolar/endocytic trafficking pathway with canonical RAB5 and SYP. Promotes recruitment of VSP9a onto the endosome, which is required for efficient RAB5 activation. Colocalizes with RAB5 on endosomes, where it coordinates transport with canonical RAB5.
1465	AT1G24575		DEAD-box ATP-dependent RNA helicase-like protein
1466	AT1G24600		hypothetical protein
1467	AT1G24620	CALMODULIN LIKE 25 (CML25)	Encodes a EF-hand calcium-binding protein family member. Mutants exhibit longer root hairs under phosphate-deficient conditions.
1468	AT1G24625	ZINC FINGER PROTEIN 7 (ZFP7)	Encodes a zinc finger protein containing only a single zinc finger.
1469	AT1G24640		transposable_element_gene;non-LTR retrotransposon family (LINE), has a 4.3e-37 P-value blast match to GB:NP_038602 L1 repeat, Tf subfamily, member 18 (LINE-element) (Mus musculus);(source:TAIR10)
1470	AT1G24650		Leucine-rich repeat protein kinase family protein
1471	AT1G24678
1472	AT1G24735		S-adenosyl-L-methionine-dependent methyltransferases superfamily protein
1473	AT1G24764	MICROTUBULE-ASSOCIATED PROTEINS 70-2 (MAP70-2)	Member of the MAP70 protein family.
1474	AT1G24938		transposable_element_gene;similar to unknown protein [Arabidopsis thaliana] (TAIR:AT1G35100.1);(source:TAIR10)
1475	AT1G24996		hypothetical protein
1476	AT1G25025		hypothetical protein
1477	AT1G25230		Calcineurin-like metallo-phosphoesterase superfamily protein
1478	AT1G25240	(PICALM9A)	ENTH/VHS/GAT family protein
1479	AT1G25250	INDETERMINATE(ID)-DOMAIN 16 (IDD16)	Encodes a transcription factor that, together with IDD14 and IDD15, regulates auxin biosynthesis and transport and thus aerial organ morphogenesis and gravitropic responses . IDD16 also binds to the SPCH promoter and regulates stomata initiation.
1480	AT1G25260	REDUCED POLLEN NUMBER (RDP)	Involved in male gamete development. Trans-acting factor in the assembly of the pre-60S particle.
1481	AT1G25270	USUALLY MULTIPLE ACIDS MOVE IN AND OUT TRANSPORTERS 24 (UMAMIT24)	nodulin MtN21-like transporter family protein
1482	AT1G25275		Thionin-like gene involved in resistance against the beet cyst nematode (Heterodera schachtii).
1483	AT1G25330	CESTA (CES)	Encodes CESTA, a positive regulator of brassinosteroid biosynthesis.
1484	AT1G25340	MYB DOMAIN PROTEIN 116 (MYB116)	putative transcription factor (MYB116)
1485	AT1G25350	OVULE ABORTION 9 (OVA9)	glutamine-tRNA ligase, putative / glutaminyl-tRNA synthetase, putative / GlnRS
1486	AT1G25360	D ORGANELLAR TRANSCRIPT PROCESSING 90 (OTP90)	DYW-type pentatricopeptide repeat protein involved in C to U editing in mitochondria and chloroplasts.
1487	AT1G25390	LEAF RUST 10 DISEASE-RESISTANCE LOCUS RECEPTOR- LIKE PROTEIN KINASE-LIKE 4 (LRK10L4)	Protein kinase superfamily protein
1488	AT1G25400		transmembrane protein
1489	AT1G25410	ISOPENTENYLTRANSFERASE 6 (IPT6)	AB061404 Arabidopsis thaliana AtIPT6 mRNA for cytokinin synthase, complete cds
1490	AT1G25450	3-KETOACYL-COA SYNTHASE 5 (KCS5)	Encodes KCS5, a member of the 3-ketoacyl-CoA synthase family involved in the biosynthesis of VLCFA (very long chain fatty acids).
1491	AT1G25460		NAD(P)-binding Rossmann-fold superfamily protein
1492	AT1G25490	ROOTS CURL IN NPA (RCN1)	One of three genes encoding phosphoprotein phosphatase 2A regulatory subunit A; Recessive ethylene-response mutant EER1 displays increased ethylene sensitivity in the hypocotyl and stem
1493	AT1G25500		Plasma-membrane choline transporter family protein
1494	AT1G25510		Eukaryotic aspartyl protease family protein
1495	AT1G25530		Transmembrane amino acid transporter family protein
1496	AT1G25550	HRS1 HOMOLOG3 (HHO3)	Member of HHO/HRS GARP type transcriptional repressor family. Involved in Pi uptake and Pi starvation signaling. Transcriptional repressors that functions with other NIGT genes as an important hub in the nutrient signaling network associated with the acquisition and use of nitrogen and phosphorus.
1497	AT1G25560	TEMPRANILLO 1 (TEM1)	Encodes a member of the RAV transcription factor family that contains AP2 and B3 binding domains. Involved in the regulation of flowering under long days. Loss of function results in early flowering. Overexpression causes late flowering and repression of expression of FT. Novel transcriptional regulator involved in ethylene signaling. Promoter bound by EIN3. EDF1 in turn, binds to promoter elemen…
1498	AT1G25570	(LLR1)	Di-glucose binding protein with Leucine-rich repeat domain-containing protein
1499	AT1G25580	SUPPRESSOR OF GAMMA RADIATION 1 (SOG1)	Encodes suppressor of gamma response 1 (SOG1), a putative transcription factor governing multiple responses to DNA damage.
1500	AT1G26150	PROLINE-RICH EXTENSIN-LIKE RECEPTOR KINASE 10 (PERK10)	Encodes a member of the proline-rich extensin-like receptor kinase (PERK) family. This family consists of 15 predicted receptor kinases (PMID: 15653807).
1501	AT1G26180		membrane protein
1502	AT1G26190	TRIPHOSPHATE TUNNEL METALLOENZYME 2 (TTM2)	TTM2 is a triphosphate tunnel metalloenzyme that displays pyrophosphatase activity.It contains both a uridine kinase (UK) domain and CYTH domain. TTM2 is involved in negative regulation defense response to pathogens (PMID:28733390).
1503	AT1G26210	SOB FIVE-LIKE 1 (SOFL1)	AtSOFL1 acts redundantly with AtSOFL2 as positive regulator of cytokinin levels.
1504	AT1G26220	SEROTONIN N-ACETYLTRANSFERASE 2 (SNAT2)	Catalyzes formation of N-acetylserotonin (NAS) from serotonin. Involved in the GA-related flowering pathway.
1505	AT1G26230	CHAPERONIN-60BETA4 (CPN60BETA4)	Encodes a subunit of chloroplasts chaperonins that are involved in mediating the folding of newly synthesized, translocated, or stress-denatured proteins. Cpn60 subunits are: Cpn60alpha1 (At2g28000), AtCpn60alpha2 (At5g18820), AtCpn60beta1 (At1g55490), AtCpn60beta2 (At3g13470), AtCpn60beta3 (At5g56500), AtCpn60beta4 (At1g26230).
1506	AT1G26240	EXTENSIN 19 (EXT19)	Proline-rich extensin-like family protein
1507	AT1G26250	EXTENSIN 18 (EXT18)	Proline-rich extensin-like family protein
1508	AT1G26260	CRYPTOCHROME-INTERACTING BASIC-HELIX-LOOP-HELIX 5 (CIB5)	Encodes CIB5 (cryptochrome-interacting basic-helix-loop-helix). Related to CIB1 (AT4G34530). CIB5 interacts with CRY2 and forms heterodimer with CIB1 in vitro. Regulates flowering time redundantly with CIB1.
1509	AT1G26270		Phosphatidylinositol 3- and 4-kinase family protein
1510	AT1G26290		hypothetical protein
1511	AT1G26310	CAULIFLOWER (CAL)	Floral homeotic gene encoding a MADS domain protein homologous to AP1. Enhances the flower to shoot transformation in ap1 mutants.
1512	AT1G26320		Zinc-binding dehydrogenase family protein
1513	AT1G26340	CYTOCHROME B5 ISOFORM A (CB5-A)	encodes a member of the cytochromes b5 family of proteins that localizes to the outer envelope of the chloroplast. The C-terminal portion of the protein appears to be capable of inserting into a plant microsomal membrane in vitro.
1514	AT1G26350		hypothetical protein
1515	AT1G26360	METHYL ESTERASE 13 (MES13)	Encodes a protein predicted to act as a carboxylesterase. It has similarity to the SABP2 methyl salicylate esterase from tobacco but no enzymatic activity has been identified for this protein.
1516	AT1G26380	FAD-LINKED OXIDOREDUCTASE 1 (FOX1)	Functions in the biosynthesis of 4-hydroxy indole-3-carbonyl nitrile (4-OH-ICN), a cyanogenic phytoalexin in Arabidopsis. FOX1 acts as a dehydrogenase on indole cyanohydrin to form indole carbonyl nitrile.
1517	AT1G26390	(ATBBE4)	FAD-binding Berberine family protein
1518	AT1G26400	(ATBBE5)	FAD-binding Berberine family protein
1519	AT1G26410	(ATBBE6)	FAD-binding Berberine family protein
1520	AT1G26420	(ATBBE7)	FAD-binding Berberine family protein
1521	AT1G26440	UREIDE PERMEASE 5 (UPS5)	Encodes a ureide permease, uptake assays in yeast mutants indicated the longer splice variant is a cellular importer for allantoin, uracil and xanthine. Encodes 2 splice variants, UPS5L and UPS5S, which under nonstress conditions may function in allantoin degradation for nutrient recycling, whereas under stress, both genes may be involved in vesicular export allowing allantoin translocation from …
1522	AT1G26450		Carbohydrate-binding X8 domain superfamily protein
1523	AT1G26460		Tetratricopeptide repeat (TPR)-like superfamily protein
1524	AT1G26470	SNRK2-SUBSTRATE 1 (SNS1)	chromatin modification-like protein
1525	AT1G26480	GENERAL REGULATORY FACTOR 12 (GRF12)	14-3-3 protein GF14iota (grf12)
1526	AT1G26500		Pentatricopeptide repeat (PPR) superfamily protein
1527	AT1G26530		PIN domain-like family protein
1528	AT1G26540		Agenet domain-containing protein
1529	AT1G26560	BETA GLUCOSIDASE 40 (BGLU40)	beta glucosidase 40
1530	AT1G26570	UDP-GLUCOSE DEHYDROGENASE 1 (UGD1)	UDP-glucose dehydrogenase 1
1531	AT1G26590		C2H2-like zinc finger protein
1532	AT1G26600	CLAVATA3/ESR-RELATED 9 (CLE9)	Member of a large family of putative ligands homologous to the Clavata3 gene. Consists of a single exon. Can partially replace CLV3 function in vivo.
1533	AT1G26610		C2H2-like zinc finger protein
1534	AT1G26620		T-box transcription factor, putative (DUF863)
1535	AT1G26640	ISOPENTENYL PHOSPHATE KINASE (IPK)	Encodes a cytosolic isopentenyl phosphate kinase that plays an important role in regulating the formation of both MVA (mevalonic acid) and MEP (methylerythritol phosphate) pathway-derived terpenoid compounds by controlling the ratio of IP/DMAP to IPP/DMAPP. IPP and DMAPP are the universal C5 building blocks of all natural terpenoids. IPK enhances terpenoid formation by returning IP/DMAP to the te…
1536	AT1G26660		Prefoldin chaperone subunit family protein
1537	AT1G26665	MEDIATOR 10B (MED10B)	Mediator complex, subunit Med10
1538	AT1G26680		transcriptional factor B3 family protein
1539	AT1G26700	MILDEW RESISTANCE LOCUS O 14 (MLO14)	A member of a large family of seven-transmembrane domain proteins specific to plants, homologs of the barley mildew resistance locus o (MLO) protein. The Arabidopsis genome contains 15 genes encoding MLO proteins, with localization in plasma membrane. Phylogenetic analysis revealed four clades of closely-related AtMLO genes. ATMLO14 belongs to the clade I, with AtMLO4 and AtMLO11. The gene is exp…
1540	AT1G26710		transmembrane protein
1541	AT1G26730		EXS (ERD1/XPR1/SYG1) family protein
1542	AT1G26740		Ribosomal L32p protein family
1543	AT1G26760	SET DOMAIN PROTEIN 35 (SDG35)	SET domain protein 35
1544	AT1G26770	EXPANSIN A10 (EXPA10)	Encodes an expansin. Naming convention from the Expansin Working Group (Kende et al, Plant Mol Bio). Involved in the formation of nematode-induced syncytia in roots of Arabidopsis thaliana.
1545	AT1G26780	MYB DOMAIN PROTEIN 117 (MYB117)	Encodes LOF1 (LATERAL ORGAN FUSION1), a MYB-domain transcription factor expressed in organ boundaries. Functions in boundary specification, meristem initiation and maintenance, and organ patterning. Also see LOF2 (At1g69560).
1546	AT1G26790	CYCLING DOF FACTOR 6 (CDF6)	Dof-type zinc finger DNA-binding family protein
1547	AT1G26795		Plant self-incompatibility protein S1 family
1548	AT1G26800	MISFOLDED PROTEIN SENSING RING E3 LIGASE 1 (MPSR1)	MPSR1 is cytoplasmic E3 ligase that senses misfolded proteins independently of chaperones and targets those proteins for degradation via the 26S proteasome. Involved in the regulation of the homeostasis of sensor NLR immune receptors.
1549	AT1G26820	RIBONUCLEASE 3 (RNS3)	Encodes ribonuclease RNS3.
1550	AT1G26840	ORIGIN RECOGNITION COMPLEX PROTEIN 6 (ORC6)	Origin Recognition Complex subunit 6. Involved in the initiation of DNA replication. Regulated transcriptionally during cell cycle, peaking at G1/S-phase. Target of E2F/DF family of transcription factors. It acts downstream of BRP4, and is, at least in part, involved in the BRP4-mediated mitotic cell-cycle progression.
1551	AT1G26850		S-adenosyl-L-methionine-dependent methyltransferases superfamily protein
1552	AT1G26860		transposable_element_gene;similar to unknown protein [Arabidopsis thaliana] (TAIR:AT2G01700.1);(source:TAIR10)
1553	AT1G26870	FEZ (FEZ)	NAC-domain protein. Expressed in root cap stem cells, where it promotes periclinal root cap-forming divisions. Involved in a regulatory feedback loop with SMB. FEZ activates SMB in hte root cap daughter cells soon after division, and SMB in turn represses FEZ expression in these cells, thereby preventing further stem cell divisions.
1554	AT1G26920		zinc finger CCHC domain protein
1555	AT1G26930		Galactose oxidase/kelch repeat superfamily protein
1556	AT1G26960	HOMEOBOX PROTEIN 23 (AtHB23)	Encodes a homeodomain leucine zipper class I (HD-Zip I) protein. Participates in the gene regulatory network controlling root branching by mediating the regulation of LAX3 by ARF7/19.
1557	AT1G26970	PBS1-LIKE 4 (PBL4)	Protein kinase superfamily protein
1558	AT1G26990		transposable_element_gene;copia-like retrotransposon family, has a 2.0e-294 P-value blast match to GB:CAA72989 open reading frame 1 (Ty1_Copia-element) (Brassica oleracea);(source:TAIR10)
1559	AT1G27000		GRIP/coiled-coil protein, putative (DUF1664)
1560	AT1G27030		hypothetical protein
1561	AT1G27040	NRT1/ PTR FAMILY 4.5 (NPF4.5)	Major facilitator superfamily protein
1562	AT1G27050		Encodes a protein with a RNA recognition motif. Previously annotated as ATHB54, a homeodomain leucine zipper (HD-Zip) family protein. In the TAIR10 genome release (2010), this locus was split into two loci: AT1G27045 (containing homeodomain and leucine zipper domains) and AT1G27050 (containing a RNA recognition motif). AT1G27045 is now named ATHB54. Note that Affymetrix ATH1 Probe Set linked to s…
1563	AT1G27060	SENSITIVE TO ABA 1 (SAB1)	Regulator of chromosome condensation (RCC1) family protein
1564	AT1G27080	NRT1/ PTR FAMILY 2.12 (NPF2.12)	Encodes a protein with low-affinity nitrate transporter activity that is expressed in the vascular tissue of the funiculus and the silique. This plasma membrane-localized enzyme is predicted to have 12 transmembrane domains. Plants lacking NRT1.6 have reduced levels of nitrate in their seeds and have increased levels of early embryonic developmental defects and seed abortion.
1565	AT1G27090		glycine-rich protein
1566	AT1G27100		Actin cross-linking protein
1567	AT1G27120	(GALT4)	Encodes a Golgi-localized hydroxyproline-O-galactosyltransferase.
1568	AT1G27130	GLUTATHIONE S-TRANSFERASE TAU 13 (GSTU13)	Encodes glutathione transferase belonging to the tau class of GSTs. Naming convention according to Wagner et al. (2002). GSTU13 acts in the pathogen triggered pathway for indole glucosinolate metabolisms that involves also PENETRATION2 myrosinase. It is likely the enzyme that conjugates GSH with unstable indol-3-ylmethyl-ITCs formed upon PEN2-mediated IG hydrolysis, particularly in the branch of …
1569	AT1G27140	GLUTATHIONE S-TRANSFERASE TAU 14 (GSTU14)	Encodes glutathione transferase belonging to the tau class of GSTs. Naming convention according to Wagner et al. (2002).
1570	AT1G27160		valyl-tRNA synthetase / valine-tRNA ligase-like protein
1571	AT1G27170		transmembrane receptors / ATP binding protein
1572	AT1G27190	BAK1-INTERACTING RECEPTOR-LIKE KINASE 3 (BIR3)	Activated by TCP8/14/15/22, involved in modulation of GA-dependent stamen filament elongation.
1573	AT1G27200		glycosyltransferase family protein (DUF23)
1574	AT1G27220		paired amphipathic helix repeat-containing protein
1575	AT1G27240		Paired amphipathic helix (PAH2) superfamily protein
1576	AT1G27285		transposable_element_gene;copia-like retrotransposon family, has a 0. P-value blast match to GB:AAC02666 polyprotein (Ty1_Copia-element) (Arabidopsis thaliana);(source:TAIR10)
1577	AT1G27290		transmembrane protein
1578	AT1G27300		transmembrane protein
1579	AT1G27320	HISTIDINE KINASE 3 (HK3)	Encodes a histidine kinases, a cytokinin receptor that controls cytokinin-mediated leaf longevity through a specific phosphorylation of the response regulator, ARR2. The mRNA is cell-to-cell mobile.
1580	AT1G27330		Ribosome associated membrane protein RAMP4
1581	AT1G27340	LEAF CURLING RESPONSIVENESS (LCR)	Encodes a putative F-box protein that is involved in the regulation of leaf morphology.
1582	AT1G27360	SQUAMOSA PROMOTER-LIKE 11 (SPL11)	In conjunction with SPL10 and SPL2, SPL11 redundantly controls proper development of lateral organs in association with shoot maturation in the reproductive phase. SPL2, SPL10, and SPL11, suppress root regeneration with age by inhibiting wound-induced auxin biosynthesis.
1583	AT1G27370	SQUAMOSA PROMOTER BINDING PROTEIN-LIKE 10 (SPL10)	In conjunction with SPL11 and SPL2, SPL10 redundantly controls proper development of lateral organs in association with shoot maturation in the reproductive phase. SPL2, SPL10, and SPL11, suppress root regeneration with age by inhibiting wound-induced auxin biosynthesis. SPL10 also controls lamina shape during vegetative development.
1584	AT1G27380	ROP-INTERACTIVE CRIB MOTIF-CONTAINING PROTEIN 2 (RIC2)	encodes a member of a novel protein family that contains contain a CRIB (for Cdc42/Rac-interactive binding) motif required for their specific interaction with GTP-bound Rop1 (plant-specific Rho GTPase). Interacts with Rop1 and is involved in pollen tube growth and function. Protein most similar to RIC4 (family subgroup V). Gene is expressed in all tissues examined.
1585	AT1G27390	TRANSLOCASE OUTER MEMBRANE 20-2 (TOM20-2)	Form of TOM20, which is a component of the TOM complex, involved in transport of nuclear-encoded mitochondrial proteins
1586	AT1G27435		hypothetical protein
1587	AT1G27460	NO POLLEN GERMINATION RELATED 1 (NPGR1)	encodes a calmodulin-binding protein that is expressed in pollen, suspension culture cells, flowers, and fruits. The mRNA is cell-to-cell mobile.
1588	AT1G27470		transducin family protein / WD-40 repeat family protein
1589	AT1G27480		alpha/beta-Hydrolases superfamily protein
1590	AT1G27520	MANNOSIDASE 5 (MNS5)	Glycosyl hydrolase family 47 protein
1591	AT1G27530		ubiquitin-fold modifier-conjugating enzyme
1592	AT1G27540	F-BOX/DUF295 BRASSICEAE-SPECIFIC 2 (ATFDB2)	F-box protein (DUF295)
1593	AT1G27550	F-BOX/DUF295 BRASSICEAE-SPECIFIC 3 (ATFDB3)	F-box family protein
1594	AT1G27570		phosphatidylinositol 3- and 4-kinase family protein
1595	AT1G27590
1596	AT1G27610		hypothetical protein
1597	AT1G27620		HXXXD-type acyl-transferase family protein
1598	AT1G27630	CYCLIN T 1;3 (CYCT1;3)	cyclin T 1
1599	AT1G27640		Putative role in leaf development. Comparison of SALK_123839C to Columbia under normal growth conditions resulted in a trend toward increased leaf length in the mutant (P=0.13; median 22 for mutant,17 for Columbia) (Ann Stapleton and Delita Pardue, 2009, personal communication).
1600	AT1G27650	(ATU2AF35A)	U2 auxiliary factor small subunit. The atU2AF35a protein and its homolog, atU2AF35b, contain most of the conserved domains of hsU2AF35, including the psiRRM, one RS domain, two zinc fingers, and the two regions for interacting with U2AF large subunit. Both proteins lack the stretch of glycines present in human U2AF35. The sequences are overall 83% identical, and each Arabidopsis homolog shows app…
1601	AT1G27670		transmembrane protein
1602	AT1G27690	BOUNDARY OF ROP DOMAIN3 (BDR3)	lipase, putative (DUF620)
1603	AT1G27700		Syntaxin/t-SNARE family protein
1604	AT1G27720	TBP-ASSOCIATED FACTOR 4B (TAF4b)	TBP-associated factor 4B
1605	AT1G27730	SALT TOLERANCE ZINC FINGER (STZ)	Related to Cys2/His2-type zinc-finger proteins found in higher plants. Compensated for a subset of calcineurin deficiency in yeast. Salt tolerance produced by ZAT10 appeared to be partially dependent on ENA1/PMR2, a P-type ATPase required for Li+ and Na+ efflux in yeast. The protein is localized to the nucleus, acts as a transcriptional repressor and is responsive to chitin oligomers. Also involv…
1606	AT1G27740	ROOT HAIR DEFECTIVE 6-LIKE 4 (RSL4)	Basic helix-loop-helix (bHLH) transcription factor that is sufficient to promote postmitotic cell growth in root-hair cells. RSL4 is a direct transcriptional target of RHD6
1607	AT1G27790		transposable_element_gene;similar to unknown protein [Arabidopsis thaliana] (TAIR:AT3G24380.1);(source:TAIR10)
1608	AT1G27820	CCR4-ASSOCIATED FACTOR 1C (CAF1C)	Deadenylase.
1609	AT1G27840	(ATCSA-1)	Encodes a DDB1a interacting protein ATCSA-1 required for UV-B tolerance and genomic integrity. Involved in dictating the efficiency and the strand preference of repair of transcribed genes, works as the dominant protein in coupling repair to transcription with minor contribution from CSA2.
1610	AT1G27850	BASIC PROLINE-RICH PROTEIN5 (BPP5)	Encodes a microtubule-associated protein involved in cortical microtubule organization during leaf development.
1611	AT1G27880		DEAD/DEAH box RNA helicase family protein
1612	AT1G27900		RNA helicase family protein
1613	AT1G27920	MICROTUBULE-ASSOCIATED PROTEIN 65-8 (MAP65-8)	microtubule-associated protein 65-8
1614	AT1G27930	(AGM1)	Arabinogalactan methylesterase,involved in arabinogalactan glucuronic acid methylation. Interacts with eIF3.
1615	AT1G27950	GLYCOSYLPHOSPHATIDYLINOSITOL-ANCHORED LIPID PROTEIN TRANSFER 1 (LTPG1)	Encodes LTPG1, a lipid transfer protein with a predicted GPI (glycosylphosphatidylinositol)-anchor domain. Localized in the plasma membrane. Disruption of the LTPG1 gene causes alterations of cuticular lipid composition, but no significant changes on total wax and cutin monomer loads are seen. The mRNA is cell-to-cell mobile.
1616	AT1G27990		transmembrane protein
1617	AT1G28010	ATP-BINDING CASSETTE B14 (ABCB14)	Encodes an ATP-binding cassette (ABC) transporter. Expressed in the vascular tissue of primary stem.
1618	AT1G28030		2-oxoglutarate (2OG) and Fe(II)-dependent oxygenase superfamily protein
1619	AT1G28040	ARABIDOPSIS T??XICOS EN LEVADURA 20 (ATL20)	RING/U-box superfamily protein
1620	AT1G28050	B-BOX DOMAIN PROTEIN 13 (BBX13)	B-box type zinc finger protein with CCT domain-containing protein
1621	AT1G28060	RNA-DIRECTED DNA METHYLATION 16 (RDM16)	Pre-mRNA-splicing factor 3
1622	AT1G28070		ATP-dependent RNA helicase
1623	AT1G28080		RING finger protein
1624	AT1G28100		hypothetical protein
1625	AT1G28110	SERINE CARBOXYPEPTIDASE-LIKE 45 (SCPL45)	serine carboxypeptidase-like 45
1626	AT1G28130	GRETCHEN HAGEN 3.17 (GH3.17)	Encodes an IAA-amido synthase that conjugates Asp and other amino acids to auxin in vitro. Lines carrying insertions in this gene are hypersensitive to auxin.
1627	AT1G28135		hypothetical protein
1628	AT1G28140		integral membrane family protein
1629	AT1G28150		hypothetical protein
1630	AT1G28160		encodes a member of the ERF (ethylene response factor) subfamily B-1 of ERF/AP2 transcription factor family. The protein contains one AP2 domain. There are 15 members in this subfamily including ATERF-3, ATERF-4, ATERF-7, and leafy petiole.
1631	AT1G28170	SULPHOTRANSFERASE 7 (SOT7)	sulfotransferase 7
1632	AT1G28190		PADRE protein up-regulated after infection by S. sclerotiorum.
1633	AT1G28260		Telomerase activating protein Est1
1634	AT1G28270	RALF-LIKE 4 (RALFL4)	Member of a diversely expressed predicted peptide family showing sequence similarity to tobacco Rapid Alkalinization Factor (RALF), and is believed to play an essential role in the physiology of Arabidopsis. Consists of a single exon and is characterized by a conserved C-terminal motif and N-terminal signal peptide. RALF4 and RALF19 act redundantly in the pollen tube to regulate pollen tube growt…
1635	AT1G28280	MPK3/6-TARGETED VQP 1 (MVQ1)	VQ motif-containing protein
1636	AT1G28300	LEAFY COTYLEDON 2 (LEC2)	Transcription factor that contains a B3 domain, a DNA-binding motif unique to plants and characteristic of several transcription factors. Plays critical roles both early and late during embryo development. LEC2 RNA accumulates primarily during seed development. LEC2 is required for the maintenance of suspensor morphology, specification of cotyledon identity, progression through the maturation pha…
1637	AT1G28327		E3 ubiquitin-protein ligase
1638	AT1G28330	DORMANCY-ASSOCIATED PROTEIN-LIKE 1 (DYL1)	dormancy-associated protein (DRM1)
1639	AT1G28360	ERF DOMAIN PROTEIN 12 (ERF12)	encodes a member of the ERF (ethylene response factor) subfamily B-1 of ERF/AP2 transcription factor family (ERF12). The protein contains one AP2 domain. There are 15 members in this subfamily including ATERF-3, ATERF-4, ATERF-7, and leafy petiole. Regulates floral development.
1640	AT1G28375		transmembrane protein
1641	AT1G28390		Protein kinase superfamily protein
1642	AT1G28395		hypothetical protein
1643	AT1G28400		GATA zinc finger protein
1644	AT1G28420	HOMEOBOX-1 (HB-1)	homeobox-1
1645	AT1G28430	CYTOCHROME P450, FAMILY 705, SUBFAMILY A, POLYPEPTIDE 24 (CYP705A24)	member of CYP705A
1646	AT1G28440	HAESA-LIKE 1 (HSL1)	HAESA-like 1
1647	AT1G28460	AGAMOUS-LIKE 59 (AGL59)	AGAMOUS-like 59
1648	AT1G28470	NAC DOMAIN CONTAINING PROTEIN 10 (NAC010)	NAC domain containing protein 10
1649	AT1G28480	(GRX480)	Encodes GRX480, a member of the glutaredoxin family that regulates protein redox state. GRX480 interacts with TGA factors and suppresses JA-responsive PDF1.2 transcription. GRX480 transcription is SA-inducible and requires NPR1. Maybe involved in SA/JA cross-talk. It has also been shown to interact with the transcription factor TGA2 and suppress ORA59 promoter activity.
1650	AT1G28500		hypothetical protein (DUF626)
1651	AT1G28510		Optic atrophy 3 protein (OPA3)
1652	AT1G28520	VASCULAR PLANT ONE ZINC FINGER PROTEIN (VOZ1)	VOZ transcription factor which acts as positive regulator of several salt-responsive genes. Functionally redundant in salt stress with VOZ2.
1653	AT1G28540		Tail-anchored (TA) OEP membrane protein which possesses a single C-terminal transmembrane domain targeting post-translationally to plastids.
1654	AT1G28550	RAB GTPASE HOMOLOG A1I (RABA1i)	RAB GTPase homolog A1I
1655	AT1G28570		SGNH hydrolase-type esterase superfamily protein
1656	AT1G28580		GDSL-motif esterase/acyltransferase/lipase. Enzyme group with broad substrate specificity that may catalyze acyltransfer or hydrolase reactions with lipid and non-lipid substrates.
1657	AT1G28590		GDSL-motif esterase/acyltransferase/lipase. Enzyme group with broad substrate specificity that may catalyze acyltransfer or hydrolase reactions with lipid and non-lipid substrates.
1658	AT1G28600	GUARD-CELL-ENRICHED GDSL LIPASE 2 (GGL2)	GDSL-motif esterase/acyltransferase/lipase. Enzyme group with broad substrate specificity that may catalyze acyltransfer or hydrolase reactions with lipid and non-lipid substrates.
1659	AT1G28610	GUARD-CELL-ENRICHED GDSL LIPASE 3 (GGL3)	GDSL-motif esterase/acyltransferase/lipase. Enzyme group with broad substrate specificity that may catalyze acyltransfer or hydrolase reactions with lipid and non-lipid substrates.
1660	AT1G28630		transcriptional regulator EFH1-like protein
1661	AT1G28640		GDSL-motif esterase/acyltransferase/lipase. Enzyme group with broad substrate specificity that may catalyze acyltransfer or hydrolase reactions with lipid and non-lipid substrates.
1662	AT1G28650		GDSL-motif esterase/acyltransferase/lipase. Enzyme group with broad substrate specificity that may catalyze acyltransfer or hydrolase reactions with lipid and non-lipid substrates.
1663	AT1G28670	(ARAB-1)	Arabidopsis thaliana lipase
1664	AT1G28680	COUMARIN SYNTHASE (COSY)	Catalyses trans-cis isomerization and lactonization in the biosynthesis of coumarins in roots.
1665	AT1G28690		Tetratricopeptide repeat (TPR)-like superfamily protein
1666	AT1G28710		Nucleotide-diphospho-sugar transferase family protein
1667	AT1G28960	NUDIX HYDROLASE HOMOLOG 15 (NUDX15)	Encodes a ppGpp pyrophosphohydrolase.
1668	AT1G29020		Calcium-binding EF-hand family protein
1669	AT1G29040		50S ribosomal protein L34
1670	AT1G29050	TRICHOME BIREFRINGENCE-LIKE 38 (TBL38)	Encodes a member of the TBL (TRICHOME BIREFRINGENCE-LIKE) gene family containing a plant-specific DUF231 (domain of unknown function) domain. TBL gene family has 46 members, two of which (TBR/AT5G06700 and TBL3/AT5G01360) have been shown to be involved in the synthesis and deposition of secondary wall cellulose, presumably by influencing the esterification state of pectic polymers. A nomenclature…
1671	AT1G29070	PLASTID RIBOSOMAL PROTEINS OF THE 50S SUBUNIT 34 (PRPL34)	Ribosomal protein L34
1672	AT1G29080		Papain family cysteine protease
1673	AT1G29090		Cysteine proteinases superfamily protein
1674	AT1G29110		Cysteine proteinases superfamily protein
1675	AT1G29130
1676	AT1G29140		Pollen Ole e 1 allergen and extensin family protein
1677	AT1G29160	COGWHEEL1 (COG1)	Encodes a DOF transcription factor involved in seed coat development. Regulates PRX2 and PRX25, involved in seed longevity.
1678	AT1G29180		Cysteine/Histidine-rich C1 domain family protein
1679	AT1G29195		PADRE protein up-regulated after infection by S. sclerotiorum.
1680	AT1G29200		O-fucosyltransferase family protein
1681	AT1G29230	CBL-INTERACTING PROTEIN KINASE 18 (CIPK18)	Encodes a member of the SNF1-related kinase (SnRK) gene family (SnRK3.20), which has also been reported as a member of the CBL-interacting protein kinases (CIPK18).
1682	AT1G29240		transcription initiation factor TFIID subunit, putative (DUF688)
1683	AT1G29270		transcription factor bHLH35-like protein
1684	AT1G29280	WRKY DNA-BINDING PROTEIN 65 (WRKY65)	member of WRKY Transcription Factor; Group II-e The mRNA is cell-to-cell mobile.
1685	AT1G29330	ENDOPLASMIC RETICULUM RETENTION DEFECTIVE 2 (ERD2)	Encodes a protein similar in sequence to animal and yeast endoplasmic reticulum retention signal receptor. This protein can functionally complement the yeast homologue. Transcript is detected in flower buds, stems, root, and leaves.
1686	AT1G29340	PLANT U-BOX 17 (PUB17)	Encodes a protein containing a UND, a U-box, and an ARM domain. This protein has E3 ubiquitin ligase activity. It is required for cell death and full resistance specified by Arabidopsis RPM1 and RPS4 resistance proteins against Pseudomonas syringae pv tomato. The mRNA is cell-to-cell mobile.
1687	AT1G29390	COLD REGULATED 314 THYLAKOID MEMBRANE 2 (COR314-TM2)	Integral membrane protein in the inner envelope of chloroplasts. Provide freezing tolerance.
1688	AT1G29395	COLD REGULATED 314 INNER MEMBRANE 1 (COR413IM1)	Integral membrane protein in the inner envelope of chloroplasts. Provide freezing tolerance. Expression is induced by short-term cold-treatment, water deprivation, and abscisic acid treatment. involved in response to salt tolerance
1689	AT1G29400	MEI2-LIKE PROTEIN 5 (ML5)	A member of mei2-like gene family, predominantly plant-based family of genes encoding RNA binding proteins with characteristic presence of a highly conserved RNA binding motif first described in the mei2 gene of the fission yeast S. pombe. In silico analyses reveal nine mei2 -like genes in A. thaliana. They were grouped into four distinct clades, based on overall sequence similarity and subfamily…
1690	AT1G29430	SMALL AUXIN UPREGULATED RNA 62 (SAUR62)	SAUR762 expression is induced during pollination and expressed in pollen tubes. SAUR62 likely functions in translation of proteins required for pollen tube development/function.
1691	AT1G29440	SMALL AUXIN UP RNA 63 (SAUR63)	SAUR-like auxin-responsive protein family
1692	AT1G29450	SMALL AUXIN UPREGULATED RNA 64 (SAUR64)	SAUR-like auxin-responsive protein family
1693	AT1G29460	SMALL AUXIN UPREGULATED RNA 65 (SAUR65)	SAUR-like auxin-responsive protein family
1694	AT1G29480		hypothetical protein
1695	AT1G29490	SMALL AUXIN UPREGULATED 68 (SAUR68)	SAUR-like auxin-responsive protein family
1696	AT1G29500	SMALL AUXIN UPREGULATED RNA 66 (SAUR66)	SAUR-like auxin-responsive protein family
1697	AT1G29510	SMALL AUXIN UPREGULATED RNA 67 (SAUR67)	This locus was referred to as SAUR68 in PMID:17948056 but the nomenclature should be SAUR67.
1698	AT1G29520		AWPM-19-like family protein
1699	AT1G29530		hypothetical protein
1700	AT1G29570		Zinc finger C-x8-C-x5-C-x3-H type family protein
1701	AT1G29600		Zinc finger C-x8-C-x5-C-x3-H type family protein
1702	AT1G29610
1703	AT1G29620		Cytochrome C oxidase polypeptide VIB family protein
1704	AT1G29630		5-3 exonuclease family protein
1705	AT1G29650		transposable_element_gene;non-LTR retrotransposon family (LINE), has a 1.5e-28 P-value blast match to GB:NP_038603 L1 repeat, Tf subfamily, member 23 (LINE-element) (Mus musculus);(source:TAIR10)
1706	AT1G29660	(GGL5)	GDSL-motif esterase/acyltransferase/lipase. Enzyme group with broad substrate specificity that may catalyze acyltransfer or hydrolase reactions with lipid and non-lipid substrates.
1707	AT1G29670	(GDSL1)	GDSL-motif esterase/acyltransferase/lipase. Enzyme group with broad substrate specificity that may catalyze acyltransfer or hydrolase reactions with lipid and non-lipid substrates. The mRNA is cell-to-cell mobile.
1708	AT1G29680		histone acetyltransferase (DUF1264)
1709	AT1G29690	CONSTITUTIVELY ACTIVATED CELL DEATH 1 (CAD1)	Encodes a protein containing a domain with significant homology to the MACPF (membrane attack complex and perforin) domain of complements and perforin proteins that are involved in innate immunity in animals. Transgenic <i>cad1-1</i> mutant plants show lesions seen in the hypersensitive response, as well as a spontaneous activation of expression of pathogenesis-related genes and leading to a 32-f…
1710	AT1G29700		Metallo-hydrolase/oxidoreductase superfamily protein
1711	AT1G29720	RKF-LIKE 1 (RKFL1)	Encodes one of three RECEPTOR-LIKE KINASE IN FLOWERS 1 (RKF1) paralogues that is required in the stigmatic papillae and the female reproductive tract to promote compatible pollen grain hydration and pollen tube growth.
1712	AT1G29730	RKF-LIKE 2 (RKFL2)	Encodes one of three RECEPTOR-LIKE KINASE IN FLOWERS 1 (RKF1) paralogues that is required in the stigmatic papillae and the female reproductive tract to promote compatible pollen grain hydration and pollen tube growth.
1713	AT1G29770		Haloacid dehalogenase-like hydrolase (HAD) superfamily protein
1714	AT1G29780		Haloacid dehalogenase-like hydrolase (HAD) superfamily protein
1715	AT1G29790		S-adenosyl-L-methionine-dependent methyltransferases superfamily protein
1716	AT1G29820		Magnesium transporter CorA-like family protein
1717	AT1G29860	WRKY DNA-BINDING PROTEIN 71 (WRKY71)	member of WRKY Transcription Factor; Group II-c
1718	AT1G29870		tRNA synthetase class II (G, H, P and S) family protein
1719	AT1G29910	CHLOROPHYLL A/B BINDING PROTEIN 3 (CAB3)	member of Chlorophyll a/b-binding protein family
1720	AT1G29940	NUCLEAR RNA POLYMERASE A2 (NRPA2)	Encodes a subunit of RNA polymerase 1 (aka RNA polymerase A).
1721	AT1G29950	(SACL3)	basic helix-loop-helix (bHLH) DNA-binding superfamily protein
1722	AT1G29960		Peptidase S24/S26A/S26B/S26C family protein
1723	AT1G30000	ALPHA-MANNOSIDASE 3 (MNS3)	alpha-mannosidase 3
1724	AT1G30010	NUCLEAR MATURASE 1 (NMAT1)	Analysis of the RNA profiles of wild-type and mutant plants establishes a role for nMAT1 in the trans-splicing of nad1 intron 1 and in the cis-splicing of nad2 intron 1 and nad4 intron 2.
1725	AT1G30020	(SVB4)	SVB family gene.
1726	AT1G30040	GIBBERELLIN 2-OXIDASE (GA2OX2)	Encodes a gibberellin 2-oxidase that acts on C-19 gibberellins. AtGA2OX2 expression is responsive to cytokinin and KNOX activities.
1727	AT1G30070		SGS domain-containing protein
1728	AT1G30080		Glycosyl hydrolase superfamily protein
1729	AT1G30100	NINE-CIS-EPOXYCAROTENOID DIOXYGENASE 5 (NCED5)	Encodes 9-cis-epoxycarotenoid dioxygenase, a key enzyme in the biosynthesis of abscisic acid. The expression of this gene increases during the first 6h of imbibition.
1730	AT1G30110	NUDIX HYDROLASE HOMOLOG 25 (NUDX25)	Encodes a ppGpp pyrophosphohydrolase.
1731	AT1G30120	PYRUVATE DEHYDROGENASE E1 BETA (PDH-E1 BETA)	Encodes a putative plastid pyruvate dehydrogenase E1 beta subunit that is distinct from the mitochondrial pyruvate dehydrogenase E1 beta subunit.
1732	AT1G30140		Myb/SANT-like DNA-binding domain protein
1733	AT1G30150		transposable_element_gene;CACTA-like transposase family (Tnp1/En/Spm), has a 2.2e-24 P-value blast match to ref|NP_189784.1| TNP1-related protein (Arabidopsis thaliana) (CACTA-element);(source:TAIR10)
1734	AT1G30160	DUF295 ORGANELLAR A 3 (ATDOA3)	hypothetical protein (DUF295)
1735	AT1G30200		F-box family protein
1736	AT1G30210	TEOSINTE BRANCHED 1, CYCLOIDEA, AND PCF FAMILY 24 (TCP24)	TCP family protein involved in heterochronic regulation of leaf differentiation.
1737	AT1G30220	INOSITOL TRANSPORTER 2 (INT2)	Inositol transporter presenting conserved extracellular loop domains homologs of plexins/semaphorin/integrin (PSI) domains from animal type I receptors.
1738	AT1G30240		proline-, glutamic acid/leucine-rich protein
1739	AT1G30250		hypothetical protein
1740	AT1G30260		galactosyltransferase family protein
1741	AT1G30270	CBL-INTERACTING PROTEIN KINASE 23 (CIPK23)	Arabidopsis thaliana CBL-interacting protein kinase 23. CIPK23 serves as a positive regulator of the potassium transporter AKT1 by directly phosphorylating AKT1. CIPK23 is activated by the binding of two calcineurin B-like proteins, CBL1 and CBL9. The mRNA is cell-to-cell mobile.
1742	AT1G30300		Metallo-hydrolase/oxidoreductase superfamily protein
1743	AT1G30350		Pectin lyase-like superfamily protein
1744	AT1G30380	PHOTOSYSTEM I SUBUNIT K (PSAK)	Encodes subunit K of photosystem I reaction center. The mRNA is cell-to-cell mobile.
1745	AT1G30410	ATP-BINDING CASSETTE C12 (ABCC12)	member of MRP subfamily
1746	AT1G30440		Phototropic-responsive NPH3 family protein
1747	AT1G30450	CATION-CHLORIDE CO-TRANSPORTER 1 (CCC1)	member of Cation-chloride co-transporter family
1748	AT1G30460	CLEAVAGE AND POLYADENYLATION SPECIFICITY FACTOR 30 (CPSF30)	Encodes AtCPSF30, the 30-KDa subunit of cleavage and polyadenylation specificity factor. AtCPSF30 is a probable processing endonuclease. Nucleus-localized RNA binding protein capable of interacting with itself and with calmodulin. Its RNA-binding activity is inhibited by calmodulin in a calcium-dependent fashion.
1749	AT1G30470		SIT4 phosphatase-associated family protein
1750	AT1G30490	PHAVOLUTA (PHV)	Dominant PHV mutations cause transformation of abaxial leaf fates into adaxial leaf fates. Has overlapping functions with PHABULOSA, REVOLUTA and CORONA/ATHB15 in patterning the apical portion of the embryo. Encodes a member of HD-Zip family which contains homeodomain-leucine zipper domains and domain similar to a mammalian sterol binding domain.
1751	AT1G30500	NUCLEAR FACTOR Y, SUBUNIT A7 (NF-YA7)	nuclear factor Y, subunit A7
1752	AT1G30510	ROOT FNR 2 (RFNR2)	Encodes a root-type ferredoxin:NADP(H) oxidoreductase.
1753	AT1G30515		GATA zinc finger protein
1754	AT1G30520	ACYL-ACTIVATING ENZYME 14 (AAE14)	Encodes a chloroplast O-succinylbenzoyl-CoA ligase. Involved in phylloquinone biosynthesis. Knock mutant is seedling lethal.
1755	AT1G30530	UDP-GLUCOSYL TRANSFERASE 78D1 (UGT78D1)	The At1g30530 gene encodes a UDP-rhamnose:flavonol-3-O-rhamnosyltransferase (UGT78D1) attaching a rhamnosyl residue to the 3-O-position of the flavonols kaempferol and quercetin
1756	AT1G30550		S-adenosyl-L-methionine-dependent methyltransferase superfamily protein
1757	AT1G30560	GLYCEROL-3-PHOSPHATE PERMEASE 3 (G3Pp3)	Encodes a member of the phosphate starvation-induced glycerol-3-phosphate permease gene family: AT3G47420(G3Pp1), AT4G25220(G3Pp2), AT1G30560(G3Pp3), AT4G17550(G3Pp4) and AT2G13100(G3Pp5).
1758	AT1G30570	HERCULES RECEPTOR KINASE 2 (HERK2)	Encodes HERCULES2 (HERK2), a receptor kinase regulated by Brassinosteroids and required for cell elongation during vegetative growth.
1759	AT1G30610	EMBRYO DEFECTIVE 2279 (emb2279)	Pentatricopeptide repeat protein .Mutations in this locus result in embryo lethality due to defects in chloroplast development. Embryo shape at seed maturity is globular.
1760	AT1G30620	MURUS 4 (MUR4)	encodes a type-II membrane protein that catalyzes 4-epimerization of UDP-D-Xylose to UDP-L-Arabinose in vitro, the nucleotide sugar used by glycosyltransferases in the arabinosylation of cell wall polysaccharides and wall-resident proteoglycans.
1761	AT1G30640	NUCLEAR DBF2-RELATED 7 (NDR7)	Ubiquitously expressed protein kinase.
1762	AT1G30650	WRKY DNA-BINDING PROTEIN 14 (WRKY14)	member of WRKY Transcription Factor; Group II-e
1763	AT1G30660	(TWINKY)	A truncated version of Twinkle that retains only the DNA primase domain.
1764	AT1G30690	(PATL4)	Sec14p-like phosphatidylinositol transfer family protein
1765	AT1G30700	(ATBBE8)	FAD-binding Berberine family protein
1766	AT1G30710	(ATBBE9)	FAD-binding Berberine family protein
1767	AT1G30720	(ATBBE10)	FAD-binding Berberine family protein
1768	AT1G30740	(ATBBE12)	FAD-binding Berberine family protein
1769	AT1G30750		TPRXL
1770	AT1G30760	BERBERINE BRIDGE ENZYME-LIKE 13 (ATBBE-LIKE 13)	Encodes a BBE-like enzyme that acts in monolignol metabolism by catalyzing the oxidation of aromatic allylic alcohols, such as coumaryl-, sinapyl-, and coniferyl alcohol, to the corresponding aldehydes. The mRNA is cell-to-cell mobile.
1771	AT1G30780		F-box associated ubiquitination effector family protein
1772	AT1G30790		F-box and associated interaction domains-containing protein
1773	AT1G30795		Glycine-rich protein family
1774	AT1G30800		Fasciclin-like arabinogalactan family protein
1775	AT1G30810	JUMONJI DOMAIN-CONTAINING PROTEIN 18 (JMJ18)	JMJ18 encodes a novel JmjC domain- containing histone H3K4 demethylase. PHD finger-containing protein.
1776	AT1G30840	PURINE PERMEASE 4 (PUP4)	Member of a family of proteins related to PUP1, a purine transporter. May be involved in the transport of purine and purine derivatives such as cytokinins, across the plasma membrane.
1777	AT1G30850	ROOT HAIR SPECIFIC 4 (RSH4)	root hair specific 4
1778	AT1G30860		RING/U-box superfamily protein
1779	AT1G30870	PEROXIDASE7 (PER7)	Peroxidase superfamily protein
1780	AT1G30880		hypothetical protein
1781	AT1G30900	VACUOLAR SORTING RECEPTOR 6 (VSR6)	VACUOLAR SORTING RECEPTOR 6
1782	AT1G30940		pseudogene of F-box family protein
1783	AT1G30950	UNUSUAL FLORAL ORGANS (UFO)	Required for the proper identity of the floral meristem. Involved in establishing the whorled pattern of floral organs, in the control of specification of the floral meristem, and in the activation of APETALA3 and PISTILLATA. UFO is found at the AP3 promoter in a LFY-dependent manner, suggesting that it works with LFY to regulate AP3 expression. UFO may also promote the ubiquitylation of LFY.
1784	AT1G30960	(ERA-2)	Ortholog of ERA (E. coli RAS-like protein)-related GTPase (ERG). Mitochondrial protein that associates with 18sRNA. Heterozygous mutants segregate for embryo lethality inherited as a sporphytic maternal effect. Increased ROS in the mutant ovule suggests a heritable mitochondrial defect results in lethality.
1785	AT1G30990		Polyketide cyclase/dehydrase and lipid transport superfamily protein
1786	AT1G31000		F-box/associated interaction domain protein
1787	AT1G31030		transposable_element_gene;non-LTR retrotransposon family (LINE), has a 1.0e-41 P-value blast match to GB:NP_038603 L1 repeat, Tf subfamily, member 23 (LINE-element) (Mus musculus);(source:TAIR10)
1788	AT1G31050	PERICYCLE FACTOR TYPE-A 1 (PFA1)	Together with PFA2 and PFA3 governs the competence of pericycle cells to initiate lateral root primordium formation.
1789	AT1G31060
1790	AT1G31070	N-ACETYLGLUCOSAMINE-1-PHOSPHATE URIDYLYLTRANSFERASE 1 (GlcNAc1pUT1)	Encodes a protein that functions as an N-acetylglucosamine-1-phosphate uridylyltransferase that catalyzes the formation of UDP-N-acetylglucosamine (UDP-GlcNAc). This is an essential precursor for glycolipid and glycoprotein synthesis and is also used for regulatory protein modification in signaling pathways. The enzyme can also catalyze the reverse reaction using both UDP-GlcNAc and the less comm…
1791	AT1G31080		F-box family protein
1792	AT1G31120	K+ UPTAKE PERMEASE 10 (KUP10)	potassium transporter
1793	AT1G31150		K-box region protein (DUF1985)
1794	AT1G31170	SULFIREDOXIN (SRX)	encodes a cysteine-sulfinic acid reductase (sulfiredoxin - EC 1.8.98.2) capable of reducing overoxidized plastidic 2-Cys-Prx involved in peroxide detoxification and response to oxidative stress
1795	AT1G31180	ISOPROPYLMALATE DEHYDROGENASE 3 (IMD3)	The AtIMD3 is one out of 3 genes encoding the enzyme 3-isopropylmalate dehydrogenase involved in leucine biosynthesis in Arabidopsis. Its subcellular location has been targeted to plastids.
1796	AT1G31200	PHLOEM PROTEIN 2-A9 (PP2-A9)	phloem protein 2-A9
1797	AT1G31210		transposable_element_gene;copia-like retrotransposon family, has a 2.3e-253 P-value blast match to dbj|BAA78425.1| polyprotein (Arabidopsis thaliana) (AtRE1) (Ty1_Copia-element);(source:TAIR10)
1798	AT1G31230	ASPARTATE KINASE-HOMOSERINE DEHYDROGENASE I (AK-HSDH I)	Encodes a bifunctional aspartate kinase/homoserine dehydrogenase. These two activities catalyze the first and the third steps toward the synthesis of the essential amino acids threonine, isoleucine and methionine.
1799	AT1G31250		proline-rich family protein
1800	AT1G31260	ZINC TRANSPORTER 10 PRECURSOR (ZIP10)	member of Fe(II) transporter isolog family
1801	AT1G31270		hypothetical protein
1802	AT1G31280	ARGONAUTE 2 (AGO2)	Encodes Argonaute gene that binds viral siRNAs and is involved in antiviral defense response. Regulates innate immunity.Mutants have increased susceptibility to Potato virus X and tobacco rattle virus.
1803	AT1G31290	ARGONAUTE 3 (AGO3)	ARGONAUTE 3
1804	AT1G31310		hydroxyproline-rich glycoprotein family protein
1805	AT1G31320	LOB DOMAIN-CONTAINING PROTEIN 4 (LBD4)	LOB domain-containing protein 4
1806	AT1G31330	PHOTOSYSTEM I SUBUNIT F (PSAF)	Encodes subunit F of photosystem I.
1807	AT1G31335		transmembrane protein
1808	AT1G31350	KAR-UP F-BOX 1 (KUF1)	KAR-UP F-box 1
1809	AT1G31360	RECQ HELICASE L2 (RECQL2)	Encodes a (d)NTP-dependent 3'->5' DNA helicase. This protein can also disrupt D loop structures and may mediate branch migration of Holliday junctions when tested in vitro. The unwinding activity of the enzyme depends on the presence of divalent cations (Mg2+, Mn2+, or Ca2+, but not Zn2+).(d)NTPs are also required with ATP and dATP supporting the greatest amount of DNA unwinding in vitro.
1810	AT1G31370		Ubiquitin-specific protease family C19-related protein
1811	AT1G31380		TRAF-like family protein
1812	AT1G31400		TRAF-like family protein
1813	AT1G31450	(ECS1)	Encodes an egg cell specific endopeptidase that is secreted upon successful fertilization (gamete fusion). The secreted protein targets the pollen attractant, LURE1.2 to effectively block polytuby.
1814	AT1G31490		HXXXD-type acyl-transferase family protein
1815	AT1G31510		F-box associated ubiquitination effector family protein
1816	AT1G31520		hypothetical protein
1817	AT1G31530	CATABOLITE REPRESSOR 4G (CCR4G)	Deadenylase.
1818	AT1G31540		Disease resistance protein (TIR-NBS-LRR class) family
1819	AT1G31550		GDSL-motif esterase/acyltransferase/lipase. Enzyme group with broad substrate specificity that may catalyze acyltransfer or hydrolase reactions with lipid and non-lipid substrates.
1820	AT1G31580	(ECS1)	Encodes cell wall protein. ECS1 is not a Xcc750 resistance gene, but the genetic data indicate that ECS1 is linked to a locus influencing resistance to Xcc750. The mRNA is cell-to-cell mobile.
1821	AT1G31600	TRNA METHYLTRANSFERASE 9 (TRM9)	RNA-binding (RRM/RBD/RNP motifs) family protein
1822	AT1G31620		hypothetical protein
1823	AT1G31630	AGAMOUS-LIKE 86 (AGL86)	AGAMOUS-like 86
1824	AT1G31640	AGAMOUS-LIKE 92 (AGL92)	A paternally expressed imprinted gene.
1825	AT1G31650	ROP (RHO OF PLANTS) GUANINE NUCLEOTIDE EXCHANGE FACTOR 14 (ROPGEF14)	Encodes a member of KPP-like gene family, homolog of KPP (kinase partner protein) gene in tomato. Also a member of the RopGEF (guanine nucleotide exchange factor) family, containing the novel PRONE domain (plant-specific Rop nucleotide exchanger), which is exclusively active towards members of the Rop subfamily.
1826	AT1G31660	ESSENTIAL NUCLEAR PROTEIN 1 (ENP1)	Encodes a protein that is a ribosome biogenesis co-factor. Mutants display aberrant RNA processing and male and female gametophyte development.
1827	AT1G31670		Copper amine oxidase family protein
1828	AT1G31680
1829	AT1G31690	COPPER AMINE OXIDASE ALPHA 2 (CuAOalpha2)	Copper amine oxidase family protein
1830	AT1G31700
1831	AT1G31710	COPPER AMINE OXIDASE ALPHA 3 (CuAOalpha3)	Copper amine oxidase family protein
1832	AT1G31720	MODIFYING WALL LIGNIN-1 (MWL1)	chitin synthase, putative (DUF1218)
1833	AT1G31750	GLYCINE AND PROLINE RICH PROTEIN 1 (GPRP1)	proline-rich family protein
1834	AT1G31770	ATP-BINDING CASSETTE G14 (ABCG14)	ATP-binding cassette 14
1835	AT1G31790		Tetratricopeptide repeat (TPR)-like superfamily protein
1836	AT1G31812	ACYL-COA-BINDING PROTEIN 6 (ACBP6)	Acyl-CoA-binding protein. Bind acyl-CoA esters and protect acyl-CoAs from degradation by microsomal acyl-hydrolases. Plays a role in determining seed oil content.
1837	AT1G31817	NUCLEAR FUSION DEFECTIVE 3 (NFD3)	Ribosomal L18p/L5e family protein
1838	AT1G31820	POLYAMINE UPTAKE TRANSPORTER 1 (PUT1)	Encodes POLYAMINE UPTAKE TRANSPORTER 1, an amino acid permease family protein.
1839	AT1G31830	POLYAMINE UPTAKE TRANSPORTER 2 (PUT2)	Encodes POLYAMINE UPTAKE TRANSPORTER 2, an amino acid permease family protein.
1840	AT1G31840		Tetratricopeptide repeat (TPR)-like superfamily protein
1841	AT1G31850		S-adenosyl-L-methionine-dependent methyltransferases superfamily protein
1842	AT1G31910		GHMP kinase family protein
1843	AT1G31920		Tetratricopeptide repeat (TPR)-like superfamily protein
1844	AT1G31930	EXTRA-LARGE GTP-BINDING PROTEIN 3 (XLG3)	Encodes XLG3 (extra-large G protein 3) that shows significant similarity to the G protein alpha subunit in its C terminal region. Involved in the regulation of root morphological and growth responses.
1845	AT1G31940		cystic fibrosis transmembrane conductance regulator
1846	AT1G31950	TERPENE SYNTHASE 29 (TPS29)	Sesterterpene synthase which produces various sesterpne backbones bia type-A cyclization mechanism.
1847	AT1G31960		hypothetical protein
1848	AT1G31970	STRESS RESPONSE SUPPRESSOR 1 (STRS1)	DEA(D/H)-box RNA helicase family protein
1849	AT1G32000		hypothetical protein
1850	AT1G32010		myosin heavy chain-like protein
1851	AT1G32020		F-box family protein
1852	AT1G32030		plant-specific B3-DNA-binding domain protein (DUF313)
1853	AT1G32040		transposable_element_gene;similar to unknown protein [Arabidopsis thaliana] (TAIR:AT4G06603.1);(source:TAIR10)
1854	AT1G32060	PHOSPHORIBULOKINASE (PRK)	phosphoribulokinase
1855	AT1G32070	NUCLEAR SHUTTLE INTERACTING (NSI)	Encodes a acetyltransferase (NSI) that is localized in the nucleus and chloroplast. It interacts with the geminivirus movement protein NSP. This interaction is required for viral infection and systemic spread. Acetylates the viral coat protein (CP) in vitro, but not NSP. NSP inhibits NSI activity in vitro. In the chloroplast NSI functions in the dynamic reorganization thylakoid membrane complexes…
1856	AT1G32080	(LrgB)	Encodes a plant LrgAB/CidAB protein localized to the chloroplast envelope that is involved in chloroplast development, carbon partitioning, ABA/drought response, and leaf senescence. The gene may have evolved from gene fusion of bacterial lrgA and lrgB.
1857	AT1G32100	PINORESINOL REDUCTASE 1 (PRR1)	Encodes a pinoresinol reductase involved in lignan biosynthesis. Expressed strongly in roots and less strongly in stems. Shows specificity for pinoresinol and not lariciresinol.
1858	AT1G32120		serine/threonine-protein phosphatase 7 long form-like protein
1859	AT1G32170	XYLOGLUCAN ENDOTRANSGLUCOSYLASE/HYDROLASE 30 (XTH30)	xyloglucan endotransglycosylase-related protein (XTR4) The mRNA is cell-to-cell mobile.
1860	AT1G32180	CELLULOSE SYNTHASE-LIKE D6 (CSLD6)	encodes a gene similar to cellulose synthase
1861	AT1G32190		alpha/beta-Hydrolases superfamily protein
1862	AT1G32200	(ATS1)	Encodes a chloroplast glycerol-3-phosphate acyltransferase.Involved in the biosynthesis of chloroplast phosphatidylglycerol.
1863	AT1G32220		NAD(P)-binding Rossmann-fold superfamily protein
1864	AT1G32230	RADICAL-INDUCED CELL DEATH1 (RCD1)	Encodes a protein belonging to the (ADP-ribosyl)transferase domain-containing subfamily of WWE protein-protein interaction domain protein family. Superoxide radicals are necessary and sufficient to propagate cell death or lesion formation in rcd1 mutants. Without stress treatment, RCD1 is localized in the nucleus. Under high salt or oxidative stress, RCD1 is found not only in the nucleus but also…
1865	AT1G32240	KANADI 2 (KAN2)	Encodes a member of the KANADI family of putative transcription factors. Together with KAN1, this gene appears to be involved in the development of the carpel and the outer integument of the ovule.Along with KAN1 and KAN4 appears to regulate the proper localization of PIN1 in early embryogenesis.
1866	AT1G32250		Calcium-binding EF-hand family protein
1867	AT1G32270	(ATSYP24)	member of SYP2 Gene Family
1868	AT1G32290
1869	AT1G32300	L -GULONO-1,4-LACTONE ( L -GULL) OXIDASE 1 (GULLO1)	D-arabinono-1,4-lactone oxidase family protein
1870	AT1G32330	HEAT SHOCK TRANSCRIPTION FACTOR A1D (HSFA1D)	Member of Heat Stress Transcription Factor (Hsf) family. Negatively regulated by HSP90.2.
1871	AT1G32350	ALTERNATIVE OXIDASE 1D (AOX1D)	Alternative oxidase (AOX); terminal oxidases of electron transfer in mitochondria.
1872	AT1G32360		Zinc finger (CCCH-type) family protein
1873	AT1G32375		F-box/RNI-like/FBD-like domains-containing protein
1874	AT1G32390		transposable_element_gene;similar to unknown protein [Arabidopsis thaliana] (TAIR:AT4G11710.1);(source:TAIR10)
1875	AT1G32400	TOBAMOVIRUS MULTIPLICATION 2A (TOM2A)	TOM2A encodes a 280 amino acid putative four-pass transmembrane protein with a C-terminal farnesylation signal, essential for efficient multiplication of tobacco mosaic viruses.
1876	AT1G32430		F-box and associated interaction domains-containing protein
1877	AT1G32450	NRT1/ PTR FAMILY 7.3 (NPF7.3)	Transmembrane nitrate transporter. Involved in xylem transport of nitrate from root to shoot. Induced in response to high and low concentrations of nitrate. Not involved in nitrate uptake. Expressed in root pericycle cells under the control of MYB59. Also functions as a proton-coupled H+/K+ antiporter for K+ loading into the xylem.
1878	AT1G32470	(GDC-H1)	Single hybrid motif superfamily protein
1879	AT1G32480	ISOCITRATE DEHYDROGENASE IV (IDH-IV)	Predicted to encode a protein related isocitrate dehydrogenases, but it appears to be missing the sequences encoding the N-terminal portion of the protein.
1880	AT1G32520	OXIDATION RESISTANCE 4 (OXR4)	TLDc domain protein
1881	AT1G32530	PP2CA INTERACTING RING FINGER PROTEIN 2 (PIR2)	RING/U-box superfamily protein
1882	AT1G32540	LSD ONE LIKE 1 (LOL1)	Encodes a protein with 3 plant-specific zinc finger domains that acts as a positive regulator of cell death.
1883	AT1G32550	FERREDOXIN C 2 (FdC2)	Encodes FdC2, a ferredoxin protein capable of alternative electron partitioning. FdC1 level increases in conditions of acceptor limitation at PSI.
1884	AT1G32560	LATE EMBRYOGENESIS ABUNDANT 4-1 (AtLEA4-1)	Encodes LEA4-1, a member of the Late Embryogenesis Abundant (LEA) proteins which typically accumulate in response to low water availability conditions imposed during development or by the environment.
1885	AT1G32570		hypothetical protein
1886	AT1G32580	MULTIPLE ORGANELLAR RNA EDITING FACTOR 5 (MORF5)	Member of MORF family consisting of of nine full-length proteins encoded in the nuclear genome. MORF proteins are required for all RNA editing events in plastids and for many, possibly also all, sites in mitochondria. Potential link between the RNA binding PPR protein and the protein contributing the enzymatic activity in RNA editing.
1887	AT1G32590		transposable_element_gene;copia-like retrotransposon family, has a 1.2e-230 P-value blast match to gb|AAO73527.1| gag-pol polyprotein (Glycine max) (SIRE1) (Ty1_Copia-family);(source:TAIR10)
1888	AT1G32600		F-box associated ubiquitination effector family protein
1889	AT1G32640	(MYC2)	Encodes a MYC-related transcriptional activator with a typical DNA binding domain of a basic helix-loop-helix leucine zipper motif. Binds to an extended G-Box promoter motif and interacts with Jasmonate ZIM-domain proteins. MYC2 interacts with EIN3 and EIL1 to repress hook curvature and resistance to Botrytis cinera.Its transcription is induced by dehydration stress, ABA treatment and blue light …
1890	AT1G32650		hypothetical protein
1891	AT1G32660		F-box and associated interaction domains-containing protein
1892	AT1G32670
1893	AT1G32680		transposable_element_gene;similar to unknown protein [Arabidopsis thaliana] (TAIR:AT5G35880.1);(source:TAIR10)
1894	AT1G32690		DUF740 family protein
1895	AT1G32700		PLATZ transcription factor family protein
1896	AT1G32740		SBP (S-ribonuclease binding protein) family protein
1897	AT1G32750	(HAF01)	This gene is predicted to encode a histone acetyltransferase. Five lines with RNAi constructs directed against HAF1 grow normally and can produce root calli, but have defects in agrobacterium-mediated transformation.
1898	AT1G32760		Glutaredoxin family protein
1899	AT1G32770	NAC DOMAIN CONTAINING PROTEIN 12 (NAC012)	Encodes SND1, a NAC Domain transcription factor involved in secondary wall biosynthesis in fibers. Expressed specifically in interfascicular fibers and xylary fibers in stems. Expressed in the procambium of stem inflorescences and root. May act as a negative regulator of secondary wall thickening in xylary fibers. Acts redundantly with NST1 to control development of secondary walls in siliques.
1900	AT1G32780		GroES-like zinc-binding dehydrogenase family protein
1901	AT1G32790	CTC-INTERACTING DOMAIN 11 (CID11)	RNA-binding protein, putative, similar to RNA-binding protein GB:CAB40027 GI:4539439 from (Arabidopsis thaliana).Member of a family of PAB2 binding domain proteins.
1902	AT1G32800
1903	AT1G32830		transposable_element_gene;similar to heat shock protein binding [Arabidopsis thaliana] (TAIR:AT3G30450.1);(source:TAIR10)
1904	AT1G32840		transposable_element_gene;similar to Ulp1 protease family protein [Arabidopsis thaliana] (TAIR:AT3G47260.1);(source:TAIR10)
1905	AT1G32850	UBIQUITIN-SPECIFIC PROTEASE 11 (UBP11)	ubiquitin-specific protease 11
1906	AT1G32860		Glycosyl hydrolase superfamily protein
1907	AT1G32870	NAC DOMAIN PROTEIN 13 (NAC13)	Expression in rosette leaves is activated by high concentration of boron.
1908	AT1G32880		ARM repeat superfamily protein
1909	AT1G32900	GRANULE BOUND STARCH SYNTHASE 1 (GBSS1)	UDP-Glycosyltransferase superfamily protein
1910	AT1G32920		hypothetical protein
1911	AT1G32940	(SBT3.5)	Subtilase family protein
1912	AT1G32950		Subtilase family protein
1913	AT1G32960	(SBT3.3)	Subtilase family protein
1914	AT1G32970		Subtilisin-like serine endopeptidase family protein
1915	AT1G32980		Subtilisin-like serine endopeptidase family protein
1916	AT1G32990	PLASTID RIBOSOMAL PROTEIN L11 (PRPL11)	mutant has Decreased effective quantum yield of photosystem II; Pale green plants; Reduced growth rate; Plastid Ribosomal Protein L11 The mRNA is cell-to-cell mobile.
1917	AT1G33000		transposable_element_gene;similar to nucleic acid binding / ribonuclease H [Arabidopsis thaliana] (TAIR:AT4G08860.1);(source:TAIR10)
1918	AT1G33030		O-methyltransferase family protein
1919	AT1G33050		hypothetical protein
1920	AT1G33055	HYPOXIA RESPONSE UNKNOWN PROTEIN 32 (HUP32)	hypothetical protein
1921	AT1G33070		MADS-box family protein
1922	AT1G33080		MATE efflux family protein
1923	AT1G33090		MATE efflux family protein
1924	AT1G33110		MATE efflux family protein
1925	AT1G33130		transposable_element_gene;CACTA-like transposase family (Ptta/En/Spm), has a 1.3e-125 P-value blast match to At5g36655.1/81-333 CACTA-like transposase family (Ptta/En/Spm) (CACTA-element) (Arabidopsis thaliana);(source:TAIR10)
1926	AT1G33170		S-adenosyl-L-methionine-dependent methyltransferases superfamily protein
1927	AT1G33220		Glycosyl hydrolase superfamily protein
1928	AT1G33260		Protein kinase superfamily protein
1929	AT1G33265	FATTY ACID EXPORT 4 (FAX4)	Encodes a chloroplast membrane-localized fatty acid exporter that plays a critical roles in transporting plastid fatty acids for TAG biosynthesis during seed and embryo development.
1930	AT1G33270		Acyl transferase/acyl hydrolase/lysophospholipase superfamily protein
1931	AT1G33280	NAC DOMAIN CONTAINING PROTEIN 15 (NAC015)	NAC domain protein. SMB, BRN1, and BRN2 act to regulate root cap maturation, in a partially redundant fashion.BRN1 and BRN2, control the cell wall maturation processes that are required to detach root cap layers from the root.
1932	AT1G33320		Pyridoxal phosphate (PLP)-dependent transferases superfamily protein
1933	AT1G33340	(PICALM8)	ENTH/ANTH/VHS superfamily protein
1934	AT1G33350		Pentatricopeptide repeat (PPR) superfamily protein
1935	AT1G33410	SUPPRESSOR OF AUXIN RESISTANCE1 (SAR1)	Encodes a nucleoporin that regulates CONSTANS (CO) protein stability through affecting nuclear pore complex localization of an E3-ubiquitin ligase, HIGH EXPRESSION OF OSMOTICALLY RESPONSIVE GENES1 (HOS1), which destabilizes CO protein in the morning period.
1936	AT1G33440	NRT1/ PTR FAMILY 4.4 (NPF4.4)	Major facilitator superfamily protein
1937	AT1G33450		transposable_element_gene;similar to unknown protein [Arabidopsis thaliana] (TAIR:AT4G04780.2);(source:TAIR10)
1938	AT1G33460		transposable_element_gene;Mutator-like transposase family, has a 3.6e-40 P-value blast match to GB:AAA21566 mudrA of transposon=MuDR (MuDr-element) (Zea mays);(source:TAIR10)
1939	AT1G33470		RNA-binding (RRM/RBD/RNP motifs) family protein
1940	AT1G33480	ARABIDOPSIS T??XICOS EN LEVADURA 58 (ATL58)	RING/U-box superfamily protein
1941	AT1G33490		E3 ubiquitin-protein ligase
1942	AT1G33500		tropomyosin
1943	AT1G33540	SERINE CARBOXYPEPTIDASE-LIKE 18 (scpl18)	serine carboxypeptidase-like 18
1944	AT1G33560	ACTIVATED DISEASE RESISTANCE 1 (ADR1)	Encodes a NBS-LRR disease resistance protein that possesses N-terminal kinase subdomains. Activation tagged mutant of ADR1 showed elevated levels of SA and reactive oxygen species in addition to number of defense gene transcripts. Exhibits resistance to number of microbial pathogens.
1945	AT1G33580		transposable_element_gene;CACTA-like transposase family (Tnp2/En/Spm), has a 5.5e-96 P-value blast match to gb|AAG52024.1|AC022456_5 Tam1-homologous transposon protein TNP2, putative;(source:TAIR10)
1946	AT1G33590		Leucine-rich repeat (LRR) family protein
1947	AT1G33600		Leucine-rich repeat (LRR) family protein
1948	AT1G33610		Leucine-rich repeat (LRR) family protein
1949	AT1G33640		hypothetical protein
1950	AT1G33660		Pseudogene of AT1G33660; peroxidase family protein
1951	AT1G33680		KH domain-containing protein
1952	AT1G33690
1953	AT1G33700		Beta-glucosidase, GBA2 type family protein
1954	AT1G33710		RNA-directed DNA polymerase (reverse transcriptase)-related family protein
1955	AT1G33720	CYTOCHROME P450, FAMILY 76, SUBFAMILY C, POLYPEPTIDE 6 (CYP76C6)	cytochrome P450, family 76, subfamily C, polypeptide 6
1956	AT1G33750	TERPENE SYNTHASE 22 (TPS22)	Sesterterpene synthase which produces various sesterpne backbones bia type-A cyclization mechanism.
1957	AT1G33760	ETHYLENE RESPONSE FACTOR022 (ERF022)	encodes a member of the DREB subfamily A-4 of ERF/AP2 transcription factor family. The protein contains one AP2 domain. There are 17 members in this subfamily including TINY.
1958	AT1G33770		Protein kinase superfamily protein
1959	AT1G33790		jacalin lectin family protein
1960	AT1G33800	GLUCURONOXYLAN METHYLTRANSFERASE 1 (GXMT1)	Encodes a glucuronoxylan(GX)-speci&#64257;c 4-O-methyltransferase responsible for methylating GlcA residues in GX. Reduced methylation of GX ingxmt1-1 plants is correlated with altered lignin composition. The mRNA is cell-to-cell mobile.
1961	AT1G33811	(GGL7)	GDSL-motif esterase/acyltransferase/lipase. Enzyme group with broad substrate specificity that may catalyze acyltransfer or hydrolase reactions with lipid and non-lipid substrates.
1962	AT1G33813		transposable_element_gene;copia-like retrotransposon family, has a 5.8e-39 P-value blast match to gb|AAO73529.1| gag-pol polyprotein (Glycine max) (SIRE1) (Ty1_Copia-family);(source:TAIR10)
1963	AT1G33817		transposable_element_gene;copia-like retrotransposon family, has a 8.1e-100 P-value blast match to gb|AAO73521.1| gag-pol polyprotein (Glycine max) (SIRE1) (Ty1_Copia-family);(source:TAIR10)
1964	AT1G33820		hypothetical protein
1965	AT1G33830	IMMUNE ASSOCIATED NUCLEOTIDE BINDING 1 (IAN1)	P-loop containing nucleoside triphosphate hydrolases superfamily protein
1966	AT1G33840		LURP-one-like protein (DUF567)
1967	AT1G33850		Ribosomal protein S19 family protein
1968	AT1G33860		hypothetical protein
1969	AT1G33870		P-loop containing nucleoside triphosphate hydrolases superfamily protein
1970	AT1G33880	IMMUNE ASSOCIATED NUCLEOTIDE BINDING 2 (IAN2)	One of a cluster of paralogs (IAN2-6) that are associated with variation in heat tolerance.
1971	AT1G33890	IMMUNE ASSOCIATED NUCLEOTIDE BINDING 3 (IAN3)	One of a cluster of paralogs (IAN2-6) that are associated with variation in heat tolerance.
1972	AT1G33900	IMMUNE ASSOCIATED NUCLEOTIDE BINDING 4 (IAN4)	One of a cluster of paralogs (IAN2-6) that are associated with variation in heat tolerance.
1973	AT1G33910	IMMUNE ASSOCIATED NUCLEOTIDE BINDING 5 (IAN5)	One of a cluster of paralogs (IAN2-6) that are associated with variation in heat tolerance.
1974	AT1G33920	PHLOEM PROTEIN 2-A4 (PP2-A4)	phloem protein 2-A4
1975	AT1G33930	IMMUNE ASSOCIATED NUCLEOTIDE BINDING 6 (IAN6)	One of a cluster of paralogs (IAN2-6) that are associated with variation in heat tolerance.
1976	AT1G33940		Serine/Threonine-kinase ULK4-like protein
1977	AT1G33950	IMMUNE ASSOCIATED NUCLEOTIDE BINDING 7 (IAN7)	Avirulence induced gene (AIG1) family protein
1978	AT1G33960	AVRRPT2-INDUCED GENE 1 (AIG1)	Identified as a gene that is induced by avirulence gene avrRpt2 and RPS2 after infection with Pseudomonas syringae pv maculicola strain ES4326 carrying avrRpt2
1979	AT1G33970	IMMUNE ASSOCIATED NUCLEOTIDE BINDING 9 (IAN9)	IAN9 is a member of a small family of proteins. It's expression is repressed upon pathogen infection and loss of function mutants show increased resistance to bacterial pathogens.
1980	AT1G33980	(UPF3)	Involved in mRNA surveillance, detects exported mRNAs with truncated open reading frames and initiates nonsense-mediated mRNA decay (NMD). Regulates AT1G72910, AT1G72940, and ADR1-LIKE 2 in a temperature dependent manner.
1981	AT1G34000	ONE-HELIX PROTEIN 2 (OHP2)	Encodes a novel member of the Lhc family from Arabidopsis with one predicted transmembrane alpha-helix closely related to helix I of Lhc protein from PSI (Lhca4). Gene expression is triggered by light stress and both transcript and protein accumulate in a light intensity-dependent manner. Ohp2 is associated with PSI under low- or high-light conditions. Together with OHP1, OHP2 is essential for th…
1982	AT1G34010		hypothetical protein
1983	AT1G34040	TRYPTOPHAN AMINOTRANSFERASE RELATED 3 (TAR3)	Pyridoxal phosphate (PLP)-dependent transferases superfamily protein
1984	AT1G34065	S-ADENOSYLMETHIONINE CARRIER 2 (SAMC2)	S-adenosylmethionine carrier 2
1985	AT1G34070		Copia-like polyprotein/retrotransposon
1986	AT1G34080		transposable_element_gene;gypsy-like retrotransposon family, has a 4.0e-88 P-value blast match to GB:AAD19359 polyprotein (gypsy_Ty3-element) (Sorghum bicolor);(source:TAIR10)
1987	AT1G34090		transposable_element_gene;copia-like retrotransposon family, has a 8.8e-131 P-value blast match to GB:BAA78423 polyprotein (Ty1_Copia-element) (Arabidopsis thaliana)GB:BAA78423 polyprotein (Ty1_Copia-element) (Arabidopsis thaliana)GB:BAA78423 polyprotein (Ty1_Copia-element) (Arabidopsis thaliana)gi|4996361|dbj|BAA78423.1| polyprotein (Arabidopsis thaliana) (Ty1_Copia-element);(source:TAIR10)
1988	AT1G34100		pseudogene of Protein kinase superfamily protein
1989	AT1G34110	RGF1 INSENSITIVE 5 (RGI5)	Leucine-rich receptor-like protein kinase family protein
1990	AT1G34130	STAUROSPORIN AND TEMPERATURE SENSITIVE 3-LIKE B (STT3B)	Encodes homolog of yeast STT3, a subunit of oligosaccharyltransferase.
1991	AT1G34140	POLY(A) BINDING PROTEIN 1 (PAB1)	polyadenylate-binding protein, putative / PABP, putative, non-consensus splice donor TA at exon 1; similar to polyadenylate-binding protein (poly(A)-binding protein) from (Triticum aestivum) GI:1737492, (Nicotiana tabacum) GI:7673355, {Arabidopsis thaliana} SP:P42731; contains InterPro entry IPR000504: RNA-binding region RNP-1 (RNA recognition motif) (RRM). Only member of the class IV PABP family.
1992	AT1G34150		Pseudouridine synthase family protein
1993	AT1G34170	AUXIN RESPONSE FACTOR 13 (ARF13)	AUXIN RESPONSE FACTOR 13
1994	AT1G34180	NAC DOMAIN CONTAINING PROTEIN 16 (NAC016)	NAC domain containing protein 16
1995	AT1G34200		Glyceraldehyde-3-phosphate dehydrogenase-like family protein
1996	AT1G34240		transposable_element_gene;hAT-like transposase family (hobo/Ac/Tam3), has a 5.6e-48 P-value blast match to GB:AAD24567 transposase Tag2 (hAT-element) (Arabidopsis thaliana);(source:TAIR10)
1997	AT1G34245	EPIDERMAL PATTERNING FACTOR 2 (EPF2)	Encodes a secretory peptide EPF2 expressed in proliferating cells of the stomatal lineage, known as meristemoids, and in guard mother cells, the progenitors of stomata. Controls asymmetric cell divisions during stomatal development. EPF2 is related to EPF1, also involved in stomatal development. Its transcript levels change after inducing MUTE expression in a mute background. EPF2 binds to the ER…
1998	AT1G34260	FORMS APLOID AND BINUCLEATE CELLS 1A (FAB1D)	Encodes a protein that is predicted to act as a phosphatidylinositol-3P 5-kinase, but, because it lacks a FYVE domain, it is unlikely to be efficiently targeted to membranes containing the porposed phosphatidylinositol-3P substrate. Therefore, its molecular function remains unknown. The mRNA is cell-to-cell mobile.
[truncated: 15,061 more rows]

## Sheet: DEGs
	Additional file 1: Table S2. List of differentially expressed genes ((log2 FC ≥ 2.0 | log2 FC ≤ 2.0) and p-value < 0.05)
	Gene identifier	Gene symbol	Gene description
1	AT1G01090	PYRUVATE DEHYDROGENASE E1 ALPHA (PDH-E1 ALPHA)	pyruvate dehydrogenase E1 alpha subunit
2	AT1G01200	RAB GTPASE HOMOLOG A3 (RABA3)	RAB GTPase homolog A3
3	AT1G01250		encodes a member of the DREB subfamily A-4 of ERF/AP2 transcription factor family. The protein contains one AP2 domain. There are 17 members in this subfamily including TINY.
4	AT1G01470	LATE EMBRYOGENESIS ABUNDANT 14 (LEA14)	Encodes late-embryogenesis abundant protein whose mRNA levels are induced in response to wounding and light stress. Might be involved in protection against desiccation.
5	AT1G01520	ALTERED SEED GERMINATION 4 (ASG4)	RVE3 is one of eleven homologous MYB-like transcription factors in Arabidopsis and a member of the RVE8 clade. Plays a minor role in clock regulation.
6	AT1G01600	CYTOCHROME P450, FAMILY 86, SUBFAMILY A, POLYPEPTIDE 4 (CYP86A4)	Encodes a member of the CYP86A subfamily of cytochrome p450 genes. Expressed significantly at highest level in mature stems and flowers.
7	AT1G01620	PLASMA MEMBRANE INTRINSIC PROTEIN 1C (PIP1C)	a member of the plasma membrane intrinsic protein subfamily PIP1. localizes to the plasma membrane and exhibits water transport activity in Xenopus oocyte. expressed ubiquitously and protein level decreases slightly during leaf development. Involved redundantly with PIP1;1/2/4/5 in hydraulics and carbon fixation, regulates the expression of related genes that affect plant growth and development.
8	AT1G01700	ROP (RHO OF PLANTS) GUANINE NUCLEOTIDE EXCHANGE FACTOR 2 (ROPGEF2)	Encodes a member of KPP-like gene family, homolog of KPP (kinase partner protein) gene in tomato. Also a member of the RopGEF (guanine nucleotide exchange factor) family, containing the novel PRONE domain (plant-specific Rop nucleotide exchanger), which is exclusively active towards members of the Rop subfamily.
9	AT1G02310	ENDO-BETA-MANNANASE 1 (MAN1)	Glycosyl hydrolase superfamily protein
10	AT1G02340	LONG HYPOCOTYL IN FAR-RED (HFR1)	Encodes a light-inducible, nuclear bHLH protein involved in phytochrome signaling. Mutants exhibit a long-hypocotyl phenotype only under far-red light but not under red light and are defective in other phytochrome A-related responses. Mutants also show blue light response defects. HFR1 interacts with COP1, co-localizes to the nuclear specks and is ubiquinated by COP1.
11	AT1G02390	GLYCEROL-3-PHOSPHATE SN-2-ACYLTRANSFERASE 2 (GPAT2)	putative sn-glycerol-3-phosphate 2-O-acyltransferase
12	AT1G02530	ATP-BINDING CASSETTE B12 (ABCB12)	P-glycoprotein 12
13	AT1G02720	GALACTURONOSYLTRANSFERASE-LIKE 5 (GATL5)	Encodes a protein with putative galacturonosyltransferase activity.
14	AT1G02790	POLYGALACTURONASE 4 (PGA4)	encodes a exopolygalacturonase.
15	AT1G02820	LATE EMBRYOGENESIS ABUNDANT 3 (LEA3)	Late embryogenesis abundant 3 (LEA3) family protein
16	AT1G02850	BETA GLUCOSIDASE 11 (BGLU11)	beta glucosidase 11
17	AT1G02900	RAPID ALKALINIZATION FACTOR 1 (RALF1)	Member of a diversely expressed predicted peptide family showing sequence similarity to tobacco Rapid Alkalinization Factor (RALF), and is believed to play an essential role in the physiology of Arabidopsis. Consists of a single exon and is characterized by a conserved C-terminal motif and N-terminal signal peptide. Mediates Ca2+-dependent signaling. Regulates the splicing of flowering genes and …
18	AT1G03010		Phototropic-responsive NPH3 family protein
19	AT1G03020	(GRXS1)	Encodes a member of the CC-type glutaredoxin (ROXY) family that has been shown to interact with the transcription factor TGA2.
20	AT1G03055	DWARF27 (D27)	Encodes the ortholog of rice D27. It is plastid-localized and is required for the inhibition of secondary bud outgrowth and operates on a nonmobile precursor upstream of MAX1 in the SL biosynthesis pathway.
21	AT1G03130	PHOTOSYSTEM I SUBUNIT D-2 (PSAD-2)	Encodes a protein predicted by sequence similarity with spinach PsaD to be photosystem I reaction center subunit II (PsaD2)
22	AT1G03550	SECRETORY CARRIER MEMBRANE PROTEIN 4 (SCAMP4)	Secretory carrier membrane protein (SCAMP) family protein
23	AT1G03600	(PSB27)	PSB27 is a chloroplast lumen localized protein that is involved in adaptation to changes in light intensity.
24	AT1G03620	(ELMOD_F)	Member of the ELMOD family.
25	AT1G03700	CASP-LIKE PROTEIN 1C2 (CASPL1C2)	Uncharacterized protein family (UPF0497)
26	AT1G03790	SOMNUS (SOM)	Encodes SOMNUS (SOM), a nucleus-localized CCCH-type zinc finger protein. SOM negatively regulates light-dependent seed germination downstream of PIL5 (AT2G20180).
27	AT1G03850	GLUTAREDOXIN 13 (GRXS13)	Encodes glutaredoxin ATGRXS13, required to facilitate Botrytis cinerea infection of Arabidopsis thaliana plants. Sylvain La Camera et al (2011, PMID:21756272) reported a third splice variant in addition to the two annotated in TAIR10. It is a member of the CC-type glutaredoxin (ROXY) family that has been shown to interact with the transcription factor TGA2 and suppress ORA59 promoter activity.
28	AT1G03870	FASCICLIN-LIKE ARABINOOGALACTAN 9 (FLA9)	fasciclin-like arabinogalactan-protein 9 (Fla9). Possibly involved in embryogenesis and seed development.
29	AT1G04040		HAD superfamily, subfamily IIIB acid phosphatase
30	AT1G04240	SHORT HYPOCOTYL 2 (SHY2)	SHY2/IAA3 regulates multiple auxin responses in roots. It is induced rapidly by IAA, and has been shown to be phosphorylated by oat phytochrome A in vitro.
31	AT1G04350		encodes a protein whose sequence is similar to 2-oxoglutarate-dependent dioxygenase
32	AT1G04470		hypothetical protein (DUF810)
33	AT1G05160	CYTOCHROME P450, FAMILY 88, SUBFAMILY A, POLYPEPTIDE 3 (CYP88A3)	Encodes an ent-kaurenoic acid hydroxylase, a member of the CYP88A cytochrome p450 family.
34	AT1G05190	EMBRYO DEFECTIVE 2394 (emb2394)	Encodes the plastid 50S ribosomal protein L6.
35	AT1G05280		ERV-F (C)1 provirus ancestral Env polyprotein, putative (DUF604)
36	AT1G05440		C-8 sterol isomerase
37	AT1G05460	SILENCING DEFECTIVE (SDE3)	Encodes a protein with similarity to RNA helicases. Mutants are defective in post-transcriptional gene silencing.
38	AT1G05480
39	AT1G05580	CATION/H+ EXCHANGER 23 (CHX23)	member of Putative Na+/H+ antiporter family
40	AT1G05680	URIDINE DIPHOSPHATE GLYCOSYLTRANSFERASE 74E2 (UGT74E2)	Encodes a UDP-glucosyltransferase, UGT74E2, that acts on IBA (indole-3-butyric acid) and affects auxin homeostasis. The transcript and protein levels of this enzyme are strongly induced by H2O2 and may allow integration of ROS (reactive oxygen species) and auxin signaling. This enzyme can also transfer glycosyl groups to several compounds related to the explosive TNT when this synthetic compound …
41	AT1G05990	ROOT HAIR SPECIFIC 2 (RHS2)	EF hand calcium-binding protein family
42	AT1G06140	MITOCHONDRIAL EDITING FACTOR 3 (MEF3)	Encodes MEF3 (mitochondrial editing factor 3), a PPR (pentatricopeptide repeat) protein of the E domain subclass. Functions in mitochondrial RNA editing.
43	AT1G06420		DNA ligase-like protein
44	AT1G06520	GLYCEROL-3-PHOSPHATE SN-2-ACYLTRANSFERASE 1 (GPAT1)	sn-glycerol-3-phosphate 2-O-acyltransferase. Expressed in flower buds and siliques. Homozygous mutant plants are male sterile.
45	AT1G06620		encodes a protein whose sequence is similar to a 2-oxoglutarate-dependent dioxygenase The mRNA is cell-to-cell mobile.
46	AT1G06640		encodes a protein whose sequence is similar to a 2-oxoglutarate-dependent dioxygenase The mRNA is cell-to-cell mobile.
47	AT1G06680	PHOTOSYSTEM II SUBUNIT P-1 (PSBP-1)	Encodes a 23 kD extrinsic protein that is part of photosystem II and participates in the regulation of oxygen evolution. Phosphorylation of this protein is dependent on calcium. In plsp1-1 mutant plastids, the nonmature form of the protein localizes in the stroma. The mRNA is cell-to-cell mobile.
48	AT1G06980		PADRE protein
49	AT1G06990		GDSL-motif esterase/acyltransferase/lipase. Enzyme group with broad substrate specificity that may catalyze acyltransfer or hydrolase reactions with lipid and non-lipid substrates.
50	AT1G07160		Protein phosphatase 2C family protein
51	AT1G07290	GOLGI NUCLEOTIDE SUGAR TRANSPORTER 2 (GONST2)	Encodes a GDP-mannose transporter.
52	AT1G07320	RIBOSOMAL PROTEIN L4 (RPL4)	encodes a plastid ribosomal protein L4
53	AT1G07340	SUGAR TRANSPORTER 2 (STP2)	sugar transporter 2
54	AT1G07390	RECEPTOR LIKE PROTEIN 1 (RLP1)	receptor like protein 1
55	AT1G07430	HIGHLY ABA-INDUCED PP2C GENE 2 (HAI2)	Encodes a member of the group A protein phosphatase 2C (PP2C) family that is responsible for negatively regulating seed dormancy.
56	AT1G07450		NAD(P)-binding Rossmann-fold superfamily protein
57	AT1G07500	SIAMESE-RELATED 5 (SMR5)	SMR5 is a member of the SIAMESE-RELATED Cyclin-Dependent Kinase Inhibitor family. It is induced by ROS/oxidative stress.
58	AT1G07610	METALLOTHIONEIN 1C (MT1C)	one of the five metallothioneins (MTs) genes identified in Arabidopsis. MTs are cysteine-rich proteins required for heavy metal tolerance. The mRNA is cell-to-cell mobile.
59	AT1G07880	(ATMPK13)	member of MAP Kinase
60	AT1G08380	PHOTOSYSTEM I SUBUNIT O (PSAO)	Encodes subunit O of photosystem I.
61	AT1G08860	BONZAI 3 (BON3)	Encodes a copine-like protein, which is a member of a newly identified class of calcium-dependent, phospholipid binding proteins that are present in a wide range of organisms. Overexpression of this gene suppresses bon1-1 phenotypes. Double mutant analyses with bon1-1 suggest that BON1 and BON3 have overlapping functions in maintaining cellular homeostasis and inhibiting cell death.
62	AT1G08920	ERD (EARLY RESPONSE TO DEHYDRATION) SIX-LIKE 1 (ESL1)	Encodes ESL1, a transporter for monosaccharides.
63	AT1G08930	EARLY RESPONSE TO DEHYDRATION 6 (ERD6)	encodes a putative sucrose transporter whose gene expression is induced by dehydration and cold. The mRNA is cell-to-cell mobile.
64	AT1G09090	RESPIRATORY BURST OXIDASE HOMOLOG B (RBOHB)	NADPH-oxidase AtrbohB plays a role in seed after-ripening. Major producer of superoxide in germinating seeds. AtrbohB pre-mRNA is alternatively spliced in seeds in a hormonally and developmentally regulated manner. ABA caused accumulation of AtrbohB-? mRNA and prevented prevented AtrbohB-a mRNA expression in fresh seeds.
65	AT1G09155	PHLOEM PROTEIN 2-B15 (PP2-B15)	phloem protein 2-B15
66	AT1G09300	(ATICP55)	Encodes a mitochondrial protease ICP55. Alters the stability of proteins by removal of a single amino acid from their sequence.
67	AT1G09340	CHLOROPLAST RNA BINDING (CRB)	Encodes CHLOROPLAST RNA BINDING (CRB), a putative RNA-binding protein. CRB is important for the proper functioning of the chloroplast. Mutations in CRB also affects the circadian system, altering the expression of both oscillator and output genes. The mRNA is cell-to-cell mobile.
68	AT1G09390		GDSL-motif esterase/acyltransferase/lipase. Enzyme group with broad substrate specificity that may catalyze acyltransfer or hydrolase reactions with lipid and non-lipid substrates.
69	AT1G09440		Protein kinase superfamily protein
70	AT1G09560	GERMIN-LIKE PROTEIN 5 (GLP5)	Encodes a plasodesmata-located protein involved in regulating primary root growth by controlling phloem-mediated allocation of resources between the primary and lateral root meristems. The mRNA is cell-to-cell mobile.
71	AT1G09570	PHYTOCHROME A (PHYA)	Light-labile cytoplasmic red/far-red light photoreceptor involved in the regulation of photomorphogenesis. It exists in two inter-convertible forms: Pr and Pfr (active) and functions as a dimer.The N terminus carries a single tetrapyrrole chromophore, and the C terminus is involved in dimerization. It is the sole photoreceptor mediating the FR high irradiance response (HIR). Major regulator in re…
72	AT1G09750		Eukaryotic aspartyl protease family protein
73	AT1G09780	2,3-BIPHOSPHOGLYCERATE-INDEPENDENT PHOSPHOGLYCERATE MUTASE 1 (iPGAM1)	Encodes a 2,3-biphosphoglycerate-independent phosphoglycerate mutase that is involved in pollen development and stomatal movement.
74	AT1G09950	RESPONSE TO ABA AND SALT 1 (RAS1)	RESPONSE TO ABA AND SALT 1
75	AT1G10020		formin-like protein (DUF1005)
76	AT1G10140		Uncharacterized conserved protein UCP031279
77	AT1G10150		Carbohydrate-binding protein
78	AT1G10170	NF-X-LIKE 1 (NFXL1)	Encodes AtNFXL1, a homologue of the putative human transcription repressor NF-X1. Functions as a negative regulator of the trichothecene phytotoxin-induced defense response.
79	AT1G10270	GLUTAMINE-RICH PROTEIN 23 (GRP23)	glutamine-rich protein 23
80	AT1G10360	GLUTATHIONE S-TRANSFERASE TAU 18 (GSTU18)	Encodes glutathione transferase belonging to the tau class of GSTs. Naming convention according to Wagner et al. (2002).
81	AT1G10370	EARLY-RESPONSIVE TO DEHYDRATION 9 (ERD9)	Encodes GSTU17 (Glutathione S-Transferase U17). Functions as a negative component of stress-mediated signal transduction pathways in drought and salt stress responses.
82	AT1G10380		Putative membrane lipoprotein
83	AT1G10470	RESPONSE REGULATOR 4 (ARR4)	Encodes a two-component response regulator. Acts redundantly with ARR3 in the control of circadian period in a cytokinin-independent manner.
84	AT1G10530		PADRE protein
85	AT1G10960	FERREDOXIN 1 (FD1)	Phosphatidylinositol 4-phosphate 5-kinase (PIP5K) enzyme family member.
86	AT1G11000	MILDEW RESISTANCE LOCUS O 4 (MLO4)	A member of a large family of seven-transmembrane domain proteins specific to plants, homologs of the barley mildew resistance locus o (MLO) protein. The Arabidopsis genome contains 15 genes encoding MLO proteins, with localization in plasma membrane. Phylogenetic analysis revealed four clades of closely-related AtMLO genes. ATMLO4 belongs to the clade I, with AtMLO11 and AtMLO14. The gene is exp…
87	AT1G11080	SERINE CARBOXYPEPTIDASE-LIKE 31 (scpl31)	serine carboxypeptidase-like 31
88	AT1G11190	BIFUNCTIONAL NUCLEASE I (BFN1)	Encodes a bifunctional nuclease that acts on both RNA and DNA involved in nucleic acid degradation to facilitate nucleotide and phosphate recovery during senescence. It has mismatch-specific endonuclease activity with wide recognition of single base mismatches as well as the ability to cleave indel types of mismatches (heteroduplexes with loops).
89	AT1G11440		hypothetical protein
90	AT1G11600	CYTOCHROME P450, FAMILY 77, SUBFAMILY B, POLYPEPTIDE 1 (CYP77B1)	Plant specific fatty acid epoxygenase.
91	AT1G11970		Ubiquitin-like superfamily protein
92	AT1G12030		phosphoenolpyruvate carboxylase, putative (DUF506)
93	AT1G12090	EXTENSIN-LIKE PROTEIN (ELP)	extensin-like protein (ELP)
94	AT1G12130	(FMOGS-OX6)	Encodes a flavin-containing monooxygenases involved in biosynthesis of aliphatic glucosinolates.
95	AT1G12160	(FMOGS-OX7)	Encodes a flavin-containing monooxygenases involved in biosynthesis of aliphatic glucosinolates.
96	AT1G12200	FLAVIN MONOOXYGENASE (FMO)	Putative flavin monooxygenase.
97	AT1G12250	(TL20.3)	Pentapeptide repeat-containing protein
98	AT1G12330		cyclin-dependent kinase-like protein
99	AT1G12740	CYTOCHROME P450, FAMILY 87, SUBFAMILY A, POLYPEPTIDE 2 (CYP87A2)	encodes a protein with cytochrome P450 domain
100	AT1G12845		transmembrane protein
101	AT1G12900	GLYCERALDEHYDE 3-PHOSPHATE DEHYDROGENASE A SUBUNIT 2 (GAPA-2)	glyceraldehyde 3-phosphate dehydrogenase A subunit 2
102	AT1G12940	NITRATE TRANSPORTER2.5 (NRT2.5)	member of High affinity nitrate transporter family
103	AT1G12950	ROOT HAIR SPECIFIC 2 (RHS2)	root hair specific 2
104	AT1G13590	PHYTOSULFOKINE 1 PRECURSOR (PSK1)	Encodes a phytosulfokine-alpha (PSK) precursor, a unique plant peptide growth factor first described in Asparagus.
105	AT1G13610		alpha/beta-Hydrolases superfamily protein
106	AT1G13700	6-PHOSPHOGLUCONOLACTONASE 1 (PGL1)	Encodes a cytosolic 6-phosphogluconolactonase (PGL) thought to be involved in the oxidative pentose-phosphate pathway (OPPP).
107	AT1G13710	CYTOCHROME P450, FAMILY 78, SUBFAMILY A, POLYPEPTIDE 5 (CYP78A5)	Encodes the cytochrome P450 CYP78A5 monooxygenase. Contributes to the generation of a growth-stimulating signal distinct from the classical phytohormones that prevents proliferation arrest, promoting organ growth. In ovules it is required for megagametogenesis, maternal control of seed size and restricting megaspore mother cell fate to a single cell.
108	AT1G13920		Remorin family protein
109	AT1G14080	FUCOSYLTRANSFERASE 6 (FUT6)	Encodes an alpha-(1,2)-fucosyltransferase.
110	AT1G14190		Glucose-methanol-choline (GMC) oxidoreductase family protein
111	AT1G14345		NAD(P)-linked oxidoreductase superfamily protein
112	AT1G14370	PROTEIN KINASE 2A (APK2A)	Encodes protein kinase APK2a. Protein is N-myristoylated.
113	AT1G14390		Leucine-rich repeat protein kinase family protein
114	AT1G14620	DECOY (DECOY)	decoy
115	AT1G14687	HOMEOBOX PROTEIN 32 (HB32)	homeobox protein 32
116	AT1G14700	PURPLE ACID PHOSPHATASE 3 (PAP3)	purple acid phosphatase 3
117	AT1G14720	XYLOGLUCAN ENDOTRANSGLUCOSYLASE/HYDROLASE 28 (XTH28)	member of Glycoside Hydrolase Family 16
118	AT1G14780		MAC/Perforin domain-containing protein
119	AT1G14840	MICROTUBULE-ASSOCIATED PROTEINS 70-4 (MAP70-4)	Encodes a microtubule associated protein (MAP70-4). Expressed in all tissues.
120	AT1G14940		Polyketide cyclase/dehydrase and lipid transport superfamily protein
121	AT1G15010		mediator of RNA polymerase II transcription subunit
122	AT1G15180		MATE efflux family protein
123	AT1G15210	ATP-BINDING CASSETTE G35 (ABCG35)	pleiotropic drug resistance 7
124	AT1G15290	REDUCED CHLOROPLAST COVERAGE 3 (REC3)	Encodes REDUCED CHLOROPLAST COVERAGE 3 (REC3). Contributes to establishing the size of the chloroplast compartment.
125	AT1G15340	METHYL-CPG-BINDING DOMAIN 10 (MBD10)	Protein containing methyl-CpG-binding domain.Has sequence similarity to human MBD proteins.
126	AT1G15440	PERIODIC TRYPTOPHAN PROTEIN 2 (PWP2)	Encodes a nucleolar protein that is a ribosome biogenesis co-factor. Mutants display aberrant RNA processing and female gametophyte development.
127	AT1G15550	GIBBERELLIN 3-OXIDASE 1 (GA3OX1)	Involved in later steps of the gibberellic acid biosynthetic pathway. Activated by AGAMOUS in a cal-1, ap1-1 background. Deletion of 208 bp from -1016 to -809 (&#916;-808) resulted in loss of GA-negative feedback (this sequence, which contains a 43-bp sequence GNFEI, was shown to be sufficient for GA-negative feedback).
128	AT1G15580	INDOLE-3-ACETIC ACID INDUCIBLE 5 (IAA5)	auxin induced protein
129	AT1G15590		E3 ubiquitin-protein ligase
130	AT1G15670	KISS ME DEADLY 2 (KMD2)	Encodes a member of a family of F-box proteins, called the KISS ME DEADLY (KMD) family, that targets type-B ARR proteins for degradation and is involved in the negative regulation of the cytokinin response. Also named as KFB1, a member of a group of Kelch repeat F-box proteins that negatively regulate phenylpropanoid biosynthesis by targeting the phenypropanoid biosynthesis enzyme phenylalanine a…
131	AT1G15790		mediator of RNA polymerase II transcription subunit 15a-like protein
132	AT1G15820	LIGHT HARVESTING COMPLEX PHOTOSYSTEM II SUBUNIT 6 (LHCB6)	Lhcb6 protein (Lhcb6), light harvesting complex of photosystem II.
133	AT1G15870		Mitochondrial glycoprotein family protein
134	AT1G16000	OUTER ENVELOPE PROTEIN 9.1 (OEP9.1)	Member of the Arabidopsis 7-kDa OEP family. Tail-anchored (TA) membrane protein which possesses a single C-terminal transmembrane domain targeting post-translationally to plastids.
135	AT1G16160	WALL ASSOCIATED KINASE-LIKE 5 (WAKL5)	WAK-like kinase The mRNA is cell-to-cell mobile.
136	AT1G16310	METAL-TOLERANCE PROTEIN 10 (MTP10)	Cation efflux family protein which affects ABA-JA crosstalk and susceptibility to Mamestra brassicae herbivory.
137	AT1G16410	CYTOCHROME P450 79F1 (CYP79F1)	member of CYP79F The mRNA is cell-to-cell mobile.
138	AT1G16490	MYB DOMAIN PROTEIN 58 (MYB58)	Member of the R2R3 factor gene family.
139	AT1G16510	SMALL AUXIN UPREGULATED 41 (SAUR41)	Encodes a clade III SAUR gene with a distinctive expression pattern in root meristems. It is normally expressed in the quiescent center and cortex/endodermis initials and upon auxin stimulation, the expression is found in the endodermal layer. Overexpression studies suggest roles in cell expansion and auxin transport.
140	AT1G16830		Pentatricopeptide repeat (PPR) superfamily protein
141	AT1G17010		2-oxoglutarate (2OG) and Fe(II)-dependent oxygenase superfamily protein
142	AT1G17020	SENESCENCE-RELATED GENE 1 (SRG1)	Encodes a novel member of the Fe(II)/ascorbate oxidase gene family; senescence-related gene.
143	AT1G17060	CYTOCHROME P450 72C1 (CYP72C1)	Encodes a protein with similarity to other cytochrome P450's and is a homolog of BAS1. Over expression causes a dwarf phenotype resembling brassinolide resistant mutants. Double mutant analysis of sob7/bas1 loss of function mutants suggests these genes have redundant functions in light responsiveness. SOB7 may function in metabolizing brassinolides. Expressed in leaf, root, stem and silique but e…
144	AT1G17170	GLUTATHIONE S-TRANSFERASE TAU 24 (GSTU24)	Encodes glutathione transferase belonging to the tau class of GSTs. Naming convention according to Wagner et al. (2002). It is involved in the detoxification of the environmental pollutant 2,4,6-trinitrotoluene. Arabidopsis plants over-expressing At1g17170 were more resistant to TNT, removed more TNT from sterile and soil-based media, and had reduced levels of glutathione when grown in the presen…
145	AT1G17180	GLUTATHIONE S-TRANSFERASE TAU 25 (GSTU25)	Encodes glutathione transferase belonging to the tau class of GSTs. Naming convention according to Wagner et al. (2002). Detoxification of the environmental pollutant 2,4,6-trinitrotoluene. Arabidopsis plant over-expressing At1g17180 were more resistant to TNT, removed more TNT from sterile and soil-based media, and had reduced levels of glutathione when grown in the presence of TNT.
146	AT1G17190	GLUTATHIONE S-TRANSFERASE TAU 26 (GSTU26)	Encodes glutathione transferase belonging to the tau class of GSTs. Naming convention according to Wagner et al. (2002).
147	AT1G17200	CASP-LIKE PROTEIN 2A1 (CASPL2A1)	Uncharacterized protein family (UPF0497)
148	AT1G17290	ALANINE AMINOTRANSFERASE (AlaAT1)	Encodes for alanine aminotransferase (ALAAT1), involved in alanine catabolism during plants recovery from hypoxia The mRNA is cell-to-cell mobile.
149	AT1G17545		Protein phosphatase 2C family protein
150	AT1G17560	HUELLENLOS (HLL)	Encodes HUELLENLOS (HLL), a mitochondrial ribosome protein, similar to L14 ribosomal protein of eubacteria. HLL is essential for normal ovule development.
151	AT1G17710	PHOSPHOETHANOLAMINE/PHOSPHOCHOLINE PHOSPHATASE 1 (PEPC1)	Encodes a phosphoethanolamine/phosphocholine phosphatase. It is likely to be involved in the liberation of inorganic phosphate from intracellular sources. Expression is upregulated in the shoot of cax1/cax3 mutant.
152	AT1G17740
153	AT1G17860	ARABIDOPSIS THALIANA KUNITZ TRYPSIN INHIBITOR 5 (ATKTI5)	Member of Kunitz trypsin inhibitor (KTI) family involved in plant defense response against spider mites.
154	AT1G18180		3-oxo-5-alpha-steroid 4-dehydrogenase (DUF1295)
155	AT1G18320	(ATTIM22)	Mitochondrial import inner membrane translocase subunit Tim17/Tim22/Tim23 family protein
156	AT1G18500	METHYLTHIOALKYLMALATE SYNTHASE-LIKE 4 (MAML-4)	Encodes an active Arabidopsis isopropylmalate synthase IPMS1. Involved in leucine biosynthesis. Do not participate in the chain elongation of glucosinolates. Expressed constitutively throughout the plant. Loss of IPMS1 can be compensated by a second isopropylmalate synthase gene IPMS2 (At1g74040). The mRNA is cell-to-cell mobile.
157	AT1G18730	PHOTOSYNTHETIC NDH SUBCOMPLEX B 4 (PnsB4)	likely a subunit of the chloroplast NAD(P)H dehydrogenase complex, involved in PSI cyclic electron transport. Located on the thylakoid membrane. Mutant has impaired NAD(P)H dehydrogenase activity. The mRNA is cell-to-cell mobile.
158	AT1G18810		phytochrome kinase substrate-like protein
159	AT1G18850	LANT-SPECIFIC COMPONENT OF THE PRE- RRNA PROCESSING COMPLEX2 (PCP2)	PCP2 encodes a novel plant specific protein that is co-expressed with components of pre-rRNA processing complex. Co-localizes with NuGWD1 and SWA1.
160	AT1G18980		RmlC-like cupins superfamily protein
161	AT1G19330	SAP30 FUNCTION-RELATED 2 (AFR2)	Evening-expressed key component of Sin3-HDAC complex, which bind directly to the CIRCADIAN CLOCK ASSOCIATED 1 (CCA1) and PSEUDO-RESPONSE REGULATOR 9 (PRR9) promoters and catalyze histone 3 (H3) deacetylation at the cognate regions to repress expression, allowing the declining phase of their expression at dusk.
162	AT1G19540		NmrA-like negative transcriptional regulator family protein
163	AT1G19630	CYTOCHROME P450, FAMILY 722, SUBFAMILY A, POLYPEPTIDE 1 (CYP722A1)	cytochrome P450, family 722, subfamily A, polypeptide 1
164	AT1G19700	BEL1-LIKE HOMEODOMAIN 10 (BEL10)	Encodes a member of the BEL family of homeodomain proteins. Its interaction with PLP (PAS/LOV PROTEIN) is diminished by blue light.
165	AT1G19970		ER lumen protein retaining receptor family protein
166	AT1G20020	FERREDOXIN-NADP(+)-OXIDOREDUCTASE 2 (FNR2)	Encodes a leaf-type ferredoxin:NADP(H) oxidoreductase. It is present in both chloroplast stroma and thylakoid membranes but is more abundant in the stroma The mRNA is cell-to-cell mobile.
167	AT1G20070		hypothetical protein
168	AT1G20510	OPC-8:0 COA LIGASE1 (OPCL1)	OPC-8:0 CoA ligase1
169	AT1G20823	(ATATL80)	Encodes a RING E3 ubiquitin ligase ATL80. Involved in phosphate mobilization and cold stress response in sufficient phosphate growth conditions. The mRNA is cell-to-cell mobile.
170	AT1G20850	XYLEM CYSTEINE PEPTIDASE 2 (XCP2)	Cysteine peptidase. Enzyme activity detected in leaf.
171	AT1G21000	(PLATZ1)	PLATZ transcription factor family protein
172	AT1G21360	GLYCOLIPID TRANSFER PROTEIN 2 (GLTP2)	glycolipid transfer protein 2
173	AT1G21400	(E1A1)	Branched chain alpha-keto acid dehydrogenase E1 alpha.
174	AT1G21440		Phosphoenolpyruvate carboxylase family protein
175	AT1G21500		hypothetical protein
176	AT1G21530		AMP-dependent synthetase and ligase family protein
177	AT1G21870	GOLGI NUCLEOTIDE SUGAR TRANSPORTER 5 (GONST5)	Encodes a Golgi-localized nucleotide-sugar transporter.
178	AT1G21910	DEHYDRATION RESPONSE ELEMENT-BINDING PROTEIN 26 (DREB26)	encodes a member of the DREB subfamily A-5 of ERF/AP2 transcription factor family. The protein contains one AP2 domain. There are 15 members in this subfamily including RAP2.1, RAP2.9 and RAP2.10.
179	AT1G22360	UDP-GLUCOSYL TRANSFERASE 85A2 (UGT85A2)	UDP-glucosyl transferase 85A2
180	AT1G22400	(UGT85A1)	UDP-Glycosyltransferase superfamily protein
181	AT1G22500	ARABIDOPSIS TOXICOS EN LEVADURA 15 (ATL15)	Gene encodes a putative C3HC4-type RING zinc finger factor. it is induced in response to light and ascorbate stimulus.
182	AT1G22570		Major facilitator superfamily protein
183	AT1G22590	AGAMOUS-LIKE 87 (AGL87)	AGAMOUS-like 87
184	AT1G22600		Late embryogenesis abundant protein (LEA) family protein
185	AT1G22710	SUCROSE-PROTON SYMPORTER 2 (SUC2)	Encodes for a high-affinity transporter essential for phloem loading and long-distance transport. A major sucrose transporter, AtSUC2 can also transport a wide range of physiological and synthetic glucose conjugates with both &#945;- or &#946;-linkage.
186	AT1G22890	(STMP2)	Secreted peptide which functions in plant growth and pathogen defense.
187	AT1G22980		Grap2/cyclin-D-interacting protein
188	AT1G22990	HEAVY METAL ASSOCIATED ISOPRENYLATED PLANT PROTEIN 22 (HIPP22)	Heavy metal transport/detoxification superfamily protein
189	AT1G23020	FERRIC REDUCTION OXIDASE 3 (FRO3)	Encodes a ferric chelate reductase whose transcription is regulated by FIT1. Expressed in the root, shoot, flower and cotyledon.
190	AT1G23040		hydroxyproline-rich glycoprotein family protein
191	AT1G23100		GroES-like family protein
192	AT1G23120		Polyketide cyclase/dehydrase and lipid transport superfamily protein
193	AT1G23130		Polyketide cyclase/dehydrase and lipid transport superfamily protein
194	AT1G23210	GLYCOSYL HYDROLASE 9B6 (GH9B6)	glycosyl hydrolase 9B6
195	AT1G23480	CELLULOSE SYNTHASE-LIKE A3 (CSLA03)	encodes a gene similar to cellulose synthase
196	AT1G23510		OBP32pep protein
197	AT1G23520		hypothetical protein (DUF220)
198	AT1G23580		transmembrane protein, putative (Domain of unknown function DUF220)
199	AT1G23590		OBP32pep protein, putative (Domain of unknown function DUF220)
200	AT1G23630
201	AT1G23690		hypothetical protein (Domain of unknown function DUF220)
202	AT1G23740	ALKENAL/ONE OXIDOREDUCTASE (AOR)	AOR is an alkenal/one oxidoreductase that acts on compounds with unsaturated alpha,beta-carbonyls. The activity of this enzyme with a number of substrates, including acrolein and 3-buten-2-one, was demonstrated in vitro using a truncated form of the protein that lacked approximately 80 of the first amino acids. This protein appears to localize to the chloroplast where it likely helps to maintain …
203	AT1G23760	(JP630)	Encodes aromatic rich glycoprotein JP630.
204	AT1G24030	PBS1-LIKE 28 (PBL28)	Protein kinase superfamily protein
205	AT1G24090	(RNH1C)	RNase H family protein
206	AT1G24470	BETA-KETOACYL REDUCTASE 2 (KCR2)	Encodes one of the two Arabidopsis homologues to YBR159w encoding a S. cerevisiae beta-ketoacyl reductase (KCR), which catalyzes the first reduction during VLCFA (very long chain fatty acids, >18 carbon) elongation: KCR1 (At1g67730), KCR2 (At1g24470). Complementation of the yeast ybr159Delta mutant demonstrated that the two KCR proteins are divergent and that only AtKCR1 can restore heterologous …
207	AT1G25230		Calcineurin-like metallo-phosphoesterase superfamily protein
208	AT1G25330	CESTA (CES)	Encodes CESTA, a positive regulator of brassinosteroid biosynthesis.
209	AT1G25560	TEMPRANILLO 1 (TEM1)	Encodes a member of the RAV transcription factor family that contains AP2 and B3 binding domains. Involved in the regulation of flowering under long days. Loss of function results in early flowering. Overexpression causes late flowering and repression of expression of FT. Novel transcriptional regulator involved in ethylene signaling. Promoter bound by EIN3. EDF1 in turn, binds to promoter elemen…
210	AT1G26340	CYTOCHROME B5 ISOFORM A (CB5-A)	encodes a member of the cytochromes b5 family of proteins that localizes to the outer envelope of the chloroplast. The C-terminal portion of the protein appears to be capable of inserting into a plant microsomal membrane in vitro.
211	AT1G26530		PIN domain-like family protein
212	AT1G26680		transcriptional factor B3 family protein
213	AT1G26730		EXS (ERD1/XPR1/SYG1) family protein
214	AT1G26740		Ribosomal L32p protein family
215	AT1G26770	EXPANSIN A10 (EXPA10)	Encodes an expansin. Naming convention from the Expansin Working Group (Kende et al, Plant Mol Bio). Involved in the formation of nematode-induced syncytia in roots of Arabidopsis thaliana.
216	AT1G26870	FEZ (FEZ)	NAC-domain protein. Expressed in root cap stem cells, where it promotes periclinal root cap-forming divisions. Involved in a regulatory feedback loop with SMB. FEZ activates SMB in hte root cap daughter cells soon after division, and SMB in turn represses FEZ expression in these cells, thereby preventing further stem cell divisions.
217	AT1G27030		hypothetical protein
218	AT1G27120	(GALT4)	Encodes a Golgi-localized hydroxyproline-O-galactosyltransferase.
219	AT1G27480		alpha/beta-Hydrolases superfamily protein
220	AT1G27650	(ATU2AF35A)	U2 auxiliary factor small subunit. The atU2AF35a protein and its homolog, atU2AF35b, contain most of the conserved domains of hsU2AF35, including the psiRRM, one RS domain, two zinc fingers, and the two regions for interacting with U2AF large subunit. Both proteins lack the stretch of glycines present in human U2AF35. The sequences are overall 83% identical, and each Arabidopsis homolog shows app…
221	AT1G27740	ROOT HAIR DEFECTIVE 6-LIKE 4 (RSL4)	Basic helix-loop-helix (bHLH) transcription factor that is sufficient to promote postmitotic cell growth in root-hair cells. RSL4 is a direct transcriptional target of RHD6
222	AT1G27820	CCR4-ASSOCIATED FACTOR 1C (CAF1C)	Deadenylase.
223	AT1G28100		hypothetical protein
224	AT1G28130	GRETCHEN HAGEN 3.17 (GH3.17)	Encodes an IAA-amido synthase that conjugates Asp and other amino acids to auxin in vitro. Lines carrying insertions in this gene are hypersensitive to auxin.
225	AT1G28580		GDSL-motif esterase/acyltransferase/lipase. Enzyme group with broad substrate specificity that may catalyze acyltransfer or hydrolase reactions with lipid and non-lipid substrates.
226	AT1G29050	TRICHOME BIREFRINGENCE-LIKE 38 (TBL38)	Encodes a member of the TBL (TRICHOME BIREFRINGENCE-LIKE) gene family containing a plant-specific DUF231 (domain of unknown function) domain. TBL gene family has 46 members, two of which (TBR/AT5G06700 and TBL3/AT5G01360) have been shown to be involved in the synthesis and deposition of secondary wall cellulose, presumably by influencing the esterification state of pectic polymers. A nomenclature…
227	AT1G29195		PADRE protein up-regulated after infection by S. sclerotiorum.
228	AT1G29280	WRKY DNA-BINDING PROTEIN 65 (WRKY65)	member of WRKY Transcription Factor; Group II-e The mRNA is cell-to-cell mobile.
229	AT1G29460	SMALL AUXIN UPREGULATED RNA 65 (SAUR65)	SAUR-like auxin-responsive protein family
230	AT1G29520		AWPM-19-like family protein
231	AT1G29630		5-3 exonuclease family protein
232	AT1G30100	NINE-CIS-EPOXYCAROTENOID DIOXYGENASE 5 (NCED5)	Encodes 9-cis-epoxycarotenoid dioxygenase, a key enzyme in the biosynthesis of abscisic acid. The expression of this gene increases during the first 6h of imbibition.
233	AT1G30120	PYRUVATE DEHYDROGENASE E1 BETA (PDH-E1 BETA)	Encodes a putative plastid pyruvate dehydrogenase E1 beta subunit that is distinct from the mitochondrial pyruvate dehydrogenase E1 beta subunit.
234	AT1G30380	PHOTOSYSTEM I SUBUNIT K (PSAK)	Encodes subunit K of photosystem I reaction center. The mRNA is cell-to-cell mobile.
235	AT1G30700	(ATBBE8)	FAD-binding Berberine family protein
236	AT1G30840	PURINE PERMEASE 4 (PUP4)	Member of a family of proteins related to PUP1, a purine transporter. May be involved in the transport of purine and purine derivatives such as cytokinins, across the plasma membrane.
237	AT1G30960	(ERA-2)	Ortholog of ERA (E. coli RAS-like protein)-related GTPase (ERG). Mitochondrial protein that associates with 18sRNA. Heterozygous mutants segregate for embryo lethality inherited as a sporphytic maternal effect. Increased ROS in the mutant ovule suggests a heritable mitochondrial defect results in lethality.
238	AT1G31050	PERICYCLE FACTOR TYPE-A 1 (PFA1)	Together with PFA2 and PFA3 governs the competence of pericycle cells to initiate lateral root primordium formation.
239	AT1G31290	ARGONAUTE 3 (AGO3)	ARGONAUTE 3
240	AT1G31310		hydroxyproline-rich glycoprotein family protein
241	AT1G31330	PHOTOSYSTEM I SUBUNIT F (PSAF)	Encodes subunit F of photosystem I.
242	AT1G31700
243	AT1G31770	ATP-BINDING CASSETTE G14 (ABCG14)	ATP-binding cassette 14
244	AT1G31920		Tetratricopeptide repeat (TPR)-like superfamily protein
245	AT1G32060	PHOSPHORIBULOKINASE (PRK)	phosphoribulokinase
246	AT1G32080	(LrgB)	Encodes a plant LrgAB/CidAB protein localized to the chloroplast envelope that is involved in chloroplast development, carbon partitioning, ABA/drought response, and leaf senescence. The gene may have evolved from gene fusion of bacterial lrgA and lrgB.
247	AT1G32350	ALTERNATIVE OXIDASE 1D (AOX1D)	Alternative oxidase (AOX); terminal oxidases of electron transfer in mitochondria.
248	AT1G32450	NRT1/ PTR FAMILY 7.3 (NPF7.3)	Transmembrane nitrate transporter. Involved in xylem transport of nitrate from root to shoot. Induced in response to high and low concentrations of nitrate. Not involved in nitrate uptake. Expressed in root pericycle cells under the control of MYB59. Also functions as a proton-coupled H+/K+ antiporter for K+ loading into the xylem.
249	AT1G32470	(GDC-H1)	Single hybrid motif superfamily protein
250	AT1G32550	FERREDOXIN C 2 (FdC2)	Encodes FdC2, a ferredoxin protein capable of alternative electron partitioning. FdC1 level increases in conditions of acceptor limitation at PSI.
251	AT1G32740		SBP (S-ribonuclease binding protein) family protein
252	AT1G32760		Glutaredoxin family protein
253	AT1G32800
254	AT1G32830		transposable_element_gene;similar to heat shock protein binding [Arabidopsis thaliana] (TAIR:AT3G30450.1);(source:TAIR10)
255	AT1G32870	NAC DOMAIN PROTEIN 13 (NAC13)	Expression in rosette leaves is activated by high concentration of boron.
256	AT1G32900	GRANULE BOUND STARCH SYNTHASE 1 (GBSS1)	UDP-Glycosyltransferase superfamily protein
257	AT1G33055	HYPOXIA RESPONSE UNKNOWN PROTEIN 32 (HUP32)	hypothetical protein
258	AT1G33110		MATE efflux family protein
259	AT1G33260		Protein kinase superfamily protein
260	AT1G33280	NAC DOMAIN CONTAINING PROTEIN 15 (NAC015)	NAC domain protein. SMB, BRN1, and BRN2 act to regulate root cap maturation, in a partially redundant fashion.BRN1 and BRN2, control the cell wall maturation processes that are required to detach root cap layers from the root.
261	AT1G33440	NRT1/ PTR FAMILY 4.4 (NPF4.4)	Major facilitator superfamily protein
262	AT1G33500		tropomyosin
263	AT1G33590		Leucine-rich repeat (LRR) family protein
264	AT1G33600		Leucine-rich repeat (LRR) family protein
265	AT1G33700		Beta-glucosidase, GBA2 type family protein
266	AT1G33750	TERPENE SYNTHASE 22 (TPS22)	Sesterterpene synthase which produces various sesterpne backbones bia type-A cyclization mechanism.
267	AT1G33811	(GGL7)	GDSL-motif esterase/acyltransferase/lipase. Enzyme group with broad substrate specificity that may catalyze acyltransfer or hydrolase reactions with lipid and non-lipid substrates.
268	AT1G33860		hypothetical protein
269	AT1G34180	NAC DOMAIN CONTAINING PROTEIN 16 (NAC016)	NAC domain containing protein 16
270	AT1G34430	EMBRYO DEFECTIVE 3003 (EMB3003)	2-oxoacid dehydrogenases acyltransferase family protein
271	AT1G34640		peptidase
272	AT1G34750	CERK-1 INTERACTING PROTEIN PHOSPHATASE 1 (CIPP1)	Protein phosphatase 2C family protein
273	AT1G35260	MLP-LIKE PROTEIN 165 (MLP165)	MLP-like protein 165
274	AT1G35290	ACYL-LIPID THIOESTERASE 1 (ALT1)	Thioesterase superfamily protein
275	AT1G35420		alpha/beta-Hydrolases superfamily protein
276	AT1G35910	TREHALOSE-6-PHOSPHATE PHOSPHATASE D (TPPD)	Haloacid dehalogenase-like hydrolase (HAD) superfamily protein
277	AT1G37110		transposable_element_gene;copia-like retrotransposon family, has a 0. P-value blast match to GB:CAA31653 polyprotein (Ty1_Copia-element) (Arabidopsis thaliana);(source:TAIR10)
278	AT1G41930		transposable_element_gene;CACTA-like transposase family (Tnp1/En/Spm), has a 3.8e-118 P-value blast match to ref|NP_189784.1| TNP1-related protein (Arabidopsis thaliana) (CACTA-element);(source:TAIR10)
279	AT1G42570		pseudogene of FAR1-related sequence 5
280	AT1G42970	GLYCERALDEHYDE-3-PHOSPHATE DEHYDROGENASE B SUBUNIT (GAPB)	Encodes chloroplast localized glyceraldehyde-3-phosphate dehydrogenase that can use both NADH and NADPH to reduce 1,3-diphosphate glycerate. It forms A2B2 heterotetramers with GapA forms of the GADPH enzyme. These complexes are active in the light under reducing conditions, but show reduced NADPH-dependent activity in response to oxidized thioredoxins and increased NAD(H)/NADP(H) ratios due to th…
281	AT1G43020		electron protein, putative (Protein of unknown function, DUF547)
282	AT1G43800	FLORAL TRANSITION AT THE MERISTEM1 (FTM1)	&#916;9 stearoyl-ACP desaturase which together with FAB2, AAD1, and AAD5 redundantly participates in oil storage during the maturation phase.
283	AT1G43930		transposable_element_gene;Mutator-like transposase family, has a 1.2e-56 P-value blast match to GB:AAA21566 mudrA of transposon=MuDR (MuDr-element) (Zea mays);(source:TAIR10)
284	AT1G44000	STAY-GREEN LIKE (SGRL)	STAY-GREEN-like protein
285	AT1G44760		Adenine nucleotide alpha hydrolases-like superfamily protein
286	AT1G44830	ERF TRANSCRIPTION FACTOR 14 (ERF014)	Encodes a nuclear-localized member of the DREB subfamily A-5 of ERF/AP2 transcription factor family. The protein contains one AP2 domain. There are 15 members in this subfamily including RAP2.1, RAP2.9 and RAP2.10. Overexpression in cultured cells results in an increase in pectin deposition.ERF014 differentially regulates responses to bacterial and fungal pathogens.
287	AT1G45474	PHOTOSYSTEM I LIGHT HARVESTING COMPLEX GENE 5 (LHCA5)	Encodes a component of the light harvesting complex of photosystem I.
288	AT1G45616	RECEPTOR LIKE PROTEIN 6 (RLP6)	receptor like protein 6
289	AT1G47210	CYCLIN-DEPENDENT PROTEIN KINASE 3;2 (CYCA3;2)	cyclin-dependent protein kinase 3
290	AT1G47465		transposable_element_gene;gypsy-like retrotransposon family (Athila), has a 9.7e-17 P-value blast match to GB:CAA57397 Athila ORF 1 (Arabidopsis thaliana);(source:TAIR10)
291	AT1G47980		desiccation-like protein
292	AT1G48100	POLYGALACTURONASE INVOLVED IN EXPANSION3 (PGX3)	Pectin lyase-like superfamily protein
293	AT1G48260	CBL-INTERACTING PROTEIN KINASE 17 (CIPK17)	Encodes a member of the SNF1-related kinase (SnRK) gene family (SnRK3.21), which has also been reported as a member of the CBL-interacting protein kinases (CIPK17).
294	AT1G48350	EMBRYO DEFECTIVE 3105 (EMB3105)	Member of the uL18 RNA-binding protein family. uL18 proteins share a short structurally conserved domain that binds the 5S rRNA and allow its incorporation into ribosomes.
295	AT1G48510	SURFEIT 1B (SURF1B)	Encodes one of two Arabidopsis mitochondrial proteins similar to human SURF1 which is known to be involved in cytochrome c oxidase assembly. Mutations result in defects in hypocotyl elongation and changes in GA homeostasis.
296	AT1G48570		zinc finger (Ran-binding) family protein
297	AT1G48600	PHOSPHOETHANOLAMINE N-METHYLTRANSFERASE (PMEAMT)	Encodes a phosphoethanolamine N-methyltransferase that catalyses the last two methylation steps of the three sequential methylations of phosphoethanolamine (PEA) that are required for the synthesis of phosphocholine (PCho) in plants.
298	AT1G48660		Auxin-responsive GH3 family protein
299	AT1G49110		hypothetical protein
300	AT1G49430	LONG-CHAIN ACYL-COA SYNTHETASE 2 (LACS2)	Encodes a long chain acyl-CoA synthetase that catalyzes the synthesis of omega-hydroxy fatty acyl-CoA intermediates in the pathway to cutin synthesis. Required for repression of lateral root formation.
301	AT1G49470		transmembrane epididymal protein (DUF716)
302	AT1G49480	RELATED TO VERNALIZATION1 1 (RTV1)	Encodes a nuclear-localized DNA-binding protein that interacts with ITN1 at the PM and nuclei in vivo and may regulate ITN's subcellular localization.
303	AT1G49570		Peroxidase superfamily protein
304	AT1G49650		alpha/beta-Hydrolases superfamily protein
305	AT1G49830		basic helix-loop-helix (bHLH) DNA-binding superfamily protein
306	AT1G49840	BOUNDARY OF ROP DOMAIN5 (BDR5)	glutamyl-tRNA (Gln) amidotransferase subunit A (DUF620)
307	AT1G49860	GLUTATHIONE S-TRANSFERASE (CLASS PHI) 14 (GSTF14)	Encodes glutathione transferase belonging to the phi class of GSTs. Naming convention according to Wagner et al. (2002). The mRNA is cell-to-cell mobile.
308	AT1G49975		photosystem I reaction center subunit N
309	AT1G50060		CAP (Cysteine-rich secretory proteins, Antigen 5, and Pathogenesis-related 1 protein) superfamily protein
310	AT1G50080		ribonuclease
311	AT1G50110	BRANCHED-CHAIN AMINOTRANSFERASE 6 (BCAT6)	Encodes a cytosolic branched-chain aminotransferase that acts on Leu, Ile, Val and also on Met. Together with BCAT4 and BCAT3, it is involved in methionine salvage and glucosinolate biosynthesis.
312	AT1G50150
313	AT1G50280	BTB/POZ PROTEIN HYPERSENSITIVE TO ABA 1 (BPH1)	BTB/POZ protein that forms a complex with CUL3a. Involved in repression of ABA responses.
314	AT1G50390		pfkB-like carbohydrate kinase family protein
315	AT1G50430	DWARF 5 (DWF5)	Mutants are defective in Brassinosteroid biosynthesis (delta7-sterol-C7 reduction step) and have a dwarf phenotype. EXO70 interactor and presumed negative secretion regulator.
316	AT1G50570		Calcium-dependent lipid-binding (CaLB domain) family protein
317	AT1G50630		extracellular ligand-gated ion channel protein (DUF3537)
318	AT1G50680		AP2/B3 transcription factor family protein
319	AT1G50720		Stigma-specific Stig1 family protein
320	AT1G50900	GRANA DEFICIENT CHLOROPLAST 1 (GDC1)	Encodes GDC1 (Grana Deficient Chloroplast 1), an ankyrin domain containing protein required fro chloroplast thylakoid grana formation. The mRNA is cell-to-cell mobile.
321	AT1G51080		golgin family A protein
322	AT1G51190	PLETHORA 2 (PLT2)	Encodes a member of the AINTEGUMENTA-like (AIL) subclass of the AP2/EREBP family of transcription factors and is essential for quiescent center (QC) specification and stem cell activity. It is a key effector for establishment of the stem cell niche during embryonic pattern formation. It is transcribed in response to auxin accumulation and is dependent on auxin response transcription factors.
323	AT1G51380		DEA(D/H)-box RNA helicase family protein
324	AT1G51400		Photosystem II 5 kD protein
325	AT1G51440	DAD1-LIKE LIPASE 2 (DALL2)	Encodes a lipase that hydrolyzes phosphatidylcholine, glycolipids as well as triacylglycerols.
326	AT1G51680	4-COUMARATE:COA LIGASE 1 (4CL1)	encodes an isoform of 4-coumarate:CoA ligase (4CL), which is involved in the last step of the general phenylpropanoid pathway. In addition to 4-coumarate, it also converts ferulate. The catalytic efficiency was in the following (descending) order: p-coumaric acid, ferulic acid, caffeic acid and 5-OH-ferulic acid. At4CL1 was unable to use sinapic acid as substrate.
327	AT1G51850	STRESS INDUCED FACTOR 2 (SIF2)	Malectin-like receptor-like kinase involved in MAMP mediated stomatal immunity. Interacts with BAK1/FLS2 signaling complex and subsequently phosphorylates and activates SLAC1.
328	AT1G51980		Insulinase (Peptidase family M16) protein
329	AT1G52070		Mannose-binding lectin superfamily protein
330	AT1G52100		Mannose-binding lectin superfamily protein
331	AT1G52200		PLAC8 family protein
332	AT1G52220	CURVATURE THYLAKOID 1C (CURT1C)	Thylakoid membrane localized protein that interacts with other CURT family proteins. Oligomerization is associated with grana thylakoid curavature.
333	AT1G52450		Ubiquitin carboxyl-terminal hydrolase-related protein
334	AT1G52510		alpha/beta-Hydrolases superfamily protein
335	AT1G52580	RHOMBOID-LIKE PROTEIN 5 (RBL5)	RHOMBOID-like protein 5
336	AT1G52680		late embryogenesis abundant protein-related / LEA protein-like protein
337	AT1G52710		Rubredoxin-like superfamily protein
338	AT1G52910		fiber (DUF1218)
339	AT1G52930	ARABIDOPSIS HOMOLOGUE OF YEAST BRX1 2 (ATBRX1-2)	Encodes one of two Arabidopsis orthologs of yeast BRX1, a protein involved in maturation of the large ribosomal subunit. The proteins are mainly localized in nucleolus. Mutant plants are affected in pre-rRNA processing.
340	AT1G53035		transmembrane protein
341	AT1G53170	ETHYLENE RESPONSE FACTOR 8 (ERF8)	encodes a member of the ERF (ethylene response factor) subfamily B-1 of ERF/AP2 transcription factor family (ATERF-8). The protein contains one AP2 domain. There are 15 members in this subfamily including ATERF-3, ATERF-4, ATERF-7, and leafy petiole.
342	AT1G53520	FATTY-ACID-BINDING PROTEIN 3 (FAP3)	Encodes a plastid stroma localized fatty acid binding protein involved in fatty acid metabolism.
343	AT1G53560		Ribosomal protein L18ae family
344	AT1G53645		hydroxyproline-rich glycoprotein family protein
345	AT1G53830	PECTIN METHYLESTERASE 2 (PME2)	encodes a pectin methylesterase
346	AT1G53885		linoleate 9S-lipoxygenase-4 protein, putative (DUF581). Senescence associated protein, expression regulated by cytokinin.
347	AT1G54040	EPITHIOSPECIFIER PROTEIN (ESP)	Epithiospecifier protein, interacts with WRKY53. Involved in pathogen resistance and leaf senescence.
348	AT1G54340	ISOCITRATE DEHYDROGENASE (ICDH)	NADP-specific isocitrate dehydrogenase (ICDH) The mRNA is cell-to-cell mobile.
349	AT1G54420		hypothetical protein
350	AT1G54500		RBD1 is a thylakoid membrane-bound iron-binding protein that is required for the proper assembly of photosystem II in Arabidopsis. It is found in all oxygenic photoautotrophic organisms (plants, algae and cyanobacteria).
351	AT1G54780	THYLAKOID LUMEN PROTEIN 18.3 (TLP18.3)	Encodes a thylakoid lumen protein regulating photosystem II repair cycle. Has acid phosphatase activity. The mRNA is cell-to-cell mobile.
352	AT1G54790		GDSL-motif esterase/acyltransferase/lipase. Enzyme group with broad substrate specificity that may catalyze acyltransfer or hydrolase reactions with lipid and non-lipid substrates.
353	AT1G54890		Late embryogenesis abundant (LEA) protein-like protein
354	AT1G55120	BETA-FRUCTOFURANOSIDASE 5 (FRUCT5)	Encodes a protein with fructan exohydrolase (FEH) activity acting on levan-type fructans (6-FEH, levanase). The enzyme does not have invertase activity.
355	AT1G55260	GLYCOSYLPHOSPHATIDYLINOSITOL-ANCHORED LIPID PROTEIN TRANSFER 6 (LTPG6)	Bifunctional inhibitor/lipid-transfer protein/seed storage 2S albumin superfamily protein
356	AT1G55265		DUF538 family protein, putative (Protein of unknown function, DUF538)
357	AT1G55440		Cysteine/Histidine-rich C1 domain family protein
358	AT1G55610	BRI1 LIKE (BRL1)	mutant has Altered vascular cell differentiation; LRR Receptor Kinase
359	AT1G55640	PRENYLATED RAB ACCEPTOR 1.G1 (PRA1.G1)	prenylated RAB acceptor 1.G1
360	AT1G55670	PHOTOSYSTEM I SUBUNIT G (PSAG)	Encodes subunit G of photosystem I, an 11-kDa membrane protein that plays an important role in electron transport between plastocyanin and PSI and is involved in the stability of the PSI complex. PSI-G subunit is bound to PSI-B and is in contact with Lhca1. The protein inserts into thylakoids by a direct or "spontaneous" pathway that does not involve the activities of any known chloroplast protei…
361	AT1G55740	SEED IMBIBITION 1 (SIP1)	seed imbibition 1
362	AT1G55810	URIDINE KINASE-LIKE 3 (UKL3)	One of the homologous genes predicted to encode proteins with UPRT domains (Uracil phosphoribosyltransferase). Five of these genes (At5g40870, At3g27190, At1g55810, At4g26510 and At3g27440) show a high level of identity, and are annotated as also containing a N-terminal uracil kinase (UK) domain. These genes are referred to as UKL1 (UK-like 1), UKL2, UKL3, UKL4 and UKL5, respectively.
363	AT1G55850	CELLULOSE SYNTHASE LIKE E1 (CSLE1)	encodes a protein similar to cellulose synthase The mRNA is cell-to-cell mobile.
364	AT1G55920	SERINE ACETYLTRANSFERASE 2;1 (SERAT2;1)	Encodes a chloroplast/cytosol localized serine O-acetyltransferase involved in sulfur assimilation and cysteine biosynthesis. Expressed in the vascular system. The mRNA is cell-to-cell mobile.
365	AT1G56010	NAC DOMAIN CONTAINING PROTEIN 1 (NAC1)	Encodes a transcription factor involved auxin-mediated lateral root formation. Acts downstream of TIR1 and is regulated post-transcriptionally by miRNA164 and by SINAT5-dependent ubiquitination.
366	AT1G56060	CYSTEINE-RICH TRANSMEMBRANE MODULE 3 (ATHCYSTM3)	CYSTM3 is a mitochondrial protein that is induced by salt stress and is a negative regulator of salt stress.
367	AT1G56150	SMALL AUXIN UPREGULATED 71 (SAUR71)	SAUR-like auxin-responsive protein family
368	AT1G56170	NUCLEAR FACTOR Y, SUBUNIT C2 (NF-YC2)	Encodes a protein with similarity to a subunit of the CCAAT promoter motif binding complex of yeast.One of two members of this class (HAP5B) and expressed in vegetative and reproductive tissues. Involved in the regulation of response to nutrient levels.
369	AT1G56200	EMBRYO DEFECTIVE 1303 (emb1303)	Encodes a chloroplast localized protein that is essential for chloroplast development.
370	AT1G56680		Chitinase family protein
371	AT1G57790	FBOX/DUF295-RELATED 1 (ATFDR1)	F-box family protein
372	AT1G57990	PURINE PERMEASE 18 (PUP18)	Member of a family of proteins related to PUP1, a purine transporter. May be involved in the transport of purine and purine derivatives such as cytokinins, across the plasma membrane.
373	AT1G58150		phosphoglycerate kinase
374	AT1G58420		Uncharacterized conserved protein UCP031279
375	AT1G59124		Disease resistance protein (CC-NBS-LRR class) family
376	AT1G59500	(GH3.4)	encodes an IAA-amido synthase that conjugates Asp and other amino acids to auxin in vitro.
377	AT1G59740	NRT1/ PTR FAMILY 4.3 (NPF4.3)	Major facilitator superfamily protein
378	AT1G59860	(HSP17.6A)	HSP20-like chaperones superfamily protein
379	AT1G59870	PENETRATION 3 (PEN3)	ATP binding cassette transporter. Localized to the plasma membrane in uninfected cells. In infected leaves, the protein concentrated at infection sites. Contributes to nonhost resistance to inappropriate pathogens that enter by direct penetration in a salicylic acid?dependent manner. Required for mlo resistance. Has Cd transporter activity (Cd2+ extrusion pump) and contributes to heavy metal resi…
380	AT1G59940	RESPONSE REGULATOR 3 (ARR3)	Type A response regulator highly similar to bacterial two-component response regulators. Rapidly induced by cytokinin. Involved in red-light signaling. Acts redundantly with ARR3 in the control of circadian period in a cytokinin-independent manner.
381	AT1G60000		RNA-binding (RRM/RBD/RNP motifs) family protein
382	AT1G60060		Serine/threonine-protein kinase WNK (With No Lysine)-like protein
383	AT1G60090	BETA GLUCOSIDASE 4 (BGLU4)	beta glucosidase 4
384	AT1G60190	PLANT U-BOX 19 (PUB19)	Encodes PUB19, a plant U-box armadillo repeat protein. Involved in salt inhibition of germination together with PUB18. The mRNA is cell-to-cell mobile.
385	AT1G60270	BETA GLUCOSIDASE 6 (BGLU6)	beta glucosidase 6
386	AT1G60300		NAC (No Apical Meristem) domain transcriptional regulator superfamily protein
387	AT1G60730		NAD(P)-linked oxidoreductase superfamily protein
388	AT1G60810	ATP-CITRATE LYASE A-2 (ACLA-2)	One of the three genes encoding subunit A of the trimeric enzyme ATP Citrate lyase
389	AT1G60850	(ATRPAC42)	DNA-directed RNA polymerase family protein
390	AT1G60950	(FED A)	encodes a major leaf ferredoxin
391	AT1G60960	IRON REGULATED TRANSPORTER 3 (IRT3)	Encodes a plasma membrane localized zinc/iron transporter.
392	AT1G60970		SNARE-like superfamily protein
393	AT1G61070	LOW-MOLECULAR-WEIGHT CYSTEINE-RICH 66 (LCR66)	Predicted to encode a PR (pathogenesis-related) protein. Belongs to the plant defensin (PDF) family with the following members: At1g75830/PDF1.1, At5g44420/PDF1.2a, At2g26020/PDF1.2b, At5g44430/PDF1.2c, At2g26010/PDF1.3, At1g19610/PDF1.4, At1g55010/PDF1.5, At2g02120/PDF2.1, At2g02100/PDF2.2, At2g02130/PDF2.3, At1g61070/PDF2.4, At5g63660/PDF2.5, At2g02140/PDF2.6, At5g38330/PDF3.1 and At4g30070/PDF…
394	AT1G61110	NAC DOMAIN CONTAINING PROTEIN 25 (NAC025)	NAC transcription regulator. Regulates endosperm cell expansion during germination.
395	AT1G61340	F-BOX STRESS INDUCED 1 (FBS1)	Encodes a F-box protein induced by various biotic or abiotic stress.
396	AT1G61380	S-DOMAIN-1 29 (SD1-29)	Encodes a membrane localized S-domain receptor kinase that is involved in lipopolysaccharide (LPS) sensing. SD1-29 detected LPS of Pseudomonas and Xanthomonas species for which it serves as a microbe associated molecular pattern triggering innate immunity. Loses of function mutants are hyper susceptible to P.syringae.
397	AT1G61590	PBS1-LIKE 15 (PBL15)	Protein kinase superfamily protein
398	AT1G61640		Protein kinase superfamily protein
399	AT1G61740		Sulfite exporter TauE/SafE family protein
400	AT1G61800	GLUCOSE-6-PHOSPHATE/PHOSPHATE TRANSLOCATOR 2 (GPT2)	glucose6-Phosphate/phosphate transporter 2. Expression is upregulated in the shoot of cax1/cax3 mutant. The mRNA is cell-to-cell mobile.
401	AT1G61930	(S40-6)	senescence regulator (Protein of unknown function, DUF584)
402	AT1G62030		Cysteine/Histidine-rich C1 domain family protein
403	AT1G62070		hypothetical protein
404	AT1G62300	(WRKY6)	Encodes a transcription factor WRKY6. Regulates Phosphate1 (Pho1) expression in response to low phosphate (Pi) stress.
405	AT1G62500	(DEG27)	Bifunctional inhibitor/lipid-transfer protein/seed storage 2S albumin superfamily protein
406	AT1G62510		Expressed in the root cortex.
407	AT1G62530		hypothetical protein (DUF863)
408	AT1G62620		Flavin-binding monooxygenase family protein
409	AT1G62730		Terpenoid synthases superfamily protein
410	AT1G62840		ankyrin repeat/KH domain protein (DUF1442)
411	AT1G62910	RF-LIKE 9 (RFL9)	Encodes PPR protein involved in mitochondrial 5' end processing. Ecotype variants show differences in processing.
412	AT1G62990	KNOTTED-LIKE HOMEOBOX OF ARABIDOPSIS THALIANA 7 (KNAT7)	Encodes a homeodomain transcription factor of the Knotted family. May be involved in secondary cell wall biosynthesis. Mutants have moderately irregular xylem development. Expression of this gene is upregulated by SND1 and MYB46.
413	AT1G63240	ROS1-ASSOCIATED METHYL-DNA BINDING PROTEIN 1 (RMB1)	Methyl-DNA binding protein which interacts with RMB1 and ROS1 acting in the base excision repair pathway through DNA methylation.
414	AT1G63440	HEAVY METAL ATPASE 5 (HMA5)	The Arabidopsis P-type ATPase HMA5 is involved in Cu detoxification. hma5 mutant plants exhibit Cu hypersensitivity, which is especially dramatic in roots where HMA5 is mostly expressed.
415	AT1G63550		Receptor-like protein kinase-related family protein
416	AT1G63650	ENHANCER OF GLABRA 3 (EGL3)	Mutant has reduced trichomes, anthocyanin, and seed coat mucilage and abnormally patterned stomates. Mutants are defective in jasmonate-induced anthocyanin accumulation. Encodes a bHLH Transcription Factor 1. The protein is functionally redundant with GL3 and TT8 and interacts with TTG1, the myb proteins GL1, PAP1 and 2, CPC and TRY, and it will form heterodimers with GL3. Expression in N (non-ha…
417	AT1G63660		GMP synthase (glutamine-hydrolyzing), putative / glutamine amidotransferase
418	AT1G63750		miR825-5p target proposed as a phasiRNA producing locus.
419	AT1G63840		RING/U-box superfamily protein
420	AT1G64140		WRKY transcription factor
421	AT1G64170	CATION/H+ EXCHANGER 16 (CHX16)	member of Putative Na+/H+ antiporter family
422	AT1G64370	PHLOEM ASSOCIATED RNA CHAPERONE-LIKE (PARCL)	filaggrin-like protein
423	AT1G64400	LONG-CHAIN ACYL-COA SYNTHETASE 3 (LACS3)	AMP-dependent synthetase and ligase family protein
424	AT1G64470
425	AT1G64600		copper ion binding / methyltransferase
426	AT1G64670	BODYGUARD1 (BDG1)	Encodes a epidermally expressed extracellular protein that likely functions as an alpha-beta hydrolase and is required for normal cuticle formation. Homozygous mutant plants are dwarfed and have abnormal leaves, collapsed cells, reduced numbers of trichomes. The specific role of BDG is unclear: it may function in cutin biosynthesis or as a cross-linking enzyme in the cell wall itself.
427	AT1G64680		beta-carotene isomerase D27
428	AT1G64720	MEMBRANE RELATED PROTEIN CP5 (CP5)	membrane related protein CP5
429	AT1G64950	CYTOCHROME P450, FAMILY 89, SUBFAMILY A, POLYPEPTIDE 5 (CYP89A5)	member of CYP89A The mRNA is cell-to-cell mobile.
430	AT1G65090		nucleolin
431	AT1G65180		Cysteine/Histidine-rich C1 domain family protein
432	AT1G65370		TRAF-like family protein
433	AT1G65510	(STMP7)	Secreted peptide which functions in plant growth and pathogen defense.
434	AT1G65570	ROOT CAP POLYGALACTURONASE (RCPG)	Encodes a glycosyl hydrolase 28 (GH28) family polygalacturonase (PG) protein. Involved in root cap development.
435	AT1G65620	ASYMMETRIC LEAVES 2 (AS2)	required for formation of a symmetric flat leaf lamina, encodes a member of a family of proteins characterized by cysteine repeats and a leucine zipper; involved in KNOX gene regulation. Acts together with ASL1 in proximal-distal symmetry determination. Forms a complex with AS1 that binds to the BP promoter and leads to silencing of BP.
436	AT1G65730	YELLOW STRIPE LIKE 7 (YSL7)	Arabidopsis thaliana metal-nicotianamine transporter YSL4
437	AT1G65880	BENZOYLOXYGLUCOSINOLATE 1 (BZO1)	Encodes a benzoate-CoA ligase. Involved in the biosynthesis of benzoyloxyglucosinolate in Arabidopsis seeds.
438	AT1G65900		plant/protein
439	AT1G66130		NAD(P)-binding Rossmann-fold superfamily protein
440	AT1G66430	FRUCTOKINASE 3 (FRK3)	Encodes one of the several Arabidopsis fructokinases. Nomenclature according to Riggs 2017 has been adopted for the family by the community (personal communication, Boernke, Callis, Granot, Boernke, and Smeekens). Important for seed oil accumulation and vascular development.
441	AT1G66470	ROOT HAIR DEFECTIVE6 (RHD6)	ROOT HAIR DEFECTIVE6
442	AT1G66830		Leucine-rich repeat protein kinase family protein
443	AT1G66840	PLASTID MOVEMENT IMPAIRED 2 (PMI2)	Encodes a coiled-coil protein WEB2 (weak chloroplast movement under blue light 2, also named PMI2/plastid movement impaired 2). Involved in chloroplast avoidance movement under intermediate and high light intensities. WEB2, together with another coiled-coil protein WEB1 (AT2G26570), maintains the chloroplast photorelocation movement velocity.
444	AT1G66920		Protein kinase superfamily protein
445	AT1G66930	LEAF RUST 10 DISEASE-RESISTANCE LOCUS RECEPTOR- LIKE PROTEIN KINASE-LIKE2 (LRK10L2)	Protein kinase superfamily protein
446	AT1G67560	LIPOXYGENASE 6 (LOX6)	PLAT/LH2 domain-containing lipoxygenase family protein
447	AT1G67590		Remorin family protein
448	AT1G67600		Acid phosphatase/vanadium-dependent haloperoxidase-related protein
449	AT1G67700	HYPERSENSITIVE TO HIGH LIGHT 1 (HHL1)	multidrug resistance protein
450	AT1G67740	PHOTOSYSTEM II BY (PSBY)	PsbY precursor (psbY) mRNA. This single nuclear gene is imported into the chloroplasts where it is processed into two integral membrane proteins with identical topology (PsbY-1 and PsbY-2). The protein appears to bind manganese. Important for the redox control of cytochrome b559.
451	AT1G67770	TERMINAL EAR1-LIKE 2 (TEL2)	Similar to terminal ear1 in Zea mays. A member of mei2-like gene family; phylogenetic analysis revealed that TEL2 belongs to the third clade of mei2-like proteins (TEL clade), with conserved two N-terminal RNA recognition motifs (RRM), in addition to the C-terminal RRM, shared among all mei2-like proteins. Expression patterns were similar to TEL1, with lower expression levels in most tissues exam…
452	AT1G67870		glycine-rich protein
453	AT1G68010	HYDROXYPYRUVATE REDUCTASE (HPR)	Encodes hydroxypyruvate reductase.
454	AT1G68330		membrane-associated kinase regulator
455	AT1G68400		leucine-rich repeat transmembrane protein kinase family protein
456	AT1G68440		Transmembrane protein. Expression induced by abiotic stressors such as ABA, drought, heat, light, NaCl, osmotic stress and wounding.
457	AT1G68520	B-BOX DOMAIN PROTEIN 14 (BBX14)	B-box type zinc finger protein with CCT domain-containing protein
458	AT1G68585		hypothetical protein
459	AT1G68590	PLASTID-SPECI&#64257;C RIBOSOMAL PROTEIN 3/1 (PSRP3/1)	Ribosomal protein PSRP-3/Ycf65
460	AT1G68650	PHOTOSYNTHESIS-AFFECTED MUTANT 71 LIKE 5 (PML5)	Member of the UPF0016 family of membrane proteins, belongs to the conserved group of Mn/Ca transporters. Might act to fine tune Mn allocation into the endoplasmic reticulum of specific cell types.
461	AT1G68740	(PHO1;H1)	Encodes PHO1;H1, a member of the PHO1 family. Involved in inorganic phosphate (Pi) transport and homeostasis. Complements pho1 mutation. Its expression is responsive to both phosphate (Pi) and phosphite (Phi) in shoots.
462	AT1G68765	INFLORESCENCE DEFICIENT IN ABSCISSION (IDA)	Encodes a small protein of 77 amino acids. Loss of function mutations are defective in the process of ethylene independent floral organ abscission. Although the mutants have a normal appearing abscission zone, the floral organs do not abscisce. The peptide appears to be secreted and may function as a ligand. Arabidopsis 35S:IDA lines constitutively overexpressing IDA exhibit earlier abscission of…
463	AT1G68910	WPP DOMAIN-INTERACTING PROTEIN 2 (WIT2)	Encodes one of the WPP domain-interacting proteins (WIT1/AT5G11390, WIT2/AT1G68910) required for RanGAP nuclear envelope association in root tip cells. Ran GTPase plays essential roles in multiple cellular processes, including nucleocytoplasmic transport, spindle formation, and postmitotic nuclear envelope reassembly. The cytoplasmic Ran GTPase activating protein RanGAP is critical to establish a…
464	AT1G69080		Adenine nucleotide alpha hydrolases-like superfamily protein
465	AT1G69230	SPIRAL1-LIKE2 (SP1L2)	SPIRAL1-LIKE2 belongs to a six-member gene family in Arabidopsis; all members share a high sequence similarity in amino- and carboxy-terminal regions. Regulates cortical microtubule organization. Mutant plants exhibit altered patterns of root and organ growth as a result of defective anisotropic cell expansion.
466	AT1G69260	ABI FIVE BINDING PROTEIN (AFP1)	ABI five binding protein
467	AT1G69480		EXS (ERD1/XPR1/SYG1) family protein
468	AT1G69600	ZINC FINGER HOMEODOMAIN 1 (ZFHD1)	Encodes ZFHD1, a member of the zinc finger homeodomain transcriptional factor family. Binds to the 62 bp promoter region of ERD1 (early responsive to dehydration stress 1). Expression of ZFHD1 is induced by drought, high salinity and abscisic acid.
469	AT1G69610		zinc finger FYVE domain protein, putative (DUF1666)
470	AT1G69750	CYTOCHROME C OXIDASE 19-2 (COX19-2)	cytochrome c oxidase 19-2
471	AT1G69850	NRT1/ PTR FAMILY 4.6 (NPF4.6)	Encodes an inducible component of low-affinity nitrate uptake. mRNA found primarily in root hairs and the epidermis of roots. It also acts as an ABA importer at the site of ABA biosynthesis and is important for the regulation of stomatal aperture in inflorescence stems.
472	AT1G69870	NRT1/ PTR FAMILY 2.13 (NPF2.13)	Encodes a low affinity nitrate transporter NRT1.7. Expressed in phloem. Responsible for source-to-sink remobilization of nitrate. The mRNA is cell-to-cell mobile.
473	AT1G69930	GLUTATHIONE S-TRANSFERASE TAU 11 (GSTU11)	Encodes glutathione transferase belonging to the tau class of GSTs. Naming convention according to Wagner et al. (2002).
474	AT1G70130	L-TYPE LECTIN RECEPTOR KINASE V.2 (LECRK-V.2)	Concanavalin A-like lectin protein kinase family protein
475	AT1G70210	CYCLIN D1;1 (CYCD1;1)	Encodes a D-type cyclin that physically interacts with CDC2A. Its expression is upregulated early during germination.
476	AT1G70290	TREHALOSE-6-PHOSPHATASE SYNTHASE S8 (TPS8)	Encodes an enzyme putatively involved in trehalose biosynthesis. Though the protein has both trehalose-6-phosphate synthase (TPS)-like and trehalose-6-phosphate phosphatase (TPP)-like domains, neither activity has been detected in enzymatic assays nor has the protein been able to complement yeast TPS or TPP mutants.
477	AT1G70410	BETA CARBONIC ANHYDRASE 4 (BCA4)	Encodes a putative beta-carbonic anhydrase betaCA4. Together with betaCA1 (At3g01500) regulates CO2-controlled stomatal movements in guard cells, as well as attenuates immunity. Differential CA gene expression in response to changing atmospheric CO2 conditions contribute to altered disease resistance levels.
478	AT1G70460	PROLINE-RICH EXTENSIN-LIKE RECEPTOR KINASE 13 (PERK13)	Encodes a member of the proline-rich extensin-like receptor kinase (PERK) family. This family consists of 15 predicted receptor kinases (PMID: 15653807).
479	AT1G70700	(TIFY7)	JAZ9 is a protein presumed to be involved in jasmonate signaling. JAZ9 transcript levels rise in response to a jasmonate stimulus. JAZ9 can interact with the COI1 F-box subunit of an SCF E3 ubiquitin ligase in a yeast-two-hybrid assay only in the presence of jasmonate-isoleucine (JA-ILE) or coronatine. The Jas domain appears to be important for JAZ9-COI1 interactions in the presence of coronatine…
480	AT1G70850	MLP-LIKE PROTEIN 34 (MLP34)	MLP-like protein 34
481	AT1G70890	MLP-LIKE PROTEIN 43 (MLP43)	MLP-like protein 43
482	AT1G70990	EXTENSIN 33 (EXT33)	Short extensin family protein required during the first phase of dark-grown hypocotyl elongation, regulates the moment and extent of the growth acceleration by modulating cell wall extensibility.
483	AT1G71000		Chaperone DnaJ-domain superfamily protein
484	AT1G71080		RNA polymerase II transcription elongation factor
485	AT1G71140	PROTEIN DETOXIFICATION 14 (DTX14)	MATE transporter that can export the antibiotic norfloxacin.
486	AT1G71400	RECEPTOR LIKE PROTEIN 12 (RLP12)	Encodes a CLAVATA2 (CLV2)-related gene. Complements the clv2 mutant when expressed under the control of the CLV2 promoter. The mRNA is cell-to-cell mobile.
487	AT1G71690		glucuronoxylan 4-O-methyltransferase-like protein (DUF579)
488	AT1G71691		GDSL-motif esterase/acyltransferase/lipase. Enzyme group with broad substrate specificity that may catalyze acyltransfer or hydrolase reactions with lipid and non-lipid substrates.
489	AT1G71970		hypothetical protein
490	AT1G72030	GCN5&#8208;RELATED N&#8208;ACETYLTRANSFERASE 10 (GNAT10)	Acyl-CoA N-acyltransferases (NAT) superfamily protein
491	AT1G72100		late embryogenesis abundant domain-containing protein / LEA domain-containing protein
492	AT1G72180	C-TERMINALLY ENCODED PEPTIDE RECEPTOR 2 (CEPR2)	Encodes a leucine-rich repeat receptor kinase that functions as a receptor for CEP1 peptide. Mediates nitrate uptake signaling.
493	AT1G72220	ARABIDOPSIS T??XICOS EN LEVADURA 54 (ATL54)	RING/U-box superfamily protein
494	AT1G72450	JASMONATE-ZIM-DOMAIN PROTEIN 6 (JAZ6)	JAZ6 transcript levels rise in response to a jasmonate stimulus and a GFP:JAZ6 fusion protein localizes to the nucleus. Application of jasmonate methyl ester to Arabidopsis roots reduces the levels of a JAZ6:GUS fusion protein, presumably by stimulating ubiquitin-proteasome-mediated degradation.
495	AT1G72490	DEEPER ROOTING 1 (DRO1)	DRO1 is a member of the IGT gene family and has a unknown function . It is expressed in roots and involved in leaf root architecture, specifically the orientation of lateral root angles. Involved in determining lateral root branch angle.
496	AT1G72510		DUF1677 family protein (DUF1677)
497	AT1G72800		RNA-binding (RRM/RBD/RNP motifs) family protein
498	AT1G72870	TIR-NBS5 (TN5)	TIR-NBS gene.
499	AT1G72900	TIR-NBS7 (TN7)	Toll-Interleukin-Resistance (TIR) domain-containing protein
500	AT1G72940	TIR-NBS11 (TN11)	Nucleotide-binding, leucine-rich repeat (NLR) gene regulated by nonsense-mediated mRNA decay (NMD) genes UPF1 and UPF3.
501	AT1G73260	KUNITZ TRYPSIN INHIBITOR 1 (KTI1)	Encodes a trypsin inhibitor involved in modulating programmed cell death in plant-pathogen interactions.
502	AT1G73330	DROUGHT-REPRESSED 4 (DR4)	encodes a plant-specific protease inhibitor-like protein whose transcript level in root disappears in response to progressive drought stress. The decrease in transcript level is independent from abscisic acid level.
503	AT1G73340	ABIETANE DITERPENE OXIDASE 1 (ADTO1)	ADTO1 is required for the activation of systemic acquired resistance.
504	AT1G73370	SUCROSE SYNTHASE 6 (SUS6)	Encodes a protein with sucrose synthase activity (SUS6).
505	AT1G73600	(NMT3)	Encodes a S-adenosyl-L-methionine-dependent phosphoethanolamine N-methyltransferase whose expression is responsive to both phosphate (Pi) and phosphite (Phi) in roots. It catalyzes the three sequential P-base methylation of phosphoethanolamine to phosphocholine. Homologous biochemical function to NMT1 (At3g18000). Double mutants of NMT1 and NMT3 are defective in leaf, root, flower, seed, and poll…
506	AT1G73620		Pathogenesis-related thaumatin superfamily protein
507	AT1G74010		Calcium-dependent phosphotriesterase superfamily protein
508	AT1G74055		transmembrane protein
509	AT1G74070		Cyclophilin-like peptidyl-prolyl cis-trans isomerase family protein
510	AT1G74090	DESULFO-GLUCOSINOLATE SULFOTRANSFERASE 18 (SOT18)	encodes a desulfoglucosinolate sulfotransferase, involved in the final step of glucosinolate core structure biosynthesis. Has a broad-substrate specificity with preference with methionine-derived desulfoglucosinolates.
511	AT1G74420	FUCOSYLTRANSFERASE 3 (FUT3)	Predicted fucosyltransferase, based on similarity to FUT1, but not functionally redundantwith FUT1.
512	AT1G74470		Encodes for a multifunctional protein with geranylgeranyl reductase activity shown to catalyze the reduction of prenylated geranylgeranyl-chlorophyll a to phytyl-chlorophyll a (chlorophyll a) and free geranylgeranyl pyrophosphate to phytyl pyrophosphate. The mRNA is cell-to-cell mobile.
513	AT1G74490	PBS1-LIKE 29 (PBL29)	Protein kinase superfamily protein
514	AT1G74500	ACTIVATION-TAGGED BRI1(BRASSINOSTEROID-INSENSITIVE 1)-SUPPRESSOR 1 (BS1)	Encodes a basic helix/loop/helix transcription factor that acts downstream of MP in root initiation. TMO7 protein moves to the hypophysis and to vascular cells, contributing to MP-dependent root formation. Promotes the correct definition of the hypophysis cell division plane.
515	AT1G74580		Pentatricopeptide repeat (PPR) superfamily protein
516	AT1G74590	GLUTATHIONE S-TRANSFERASE TAU 10 (GSTU10)	Encodes glutathione transferase belonging to the tau class of GSTs. Naming convention according to Wagner et al. (2002).
517	AT1G74620		RING/U-box superfamily protein
518	AT1G74730	(RIQ2)	Encodes a grana core localized protein, is homologous to RIG1. Mutant plants have reduced NPQ, affected organization of light-havesting complex II and an enhanced grana stacking.
519	AT1G74940		cyclin-dependent kinase, putative (DUF581)
520	AT1G75160	BOUNDARY OF ROP DOMAIN9 (BDR9)	DUF620 family protein (DUF620)
521	AT1G75280		isoflavone reductase, putative, identical to SP:P52577 Isoflavone reductase homolog P3 (EC 1.3.1.-) {Arabidopsis thaliana}; contains Pfam profile PF02716: isoflavone reductase. Involved in response to oxidative stress. The mRNA is cell-to-cell mobile.
522	AT1G75300		encodes a protein whose sequence is similar to an isoflavone reductase
523	AT1G75450	CYTOKININ OXIDASE 5 (CKX5)	This gene used to be called AtCKX6. It encodes a protein whose sequence is similar to cytokinin oxidase/dehydrogenase, which catalyzes the degradation of cytokinins.
524	AT1G75460		ATP-dependent protease La (LON) domain protein
525	AT1G75670		DNA-directed RNA polymerase
526	AT1G75690	LOW QUANTUM YIELD OF PHOTOSYSTEM II 1 (LQY1)	Thylakoid Thiol/Disulfide-Modulating Protein.
527	AT1G75710		C2H2-like zinc finger protein
528	AT1G75720		WEB family protein (DUF827)
529	AT1G75750	GAST1 PROTEIN HOMOLOG 1 (GASA1)	GA-responsive GAST1 protein homolog regulated by BR and GA antagonistically. Possibly involved in cell elongation based on expression data The mRNA is cell-to-cell mobile.
530	AT1G75790	SKU5 SIMILAR 18 (sks18)	SKU5 similar 18
531	AT1G75830	LOW-MOLECULAR-WEIGHT CYSTEINE-RICH 67 (LCR67)	Predicted to encode a PR (pathogenesis-related) protein. Belongs to the plant defensin (PDF) family with the following members: At1g75830/PDF1.1, At5g44420/PDF1.2a, At2g26020/PDF1.2b, At5g44430/PDF1.2c, At2g26010/PDF1.3, At1g19610/PDF1.4, At1g55010/PDF1.5, At2g02120/PDF2.1, At2g02100/PDF2.2, At2g02130/PDF2.3, At1g61070/PDF2.4, At5g63660/PDF2.5, At2g02140/PDF2.6, At5g38330/PDF3.1 and At4g30070/PDF…
532	AT1G76070		hypothetical protein
533	AT1G76100	PLASTOCYANIN 1 (PETE1)	One of two Arabidopsis plastocyanin genes. Expressed at 1/10th level of PETE2. Does not respond to increased copper levels and is thought to be the isoform that participates in electron transport under copper-limiting conditions. Mutation of this gene does not have obvious effect on photosynthesis.
534	AT1G76410	(ATL8)	RING/U-box superfamily protein
535	AT1G76470		NAD(P)-binding Rossmann-fold superfamily protein
536	AT1G76520	PIN-LIKES 3 (PILS3)	Auxin efflux carrier family protein
537	AT1G76590	(PLATZ2)	PLATZ transcription factor family protein
538	AT1G76600		PADRE protein up-regulated after infection by S. sclerotiorun.
539	AT1G76650	CALMODULIN-LIKE 38 (CML38)	calmodulin-like 38
540	AT1G76790	INDOLE GLUCOSINOLATE O-METHYLTRANSFERASE 5 (IGMT5)	Encodes a protein with similarity to N-acetylserotonin O-methyltransferase (ASMT) but it does not have ASMT activity in vitro.
541	AT1G76870		transcription factor
542	AT1G76990	ACT DOMAIN REPEAT 3 (ACR3)	ACT domain repeat 3
543	AT1G77000	(SKP2B)	AtSKP2;2 is a homolog of human SKP2, the human F-box protein that recruits E2F1. Contains an F-box motif at the N-terminal region and a C-terminal Leu-rich repeat domain. Forms part of an E3-ubiquitin-ligase SCF (Skp1, cullin, F-box) complex and recruits phosphorylated AtE2Fc, a transcriptional factor that might play a role in cell division and during the transition from skotomorphogenesis to pho…
544	AT1G77020		DNAJ heat shock N-terminal domain-containing protein
545	AT1G77060		Phosphoenolpyruvate carboxylase family protein
546	AT1G77200		encodes a member of the DREB subfamily A-4 of ERF/AP2 transcription factor family. The protein contains one AP2 domain. There are 17 members in this subfamily including TINY.
547	AT1G77380	AMINO ACID PERMEASE 3 (AAP3)	Amino acid permease which transports basic amino acids.
548	AT1G77530		O-methyltransferase family protein
549	AT1G77590	LONG CHAIN ACYL-COA SYNTHETASE 9 (LACS9)	Encodes major plastidic long chain acyl-CoA synthetase with a slight substrate preference of oleic acid over any of the other fatty acids.
550	AT1G77640		encodes a member of the DREB subfamily A-5 of ERF/AP2 transcription factor family. The protein contains one AP2 domain. There are 15 members in this subfamily including RAP2.1, RAP2.9 and RAP2.10.
551	AT1G77690	LIKE AUX1 3 (LAX3)	Encodes an auxin influx carrier LAX3 (Like Aux1) that promotes lateral root emergence. Auxin-induced expression of LAX3 in turn induces a selection of cell-wall-remodelling enzymes, which are likely to promote cell separation in advance of developing lateral root primordia.
552	AT1G77700	UBIQUITIN FOLD MODIFIER 1 (UFM1)	Osmotin-like protein.
553	AT1G77920	TGACG SEQUENCE-SPECIFIC BINDING PROTEIN 7 (TGA7)	bZIP transcription factor family protein
554	AT1G78100	AUXIN UP-REGULATED F-BOX PROTEIN 1 (AUF1)	F-box family protein
555	AT1G78120	TETRATRICOPEPTIDE REPEAT 12 (TPR12)	Encodes one of the 36 carboxylate clamp (CC)-tetratricopeptide repeat (TPR) proteins (Prasad 2010, Pubmed ID: 20856808) with potential to interact with Hsp90/Hsp70 as co-chaperones.
556	AT1G78170		E3 ubiquitin-protein ligase
557	AT1G78210		alpha/beta-Hydrolases superfamily protein
558	AT1G78290	SNF1-RELATED PROTEIN KINASE 2-8 (SNRK2-8)	encodes a member of SNF1-related protein kinase (SnRK2) family whose activity is activated by ionic (salt) and non-ionic (mannitol) osmotic stress and dehydration.
559	AT1G78370	GLUTATHIONE S-TRANSFERASE TAU 20 (GSTU20)	Encodes glutathione transferase belonging to the tau class of GSTs. Naming convention according to Wagner et al. (2002).
560	AT1G78430	ROP INTERACTIVE PARTNER 2 (RIP2)	Encodes RIP2 (ROP interactive partner 2), a putative Rho protein effector, interacting specifically with the active form of ROPs (Rho proteins of plants).
561	AT1G78670	GAMMA-GLUTAMYL HYDROLASE 3 (GGH3)	gamma-glutamyl hydrolase 3
562	AT1G78780		pathogenesis-related family protein
563	AT1G78815	LIGHT SENSITIVE HYPOCOTYLS 7 (LSH7)	LIGHT-DEPENDENT SHORT HYPOCOTYLS-like protein (DUF640)
564	AT1G78860	APPLE DOMAIN LECTIN-2 (GAL2)	curculin-like (mannose-binding) lectin family protein, low similarity to Ser/Thr protein kinase (Zea mays) GI:2598067; contains Pfam profile PF01453: Lectin (probable mannose binding) but not the protein kinase domain of the Z. mays protein
565	AT1G78940		kinase with adenine nucleotide alpha hydrolases-like domain-containing protein
566	AT1G78970	LUPEOL SYNTHASE 1 (LUP1)	Lupeol synthase. Converts oxidosqualene to multiple triterpene alcohols and a triterpene diols. This conversion proceeds through the formation of a 17&#946;-dammarenyl cation.
567	AT1G79040	PHOTOSYSTEM II SUBUNIT R (PSBR)	Encodes for the 10 kDa PsbR subunit of photosystem II (PSII). This subunit appears to be involved in the stable assembly of PSII, particularly that of the oxygen-evolving complex subunit PsbP. Mutants defective in this gene have reduced amounts of subunits PsbP and PsbQ in PSII. In turn, assembly of PsbR is dependent on the presence of PsbJ.
568	AT1G79110	BOI-RELATED GENE 2 (BRG2)	Encodes one of the BRGs (BOI-related gene) involved in resistance to Botrytis cinerea.
569	AT1G79140
570	AT1G79360	ORGANIC CATION/CARNITINE TRANSPORTER 2 (OCT2)	organic cation/carnitine transporter 2
571	AT1G79520		Cation efflux family protein
572	AT1G79580	SOMBRERO (SMB)	NAC-domain protein. Involved in root cap development. Involved in a regulatory feedback loop with FEZ. FEZ activates SMB in hte root cap daughter cells soon after division, and SMB in turn represses FEZ expression in these cells, thereby preventing further stem cell divisions.
573	AT1G79620	VASCULAR-RELATED RLK 1 (VRLK1)	VRLK1 is a LRR kinase involved in switching between cell elongation and secondary cell wall thickening.VRLK1 is a member of a gene family that includes a small number of recently duplicated paralogs.
574	AT1G79850	RIBOSOMAL PROTEIN S17 (RPS17)	nuclear-encoded 30S chloroplast ribosomal protein S17
575	AT1G79990		coatomer subunit beta-2
576	AT1G80080	TOO MANY MOUTHS (TMM)	Encodes a transmembrane leucine-repeat containing receptor-like protein that is expressed in proliferative postprotodermal cells. Recessive mutation leads to disruption of asymmetric cell division during stomata development. Its transcript levels change after inducing MUTE expression in a mute background.
577	AT1G80160	GLYOXYLASE I 7 (GLYI7)	Vicinal oxygen chelate (VOC) superfamily member.
578	AT1G80170		Pectin lyase-like superfamily protein
579	AT1G80240	DUF642 L-GALL RESPONSIVE GENE 1 (DGR1)	DUF642 gene
580	AT1G80270	PENTATRICOPEPTIDE REPEAT 596 (PPR596)	PENTATRICOPEPTIDE REPEAT 596
581	AT1G80290		a member of the Glycosyltransferase Family 64 (according to CAZy Database)
582	AT1G80330	GIBBERELLIN 3-OXIDASE 4 (GA3OX4)	Encodes a protein with gibberellin 3-oxidase activity. The enzyme, expressed and purified in E.coli, was shown to catalyze the 3&#946;-hydroxylation of GA20 into GA29.
583	AT1G80340	GIBBERELLIN 3-OXIDASE 2 (GA3OX2)	Encodes a protein with gibberellin 3 &#946;-hydroxylase activity. The protein was heterologously expressed in E. coli and shown to catalyze the hydroxylation of both GA9 and GA20.
584	AT1G80550		Pentatricopeptide repeat (PPR) superfamily protein
585	AT1G80720		Mitochondrial glycoprotein family protein
586	AT1G80760	NOD26-LIKE INTRINSIC PROTEIN 6;1 (NIP6;1)	Encodes a protein with boron transporter activity. It helps to preferentially direct boron to young developing tissues in the shoot, such as immature leaves, under low boron conditions. This boron channel appears to be impermeable to water, unlike the closely related NIP5;1 boron transporter. This protein also allows the transport of glycerol, urea, and formimide but not larger uncharged solutes …
587	AT1G80820	CINNAMOYL COA REDUCTASE (CCR2)	Encodes an cinnamoyl CoA reductase isoform. Involved in lignin biosynthesis.
588	AT1G80970		XH domain-containing protein
589	AT2G01120	ORIGIN RECOGNITION COMPLEX SUBUNIT 4 (ORC4)	Origin Recognition Complex subunit 4. Involved in the initiation of DNA replication. Regulated transcriptionally during cell cycle, peaking at G1/S-phase. Target of E2F/DF family of transcription factors. Interacts with all ORC subunits except ORC1b.
590	AT2G01210	ZYGOTIC ARREST 1 (ZAR1)	ZAR1 encodes a plasma membrane localized leucine-rich repeat receptor-like kinase (LRR-RLK) that contains a putative CaM-binding domain and a G&#946;-binding motif within its intracellular kinase region. Homozygous of function mutations are embryo-lethal and fail to properly make the first asymmetric division of the zygote. ZAR1 interacts with both CaM and G&#946; in vivo and that interaction act…
591	AT2G01420	PIN-FORMED 4 (PIN4)	Encodes a putative auxin efflux carrier that is localized in developing and mature root meristems. It is involved in the maintenance of embryonic auxin gradients. A role for AtPIN4 in generating a sink for auxin below the quiescent center of the root meristem that is essential for auxin distribution and patterning is proposed. In the root, PIN4 is detected around the quiescent center and cells su…
592	AT2G01430	HOMEOBOX-LEUCINE ZIPPER PROTEIN 17 (HB17)	ATHB17 is a member of the HD-Zip transcription factor family. It is expressed most strongly in roots at different stages of development and induced by ABA, paraquat, drought, and NaCl treatments. Loss of function mutants are more sensitive to salt and drought stress.The protein is nuclear localized and has been shown to bind to the promoter of SIG5 and other genes.
593	AT2G01770	VACUOLAR IRON TRANSPORTER 1 (VIT1)	Encodes an iron transporter required for iron sequestration into vacuoles. Expressed in developing embryo and seed. Localized in the vacuolar membrane.
594	AT2G01890	PURPLE ACID PHOSPHATASE 8 (PAP8)	Encodes a purple acid phosphatase (PAP) belonging to the low molecular weight plant PAP group.
595	AT2G02390	GLUTATHIONE S-TRANSFERASE ZETA 1 (GSTZ1)	Encodes glutathione transferase belonging to the zeta class of GSTs. Naming convention according to Wagner et al. (2002). The protein undergoes spontaneous thiolation following treatment with the oxidant tert-butylhydroperoxide. It functions in vitro as a maleylacetoacetate isomerase and is likely to be involved in tyrosine catabolism.
596	AT2G02400		NAD(P)-binding Rossmann-fold superfamily protein
597	AT2G02540	HOMEOBOX PROTEIN 21 (HB21)	Zinc finger homeobox protein. Expressed in vascular tissue. In a yeast one hybrid system was not able to transactivate a reporter gene.
598	AT2G02780		Leucine-rich repeat protein kinase family protein
599	AT2G02850	PLANTACYANIN (ARPN)	Encodes plantacyanin one of blue copper proteins. Involved in anther development and pollination. Expressed in the transmitting tract of the pistil.
600	AT2G02990	RIBONUCLEASE 1 (RNS1)	Encodes a member of the ribonuclease T2 family that responds to inorganic phosphate starvation, and inhibits production of anthocyanin. Also involved in wound-induced signaling independent of jasmonic acid. Its expression is responsive to both phosphate (Pi) and phosphite (Phi) in roots.
601	AT2G03060	AGAMOUS-LIKE 30 (AGL30)	Encodes a member of the MIKC (MADS box, Keratin binding domain, and C terminal domain containing )family of transcriptional regulators. AGL30 is expressed in pollen.It forms heterodimers with other MICK family members.
602	AT2G03090	EXPANSIN A15 (EXPA15)	member of Alpha-Expansin Gene Family. Naming convention from the Expansin Working Group (Kende et al, 2004. Plant Mol Bio). Involved in the formation of nematode-induced syncytia in roots of Arabidopsis thaliana.
603	AT2G03260		EXS (ERD1/XPR1/SYG1) family protein
604	AT2G03730	ACT DOMAIN REPEAT 5 (ACR5)	Member of a small family of ACT domain containing proteins. ACT domains are thought to be involved in amino acid binding.
605	AT2G03750		P-loop containing nucleoside triphosphate hydrolases superfamily protein
606	AT2G03760	SULPHOTRANSFERASE 12 (SOT12)	Encodes a brassinosteroid sulfotransferase. In vitro experiements show that this enzyme has a preference for 24-epibrassinosteroids, particularly 24-epicathasterone, but does not act on castasterone and brassinolide. It also shows sulfating activity toward flavonoids. It is differentially expressed during development, being more abundant in young seedlings and actively growing cell cultures. Expr…
607	AT2G03830	ROOT MERISTEM GROWTH FACTOR 8 (RGF8)	Encodes a root meristem growth factor (RGF). Belongs to a family of functionally redundant homologous peptides that are secreted, tyrosine-sulfated, and expressed mainly in the stem cell area and the innermost layer of central columella cells. RGFs are required for maintenance of the root stem cell niche and transit amplifying cell proliferation. Members of this family include: At5g60810 (RGF1), …
608	AT2G04025	ROOT MERISTEM GROWTH FACTOR 3 (RGF3)	Encodes a root meristem growth factor (RGF). Belongs to a family of functionally redundant homologous peptides that are secreted, tyrosine-sulfated, and expressed mainly in the stem cell area and the innermost layer of central columella cells. RGFs are required for maintenance of the root stem cell niche and transit amplifying cell proliferation. Members of this family include: At5g60810 (RGF1), …
609	AT2G04040	DETOXIFICATION 1 (DTX1)	AtDTX1 (At2g04040) has been identified as a detoxifying efflux carrier for plant-derived antibiotics and other toxic compounds, including Cd2+. Expression in rosette leaves is activated by high concentration of boron.Mistakenly referred to as At2g04070 in PMID:11739388.
610	AT2G04080		MATE efflux family protein
611	AT2G04160	AUXIN-INDUCED IN ROOT CULTURES 3 (AIR3)	isolated from differential screening of a cDNA library from auxin-treated root culture. encodes a protein similar to subtilisin-like serine protease which is believed to be active outside the plant cell.
612	AT2G04480		hypothetical protein
613	AT2G04795		hypothetical protein
614	AT2G04850		Auxin-responsive family protein
615	AT2G05380	GLYCINE-RICH PROTEIN 3 SHORT ISOFORM (GRP3S)	glycine-rich protein 3 short isoform (GRP3S) mRNA, complete The mRNA is cell-to-cell mobile.
616	AT2G05510		Glycine-rich protein family
617	AT2G05560		transposable_element_gene;pseudogene, Ulp1 protease family, contains Pfam profile PF02902: Ulp1 protease family, C-terminal catalytic domain;(source:TAIR10)
618	AT2G05950		transposable_element_gene;similar to unknown protein [Arabidopsis thaliana] (TAIR:AT3G32050.1);(source:TAIR10)
619	AT2G06050	OXOPHYTODIENOATE-REDUCTASE 3 (OPR3)	Encodes a 12-oxophytodienoate reductase that is required for jasmonate biosynthesis. Mutants are male sterile and defective in pollen dehiscence. Shows activity towards 2,4,6-trinitrotoluene. CFA-Ile, CFA-Leu, CFA-Val, CFA-Met and CFA-Ala can restore the fertility of opr3 plants by inducing filament elongation and anther dehiscence.
620	AT2G06490		transposable_element_gene;CACTA-like transposase family (Ptta/En/Spm), has a 7.5e-83 P-value blast match to At5g29026.1/8-244 CACTA-like transposase family (Ptta/En/Spm) (CACTA-element) (Arabidopsis thaliana);(source:TAIR10)
621	AT2G06850	XYLOGLUCAN ENDOTRANSGLUCOSYLASE/HYDROLASE 4 (XTH4)	endoxyloglucan transferase (EXGT-A1) gene
622	AT2G07620		transposable_element_gene;pseudogene, similar to putative helicase, very low similarity to SP|Q9UUA2 DNA repair and recombination protein pif1, mitochondrial precursor {Schizosaccharomyces pombe};(source:TAIR10)
623	AT2G07692		hypothetical protein
624	AT2G07698		ATPase, F1 complex, alpha subunit protein
625	AT2G07700		transposable_element_gene;gypsy-like retrotransposon family, has a 4.7e-21 P-value blast match to GB:226407 retrotransposon del1-46 (Gypsy_Ty3-element) (Lilium henryi);(source:TAIR10)
626	AT2G07701		hypothetical protein
627	AT2G07702		hypothetical protein
628	AT2G07722		transmembrane protein
629	AT2G07728		hypothetical protein
630	AT2G07750		DEA(D/H)-box RNA helicase family protein
631	AT2G10140		transposable_element_gene;CACTA-like transposase family (Tnp2/En/Spm), has a 1.7e-140 P-value blast match to GB:CAA40555 TNP2 (CACTA-element) (Antirrhinum majus);(source:TAIR10)
632	AT2G10940		Bifunctional inhibitor/lipid-transfer protein/seed storage 2S albumin superfamily protein
633	AT2G10970		Plant invertase/pectin methylesterase inhibitor superfamily protein
634	AT2G12170		hypothetical protein
635	AT2G12870		transposable_element_gene;gypsy-like retrotransposon family, has a 3.8e-07 P-value blast match to GB:AAD19359 polyprotein (gypsy_Ty3-element) (Sorghum bicolor);(source:TAIR10)
636	AT2G13610	ATP-BINDING CASSETTE G5 (ABCG5)	ABC-2 type transporter family protein
637	AT2G13690		PRLI-interacting factor
638	AT2G13780
639	AT2G14520		CBS domain protein (DUF21)
640	AT2G14550		pseudogene of RNA-binding (RRM/RBD/RNP motifs) family protein
641	AT2G14560	LATE UPREGULATED IN RESPONSE TO HYALOPERONOSPORA PARASITICA (LURP1)	Encodes LURP1, a member of the LURP cluster (late upregulated in response to Hyaloperonospora parasitica) which exhibits a pronounced upregulation after recognition of the pathogenic oomycte H. parasitica. LURP1 is required for full basal defense to H. parasitica and resistance to this pathogen mediated by the R-proteins RPP4 and RPP5. The mRNA is cell-to-cell mobile.
642	AT2G14620	XYLOGLUCAN ENDOTRANSGLUCOSYLASE/HYDROLASE 10 (XTH10)	xyloglucan endotransglucosylase/hydrolase 10
643	AT2G14960	(GH3.1)	encodes a protein similar to IAA-amido synthases. Lines carrying an insertion in this gene are hypersensitive to auxin.
644	AT2G15000		caspase-6 protein
645	AT2G15020		hypothetical protein
646	AT2G15480	UDP-GLUCOSYL TRANSFERASE 73B5 (UGT73B5)	UDP-glucosyl transferase 73B5
647	AT2G15490	UDP-GLYCOSYLTRANSFERASE 73B4 (UGT73B4)	UDP-glycosyltransferase 73B4
648	AT2G15580		RING/U-box superfamily protein
649	AT2G15620	NITRITE REDUCTASE 1 (NIR1)	Involved in the second step of nitrate assimilation. Its expression is induced by nitrate. The mRNA is cell-to-cell mobile.
650	AT2G15630		Pentatricopeptide repeat (PPR) superfamily protein
651	AT2G15890	MATERNAL EFFECT EMBRYO ARREST 14 (MEE14)	Encodes CBP1, a regulator of transcription initiation in central cell-mediated pollen tube guidance.
652	AT2G16060	HEMOGLOBIN 1 (HB1)	Encodes a class 1 nonsymbiotic hemoglobin induced by low oxygen levels with very high oxygen affinity. It is not likely to be a hemoglobin transporter because of its extremely high affinity for oxygen. Overexpression impairs cold stress-induced nitric oxide (NO) production.
653	AT2G16190		hypothetical protein
654	AT2G16230		O-Glycosyl hydrolases family 17 protein
655	AT2G16570	GLN PHOSPHORIBOSYL PYROPHOSPHATE AMIDOTRANSFERASE 1 (ASE1)	Amidophosphoribosyltransferase (ATase: EC 2.4.2.14) is a key enzyme in the pathway of purine nucleotide biosynthesis
656	AT2G16740	UBIQUITIN-CONJUGATING ENZYME 29 (UBC29)	ubiquitin-conjugating enzyme 29
657	AT2G16750		kinase with adenine nucleotide alpha hydrolases-like domain-containing protein
658	AT2G16760		Calcium-dependent phosphotriesterase superfamily protein
659	AT2G16990		Major facilitator superfamily protein
660	AT2G17160		Interleukin-1 receptor-associated kinase 4 protein
661	AT2G17230	EXORDIUM LIKE 5 (EXL5)	EXORDIUM like 5
662	AT2G17280		Phosphoglycerate mutase family protein
663	AT2G17290	CALCIUM DEPENDENT PROTEIN KINASE 6 (CPK6)	Encodes calcium dependent protein kinase 6 (CPK6), a member of the Arabidopsis CDPK gene family. CDPKs contain an intrinsic Ca2+-activation domain with four EF hand Ca2+-binding sites. CDPKs protein kinases have been proposed to function in multiple plant signal transduction pathways downstream of [Ca2+]cyt elevations, thus transducing various physiological responses. CPK6 is expressed in both gu…
664	AT2G17490		transposable_element_gene;copia-like retrotransposon family, has a 9.3e-199 P-value blast match to gb|AAO73521.1| gag-pol polyprotein (Glycine max) (SIRE1) (Ty1_Copia-family);(source:TAIR10)
665	AT2G17500	PIN-LIKES 5 (PILS5)	Auxin efflux carrier family protein
666	AT2G17610		transposable_element_gene;non-LTR retrotransposon family (LINE), has a 3.6e-21 P-value blast match to GB:AAA39398 ORF2 (Mus musculus) (LINE-element);(source:TAIR10)
667	AT2G17650		AMP-dependent synthetase and ligase family protein
668	AT2G17660		RPM1-interacting protein 4 (RIN4) family protein
669	AT2G17850		Rhodanese/Cell cycle control phosphatase superfamily protein
670	AT2G17880	DNA J PROTEIN C24 (DJC24)	Chaperone DnaJ-domain superfamily protein
671	AT2G18010	SMALL AUXIN UPREGULATED RNA 10 (SAUR10)	SAUR-like auxin-responsive protein family
672	AT2G18140		Peroxidase superfamily protein
673	AT2G18210		hypothetical protein
674	AT2G19110	HEAVY METAL ATPASE 4 (HMA4)	Encodes a protein with similarity to Zn ATPase. Can rescue Zn deficiency in yeast and Cd resistance, suggesting a role in Zn and Cd transport. The mRNA is cell-to-cell mobile.
675	AT2G19200		pseudogene of hypothetical protein (DUF626)
676	AT2G19500	CYTOKININ OXIDASE 2 (CKX2)	It encodes a protein whose sequence is similar to cytokinin oxidase/dehydrogenase, which catalyzes the degradation of cytokinins.
677	AT2G19630		F-box and associated interaction domains-containing protein
678	AT2G19650		Cysteine/Histidine-rich C1 domain family protein
679	AT2G19670	PROTEIN ARGININE METHYLTRANSFERASE 1A (PRMT1A)	protein arginine methyltransferase 1A
680	AT2G19800	MYO-INOSITOL OXYGENASE 2 (MIOX2)	Encodes a myo-inositol oxygenase family gene.
681	AT2G19850		transcription repressor
682	AT2G19890		hypothetical protein
683	AT2G19900	NADP-MALIC ENZYME 1 (NADP-ME1)	The malic enzyme (EC 1.1.1.40) encoded by AtNADP-ME1 is expressed in response to developmental and cell-specific signals. The enzyme is active in vitro and appears to function as a homohexamer or homooctamer. It is believed to be a cytosolic protein.
684	AT2G19990	PATHOGENESIS-RELATED PROTEIN-1-LIKE (PR-1-LIKE)	Encodes a PR-1-like protein homolog that is differentially expressed in resistant compared to susceptible cultivars by powdery mildew infection. The deduced amino acid sequence has 24 amino acids comprising the signal peptide and 140 amino acids of the mature peptide (15 kDa). Northern blot analysis showed accumulation of the corresponding mRNA 12 h after inoculation of resistant barley cultivars…
685	AT2G20030	ARABIDOPSIS T??XICOS EN LEVADURA 12 (ATL12)	RING/U-box superfamily protein
686	AT2G20260	PHOTOSYSTEM I SUBUNIT E-2 (PSAE-2)	Encodes subunit E of photosystem I. The mRNA is cell-to-cell mobile.
687	AT2G20570	GBF'S PRO-RICH REGION-INTERACTING FACTOR 1 (GPRI1)	Encodes GLK1, Golden2-like 1, one of a pair of partially redundant nuclear transcription factors that regulate chloroplast development in a cell-autonomous manner. GLK2, Golden2-like 2, is encoded by At5g44190. GLK1 and GLK2 regulate the expression of the photosynthetic apparatus. GLK1 is also a member of the GARP transcription factor family.
688	AT2G20670		sugar phosphate exchanger, putative (DUF506)
689	AT2G20780		Major facilitator superfamily protein
690	AT2G20800	NAD(P)H DEHYDROGENASE B4 (NDB4)	NAD(P)H dehydrogenase B4
691	AT2G20830		folic acid binding / transferase
692	AT2G20940		transmembrane protein, putative (DUF1279)
693	AT2G21130		Cyclophilin-like peptidyl-prolyl cis-trans isomerase family protein
694	AT2G21185		transmembrane protein
695	AT2G21300		ATP binding microtubule motor family protein
696	AT2G21330	FRUCTOSE-BISPHOSPHATE ALDOLASE 1 (FBA1)	fructose-bisphosphate aldolase 1
697	AT2G21530		SMAD/FHA domain-containing protein
698	AT2G21540	SEC14-LIKE 3 (SFH3)	SEC14-like 3
699	AT2G21560		nucleolar-like protein
700	AT2G21640		Encodes a protein of unknown function that is a marker for oxidative stress response.Expression in rosette leaves is activated by high concentration of boron.
701	AT2G21950	SKP1 INTERACTING PARTNER 6 (SKIP6)	Encodes an SKP1 interacting partner (SKIP6).
702	AT2G21960		transmembrane protein
703	AT2G22000	ELICITOR PEPTIDE 6 PRECURSOR (PROPEP6)	elicitor peptide 6 precursor
704	AT2G22230		Thioesterase superfamily protein
705	AT2G22240	MYO-INOSITOL-1-PHOSPHATE SYNTHASE 2 (MIPS2)	** Referred to as MIPS1 in Mitsuhashi et al 2008. Myo-inositol-1-phosphate synthase isoform 2. Expressed in leaf, root and silique. Immunolocalization experiments with an antibody recognizing MIPS1, MIPS2, and MIPS3 showed endosperm localization.
706	AT2G22430	HOMEOBOX PROTEIN 6 (HB6)	Encodes a homeodomain leucine zipper class I (HD-Zip I) protein that is a target of the protein phosphatase ABI1 and regulates hormone responses in Arabidopsis.
707	AT2G22440		Frigida like gene.
708	AT2G22470	ARABINOGALACTAN PROTEIN 2 (AGP2)	Encodes arabinogalactan-protein (AGP2).
709	AT2G22490	CYCLIN D2;1 (CYCD2;1)	encodes a D-type cyclin whose transcription level is regulated by sucrose but not phytohormones or nitrate. Protein physically interacts with CDC2A. CycD2 kinase activity is regulated by sequestration of CycD2 protein in a form inaccessible to immunoprecipitation and probably not complexed to CDC2A.
710	AT2G22550
711	AT2G22610	MALECTIN DOMAIN KINESIN 2 (MDKIN2)	Malectin domain kinesin. Possible role in cell division, with a possible secondary function in the nuclei.
712	AT2G22620	RHAMNOGALACTURONAN LYASE6 (RGIL6)	Rhamnogalacturonate lyase family protein
713	AT2G22860	PHYTOSULFOKINE 2 PRECURSOR (PSK2)	Phytosulfokine 2 precursor, coding for a unique plant peptide growth factor. The mRNA is cell-to-cell mobile.
714	AT2G22880	(VQ12)	VQ motif-containing protein
715	AT2G22920	SERINE CARBOXYPEPTIDASE-LIKE 12 (SCPL12)	serine carboxypeptidase-like 12
716	AT2G22930		UDP-Glycosyltransferase superfamily protein
717	AT2G22940		hypothetical protein
718	AT2G22990	SINAPOYLGLUCOSE 1 (SNG1)	sinapoylglucose:malate sinapoyltransferase. Catalyzes the formation of sinapoylmalate from sinapoylglucose. Mutants accumulate excess sinapoylglucose.
719	AT2G23030	SNF1-RELATED PROTEIN KINASE 2.9 (SNRK2.9)	encodes a member of SNF1-related protein kinases (SnRK2)
720	AT2G23060		Acyl-CoA N-acyltransferases (NAT) superfamily protein
721	AT2G23110		Late embryogenesis abundant protein, group 6
722	AT2G23170	(GH3.3)	encodes an IAA-amido synthase that conjugates Asp and other amino acids to auxin in vitro.
723	AT2G23180	CYTOCHROME P450, FAMILY 96, SUBFAMILY A, POLYPEPTIDE 1 (CYP96A1)	member of CYP96A
724	AT2G23200		Protein kinase superfamily protein
725	AT2G23240	ARABIDOPSIS THALIANA METALLOTHIONEIN 4B (ATMT4B)	AtMT4b is a member of Type 4 metallothionein (MT) genes. It is involved in the early develoment of the embryo and in the accumulation of metal ions especially Zn in the seeds.
726	AT2G23270	PRECURSOR OF PAMP-INDUCED PEPTIDE 3 (PREPIP3)	Encoding a precursor protein of a secreted peptide that is responsive to flg22 stimulus. Finetuning role in modulation of immunity through the regulation of SA and JA biosynthesis and signalling pathways.
727	AT2G23410	CIS-PRENYLTRANSFERASE (CPT)	Encodes cis-prenyltransferase involved in dolichol biosynthesis.
728	AT2G23480		transposable_element_gene;similar to unknown protein [Arabidopsis thaliana] (TAIR:AT5G35794.1);(source:TAIR10)
729	AT2G23500		transposable_element_gene;Mutator-like transposase family, has a 2.4e-80 P-value blast match to O80466 /172-336 Pfam PF03108 MuDR family transposase (MuDr-element domain);(source:TAIR10)
730	AT2G23540		GDSL-motif esterase/acyltransferase/lipase. Enzyme group with broad substrate specificity that may catalyze acyltransfer or hydrolase reactions with lipid and non-lipid substrates.
731	AT2G23670	HOMOLOG OF SYNECHOCYSTIS YCF37 (YCF37)	Phosphorylated protein in the thylakoid lumen.
732	AT2G23720		transposable_element_gene;Mutator-like transposase family, has a 6.7e-76 P-value blast match to Q9SI25 /181-349 Pfam PF03108 MuDR family transposase (MuDr-element domain);(source:TAIR10)
733	AT2G23760	BEL1-LIKE HOMEODOMAIN 4 (BLH4)	Encodes a member of the BEL family of homeodomain proteins. Plants doubly mutant for saw1/saw2 (blh2/blh4) have serrated leaves. BP is expressed in the serrated leaves, therefore saw2 and saw1 may act redundantly to repress BP in leaves. Regulates together with BLH2 demethylesterification of homogalacturonan in seed mucilage.
734	AT2G23890		HAD-superfamily hydrolase, subfamily IG, 5-nucleotidase
735	AT2G24090	PLASTID RIBOSOMAL PROTEIN L35 (PRPL35)	Ribosomal protein L35
736	AT2G24230		Leucine-rich repeat protein kinase family protein
737	AT2G24270	ALDEHYDE DEHYDROGENASE 11A3 (ALDH11A3)	Encodes a protein with non-phosphorylating NADP-dependent glyceraldehyde-3-phosphate dehydrogenase activity. The activity of the enzyme was determined from leaf extracts; the enzyme has not been purified to confirm activity.
738	AT2G24400	SMALL AUXIN UPREGULATED RNA 38 (SAUR38)	SAUR-like auxin-responsive protein family
739	AT2G24650		B3 domain-containing protein REM13
740	AT2G24740	SET DOMAIN GROUP 21 (SDG21)	Encodes a SU(VAR)3-9 homolog, a SET domain protein (Homology Subgroup V; Orthology Group 1). Known SET domain proteins are involved in epigenetic control of gene expression. There are 10 SUVH genes in Arabidopsis and members of this subfamily of the SET proteins have an additional conserved SRA domain. This protein is a putative histone methyltransferase (predicted to methylate H3K9/20) related t…
741	AT2G24800		Peroxidase superfamily protein
742	AT2G24980	EXTENSIN 6 (EXT6)	Proline-rich extensin-like family protein
743	AT2G25160	CYTOCHROME P450, FAMILY 82, SUBFAMILY F, POLYPEPTIDE 1 (CYP82F1)	cytochrome P450, family 82, subfamily F, polypeptide 1
744	AT2G25450	GLUCOSINOLATE HYDROXYLASE (GSL-OH)	Encodes a 2-oxoacid-dependent dioxygenase involved in the production of 2-hydroxybut-3-enyl glucosinolate.
745	AT2G25630	BETA GLUCOSIDASE 14 (BGLU14)	beta glucosidase 14
746	AT2G25680	MOLYBDATE TRANSPORTER 1 (MOT1)	Encodes a high-affinity molybdate transporter. Mutant has reduced concentrations of molybdate in roots and shoots, and reduced shoot and root length when growing on Mo-limited medium.
747	AT2G25810	TONOPLAST INTRINSIC PROTEIN 4;1 (TIP4;1)	tonoplast intrinsic protein 4
748	AT2G25860
749	AT2G25890		Oleosin family protein
750	AT2G25900	(ATCTH)	Encodes a protein with two tandem-arrayed CCCH-type zinc fingers that binds RNA and is involved in RNA turnover. The mRNA is cell-to-cell mobile.
751	AT2G25940	ALPHA-VACUOLAR PROCESSING ENZYME (ALPHA-VPE)	Encodes a vacuolar processing enzyme belonging to a novel group of cysteine proteinases that is expressed in vegetative organs and is upregulated in association with various types of cell death and under stressed conditions.
752	AT2G26020	PLANT DEFENSIN 1.2B (PDF1.2b)	Predicted to encode a PR (pathogenesis-related) protein. Belongs to the plant defensin (PDF) family with the following members: At1g75830/PDF1.1, At5g44420/PDF1.2a, At2g26020/PDF1.2b, At5g44430/PDF1.2c, At2g26010/PDF1.3, At1g19610/PDF1.4, At1g55010/PDF1.5, At2g02120/PDF2.1, At2g02100/PDF2.2, At2g02130/PDF2.3, At1g61070/PDF2.4, At5g63660/PDF2.5, At2g02140/PDF2.6, At5g38330/PDF3.1 and At4g30070/PDF…
753	AT2G26170	CYTOCHROME P450, FAMILY 711, SUBFAMILY A, POLYPEPTIDE 1 (CYP711A1)	Encodes a protein with similarity to thromboxane-A synthase, member of the CYP711A cytochrome P450 family. MAX1 is a specific repressor of vegetative axillary buds generated by the axillary meristem. Expressed in vascular traces in the rosette stem and axillary buds throughout plant development. Mutants have increased axillary branches. Along with MAX3,4 thought to mediate control of shoot branch…
754	AT2G26290	ROOT-SPECIFIC KINASE 1 (ARSK1)	root-specific kinase 1
755	AT2G26330	ERECTA (ER)	Homologous to receptor protein kinases. Involved in specification of organs originating from the shoot apical meristem. Contains a cytoplasmic protein kinase catalytic domain, a transmembrane region, and an extracellular leucine-rich repeat. ER has been identified as a quantitative trait locus for transpiration efficiency by influencing epidermal and mesophyll development, stomatal density and po…
756	AT2G26400	ACIREDUCTONE DIOXYGENASE 3 (ARD3)	Encodes a protein predicted to belong to the acireductone dioxygenase (ARD/ARD?)family.
757	AT2G26500	(PETM)	Essential for the stabilization and function of the cytochrome b6f complex.
758	AT2G26520		transmembrane protein
759	AT2G26650	K+ TRANSPORTER 1 (KT1)	Encodes AKT1, a member of the Shaker family inward rectifying potassium channel predominantly expressed in predominantly in root hairs and root endodermis. This family includes five groups based on phylogenetic analysis (FEBS Letters (2007) 581: 2357): I (inward rectifying channel): AKT1 (AT2G26650), AKT5 (AT4G32500) and SPIK (also known as AKT6, AT2G25600); II (inward rectifying channel): KAT1 (…
760	AT2G26710	PHYB ACTIVATION TAGGED SUPPRESSOR 1 (BAS1)	Encodes a member of the cytochrome p450 family that serves as a control point between multiple photoreceptor systems and brassinosteroid signal transduction. Involved in brassinolide metabolism. Mediates response to a variety of light signals including hypocotyl elongation and cotyledon expansion.
761	AT2G26740	SOLUBLE EPOXIDE HYDROLASE (SEH)	Encodes a soluble epoxide hydrolase whose expression is induced by auxin and water stress.
762	AT2G26910	ATP-BINDING CASSETTE G32 (ABCG32)	Encodes a member of the PLEIOTROPIC DRUG RESISTANCE family of ATP binding cassette transporters. Required for the formation of a functional cuticle.
763	AT2G27000	CYTOCHROME P450, FAMILY 705, SUBFAMILY A, POLYPEPTIDE 8 (CYP705A8)	member of CYP705A
764	AT2G27180		hypothetical protein
765	AT2G27300	NTM1-LIKE 8 (NTL8)	NTL8 is a membrane-associated NAC transcription factor that binds both TRY and TCL1. Overexpression results in fewer trichomes.
766	AT2G27360		GDSL-motif esterase/acyltransferase/lipase. Enzyme group with broad substrate specificity that may catalyze acyltransfer or hydrolase reactions with lipid and non-lipid substrates.
767	AT2G27380	EXTENSIN PROLINE-RICH 1 (EPR1)	Encodes an extensin like gene involved in seed germination.
768	AT2G27700		eukaryotic translation initiation factor 2 family protein / eIF-2 family protein
769	AT2G27775		PPR containing protein
770	AT2G27810	NUCLEOBASE-ASCORBATE TRANSPORTER 12 (NAT12)	Encodes a plasma-membrane localized nucleobase transporter capable of transporting adenine, guanine, uracil and hypoxanthine. Likely to be a proton-nucleobase symporter.
771	AT2G27830		hypothetical protein
772	AT2G27880	ARGONAUTE 5 (AGO5)	AGO5.Required for antiviral RNA silencing.Confers resistance to Potato virus X.
773	AT2G28400		senescence regulator (Protein of unknown function, DUF584)
774	AT2G28410		transmembrane protein
775	AT2G28530
776	AT2G28650	EXOCYST SUBUNIT EXO70 FAMILY PROTEIN H8 (EXO70H8)	A member of EXO70 gene family, putative exocyst subunits, conserved in land plants. Arabidopsis thaliana contains 23 putative EXO70 genes, which can be classified into eight clusters on the phylogenetic tree.
777	AT2G28670	ENHANCED SUBERIN 1 (ESB1)	Encodes a protein of unknown function that is involved in formation of the casparian strip. ESB1 is localized to the casparian strip and this localization is depended on CASP1 and 2. esb1 mutants have increased levels of suberin, disordered casparian strip and altered levels of several ions in their leaves.
778	AT2G28755		UDP-D-glucuronate carboxy-lyase-like protein
779	AT2G28820
780	AT2G28850	CYTOCHROME P450, FAMILY 710, SUBFAMILY A, POLYPEPTIDE 3 (CYP710A3)	member of CYP710A
781	AT2G28870	(SMR10)	cyclin-dependent kinase inhibitor SMR1-like protein
782	AT2G29090	CYTOCHROME P450, FAMILY 707, SUBFAMILY A, POLYPEPTIDE 2 (CYP707A2)	Encodes a protein with ABA 8'-hydroxylase activity, involved in ABA catabolism. Member of the CYP707A gene family. This gene predominantly accumulates in dry seeds and is up-regulated immediately following imbibition. CYP707A2 appears to play a major role in the rapid decrease in ABA levels during early seed imbibition.
783	AT2G29310		NAD(P)-binding Rossmann-fold superfamily protein
784	AT2G29330	TROPINONE REDUCTASE (TRI)	tropinone reductase
785	AT2G29350	SENESCENCE-ASSOCIATED GENE 13 (SAG13)	Encodes a senescence associated protein required for resistance against fungal pathogens. Negative regulator of defense against bacterial pathogens. Induced by ROS. Required for defense against ROS and fungal pathogens most likely by activating anthocyanin biosynthesis.
786	AT2G29370		NAD(P)-binding Rossmann-fold superfamily protein
787	AT2G29420	GLUTATHIONE S-TRANSFERASE TAU 7 (GSTU7)	Encodes glutathione transferase belonging to the tau class of GSTs. Naming convention according to Wagner et al. (2002). Induced by Salicylic acid. Independent of NPR1 for their induction by salicylic acid.
788	AT2G29440	GLUTATHIONE S-TRANSFERASE TAU 6 (GSTU6)	Encodes glutathione transferase belonging to the tau class of GSTs. Naming convention according to Wagner et al. (2002).
789	AT2G29460	GLUTATHIONE S-TRANSFERASE TAU 4 (GSTU4)	Encodes glutathione transferase belonging to the tau class of GSTs. Naming convention according to Wagner et al. (2002). Role in the degradation of H2O2 to water using glutathione as electron donor
790	AT2G29480	GLUTATHIONE S-TRANSFERASE TAU 2 (GSTU2)	Encodes glutathione transferase belonging to the tau class of GSTs. Naming convention according to Wagner et al. (2002).
791	AT2G29490	GLUTATHIONE S-TRANSFERASE TAU 1 (GSTU1)	Encodes glutathione transferase belonging to the tau class of GSTs. Naming convention according to Wagner et al. (2002).
792	AT2G29530	TRANSLOCASE OF THE INNER MEMBRANE 10 (TIM10)	Encodes a small zinc finger-like protein that is a component of the mitochondrial protein import apparatus. Together with AtTIM9, AtTIM10 is non-redundantly essential for maintaining mitochondrial function of early embryo proper cells and endosperm free-nuclei.
793	AT2G29630	THIAMINC (THIC)	Encodes a protein involved in thiamin biosynthesis. The protein is an iron-sulfur cluster protein predicted to catalyze the conversion of 5-aminoimidazole ribonucleotide (AIR) to hydroxymethylpyrimidine (HMP) or hydroxymethylpyrimidine phosphate (HMP-P). A severe reduction of THIC levels in plants decreases vitamin B1 (thiamin diphosphate (TPP)) levels and also leads to changes in the levels of n…
794	AT2G29750	UDP-GLUCOSYL TRANSFERASE 71C1 (UGT71C1)	UDP-glucosyl transferase 71C1
795	AT2G29890	VILLIN 1 (VLN1)	Encodes a ubiquitously expressed villin-like protein, whose mRNA may be alternatively processed. Villin belongs to a superfamily of actin binding proteins called the villin/gelsolin family. Animal villins are involved in actin binding. VLN1 protein co-localizes with actin filaments in several assays. VLN1 binds and bundles F-actin in a calcium-independent manner. It does not nucleate, cap or seve…
796	AT2G29940	ATP-BINDING CASSETTE G31 (ABCG31)	pleiotropic drug resistance 3
797	AT2G30140	UDP-GLUCOSYL TRANSFERASE 87A2 (UGT87A2)	Encodes a putative glycosyltransferase. Regulates flowering time via FLOWERING LOCUS C.
798	AT2G30200	EMBRYO DEFECTIVE 3147 (EMB3147)	Malonyl-ACP expressed in developing seeds. Loss of function mutants are embryo lethal and over expression in seeds leads to increased seed oil content.
799	AT2G30250	WRKY DNA-BINDING PROTEIN 25 (WRKY25)	member of WRKY Transcription Factor; Group I. Located in nucleus. Involved in response to various abiotic stresses - especially salt stress.
800	AT2G30470	HIGH-LEVEL EXPRESSION OF SUGAR-INDUCIBLE GENE 2 (HSI2)	HSI2 is a member of the ABI3 family of B3 domain proteins and functions as an active repressor of the Spo minimal promoter through the EAR motif. It contains a plant-specific B3 DNA-binding domain. It is expressed at similar levels in all organs. Treatment with 6% sucrose showed a slight increase in transcript levels after 24 h. No changes were observed after treatment with 50?M ABA. It is locali…
801	AT2G30510
802	AT2G30550	DAD1-LIKE LIPASE 3 (DALL3)	Encodes a lipase that hydrolyzes phosphatidylcholine, glycolipids as well as triacylglycerols.
803	AT2G30570	PHOTOSYSTEM II REACTION CENTER W (PSBW)	Encodes PsbW, a protein similar to photosystem II reaction center subunit W. Loss of PsbW destabilizes the supramolecular organization of PSII.
[truncated: 1,441 more rows]
