# Supplementary material for: Weighted Gene Correlation Network Analysis (WGCNA) of Arabidopsis somatic embryogenesis (SE) and identification of key gene modules to uncover SE-associated hub genes
Source: Research Square preprint supplement (doi:10.21203/rs.3.rs-1302556/v1), 2022-01-27
Supplement: Supplementary file 1 [file cdfb448411263ee991795168.docx]

**List of Additional data files**

**Additional file 1: Table S1.** The list of variance filtered genes (variance > 0.25 quantile).

**Additional file 1: Table S2.** The list of differentially expressed genes.

**Additional file 2: Table S3.** The top 10 hub genes of each network module.

**Additional file 3: Table S4.** Important hub genes based on differential gene expression analysis.

**Additional file 4: Table S5.** *EMB* genes in the co-expression network.

**Additional file 5: Table S6.** TFs in the co-expression network.

**Additional file 5: Table S7.** The list of microRNA-targeted TFs.

**Additional file 6: Table S8.** Distribution of genes encoding epigenetic regulators across network modules.
