# Supplementary material for: Weighted Gene Correlation Network Analysis (WGCNA) of Arabidopsis somatic embryogenesis (SE) and identification of key gene modules to uncover SE-associated hub genes
Source: Research Square preprint supplement (doi:10.21203/rs.3.rs-1302556/v1), 2022-01-27
Supplement: Supplementary file 2 [file cb5207f3b33af02a2a1778e6.xlsx]

## Sheet: EMB genes
	Additional file 4: Table S5. EMB genes in the co-expression network
	Module	Gene identifier	Gene Symbol	Predicted protein function	Additional comments on protein function
1	Black	AT5G14850	APTG1	Mannosyltransferase	ER-localized; Biosynthesis of GPI anchors
2	Black	AT5G59340	WOX2	Homeodomain Protein	Transcriptional regulator
3	Black	AT5G51020	CRL	Plastid Outer Envelope Membrane Protein	Required for plastid division
4	Black	AT3G48930	EMB1080	Ribosomal Protein S11	Translation in cytosol
5	Black	AT4G23940	FtsHi1	Chloroplast AAA-ATPase; Ycf2-FtsHi Complex Subunit	Required for chloroplast protein import
6	Black	AT4G12130	COG0354	Mitochondrial Fe-S Cluster Biogenesis Protein	Folate dependent
7	Black	AT3G04400	EMB2171	Ribosomal Protein L17/L23	Translation in mitochondria or cytosol
8	Black	AT1G49880	EMB3106	Mitochondrial Sulfhydryl Oxidase	Proposed to stabilize mitochondrial proteins by _x000D_ oxidative protein folding
9	Black	AT1G02780	EMB2386	Ribosomal Protein L19	Translation in cytosol
10	Black	AT1G78580	TPS1	Trehalose-6-Phosphate Synthase 1	Catalyzes first step in trehalose biosynthesis
11	Black	AT2G03870	EMB2816	Pre-mRNA Splicing Factor	RNA processing and decay
12	Black	AT2G18020	EMB2296	Ribosomal Protein L8/L2	Translation in mitochondria or cytosol
13	Black	AT2G34480	RPL18aB	Ribosomal Protein	Translation in cytosol
14	Blue	AT2G39770	CYT1	Mannose-1-Phosphate-Guanyltransferase; GDP-Mannose_x000D_ Pyrophosphorylase	GDP-mannose production; N-glycosylation; Vitamin C_x000D_ biosynthesis
15	Blue	AT2G47620	SWI3A	Subunit of SWI/SNF Chromatin Remodeling Complex	ATP-dependent chromatin remodeling; _x000D_ Transcriptional regulation
16	Blue	AT4G14590	EMB2739	snRNA Processing Factor	snRNA 3' end maturation; Pre-mRNA splicing
17	Blue	AT5G19820	EMB2734	Karyopherin (Importin) Protein	Import of proteins into nucleus; miRNA biogenesis
18	Blue	AT5G20920	EMB1401	Translation Initiation Factor	Attachment of ribosome small subunit in translation
19	Blue	AT4G36480	EMB2779	Serine Palmitoyltransferase Subunit	Catalyzes first step in sphingolipid biosynthesis
20	Blue	AT4G36630	EMB2754	Putative Vacuolar Protein (VPS39)	Proposed role in vacuolar protein sorting
21	Blue	AT1G31860	HISN2	Histidine Biosynthetic Enzyme	Catalyzes second step in histidine biosynthesis
22	Blue	AT5G16750	TOZ	Uncertain	Nucleolar WD-40 repeat protein; _x000D_ Possible role in 18S rRNA biogenesis
23	Blue	AT5G27740	EMB2775	DNA Replication Factor C Subunit	DNA replication; PCNA clamp loading
24	Blue	AT5G27540	EMB2473	Mitochondrial GTPase	Regulation of mitochondrial trafficking and morphology
25	Blue	AT5G26760	RIMA	Putative Role in Nuclear Import and Transcriptional Regulation	Interacts with IYO transcriptional regulator
26	Blue	AT5G67570	EMB1408	PPR Protein	RNA binding protein; Organellar gene function
27	Blue	AT5G66055	EMB2036	Uncertain	Chloroplast-localized ankyrin repeat protein
28	Blue	AT5G63420	EMB2746	Chloroplast Ribonuclease J	Chloroplast RNA metabolism
29	Blue	AT5G62990	EMB1692	PORR Domain Protein	Putative role in organellar RNA splicing or metabolism
30	Blue	AT5G60540	EMB2407	Pyridoxine Glutaminase	Pyroxidine (vitamin B6) biosynthesis
31	Blue	AT5G59440	ZEUS1	Thymidylate Kinase	Biosynthesis of dTDP; Regulation of replication
32	Blue	AT5G58230	MSI1	Polycomb Repressive Complex Subunit	Chromatin modification; Histone methylation
33	Blue	AT5G58020	RTF2	Replication Termination Factor Domain Protein	Pre-mRNA splicing
34	Blue	AT5G55940	EMB2731	Unknown	None
35	Blue	AT5G53400	BOB1	Non-Canonical Small Heat Shock Protein	Putative molecular chaperone
36	Blue	AT5G49720	KOR	Endo-B-1,4-Glucanase; Glycosyl Hydrolase	Cellulose biosynthesis
37	Blue	AT5G49010	EMB2812	GIN5 Complex Subunit	DNA replication
38	Blue	AT5G48720	XRI1	Novel DNA Repair Factor	Functions in meiosis; male gametophyte development
39	Blue	AT5G48840	PTS	Pantothenate Synthetase	Vitamin B5 biosynthesis; Coenzyme A function
40	Blue	AT5G42080	ADL1A	Dynamin-Like Protein	Associated with cell plate; Similar to phragmoplastin; _x000D_ Proposed role in vesicular trafficking and cytokinesis
41	Blue	AT5G37510	EMB1467	Mitochondrial NADH Dehydrogenase Complex Subunit	Role in electron transport chain
42	Blue	AT5G23880	EMB1265	Cleavage and Polyadenylation Specificity Factor	Location of poly(A) sites; Modulation of transcription _x000D_ termination
43	Blue	AT5G18580	FASS	Protein Phosphatase (PP2A Complex Subunit)	Preprophase band formation; Orientation of cell division
44	Blue	AT5G17710	EMB1241	Chloroplast GrpE Protein	Interacts with Hsp70; Chloroplast protein maintenance
45	Blue	AT5G13780	NAA10	N-Terminal Acetyltransferase, Catalytic Subunit	Protein modification
46	Blue	AT5G13010	EMB3011	RNA Helicase	Pre-mRNA splicing factor; miRNA biogenesis
47	Blue	AT5G11890	EMB3135	Unknown	None
48	Blue	AT5G09900	EMB2107	26S Proteasome Regulatory Subunit	Component of 26S proteasome lid
49	Blue	AT5G06240	EMB2735	Unknown	None
50	Blue	AT5G05680	EMB2789	Nuclear Envelope Protein (Nup88)	Nuclear protein export; Spindle apparatus function
51	Blue	AT5G02190	ASP38	Aspartic Protease	ER-localized protein
52	Blue	AT5G02250	EMB2730	Ribonuclease II Family Protein	3' to 5' Exoribonuclease; Maturation of chloroplast RNAs
53	Blue	AT3G60740	TTN1	Tubulin Folding Cofactor D	Regulation of B-tubulin folding and microtubule dynamics
54	Blue	AT3G55010	EMB2818	Phosphoribosylformylglycinamidine Cyclo-Ligase (PUR5)	AIR synthetase; Purine biosynthesis
55	Blue	AT3G54650	FBL17	F-Box Protein	Cell cycle regulation in male gametophyte development
56	Blue	AT3G50870	HAN	GATA Factor Transcriptional Regulator	Regulation of transcription
57	Blue	AT3G49240	EMB1796	PPR Protein	Editing of mitochondrial and chloroplast transcripts;_x000D_ Interacts with DYW2
58	Blue	AT3G48750	CDC2A	A-Type Cyclin-Dependent Kinase	Cell cycle control
59	Blue	AT4G38440	IYO	Transcriptional Regulator	RNA polymerase II interacting factor
60	Blue	AT4G33090	APM1	M1 Aminopeptidase	Proposed role in auxin transport
61	Blue	AT4G32720	LA1	RNA Binding Protein	RNA maturation and stability in nucleus
62	Blue	AT4G32410	RSW1	Cellulose Synthase	Cellulose biosynthesis; Primary cell wall formation
63	Blue	AT4G32400	EMB104	Transmembrane Nucleotide Transporter	Protein localized to plastids and mitochondria
64	Blue	AT4G31810	CHY4	3-Hydroxyisobutyryl-CoA Hydrolase	Valine degradation in mitochondria
65	Blue	AT4G27010	EMB2788	Uncertain	Possible role in ribosome biogenesis
66	Blue	AT4G26500	EMB1374	Fe-S Cluster Assembly Factor	Activator of Plastidic and Mitochondrial Desulfurases
67	Blue	AT4G23660	PPT1	4-Hydroxybenzoate Polyprenyl Diphosphate Transferase	Ubiquinone Biosynthesis
68	Blue	AT4G21710	EMB1989	RNA Polymerase II Subunit	Transcription
69	Blue	AT4G20740	EMB3131	PPR Protein	RNA binding protein; Organellar gene function
70	Blue	AT4G10760	EMB1706	m6A Methyltransferase Complex Subunit	N6-adenosine methylation of mRNA; _x000D_ mRNA modification, splicing, metabolism
71	Blue	AT4G09980	EMB1691	m6A Methyltransferase Complex Subunit	N6-adenosine methylation of mRNA; _x000D_ mRNA modification, splicing, metabolism
72	Blue	AT4G07410	PCN	WD-40 Repeat Protein	Proposed role in auxin signaling
73	Blue	AT4G02570	AXR6	Cullin 1 Protein; SCF Ubiquitin Ligase Complex Subunit	Protein degradation; Auxin response pathways
74	Blue	AT4G02060	PRL	DNA Replication Licensing Factor	Initiation of replication
75	Blue	AT4G00231	ZIX	Unknown	Armadillo Repeat Protein
76	Blue	AT1G56200	EMB1303	Unknown	Chloroplast-localized protein
77	Blue	AT3G20630	TTN6	Deubiquitinating Enzyme	Ubiquitin processing and recycling;_x000D_ Negative regulator of endoreduplication
78	Blue	AT3G13200	EMB2769	U5 Associated Protein	Proposed role in pre-mRNA splicing
79	Blue	AT1G24340	EMB2421	Polyketide Hydroxylase-Related Monooxygenase	None
80	Blue	AT3G20440	EMB2729	1,4-Alpha-Glucan Branching Enzyme	Similar to starch branching enzyme
81	Blue	AT3G19770	VPS9A	Guanine Exchange Factor	Regulator of Rab5 GTPase; Membrane trafficking
82	Blue	AT3G17910	EMB3121	Cytochrome C Oxidase Assembly (Surf1)	Mitochondrial electron transport
83	Blue	AT3G27670	RST1	Uncertain	Plasma membrane protein; Cuticular wax formation
84	Blue	AT3G04680	CLPS3	Polyadenylation Factor	mRNA 3' end processing
85	Blue	AT3G10670	NAP7	Plastidic SufC-Like ABC/ATPase	Fe-S cluster maintenance and repair
86	Blue	AT3G08950	HCC1	Cytochrome C Oxidase Assembly Factor	Homolog of yeast copper chaperone
87	Blue	AT3G10220	EMB2804	Tubulin Folding Cofactor B	Regulation of B-tubulin folding and microtubule dynamics
88	Blue	AT3G01610	EMB1354	AAA ATPase	Putative cell division control protein;_x000D_ Possible role in protein unfolding
89	Blue	AT1G63160	EMB2811	DNA Replication Factor C Subunit	DNA replication; PCNA clamp loading
90	Blue	AT1G77470	EMB2810	DNA Replication Factor C Subunit	DNA replication; PCNA clamp loading; Chromatin assembly
91	Blue	AT1G67630	EMB2814	DNA Polymerase Alpha; Beta Subunit	Initiation of DNA replication
92	Blue	AT1G80410	EMB2753	N-Terminal Acetyltransferase	Protein modification
93	Blue	AT1G51450	TRAUCO	Trithorax Class Transcriptional Regulator; _x000D_ H3K4 Methyltransferase Complex Component	Regulation of transcription; Histone modification
94	Blue	AT1G55870	PARN	Poly(A) Ribonuclease	Regulation of poly(A) status of mitochondrial mRNA
95	Blue	AT1G62360	STM	Knotted Class Homeodomain Protein	Transcriptional regulation; Shoot meristem formation
96	Blue	AT1G07910	ZYG3	tRNA Ligase	tRNA splicing in cytosol
97	Blue	AT1G34550	EMB2756	Unknown	None
98	Blue	AT1G71820	SEC6	Subunit of Exocyst Complex	Tethering of secretory vesicles to plasma membrane
99	Blue	AT1G08260	EMB2284	Subunit of DNA Polymerase Epsilon	DNA replication and repair; Cell cycle control
100	Blue	AT1G49400	EMB1129	Ribosomal Protein S17	Translation in cytosol
101	Blue	AT1G21690	EMB1968	Replication Factor C Subunit	DNA replication; PCNA clamp loading
102	Blue	AT1G15220	CCMH	Mitochondrial Thiol-Disulfide Oxidoreductase	Mitochondrial cytochrome C maturation
103	Blue	AT1G13980	EMB30	ARF Guanine Exchange Factor	Large membrane-associated ARF GEF; Role in vesicle _x000D_ trafficking and cell polarity
104	Blue	AT1G76060	EMB1793	Uncertain	Complex 1 LYR motif protein
105	Blue	AT1G79490	EMB2217	PPR Protein	RNA binding protein; Organellar gene function
106	Blue	AT2G17510	EMB2763	3' to 5' Exoribonuclease	Exosome component; Proposed role in ribosomal RNA _x000D_ processing
107	Blue	AT1G05600	EMB3101	PPR Protein	RNA binding protein; Organellar gene function
108	Blue	AT2G17250	EMB2762	Ribosome Biogenesis Factor	Nucleolar protein; Proposed role in rRNA processing
109	Blue	AT2G16440	MCM4	Minichromosome Maintenance Complex Subunit	DNA replication machinery
110	Blue	AT2G21470	EMB2764	SUMO Activating Enzyme	Protein modification
111	Blue	AT1G60170	EMB1220	Splicing Factor	Pre-mRNA processing; Transcriptional gene silencing
112	Blue	AT1G03360	RRP4	Exosome Subunit; Exonuclease	rRNA processing; RNA metabolism
113	Blue	AT1G10270	GRP23	Novel PPR Protein	Putative transcriptional regulator; Interacts with RNA _x000D_ polymerase II
114	Blue	AT2G18390	TTN5	ARL2 GTPase	Regulation of B-tubulin folding and microtubule dynamics
115	Blue	AT2G20000	HBT	Anaphase Promoting Complex Subunit	Protein degradation; Cell cycle control
116	Blue	AT2G01350	QPT	Quinolinate Phosphoribosyl Transferase	NAD biosynthesis from aspartate in plastids
117	Blue	AT2G01420	PIN4	Transmembrane Auxin Efflux Carrier	Maintenance of embryonic auxin gradients
118	Blue	AT2G38770	EMB2765	RNA Helicase	Pre-mRNA splicing; miRNA biogenesis
119	Blue	AT2G31060	EMB2785	E2Fa Transcriptional Activator	Cell proliferation; Cell cycle control
120	Blue	AT2G26060	EMB1345	Cytosolic Fe-S Cluster Assembly Factor	WD-40 repeat protein
121	Blue	AT2G07690	MCM5	Minichromosome Maintenance Complex Subunit	DNA replication machinery
122	Blue	AT2G34260	WDR55	WD Repeat Protein	Substrate recruitment for ubiquitin E3 ligase complexes
123	Blue	AT2G38280	FAC1	AMP Deaminase	Purine biosynthesis; Outer mitochondrial membrane protein
124	Blue	AT2G41500	EMB2776	Pre-mRNA Splicing Factor	Proposed role in pre-mRNA splicing
125	Blue	AT2G35030	COD1	Mitochondrial PPR Protein	Editing of cytochrome C oxidase, NADH dehydrogenase _x000D_ transcripts associated with respiratory complex
126	Blue	AT2G26350	PEX10	Peroxisomal Membrane Protein; Ubiquitin-Protein Ligase	Import of matrix proteins into peroxisomes
127	Brown	AT4G16370	OPT3	Plasma Membrane Iron Transporter	Iron homeostasis
128	Brown	AT4G16440	NAR1	Cytosolic Fe-S Cluster Assembly Component	None
129	Brown	AT5G13480	FY	mRNA Polyadenylation Factor	3' End processing of specific mRNAs
130	Brown	AT5G15920	EMB2782	SMC5/6 Complex Subunit	Sister chromatid cohesion; Homologous recombination _x000D_ between sister chromatids; Double-strand break repair
131	Brown	AT5G66680	DGL1	Oligosaccharyltransferase (OST) Complex Subunit	Proposed role in N-linked glycosylation of proteins
132	Brown	AT5G63290	HEMN1	Coproporphyrinogen III Oxidase; Mitochondrial Localized	Tetrapyrrole biosynthesis
133	Brown	AT5G56290	EMB2790	Peroxisome Targeting Protein	Receptor for peroxisomal protein import
134	Brown	AT5G55490	GEX1	Plasma Membrane Protein	Proposed role in signaling pathway in gametophyte _x000D_ and early embryo
135	Brown	AT5G54800	GPT1	Plastidial Glucose-6-Phosphate/Phosphate Antiporter	Metabolite import into plastids
136	Brown	AT5G50960	NBP35	Cytosolic Fe-S Cluster Assembly Factor	Interacts with DRE2 protein
137	Brown	AT5G46280	MCM3	Minichromosome Maintenance Complex Subunit	DNA replication machinery
138	Brown	AT5G42390	SPP	Stromal Processing Peptidase	Cleavage of chloroplast transit peptide upon _x000D_ protein import from cytosol
139	Brown	AT5G41480	GLA1	Dihydrofolate Synthetase	Folate biosynthesis
140	Brown	AT5G40160	EMB506	Uncertain	Ankyrin repeat protein; Plastid differentiation
141	Brown	AT5G37630	EMB2656	Chromosome Condensation Factor	Similar to condensin subunit (CAP-G)
142	Brown	AT5G18820	EMB3007	Chloroplast Chaperonin	Folding of specific chloroplast proteins
143	Brown	AT5G08470	EMB2817	AAA ATPase	Peroxisome biogenesis
144	Brown	AT3G60830	ARP7	Actin-Related, Nuclear-Localized Protein	Proposed role in chromatin remodeling
145	Brown	AT3G55620	EMB1624	Translation Initiation Factor	Regulation of translation and 80S ribosome assembly
146	Brown	AT3G46560	EMB2474	Mitochondrial Inner Membrane Protein	Mitochondrial protein import
147	Brown	AT4G29660	EMB2752	Unknown	None
148	Brown	AT4G26300	EMB1027	Arginine tRNA Synthetase	Translation in chloroplasts
149	Brown	AT4G24270	EMB140	Uncertain	RNA recognition motif protein;_x000D_ Possible role in pre-mRNA processing and modification
150	Brown	AT4G22970	AESP	Separase; Kinesin Activating Protein	Separation of sister chromatids;_x000D_ Regulation of microtubule dynamics
151	Brown	AT4G21800	QQT2	ATP/GTP Binding Protein	Proposed role in microtubule localization
152	Brown	AT4G21300	AtDEK36	PPR Protein	RNA editing in mitochondria
153	Brown	AT4G13750	EMB2597	Uncertain	Plant-specific nuclear protein; Proposed role in auxin response
154	Brown	AT4G11150	EMB2448	Vacuolar H+ ATPase	Vacuolar proton pump component; Required for _x000D_ Golgi organization and secretory pathways
155	Brown	AT4G03240	FH	Frataxin	Mitochondrial and Chloroplast Fe-S cluster metabolism
156	Brown	AT4G02990	BSM	Uncertain	Plastid-localized mTERF protein;_x000D_ Plastid gene expression
157	Brown	AT3G18290	EMB2454	E3 Ubiquitin Ligase	Iron response mediator; Interacts with transcriptional regulators
158	Brown	AT3G16810	APUM24	Nucleolar Pumilio Class RNA Binding Protein	Pre-rRNA processing
159	Brown	AT3G13930	MTE2-2	Mitochondrial Pyruvate Dehydrogenase Subunit	Basic metabolism; Entry into citric acid cycle
160	Brown	AT3G15660	GRXS15	Mitochondrial Glutaredoxin S15	Fe-S protein maturation
161	Brown	AT3G17300	EMB2786	Uncertain	Putative Complex I (LYR domain) protein; _x000D_ Possible role in Fe-S cluster assembly; _x000D_ Mitochondrial electron transport
162	Brown	AT3G04460	PEX12	Peroxisomal Ubiquitin-Protein Ligase	Required for peroxisome biogenesis
163	Brown	AT3G08800	SIEL1	Subunit of snRNA 3' End Maturation Complex	Required for endosome localization of SHORT ROOT _x000D_ transcription factor
164	Brown	AT3G07430	EMB1990	Uncertain	Integral membrane, chloroplast division protein;_x000D_ Functions in distribution of nucleoids in chloroplasts
165	Brown	AT3G07630	ADT2	Arogenate Dehydrogenase; Prephenate Dehydratase	Phenylalanine biosynthesis; Bifunctional enzyme
166	Brown	AT1G73590	PIN1	Auxin Efflux Carrier	Maintenance of embryonic auxin gradients
167	Brown	AT1G55900	EMB1860	Inner Mitochondrial Membrane Protein	Import of mitochondrial matrix proteins
168	Brown	AT1G20200	EMB2719	26S Proteasome Regulatory Subunit	Component of 26S proteasome; Protein degradation
169	Brown	AT1G44900	MCM2	DNA Helicase; Minichromosome Maintenance Complex Subunit	DNA replication machinery
170	Brown	AT1G79810	PEX2	Peroxisomal Membrane Protein; Ubiquitin-Protein Ligase	Import of matrix proteins into peroxisomes
171	Brown	AT1G80070	SUS2	PRP8 Splicing Factor	Pre-mRNA processing factor; Spliceosome component
172	Brown	AT1G21650	SECA2	Chloroplast Inner Envelope Translocase	Chloroplast protein import
173	Brown	AT1G13120	GLE1	Nucleoporin; Nuclear Pore Complex Subunit	RNA transport from nucleus to cytosol
174	Brown	AT2G04030	EMB1956	Heat Shock Protein	Chloroplast-localized molecular chaperone; _x000D_ Proposed role in chloroplast protein import and _x000D_ thylakoid membrane maintenance
175	Brown	AT1G59990	EMB3108	DEAD Box RNA Helicase	Proposed role in chloroplast ribosome biogenesis
176	Brown	AT1G79230	STR1	Mitochondrial Sulfurtransferase 1	Rhodanese; Sulfur transfer; Cysteine degradation
177	Brown	AT1G67490	KNF	Alpha Glucosidase 1	Early step in N-glycan trimming of glycoproteins
178	Brown	AT1G67320	EMB2813	DNA Polymerase Alpha; Primase Subunit	Initiation of DNA replication
179	Brown	AT2G15690	DYW2	PPR Protein	Editing of chloroplast and mitochondrial transcripts; _x000D_ Interacts with NUWA
180	Brown	AT2G18510	EMB2444	Spliceosome-Associated Protein	RNA recognition motif (RRM) protein; RNA processing
181	Brown	AT2G29530	TIM10	Mitochondrial Inner Membrane Protein	Mitochondrial protein import
182	Brown	AT2G37560	ORC2	Origin Recognition Complex Subunit	DNA replication; Chromatin structure; Gene silencing
183	Brown	AT2G44520	COX10	Mitochondrial Farnesyltransferase	Cytochrome C oxidase biogenesis
184	Brown	AT2G45690	SSE	Peroxisomal Biogenesis Factor	Required for protein and oil body biogenesis
185	Cyan	AT5G08170	EMB1873	Agmatine Iminohydrolase	Putrescine biosynthesis
186	Cyan	AT1G08510	FATB	Acyl-Acyl Carrier Protein Thioesterase	Saturated fatty acid biosynthesis
187	Cyan	AT2G27100	SERRATE	Zinc Finger Protein	Pre-mRNA splicing; miRNA biogenesis
188	Darkgreen	AT1G19770	PUP14	Purine Permease Transporter	Uptake of bioactive cytokinins to cytosol
189	Darkgreen	AT2G28620	RSW7	Kinesin-5 Protein	Microtubule organization in mitotic spindles
190	Darkgrey	AT2G41720	EMB2654	PPR Protein	Trans-splicing of plastid rps12 transcript
191	Darkred	AT1G15110	PSS1	Phosphatidylserine Synthase	Phosphatidylserine (membrane phospholipid) biosynthesis
192	Darkturquoise	AT3G05680	EMB2016	m6A Methyltransferase Complex Subunit	N6-adenosine methylation of mRNA; _x000D_ mRNA modification, splicing, metabolism
193	Darkturquoise	AT1G63700	YDA	MAP3K Protein Kinase	Protein phosphorylation, Signal transduction pathways
194	Darkturquoise	AT2G30920	EMB3002	Hexaprenyldihydroxybenzoate Methyltransferase	Ubiquinone biosynthesis in mitochondria
195	Green	AT2G45330	EMB1067	2' tRNA Phosphotransferase	Catalytic role in tRNA splicing
196	Green	AT2G45270	GCP1	Mitochondrial Glycoprotease	HSP70 superfamily protein
197	Green	AT5G11040	TRS120	TRAPPII Tethering Factor	Membrane trafficking; Cell plate assembly during _x000D_ cytokinesis
198	Green	AT5G14800	EMB2772	Pyrroline-5-Carboxylate (P5C) Reductase;_x000D_ Proline Biosynthetic Enzyme	Catalyzes final step in proline biosynthesis from glutamate _x000D_ and ornithine
199	Green	AT5G26030	FC1	Ferrochelatase	Final enzyme for haem formation in the tetrapyrrole _x000D_ biosynthetic pathway
200	Green	AT5G24670	EMB2820	tRNA Adenosine Deaminase Subunit	Modification of wobble position of cytosolic tRNAs
201	Green	AT5G62440	DOM1	Uncertain	Nuclear protein; Similar to tomato LeDCL_x000D_ Putative role in ribosome biogenesis
202	Green	AT5G51430	EYE	Subunit of Golgi COG Complex	Vesicle trafficking; Golgi structure and function
203	Green	AT5G51200	EMB3142	Nuclear Pore Complex Protein (Nup205)	Nuclear protein export
204	Green	AT5G50210	QS	NAD Biosynthesis	Catalyzes second step in NAD biosynthesis from aspartate_x000D_ in plastids
205	Green	AT5G49930	EMB1441	Uncertain	Putative RNA binding protein; _x000D_ Possible role in ribosome biogenesis
206	Green	AT5G40480	EMB3012	Nuclear Pore Complex Protein (Nup210)	Nuclear protein export
207	Green	AT5G39710	EMB2745	PPR Protein	RNA binding protein; Organellar gene function
208	Green	AT5G22370	EMB1705	GTP Binding Protein	Microtubule organization
209	Green	AT5G08130	BIM1	bHLH Protein Interactor of Transcription Factors	Brassinosteroid signaling
210	Green	AT5G05560	EMB2771	E3 Ubiquitin Ligase Subunit	Anaphase promoting complex subunit; Cell cycle regulation
211	Green	AT5G04920	VPS36	Endosomal Sorting Complex (ESCRT-II) Subunit	Vacuolar biogenesis; Plasma membrane protein turnover
212	Green	AT3G55610	P5CS2	Delta 1-Pyrroline-5-Carboxylate Synthetase	Proline biosynthesis; Rate-limiting step
213	Green	AT3G55510	RBL	Uncertain	Noc2 domain protein
214	Green	AT3G48110	EDD	Glycine tRNA Synthetase	Translation in chloroplasts
215	Green	AT4G39920	POR	Tubulin Folding Cofactor C	Regulation of tubulin folding and microtubule dynamics
216	Green	AT4G39120	IMPL2	Histidinol-Phosphate Phosphatase	Histidine biosynthesis
217	Green	AT4G34200	PGDH1	3-Phosphoglycerate Dehydrogenase	Phosphoserine pathway of serine biosynthesis in _x000D_ plastids
218	Green	AT4G26900	HISN4	Histidine Biosynthetic Enzyme	Histidine biosynthesis
219	Green	AT4G20060	EMB1895	snRNA Processing Factor	snRNA 3' end maturation; Pre-mRNA splicing
220	Green	AT4G20090	EMB1025	PPR Protein	RNA binding protein; Organellar gene function
221	Green	AT4G05410	YAO	Nucleolar WD-40 Repeat Protein; _x000D_ Putative U3 snoRNP Complex Subunit	Potential role in 18S pre-rRNA processing
222	Green	AT4G03430	EMB2770	Spliceosome-Interacting Protein	Pre-mRNA splicing factor
223	Green	AT4G00450	CCT	Transcriptional Regulator	Modulates function of Mediator complex
224	Green	AT1G19850	MP	B3 Domain Transcription Factor	Transcriptional regulation; Auxin response pathway
225	Green	AT3G24560	RSY3	Putative Lysidine-tRNA-Ile Synthetase	Chloroplast tRNA editing
226	Green	AT3G07060	EMB1974	Unknown	None
227	Green	AT3G06350	EMB3004	Dehydroquinate Dehydratase; Shikimate Dehydrogenase	Chorismate biosynthesis
228	Green	AT3G02280	ATR3	Cytochrome P450 Reductase Like	NR1 subfamily of diflavin reductases; _x000D_ Potential role in Fe-S cluster biogenesis
229	Green	AT3G09070	OPS	Uncertain	Polar-localized, plasma membrane-associated protein;_x000D_ Role in protophloem development; cotyledon vascular _x000D_ complexity
230	Green	AT1G17690	NOF1	Nucleolar Protein	None
231	Green	AT1G19080	TTN10	GINS Complex Subunit	Initiation of replication
232	Green	AT1G12360	KEU	Cytokinesis-Related Sec1 Protein	Regulator of vesicle trafficking; Binds to cytokinesis-specific _x000D_ KNOLLE protein
233	Green	AT1G68990	MGP3	Mitochondrial Phage-Type RNA Polymerase	Transcription of mitochondrial genes
234	Green	AT1G71440	PFI	Tubulin Folding Cofactor E	Regulation of tubulin folding and microtubule dynamics
235	Green	AT1G67960	POD1	Uncertain	Proposed role in ER protein retention
236	Green	AT1G14610	TWN2	Valine tRNA Synthetase	Translation in mitochondria and cytosol
237	Green	AT1G43710	EMB1075	Serine Decarboxylase	Ethanolamine biosynthesis
238	Green	AT1G20050	HYD1	Sterol Isomerase	Catalyzes sterol biosynthetic step downstream of FACKEL
239	Green	AT1G50030	TOR	Protein Kinase (Target of Rapamycin)	Signaling pathways
240	Green	AT1G49510	EMB1273	Unknown	Putative chloroplast protein
241	Green	AT1G20960	EMB1507	Spliceosome-Associated RNA Helicase	RNA processing; Splicing of FLC transcripts
242	Green	AT1G75660	XRN3	5'-3' Exoribonuclease	Nuclear degradation of aberrant RNAs; Suppressor of _x000D_ post-transcriptional gene silencing
243	Green	AT2G31530	EMB2289	Chloroplast Inner Envelope Translocase	Import and integration of inner envelope membrane proteins
244	Green	AT2G21710	EMB2219	Uncertain	Chloroplast-localized mTERF domain protein;_x000D_ Putative role in chloroplast gene expression
245	Green	AT2G31340	EMB1381	Unknown	None
246	Green	AT1G08840	EMB2411	DNA Replication Helicase; Nuclease	DNA replication and repair; Okazaki fragment metabolism
247	Green	AT2G38020	VCL1	Vacuolar Sorting Protein (Vps16)	Vacuole biogenesis; Protein trafficking to the vacuole
248	Green	AT2G28880	EMB1997	Bifunctional PABA Synthase; Glutamine Amidotransferase	Para-aminobenzoic acid / folate biosynthesis
249	Green	AT2G32280	VCC	Unknown	Plant-specific protein; Role in cotyledon vascular complexity
250	Green	AT2G22870	EMB2001	Uncertain	Organelle-targeted GTPase (EngB/YihA family);_x000D_ Putative ribosome biogenesis GTPase
251	Green	AT2G34780	EMB1611	Uncertain	Putative role in promoting cell division
252	GreenYellow	AT5G57930	EMB1629	Putative Role in Accumulation of Fe-S Complexes	Chloroplast-localized protein
253	GreenYellow	AT4G04350	EMB2369	Leucine tRNA Synthetase	Translation in chloroplasts
254	GreenYellow	AT4G02790	EMB3129	Chloroplast-Targeted RbgA GTPase	Chloroplast ribosome biogenesis
255	GreenYellow	AT3G01370	CFM2	Chloroplast Intron Splicing Factor	Splicing of plastid group II introns
256	GreenYellow	AT2G31305	INH3	Inhibitor of Protein Phosphatase 1 Catalytic Activity	Regulation of signaling pathways
257	GreenYellow	AT1G70070	ISE2	RNA Helicase	Chloroplast RNA processing
258	GreenYellow	AT2G25660	EMB2410	Unknown	None
259	GreenYellow	AT2G30410	KIS	Tubulin Folding Cofactor A	Regulation of tubulin folding and microtubule dynamics
260	Grey	AT3G57870	EMB1637	SUMO Conjugating Enzyme	Protein modification; Role in stress response; Cell cycle control
261	Grey	AT3G27750	EMB3123	PPR Protein	Splicing of specific group II introns in plastids
262	Grey60	AT5G13710	SMT1	Sterol Methyltransferase	Sterol biosynthesis; Modulation of cholesterol levels
263	Lightcyan	AT3G54170	FIP37	m6A Methyltransferase Complex Subunit	N6-adenosine methylation of mRNA; _x000D_ mRNA modification, splicing, metabolism
264	Lightcyan	AT2G43650	EMB2777	Small Subunit (SSU) Processome Complex Interacting Protein	Nucleolar protein; Proposed role in rRNA biogenesis
265	LightGreen	AT4G31160	DCAF1	Nuclear Ubiquitin E3 Ligase	Protein degradation
266	LightYellow	AT4G31770	DBR1	Lariat Debranching Enzyme	Removal of spliced introns; Degradation of lariat RNAs; _x000D_ Regulation of miRNA biogenesis
267	LightYellow	AT3G12080	EMB2738	Uncertain	Putative ribosome biogenesis GTPase
268	LightYellow	AT1G21310	RSH	Cell Wall Hydroxyproline-Rich Glycoprotein; Extensin	Cell wall protein required for normal cell shape and _x000D_ positioning of cell plate during cytokinesis
269	LightYellow	AT1G32930	GALT31A	Galactosyltransferase; Galactosylation of Arabinogalactan _x000D_ Protein (AGP) Side Chains in Golgi Apparatus	Elongation of B-1,6-galactan side chains on AGPs
270	LightYellow	AT2G26890	GRV2	DnaJ Domain Protein (RME-8)	Endocytosis; Vacuolar sorting; Protein trafficking
271	Magenta	AT3G54350	EMB1967	Forkhead-Associated (FHA) Domain Protein	Putative role in signal transduction pathways
272	Magenta	AT4G02720	MAS2	Perinucleolar Protein; Homolog of Human NKAP	45S rDNA silencing; Interacts with splicing and _x000D_ ribosome biogenesis proteins
273	Magenta	AT1G01370	CENH3	Centromere-Specific Histone	Component of centromeric nucleosome
274	Magenta	AT1G64570	DUO3	Homeodomain Protein	Putative transcriptional regulator
275	Magenta	AT1G48410	AGO1	Argonaute; Effector in Small RNA-Based Gene Silencing	Cleavage or translational inhibition of target RNAs;_x000D_ Methylation of target DNAs
276	Magenta	AT2G36230	HISN3	BBMII Isomerase; Histidine Biosynthetic Enzyme	Catalyzes third step in histidine biosynthesis
277	Magenta	AT1G65440	SPT6L	Transcript Elongation Factor	Proposed role in transcription initiation and chromatin _x000D_ structure
278	Magenta	AT1G09770	CDC5	MYB Domain Transcription Factor	Cell cycle control; Proposed role in miRNA biogenesis
279	Magenta	AT2G39080	EMB2799	Uncertain	Potential role in chloroplast nutrient transport
280	Midnightblue	AT4G19350	EMB3006	Unknown	None
281	Midnightblue	AT2G26830	EMB1187	Choline/Ethanolamine Kinase	Enzyme in phospholipid (phosphatidylcholine) biosynthesis
282	Orange	AT1G24706	EMB2793	THO/TREX Complex Subunit	RNA transport and splicing; miRNA biogenesis
283	Pink	AT4G29910	EMB2798	Origin of Replication Complex	Initiation of replication
284	Pink	AT2G02150	EMB2794	Putative PPR Protein	Putative RNA binding protein
285	Purple	AT3G52590	EMB2167	Ubiquitin Fused to Ribosomal Protein L40	Ubiquitin ribosomal fusion protein
286	Purple	AT1G19800	TGD1	Chloroplast Envelope Protein; ABC Transporter	Import of lipids into chloroplasts
287	Purple	AT1G08130	LIG1	DNA Ligase	DNA replication and repair; Component of DNA _x000D_ demethylation machinery
288	Purple	AT2G04530	TRZ2	tRNase Z Enzyme; Plastid tRNA Processing	Cleavage of 3' end of plastid tRNA precursor
289	Red	AT5G19620	OEP80	Chloroplast Outer Envelope Protein	Uncertain role in chloroplast protein import
290	Red	AT5G63050	EMB2759	Unknown	None
291	Red	AT5G62410	TTN3	SMC2 Condensin	Chromosome condensation
292	Red	AT5G57590	BIO1	7-KAP, DAP Aminotransferase; Dethiobiotin Synthetase	Biotin synthesis in mitochondria; _x000D_ Bifunctional (BIO3-BIO1) protein
293	Red	AT5G48600	SMC4	Condensin Subunit	Chromatin condensation; Chromosome segregation; _x000D_ Silencing of pericentromeric transposons
294	Red	AT5G18570	EMB3138	Chloroplast Obg-Like GTPase	Plastid ribosome biogenesis
295	Red	AT3G61780	EMB1703	Unknown	None
296	Red	AT3G54670	TTN8	SMC1 Cohesin	Chromosomal ATPase; Sister chromatid cohesion; _x000D_ Chromosome segregation
297	Red	AT3G54720	AMP1	Putative Glutamate Carboxypeptidase	Similar to N-acetyl a-linked acidic dipeptidase; _x000D_ Precise biochemical function uncertain
298	Red	AT4G39620	EMB2453	PPR Protein	Proposed role in chloroplast tRNA maturation; _x000D_ Ribosome biogenesis
299	Red	AT4G38430	RopGEF1	Guanine Nucleotide Exchange Factor	Activator of Rho GTPases of plants
300	Red	AT4G35540	PTF2	Plant-Specific TFIIB-Related Protein	General transcription factor
301	Red	AT4G33460	EMB2751	ABC Transporter	Proposed role in chloroplast membrane transport
302	Red	AT4G31780	EMB2797	MGDG (Galactolipid) Synthesis	Monogalactosyldiacylglycerol biosynthesis
303	Red	AT3G20740	FIE	Polycomb Repressive Complex Subunit	Chromatin modification; Histone methylation
304	Red	AT3G04340	EMB2458	Chloroplast AAA-ATPase; Ycf2-FtsHi Complex Subunit	Required for chloroplast protein import
305	Red	AT1G55350	EMB1275	Calpain-Type Cysteine Protease	Homolog of maize DEK1; Transmembrane protein required_x000D_ for mechanosensitive calcium ion channel function
306	Red	AT1G53580	ETHE1	Mitochondrial Sulfur Dioxygenase	Sulfide detoxification
307	Red	AT1G80260	EMB1427	Gamma Tubulin; GCP5 Subunit	Microtubule nucleation
308	Red	AT1G10510	EMB2004	Uncertain	Leucine-rich repeat protein; Chloroplast localized;_x000D_ Similar to ribonuclease inhibitor proteins
309	Red	AT1G67440	EMB1688	Uncertain	Putative ribosome biogenesis GTPase
310	Red	AT2G17800	ROP3	ROP GTPase	Auxin transport and response
311	Red	AT2G41350	EMB2819	Augmin Complex Subunit	Microtubule dynamics; Mitotic spindle formation
312	Red	AT2G03150	EMB1579	Uncertain	Calcium binding protein
313	Red	AT2G34650	PID	Serine-Threonine Protein Kinase	Positive regulator of polar auxin transport
314	Red	AT2G44190	EMB3116	Novel Microtubule-Associated Protein	Endosperm nuclear division and cellularization
315	RoyalBlue	AT4G13940	EMB1395	S-Adenosyl Homocysteine Hydrolase	Amino acid and nucleotide metabolism;_x000D_ Indirect role in gene silencing
316	Salmon	AT5G46210	CUL4	E3 Ubiquitin Ligase Subunit	None
317	Salmon	AT1G69270	RPK1	Receptor-Like Protein Kinase	Signaling pathways
318	Salmon	AT1G65450	GLAUCE	BAHD Family Acyltransferase	Unknown metabolic role in female gametophyte central cell; _x000D_ Required for fusion with second sperm cell
319	Salmon	AT2G38670	PECT1	Phosphatidylethanolamine Biosynthetic Enzyme	Rate-limiting enzyme in CDP-Etn pathway;_x000D_ Mitochondrial localized protein
320	Tan	AT4G21190	EMB1417	PPR Protein	RNA binding protein; Organellar gene function
321	Tan	AT3G20070	TTN9	Unknown	None
322	Turquoise	AT1G67730	KCR1	B-Ketoacyl-Coenzyme A Reductase	Long-chain fatty acid biosynthesis
323	Turquoise	AT1G28300	LEC2	B3 Domain Transcription Factor	Transcriptional regulation
324	Turquoise	AT5G13510	EMB3136	Chloroplast Ribosomal Protein L10	Translation in chloroplasts
325	Turquoise	AT5G08415	LIP1	Lipoyl Synthase	Lipoamide biosynthesis; Plastid-localized _x000D_ lipoylation of metabolic enzymes
326	Turquoise	AT4G36810	GGPPS11	Geranylgeranyl Diphosphate Synthase	Isoprenoid biosynthesis in plastids and cytosol
327	Turquoise	AT1G77360	APPR6	Mitochondrial PPR Protein	5' maturation and translational initiation of mitochondrial _x000D_ ribosomal protein S3 mRNA
328	Turquoise	AT5G27720	EMB1644	U6 snRNA Associated Protein	Component of spliceosome; Role in pre-mRNA splicing
329	Turquoise	AT5G64580	EMB3144	Chloroplast AAA-ATPase; Ycf2-FtsHi Complex Subunit	Required for chloroplast protein import
330	Turquoise	AT5G63920	TOP3a	Topoisomerase	DNA synthesis and repair
331	Turquoise	AT5G61410	EMB2728	Ribulose-5-Phosphate-3-Epimerase	Role in Calvin cycle; Oxidative pentose phosphate pathway
332	Turquoise	AT5G58250	EMB3143	Unknown	Chloroplast-localized protein
333	Turquoise	AT5G53860	EMB2737	Uncertain	Chloroplast-localized, DnaJ-like protein; _x000D_ Putative chaperone
334	Turquoise	AT5G52920	PKP1	Plastidic Pyruvate Kinase B1 Subunit	Fatty acid and seed oil biosynthesis
335	Turquoise	AT5G51600	PLE	Microtubule-Associated Protein	Coordination of microtubule and membrane dynamics _x000D_ during cytokinesis
336	Turquoise	AT5G50390	EMB3141	PPR Protein	RNA binding protein; Organellar gene function
337	Turquoise	AT5G50280	EMB1006	PPR Protein	RNA binding protein; Organellar gene function
338	Turquoise	AT5G48230	EMB1276	Acetoacetyl CoA Thiolase	Cytosolic mevalonate pathway of isoprenoid biosynthesis
339	Turquoise	AT5G40950	PRPL27	Chloroplast Ribosomal Protein	Translation in chloroplasts
340	Turquoise	AT5G24400	EMB2024	6-Phosphogluconolactonase	Role in pentose phosphate pathway
341	Turquoise	AT5G22640	EMB1211	Chloroplast Protein Import Complex Subunit	Component of 1 MD chloroplast inner membrane _x000D_ protein import complex
342	Turquoise	AT5G16390	CAC1A	Biotin Carboxyl Carrier Protein	Heteromeric acetyl-CoA carboxylase subunit; _x000D_ Fatty acid biosynthesis in plastids
343	Turquoise	AT5G14320	EMB3137	Chloroplast Ribosomal Protein S13	Translation in chloroplasts
344	Turquoise	AT5G13690	CYL1	Alpha-N-Acetyl-Glucosaminidase	Arabinogalactan protein metabolism
345	Turquoise	AT5G10480	PAS2	3-Hydroxyl-Acyl-CoA Dehydratase; Elongase Complex Subunit	Very-long-chain fatty acid biosynthesis
346	Turquoise	AT5G07280	EXS	LRR Receptor Kinase	Signal transduction pathway
347	Turquoise	AT5G04560	DME	DNA Glycosylase	DNA demethylation in central cell of female _x000D_ gametophyte, vegetative cell of male gametophyte
348	Turquoise	AT5G04810	PPR4	PPR Protein	Trans-splicing of chloroplast rps12 transcript
349	Turquoise	AT5G04660	CYP77A4	Cytochrome P450	Epoxidase of unsaturated fatty acids; ER-localized protein
350	Turquoise	AT5G03800	EMB1899	PPR Protein	RNA binding protein; Organellar gene function
351	Turquoise	AT3G63490	EMB3126	Chloroplast Ribosomal Protein L1	Translation in chloroplasts
352	Turquoise	AT5G01075	TWS1	Unknown	Small protein localized to endoplasmic reticulum
353	Turquoise	AT3G63190	HFP108	Chloroplast Ribosome Recycling Factor	Required for efficient chloroplast translation
354	Turquoise	AT3G57560	NAGK	Acetylglutamate Kinase	Arginine biosynthesis
355	Turquoise	AT3G54660	EMB2360	Chloroplast Glutathione Reductase	Protection against oxidative stress
356	Turquoise	AT3G54320	WRI1	AP2/EREB Domain Transcription Factor	Regulation of storage compound biosynthesis
357	Turquoise	AT3G52940	FK	Sterol C-14 Reductase	Sterol biosynthesis during embryo development
358	Turquoise	AT3G47520	pNAD-MDH	Plastid NAD-Dependent Malate Dehydrogenase	Redox homeostasis; Heterotrophic metabolism;_x000D_ Component of plastid Ycf2 complex required for protein import
359	Turquoise	AT3G46740	TOC75-III	Chloroplast Import Protein	Protein translocation channel in plastid outer membrane
360	Turquoise	AT4G34620	SSR16	Mitochondrial Ribosomal Protein S16	Translation in mitochondria and chloroplasts
361	Turquoise	AT4G33680	AGD2	LL-Diaminopimelate Aminotransferase	Lysine biosynthesis
362	Turquoise	AT4G29060	EMB2726	Translation Elongation Factor	Translation in chloroplasts
363	Turquoise	AT4G28210	EMB1923	Unknown	None
364	Turquoise	AT4G00220	JLO	LOB Domain Transcription Factor	Auxin signaling pathways
365	Turquoise	AT3G29290	EMB2076	PPR Protein	RNA binding protein; Organellar gene function
366	Turquoise	AT3G15190	PRPS20	Chloroplast Ribosomal Protein	Translation in chloroplasts
367	Turquoise	AT3G12670	EMB2742	CTP Synthase; UTP-Ammonia Ligase	Ribonucleotide metabolism
368	Turquoise	AT3G18390	EMB1865	Chloroplast Splicing Factor	Splicing of plastid group II introns
369	Turquoise	AT3G19810	DUF177A	Uncertain	23S rRNA accumulation
370	Turquoise	AT3G16290	EMB2083	Chloroplast AAA-ATPase; Ycf2-FtsHi Complex Subunit	Required for chloroplast protein import
371	Turquoise	AT3G25920	RPL15	Chloroplast Ribosomal Protein	Translation in chloroplasts
372	Turquoise	AT3G25860	PLE2	Chloroplast Pyruvate Dehydrogenase Complex E2 Subunit	Acetyl-CoA formation in plastids
373	Turquoise	AT3G26790	FUS3	B3 Domain Transcription Factor	Regulator of gene expression during embryogenesis
374	Turquoise	AT3G26744	ICE1	bHLH Transcriptional Activator	Regulation of stomatal development, cold tolerance, _x000D_ and endosperm breakdown
375	Turquoise	AT3G02660	EMB2768	Tyrosine tRNA Synthetase	Translation in mitochondria and chloroplasts
376	Turquoise	AT3G04790	EMB3119	Ribulose-5-Phosphate Isomerase	Carbohydrate metabolism
377	Turquoise	AT1G12410	EMB3146	Chloroplast Clp Protease Subunit	None
378	Turquoise	AT2G43360	BIO2	Biotin Synthase	Catalyzes final step in biotin synthesis in mitochondria
379	Turquoise	AT1G62340	ALE1	Subtilisin-Like Serine Protease	Cell signaling pathways; Possible role in processing of _x000D_ peptide ligands
380	Turquoise	AT1G06950	TIC110	Chloroplast Inner Membrane Protein	Chloroplast protein import
381	Turquoise	AT1G21970	LEC1	HAP3 Subunit of CCAAT-Binding Transcription Factor	Transcriptional regulation
382	Turquoise	AT1G02560	CLPP5	Chloroplast ClpP Protease Subunit	None
383	Turquoise	AT1G02680	TAF13	Transcriptional Regulator	Functions with PRC2 complex; Transcriptional repressor
384	Turquoise	AT1G07320	EMB2784	Chloroplast Ribosomal Protein L4	Translation in chloroplasts
385	Turquoise	AT1G75350	EMB2184	Chloroplast Ribosomal Protein L31	Translation in chloroplasts
386	Turquoise	AT1G04950	EMB2781	TATA Box Associated Factor; TFIID Subunit	Regulation and initiation of transcription
387	Turquoise	AT1G34430	EMB3003	Dihydrolipoamide S-Acetyltransferase; Chloroplast Pyruvate_x000D_ Decarboxylase Complex, Putative E3 Binding Protein	Acetyl-CoA formation
388	Turquoise	AT1G12770	EMB1586	Mitochondrial RNA Helicase	RNA binding protein; Proposed role in processing _x000D_ mitochondrial transcripts
389	Turquoise	AT1G18370	HIK	Kinesin Required for Cytokinesis	Localized to site of cell plate formation
390	Turquoise	AT1G50650	KRS	Endosperm-Specific, Cysteine-Rich Peptide	STIG1 family of small proteins; Required for normal _x000D_ embryo-endosperm adhesion
391	Turquoise	AT1G35680	RPL21C	Chloroplast Ribosomal Protein L21	Translation in chloroplasts
392	Turquoise	AT1G74970	TWN3	Chloroplast Ribosomal Protein S9	Translation in chloroplasts
393	Turquoise	AT1G74960	FAB1	Ketoacyl Carrier Protein Synthase	Elongation of 16:0-ACP to 18:0-ACP in plastids
394	Turquoise	AT1G48350	EMB3105	Chloroplast Ribosomal Protein L18	Translation in chloroplasts
395	Turquoise	AT1G17220	FUG1	Translation Initiation Factor	Translation in chloroplasts
396	Turquoise	AT1G62750	SCO1	Plastid Elongation Factor G	Translation in chloroplasts
397	Turquoise	AT1G11680	EMB1738	Obtusifoliol 14-Alpha Demethylase	Cytochrome P450 monooxygenase; _x000D_ Sterol biosynthetic enzyme
398	Turquoise	AT1G23400	CAF2	Chloroplast Intron Splicing Factor	Splicing of plastid group II introns
399	Turquoise	AT2G05170	VPS11	Vacuolar Tethering Complex Subunit	Vacuolar biogenesis
400	Turquoise	AT1G78630	EMB1473	Chloroplast Ribosomal Protein L13	Translation in chloroplasts
401	Turquoise	AT1G36160	ACC1	Acetyl-CoA Carboxylase	Very-long-chain fatty acid biosynthesis in cytosol
402	Turquoise	AT1G30610	EMB2279	PPR Protein	Plastid rpl2 and trnK intron splicing
403	Turquoise	AT2G14170	MMSD	Methylmalonate Semialdehyde Dehydrogenase	Valine degradation in mitochondria
404	Turquoise	AT2G27170	TTN7	SMC3 Cohesin	Sister chromatid cohesion; Chromosome segregation
405	Turquoise	AT2G01860	EMB975	PPR Protein	RNA binding protein; Organellar gene function
406	Turquoise	AT2G36000	EMB3114	Uncertain	Chloroplast-localized mTERF domain protein
407	Turquoise	AT2G28000	SLP	Chaperonin 60 alpha 1	Protein folding in chloroplasts
408	Turquoise	AT1G43170	EMB2207	Ribosomal Protein L3A	Translation in cytosol
409	Turquoise	AT1G05190	EMB2394	Chloroplast Ribosomal Protein L6	Translation in chloroplasts
410	Turquoise	AT1G08560	KN	Cytokinesis-Specific Syntaxin	Vesicle fusion in cell division plane
411	Turquoise	AT2G01210	ZAR1	Plasma Membrane LRR-RLK	Signaling pathways; Calmodulin binding
412	Turquoise	AT2G37920	EMB1513	Uncertain	Similar to copper transporter proteins
413	Turquoise	AT2G24090	PRPL35	Chloroplast Ribosomal Protein	Translation in chloroplasts
414	Turquoise	AT2G03050	EMB93	Plastid mTERF-Related Protein	Plastid signaling pathways
415	Turquoise	AT2G32590	EMB2795	Non-SMC Condensin Complex Subunit H	Sister chromatid segregation in mitosis
416	Turquoise	AT2G19450	TAG1	Diacylglycerol Transferase	Storage lipid biosynthesis; Catalyzes final step in triacylglycerol biosynthetic pathway
417	Turquoise	AT2G30200	EMB3147	ACP-S-Malonyltransferase	Fatty acid biosynthesis
418	Turquoise	AT2G33800	EMB3113	Chloroplast Ribosomal Protein S5	Translation in chloroplasts
419	Yellow	AT1G48850	EMB1144	Chorismate Synthase	Aromatic amino acid biosynthesis
420	Yellow	AT5G16715	EMB2247	Valine tRNA Synthetase	Translation in chloroplasts
421	Yellow	AT5G15540	EMB2773	Cohesin-Loading Complex Subunit	Cohesin-chromatin interactions; Sister chromatid cohesion
422	Yellow	AT5G14760	AO	L-Aspartate Oxidase; NAD Biosynthetic Enzyme	Catalyzes first step in NAD biosynthesis from aspartate _x000D_ in plastids
423	Yellow	AT5G56270	WRKY2	WRKY Transcription Factor	Zygote polarity after fertilization
424	Yellow	AT5G54440	CLUB	TRAPPII Tethering Factor	Membrane trafficking; Cell plate assembly during _x000D_ cytokinesis
425	Yellow	AT5G51340	SCC4	Cohesin Loading Complex, Kleisin Subunit	TPR protein; Chromatin structure maintenance
426	Yellow	AT5G49160	MET1	DNA Methyltransferase	DNA (CG) methylation
427	Yellow	AT5G43810	ZLL	Argonaute / EIF2C Family Protein	Small RNA binding protein; Cleavage or translational_x000D_ inhibition of target RNAs
428	Yellow	AT5G08080	SYP132	Cytokinesis-Specific SNARE Protein	Membrane vesicle fusion in cytokinesis
429	Yellow	AT3G54010	PAS1	Immunophilin-Like FK506 Binding Protein	Interacts with fatty acid elongase complex; Required for _x000D_ very-long-chain fatty acid biosynthesis
430	Yellow	AT4G30580	EMB1995	Plastidic Lysophosphatidic Acid Acyltransferase	Fatty acid and phospholipid metabolism
431	Yellow	AT4G24900	TTL	Unknown	C2H2 domain protein; Nuclear localized
432	Yellow	AT4G23100	RML1	Gamma-Glutamylcysteine Synthetase	First enzyme in glutathione biosynthetic pathway;_x000D_ Initiation and maintenance of cell division
433	Yellow	AT1G18640	PSP1	Phosphoserine Phosphatase	Phosphoserine pathway of serine biosynthesis in plastids
434	Yellow	AT3G23110	EMB2800	LRR Receptor-Like Protein	Putative signaling function
435	Yellow	AT3G18110	EMB1270	PPR Protein	RNA binding protein; Organellar gene function
436	Yellow	AT1G10910	EMB3103	PPR Protein	RNA binding protein; Organellar gene function
437	Yellow	AT1G32490	EMB2733	RNA Helicase	Proposed role in pre-mRNA splicing
438	Yellow	AT1G01040	SUS1	RNA Helicase; Dicer-Like Enzyme	Micro RNA biogenesis; Pri-miRNA processing
439	Yellow	AT1G34770	NSE3	Non-SMC Component of SMC5/6 Complex	DNA repair and genome stability
440	Yellow	AT1G50240	TIO	Protein Kinase; Ortholog of FUSED in Animal Systems	Signaling pathways required for cytokinesis
441	Yellow	AT1G79560	EMB1047	Chloroplast AAA-ATPase; Ycf2-FtsHi Complex Subunit	Required for chloroplast protein import
442	Yellow	AT1G55540	LNO1	Nucleoporin; Nuclear Pore Complex Subunit	RNA transport from nucleus to cytosol
443	Yellow	AT2G20300	ALE2	Receptor-Like Protein Kinase	Promotion of protoderm differentiation and cotyledon _x000D_ formation
444	Yellow	AT2G35650	CSLA7	Cellulose-Synthase-Like Glycosyltransferase; _x000D_ Beta-Mannan Synthase	Synthesis of cell wall polysaccharides
445	Yellow	AT2G25710	HCS1	Holocarboxylase Synthetase	Biotin attachment to carboxylases and decarboxylases
